# Supplementary material for: The LRR-TM protein PAN-1 interacts with MYRF to promote its nuclear translocation in synaptic remodeling
Source: eLife. 2021 May 5;10:e67628. doi: 10.7554/eLife.67628 (PMC8099431; doi:10.7554/eLife.67628)
Supplement: Supplementary file 1. [file elife-67628-supp1.xlsx]

## Sheet: MYRF-1(PQN-47).final
Summary table of putative preys identified from PQN-47 Immunoprecipitation Mass Spectrometry (IP-MS) datasets with detailed information
Number of interacting preys: 649
Top 5% wd score threshold: 32
Top 10% wd score threshold: 64
Number of baits: 72 baits
Bait name: PQN-47
MS type: HCD-FTMS
Database-searching software: pFind 3.1 (http://pfind.ict.ac.cn/)
WD score: A scoring metrix for identifying high-confidence candidate interacting proteins (HCIPs) http://besra.hms.harvard.edu/ipmsmsdbs/cgi-bin/tutorial.cgi; Revised
This is a summary table in which the rows are the unique proteins (preys) identified from all IP-MS/MS experiments and the columns represent the statistics of this bait used for IPMS experimens.
Prey: NCBI Entrez gene ID.
WB_ID: Wormbase gene ID.
Tx_ID: stable transcript ID following the principles of parsimony to minimize confusion due to isoforms.
UP_ID: UniPort ID.
Freq(obs): the observed frequency of specific interacting protein across all baits.
Spec_rep1: the spectral count for specific interacting protein from particular bait's IP-MS/MS experiment(technical replicate 1).
Peptide_rep1: the peptide count for specific interacting protein from particular bait's IP-MS/MS experiment (technical replicate 1).
Coverage_rep1: the coverage for specific interacting protein from particular bait's IP-MS/MS experiment (technical replicate 1).
Spec_sum_rep1: the Total Spectral Count (TSC) for particular bait's IP-MS/MS experiment (technical replicate 1).
Norm_spec_rep1: the normalized spectral count (Spec_rep1/Spec_sum_rep1*5,000) for specific interacting protein from particular bait's IP-MS/MS experiment (technical replicate 1).
Pep_seq1_rep1: the amino acid sequence of the first peptide identified from particular bait's IP-MS/MS experiment (technical replicate 1).
Pep_seq2_rep1: the amino acid sequence of the second peptide identified from particular bait's IP-MS/MS experiment (technical replicate 1).
Spec_rep2: the spectral count for specific interacting protein from particular bait's IP-MS/MS experiment (technical replicate 2).
Peptide_rep2: the peptide count for specific interacting protein from particular bait's IP-MS/MS experiment (technical replicate 2).
Coverage_rep2: the coverage for specific interacting protein from particular bait's IP-MS/MS experiment (technical replicate 2).
Spec_sum_rep2: the Total Spectral Count (TSC) for particular bait's IP-MS/MS experiment(technical replicate 2).
Norm_spec_rep2: the normalized spectral count (Spec_rep2/Spec_sum_rep2*5,000) for specific interacting protein from particular bait's IP-MS/MS experiment (technical replicate 2).
Pep_seq1_rep2: the amino acid sequence of the first peptide identified from particular bait's IP-MS/MS experiment (technical replicate 2).
Pep_seq2_rep2: the amino acid sequence of the second peptide identified from particular bait's IP-MS/MS experiment (technical replicate 2).
Avg_norm_spec: the average of normalized spectral count for specific interacting protein from particular bait's IP-MS/MS experiment (all technical replicates).
Functional descriptions: the last four columns are gene functional descriptions downloaded from ftp://ftp.wormbase.org/pub/wormbase/species/c_elegans/annotation/geneIDs/.
Prey	WB_ID	Tx_ID	UP_ID	Freq(obs)	WD_score	Spec_rep1	Peptide_rep1	Coverage_rep1	Spec_sum_rep1	Norm_spec_rep1	Pep_seq1_rep1	Pep_seq2_rep1	Spec_rep2	Peptide_rep2	Coverage_rep2	Spec_sum_rep2	Norm_spec_rep2	Pep_seq1_rep2	Pep_seq2_rep2	Avg_norm_spec	Functional_descriptions
174614	WBGene00004134	F59B10.1	G5EFI7	3	3192.54	2308	354	0.812	23120	499.135	MQYLTQDTDEDDGSMVSPTSSADSMHQNLGVQQQQQQMLQAQQR	RFPESPAMTDPCGNVSSSSSSSHHSDPMFSPNEFNGYAGANDNGNQTMNNIQSQQLSQQQHQQTR	2394	344	0.844	23662	505.874	VSSSSSSSHHSDPMFSPNEFNGYAGANDNGNQTMNNIQSQQLSQQQHQQTR	RFPESPAMTDPCGNVSSSSSSSHHSDPMFSPNEFNGYAGANDNGNQTMNNIQSQQLSQQQHQQTR	502.505	WBGene00004134	pqn-47	F59B10.1	Concise description: pqn-47 encodes a protein with a glutamine/asparagine-rich domain, homologous to human C11orf9 and Drosophila CG3328, that is required for locomotion, vulval development, full body size, cuticular integrity, and general health in mass RNAi assays; pqn-47(cxP5915) homozygotes are sluggish. Provisional description: The protein product of this gene is predicted to contain a gluta…
185896	WBGene00009804	F47B8.3	F47B8.3	2	1087.79	61	13	0.577	23120	13.192	LNPFDVPTFETLEEDTANPEKLPVSR	FWDSNEDKFVNDLK	60	14	0.577	23662	12.6786	LNPFDVPTFETLEEDTANPEKLPVSR	FWDSNEDKFVNDLK	12.9353	WBGene00009804	F47B8.3	F47B8.3	Concise description: none available Provisional description: none available Detailed description: none available
179612	WBGene00004768	F55A11.3	Q20798	1	687.112	6	3	0.077	23120	1.29758	TESPSTSSTAPSTSSPVTASSTPTTSSTR	EEMTVDASPK	6	3	0.077	23662	1.26786	AAEAEHLSER	TESPSTSSTAPSTSSPVTASSTPTTSSTR	1.28272	WBGene00004768	sel-11	F55A11.3	Concise description: sel-11 encodes an E3 ubiquitin ligase; sel-11 was identified in screens for mutations that suppress the egg-laying defective (Egl) phenotype of a hypomorphic lin-12 allele; sel-11 mutations also suppress the temperature-sensitive, maternal-effect embryonic lethality of a glp-1 partial loss-of-function allele; SEL-11 functions as an ER E3 ubiquitin ligase that plays a role in …
187255	WBGene00010731	K10C3.4	K10C3.4	3	683.735	104	15	0.562	23120	22.4913	GDMLLDDDYETEDDLDDVEEVDDEAHDPDGLVVK	NAAAINNIDDIETMEQLNGLLEELLDR	106	17	0.562	23662	22.3988	NAAAINNIDDIETMEQLNGLLEELLDR	GDMLLDDDYETEDDLDDVEEVDDEAHDPDGLVVK	22.445	WBGene00010731	K10C3.4	K10C3.4a	Concise description: none available Provisional description: none available Detailed description: none available
181943	WBGene00007156	B0379.2	B0379.2	1	627.244	5	2	0.031	23120	1.08131	AEELKK	LAEELK	5	2	0.031	23662	1.05655	LAEELK	AEELKK	1.06893	WBGene00007156	B0379.2	B0379.2	Concise description: none available Provisional description: none available Detailed description: none available
181229	WBGene00008999	F21A10.2	D9PTN5	3	572.352	70	13	0.12	23120	15.1384	LHFSETTLNNQR	GFNYSTNDNCFVNQK	81	15	0.14	23662	17.1161	MDQNMDPSFIMHAPVSGK	LHFSETTLNNQR	16.1273	WBGene00008999	F21A10.2	F21A10.2a	Concise description: none available Provisional description: none available Detailed description: none available
175596	WBGene00003915	M88.6	Q9U3A0	4	537.644	164	40	0.677	23120	35.4671	GLNSLEQLILSNNNLENIDWTIFSALK	LIENDPLNIASDSILVVPAMPK	179	43	0.69	23662	37.8244	AFQHTPNLITLLLQYNQIEELSSHSPSQVR	GLNSLEQLILSNNNLENIDWTIFSALK	36.6457	WBGene00003915	pan-1	M88.6a	Concise description: pan-1 encodes a novel predicted transmembrane protein with extracellular leucine-rich repeats; loss of PAN-1 activity via RNAi results in molting defects and arrested L2-sized larvae, indicating that PAN-1 is required for completion of the larval molts; pan-1 expression is enriched in the germline and upregulated in animals mutant for unc-95, which encodes a LIM domain-contai…
178222	WBGene00011940	T23B5.3	T23B5.3	1	486.798	4	2	0.008	23120	0.865052	EAELAK	KEAELAK	2	2	0.008	23662	0.422619	KEAELAK	EAELAK	0.643836	WBGene00011940	T23B5.3	T23B5.3a	Concise description: none available Provisional description: none available Detailed description: none available
184719	WBGene00008976	F20D1.4	Q93537	2	341.177	6	3	0.198	23120	1.29758	FGEGHEQENTNTPK	QQIAIPSDGIAEIHK	6	3	0.198	23662	1.26786	QQIAIPSDGIAEIHK	FGEGHEQENTNTPK	1.28272	WBGene00008976	plp-2	F20D1.4	Concise description: none available Provisional description: none available Detailed description: none available
175172	WBGene00005014	F54C4.2	Q9TZ93	2	312.308	3	2	0.1	23120	0.648789	LCSLVK	VPADLR	7	2	0.1	23662	1.47916	LCSLVK	VPADLR	1.06397	WBGene00005014	spt-4	F54C4.2	Concise description: none available Provisional description: none available Detailed description: none available
183618	WBGene00016780	C49G7.1	C49G7.1	3	161.173	5	2	0.025	23120	1.08131	LNNLEK	LSQEDVLSR	7	2	0.025	23662	1.47916	LNNLEK	LSQEDVLSR	1.28024	WBGene00016780	C49G7.1	C49G7.1	Concise description: none available Provisional description: none available Detailed description: none available
178362	WBGene00003085	Y37A1B.1	H2KMJ3	4	149.213	18	8	0.127	23120	3.89273	SLTGIDLSSVSQWFSMVQIR	SSEVSASSDGVVIINGSAVNVVQK	6	4	0.059	23662	1.26786	STVSEQLSLIEQLR	DIEEILYNGEFGISR	2.5803	WBGene00003085	lst-3	Y37A1B.1a	Concise description: none available Provisional description: none available Detailed description: none available
172430	WBGene00016266	C30F12.7	Q95YD8	4	97.6067	6	4	0.137	23120	1.29758	DLANPTAFIR	ENTEGEYSGLEHEAVPGIVESIK	5	4	0.174	23662	1.05655	IHTADIGGNNSASDVINATLQNIK	VLMDENPKH	1.17707	WBGene00016266	idhg-2	C30F12.7	Concise description: C30F12.7 encodes the C. elegans homolog of the gamma subunit of an NAD+-dependent mitochondrial isocitrate dehydrogenase; by homology, the product of C30F12.7 is predicted to catalyze the formation of alpha-ketoglutarate from isocitrate as part of the citric acid cycle. Provisional description: C30F12.7 encodes the C. elegans homolog of the gamma subunit of an NAD+-dependent …
179027	WBGene00001513	T05H4.14	O16519	5	61.73	4	3	0.021	23120	0.865052	SGEAIIR	SGEAIIR	5	2	0.021	23662	1.05655	SGEAIIR	EPLLVK	0.960801	WBGene00001513	gad-1	T05H4.14	Concise description: The gad-1 gene encodes a WD repeat-containing protein that is required maternally for gastrulation initiation during early embryogenesis by regulating the division timing, spindle orientation, and subsequent inward migration of the two gut precusor (E) cells at the 26-cell stage. Provisional description: The gad-1 gene encodes a WD repeat-containing protein that is required m…
177355	WBGene00015538	C06E7.1	P50305	6	55.6857	9	2	0.25	23120	1.94637	KILTQR	FLFTSESVSEGHPDK	6	2	0.25	23662	1.26786	FLFTSESVSEGHPDK	KILTQR	1.60712	WBGene00015538	sams-3	C06E7.1a	Concise description: none available Provisional description: none available Detailed description: none available
172813	WBGene00003800	C03D6.4	Q17602	5	55.4189	5	4	0.011	23120	1.08131	EAETLK	EAETIK	3	2	0.012	23662	0.633928	LSSNLNQLR	NLILSIER	0.857619	WBGene00003800	npp-14	C03D6.4	Concise description: npp-14 is orthologous to the human gene NUCLEOPORIN, 214-KD (NUP214; OMIM:114350), which encodes part of the nucleopore complex mediating nucleocytoplasmic transport; NUP214, as a fusion gene with DEK (OMIM:125264), is found in a subset of acute myeloid leukemia. Provisional description: npp-14 is orthologous to the human gene NUCLEOPORIN, 214-KD (NUP214; OMIM:114350), which …
179080	WBGene00006801	K11C4.5	I2HAA6	5	55.3134	5	3	0.004	23120	1.08131	LTDFER	SARVIR	3	3	0.004	23662	0.633928	LTDFER	TMPMWFAK	0.857619	WBGene00006801	unc-68	K11C4.5a	Concise description: unc-68 encodes a ryanodine receptor ortholog that is expressed in body-wall muscle cells and is required for normal body tension and locomotion; unc-68 mutants are flaccid, sluggish, and resistant to ryanodine, but have normal muscle ultrastructure; UNC-68 is dispensable for excitation-contraction coupling itself, but may amplify its calcium signals; the unc-68/kra-1(kh30) mu…
173421	WBGene00001391	K01A2.2	H2KY95	5	51.5432	5	2	0.3	23120	1.08131	RLDGLSPAAVEYAK	LATVLEGNKK	2	1	0.175	23662	0.422619	RLDGLSPAAVEYAK	NA	0.751965	WBGene00001391	far-7	K01A2.2a	Concise description: none available Provisional description: none available Detailed description: none available
173480	WBGene00018459	F45D11.14	F45D11.14	18	45.1881	101	29	0.611	23120	21.8426	ASLLFDYMIDCVATIDTK	AFEHSEYTCGQYWK	98	30	0.625	23662	20.7083	TMELLEPSEVFEIYSPATMEIISIAK	ASLLFDYMIDCVATIDTK	21.2754	WBGene00018459	F45D11.14	F45D11.14	Concise description: none available Provisional description: none available Detailed description: none available
181004	WBGene00003185	K08A8.1	Q21307	5	43.845	3	3	0.07	23120	0.648789	LDPNNFDSYDIR	LCDFGIAGR	2	2	0.07	23662	0.422619	LDPNNFDSYDIR	LCDFGIAGR	0.535704	WBGene00003185	mek-1	K08A8.1a	Concise description: mek-1 encodes a MAP kinase kinase (MAPKK) that is involved in the stress response to heavy metals and starvation, and that has the highest homology to mammalian MKK7. Provisional description: mek-1 encodes a MAP kinase kinase (MAPKK) that is involved in the stress response to heavy metals and starvation, and that has the highest homology to mammalian MKK7. Detailed descriptio…
178060	WBGene00011338	T01G1.3	G5EFY6	6	40.3378	4	2	0.027	23120	0.865052	SNLAPNVSHATNYR	TPFSPGSPNFPDQVK	3	2	0.023	23662	0.633928	SNLAPNVSHATNYR	AQQPPIVQPTR	0.74949	WBGene00011338	sec-31	T01G1.3	Concise description: none available Provisional description: none available Detailed description: none available
171744	WBGene00022146	Y71G12B.6	Y71G12B.6	6	39.0922	3	2	0.065	23120	0.648789	ESTITNLQEATDK	VSDDLSISDATR	4	2	0.065	23662	0.845237	ESTITNLQEATDK	VSDDLSISDATR	0.747013	WBGene00022146	Y71G12B.6	Y71G12B.6	Concise description: none available Provisional description: none available Detailed description: none available
177520	WBGene00018900	F55G1.4	Q20849	8	35.8988	5	2	0.006	23120	1.08131	VSAYEQK	DGLLDK	11	2	0.006	23662	2.3244	VSAYEQK	DGLLDK	1.70286	WBGene00018900	rod-1	F55G1.4	Concise description: none available Provisional description: none available Detailed description: none available
180072	WBGene00001878	T10C6.11	Q27894	2	35.8582	39	14	0.667	23120	8.43426	AMSIMNSFVNDVFER	NSFVNDVFER								4.21713	WBGene00001878	his-4	T10C6.11	Concise description: his-4 encodes an H2B histone. Provisional description: his-4 encodes an H2B histone. Detailed description: none available
179340	WBGene00001915	C50F4.5	Q27484	2	35.8532	39	15	0.667	23120	8.43426	AMSIMNSFVNDVFER	NSFVNDVFER								4.21713	WBGene00001915	his-41	C50F4.5	Concise description: his-41 encodes an H2B histone. Provisional description: his-41 encodes an H2B histone. Detailed description: none available
172153	WBGene00002804	Y110A7A.19	Q9N584	6	35.2243	3	2	0.035	23120	0.648789	EQFTSLVQK	SGAVADLLFETLPK	3	2	0.035	23662	0.633928	EQFTSLVQK	SGAVADLLFETLPK	0.641359	WBGene00002804	let-630	not known	Concise description: let-630 was identified in screens for ethyl methanesulfonate (EMS)-induced lethal mutations on the left arm of chromosome I; let-630 is defined by two mutations that result in adult sterility. Provisional description: let-630 was identified in screens for ethyl methanesulfonate (EMS)-induced lethal mutations on the left arm of chromosome I; let-630 is defined by two mutations…
176559	WBGene00004873	Y47D3A.26	B2FDA8	8	35.1903	8	4	0.027	23120	1.7301	KLDEQK	TAVEVIAQNR	5	2	0.013	23662	1.05655	DNTNVSGFSPR	KLDEQK	1.39332	WBGene00004873	smc-3	Y47D3A.26a	Concise description: none available Provisional description: none available Detailed description: none available
180079	WBGene00009048	F22B8.6	O45391	11	32.4515	18	8	0.324	23120	3.89273	ISVGIEDLDDLIADLDQALK	ATFPHFGTDAVHVGQEPEQWDINQVVPPISMSTTYK	17	9	0.39	23662	3.59226	ISVGIEDLDDLIADLDQALK	MATFPHFGTDAVHVGQEPEQWDINQVVPPISMSTTYK	3.74249	WBGene00009048	cth-1	F22B8.6a	Concise description: cth-1 encodes a putative cystathionine gamma-lyase; CTH-1 is orthologous to human CTH (OMIM:607657, mutated in cystathioninuria), extremely similar to its paralog CTH-2, and also paralogous to CBL-1; either CTH-1, or CTH-2, or both proteins weakly inhibit DHC-1 in vivo. Provisional description: F22B8.6 is 86 percentage identical with very few gaps in a BlastP alignment with Z…
184743	WBGene00008986	F20G2.2	F20G2.2	16	32.211	37	15	0.707	23120	8.00173	QLETNSVSTALITQEFLPLLK	LVGEDGLTVLLNNAGILLPYDVEGEK	41	15	0.707	23662	8.66368	QLETNSVSTALITQEFLPLLK	LVGEDGLTVLLNNAGILLPYDVEGEK	8.33271	WBGene00008986	F20G2.2	F20G2.2	Concise description: none available Provisional description: none available Detailed description: none available
178680	WBGene00000111	T08B1.3	O44555	8	30.7118	5	4	0.108	23120	1.08131	AYFNTGATKPAEFR	GVVLAGNEESR	6	4	0.103	23662	1.26786	FDHILYTGCPPVAK	ISALLDESK	1.17458	WBGene00000111	alh-5	T08B1.3	Concise description: none available Provisional description: none available Detailed description: none available
172110	WBGene00002075	F28B3.8	Q9BIB8	7	28.5113	2	2	0.025	23120	0.432526	FFLTDNVTQMLQK	VAALQCLVR	4	3	0.042	23662	0.845237	NMINVFVEPIVQLITR	FFLTDNVTQMLQK	0.638881	WBGene00002075	imb-1	F28B3.8	Concise description: none available Provisional description: none available Detailed description: none available
175085	WBGene00000831	Y54G11A.5	Q27487	16	28.2632	42	14	0.326	23120	9.08304	FYTEEGNWDLVGNNTPIFFIR	LGPNYIQLPVNCPYR	38	11	0.282	23662	8.02975	FYTEEGNWDLVGNNTPIFFIR	LGPNYIQLPVNCPYR	8.5564	WBGene00000831	ctl-2	Y54G11A.5	Concise description: ctl-2 encodes one of three C. elegans catalases; CTL-2 exhibits catalase and peroxidase activity in vitro, and thus likely functions in vivo as an antioxidant enzyme that protects cells from reactive oxygen species; ctl-2 activity is required for normal lifespan as well as for the extended lifespan seen in daf-2 mutant animals; in addition, ctl-2 is required for normal egg-la…
174188	WBGene00017970	F32A5.4	F32A5.4	9	27.7183	7	2	0.167	23120	1.51384	NQQQQSNDVSSQGGNDDGSIPK	FNQQQQR	6	2	0.167	23662	1.26786	NQQQQSNDVSSQGGNDDGSIPK	FNQQQQR	1.39085	WBGene00017970	F32A5.4	F32A5.4a	Concise description: none available Provisional description: none available Detailed description: none available
180307	WBGene00013360	Y60A3A.9	Y60A3A.9	7	27.5762	2	2	0.095	23120	0.432526	QLLDQVDQITK	DKLNELQLR	4	4	0.171	23662	0.845237	QLLDQVDQITK	DKLNELQLR	0.638881	WBGene00013360	Y60A3A.9	Y60A3A.9	Concise description: none available Provisional description: none available Detailed description: none available
180830	WBGene00020658	T21F4.1	T21F4.1	6	27.5179	2	2	0.073	23120	0.432526	QLGCENAVEVIK	DYESAEQELLEK	1	1	0.036	23662	0.211309	QLGCENAVEVIK	NA	0.321918	WBGene00020658	T21F4.1	T21F4.1a	Concise description: T21F4.1 is orthologous to the human gene Arginase Type I Erythroid Variant (ARG1), which contributes most of the arginase activity in the liver. Provisional description: T21F4.1 is orthologous to the human gene Arginase Type I Erythroid Variant (ARG1), which contributes most of the arginase activity in the liver. Detailed description: none available
176261	WBGene00014030	ZK637.13	P30627	25	26.4756	15	5	0.296	23120	3.24394	MVGTEAQNIENGNAFYR	MVGTEAQNIENGNAFYR	17	5	0.296	23662	3.59226	MVGTEAQNIENGNAFYR	MVGTEAQNIENGNAFYR	3.4181	WBGene00014030	glb-1	ZK637.13	Concise description: glb-1 encodes a globin; glb-1 transcription is uninduced by anoxia, but repressed by DAF-2 signalling in a DAF-16 dependent manner; glb-1 is expressed in distal germline, late embryonic cells that are probably hypodermal precursors, and young adults; glb-1 transcription is lower in L3 larvae than in adults, while in adults it is higher than that of most other globins; glb-1 h…
174868	WBGene00013266	Y57A10A.26	Y57A10A.26	8	25.2531	3	2	0.093	23120	0.648789	VPNVMEYVIR	GQDFGWLATDTGFGR	2	2	0.093	23662	0.422619	VPNVMEYVIR	GQDFGWLATDTGFGR	0.535704	WBGene00013266	Y57A10A.26	Y57A10A.26	Concise description: none available Provisional description: none available Detailed description: none available
175461	WBGene00000248	C54C6.2	Q18817	24	25.1144	136	28	0.57	23120	29.4118	EAEGCDCLQGFQLTHSLGGGTGSGMGTLLISK	SGPFGQLFRPDNFVFGQSGAGNNWAK	141	28	0.55	23662	29.7946	EAEGCDCLQGFQLTHSLGGGTGSGMGTLLISK	SGPFGQLFRPDNFVFGQSGAGNNWAK	29.6032	WBGene00000248	ben-1	C54C6.2	Concise description: A beta-tubulin that confers benzimidazole sensitivity. Provisional description: A beta-tubulin that confers benzimidazole sensitivity. Detailed description: none available
173488	WBGene00019311	K02E7.6	K02E7.6	1	24.2984	9	4	0.084	23120	1.94637	KDPVLEELGNLK	DPVLEELGNLK								0.973185	WBGene00019311	K02E7.6	K02E7.6	Concise description: none available Provisional description: none available Detailed description: none available
174805	WBGene00009691	F44E5.4	F44E5.4	38	23.9704	111	9	0.104	23120	24.0052	IINEPTAAALAYGLDK	ARFEELCADLFR	98	10	0.109	23662	20.7083	IINEPTAAALAYGLDK	ARFEELCADLFR	22.3568	WBGene00009691	F44E5.4	F44E5.4	Concise description: F44E5.4 encodes a member of the Hsp70 family of heat shock proteins; as loss of F44E5.4 activity via large-scale RNAi screens results in no obvious defects, the precise role of F44E5.4 in C. elegans development and/or behavior is not yet known. Provisional description: F44E5.4 encodes a member of the Hsp70 family of heat shock proteins; as loss of F44E5.4 activity via large-s…
172477	WBGene00008765	F13G3.5	Q19420	7	22.3997	2	2	0.124	23120	0.432526	SSNTDLVTETDQAVEK	AGIVYNPITNELYLAQLGK	2	1	0.057	23662	0.422619	SSNTDLVTETDQAVEK	NA	0.427573	WBGene00008765	ttx-7	F13G3.5a	Concise description: ttx-7 encodes, by alternative splicing, two isoforms of a myo-inositol monophosphatase (IMPase) required for normal thermotaxis and chemotaxis to sodium, as well as for subcellular localization of SNB-1 and SNG-1 in RIA interneurons; one isoform ('ttx-7a') has much higher transgenic rescuing activity of ttx-7(nj40) than the other ('ttx-7b'), so ttx-7a is considered the major …
178426	WBGene00000370	Y73F8A.6	Q9NA39	13	22.3961	13	6	0.211	23120	2.81142	SVEMATAENKK	IIPAGGCSCDVK	14	4	0.15	23662	2.95833	SVEMATAENKK	IIPAGGCSCDVK	2.88488	WBGene00000370	ccg-1	Y73F8A.6	Concise description: none available Provisional description: none available Detailed description: none available
173468	WBGene00000106	T07D3.7	O16720	13	22.132	6	3	0.029	23120	1.29758	TTPQTLSNLCLK	QALAER	7	4	0.029	23662	1.47916	TTPQTLSNLCLK	QAIAER	1.38837	WBGene00000106	alg-2	T07D3.7a	Concise description: alg-2 encodes a PAZ and PIWI-domain containing protein that is a member of the highly conserved eukaryotic RDE-1/AGO1/PIWI family of proteins that regulate posttranscriptional gene silencing (PTGS); ALG-2 functions with ALG-1 to control specific developmental timing events by positively regulating expression of small temporal RNAs (stRNAs) encoded by lin-4 and let-7; ALG-2 an…
175801	WBGene00000182	B0336.2	Q10943	10	21.8186	6	2	0.138	23120	1.29758	QDLPQAMNAAEVTDK	DAVLLVFANK	6	2	0.138	23662	1.26786	QDLPQAMNAAEVTDK	DAVLLVFANK	1.28272	WBGene00000182	arf-1.2	B0336.2	Concise description: arf-1.2 encodes an ADP-ribosylation factor homolog required in vivo for embryonic development, fertility, locomotion, vulval development, and cuticular synthesis; ARF proteins are N-myristoylated GTPases that regulate membrane traffic and the actin cytoskeleton, and that activate both phospholipase D1 (PLD1) and phosphatidylinositol 4-phosphate 5-kinase. Provisional descripti…
181284	WBGene00011880	T21B6.3	T21B6.3	9	20.9559	4	2	0.035	23120	0.865052	SPLDQHAQLYQQR	EQQQQQQQQQQQQQQR	3	1	0.019	23662	0.633928	EQQQQQQQQQQQQQQR	NA	0.74949	WBGene00011880	T21B6.3	T21B6.3	Concise description: The protein product of this gene is predicted to contain a glutamine/asparagine (Q/N)-rich ('prion') domain, by the algorithm of Michelitsch and Weissman (as of the WS77 release of WormBase, i.e., in wormpep77). Provisional description: Proteins bearing such domains can sometimes stably exist in at least two distinct physical states, each associated with a different phenotype…
171621	WBGene00002079	Y48G1A.5	Q965V4	11	20.5307	6	4	0.039	23120	1.29758	SADALLSSNTPILHK	QAVLVR	8	5	0.05	23662	1.69047	GPGNCPETLR	QAVLVR	1.49402	WBGene00002079	xpo-2	Y48G1A.5	Concise description: imb-5 encodes an importin-beta-like protein orthologous to mammalian CAS proteins (cellular apoptosis susceptibility) and Saccharomyces cerevisiae CSE1 (chromosome segregation 1); IMB-5 is predicted to function in nuclear transport of proteins required for mitotic progression or apoptosis as well as in re-export of importin-alpha, a nuclear import protein; in C. elegans, IMB-…
177900	WBGene00007698	C24F3.4	F3Y5P7	8	20.3325	2	2	0.038	23120	0.432526	ETMALQNIQAR	GNASDQVTVVPIR	3	3	0.053	23662	0.633928	YDCSSADINPIGSVSK	GNASDQVTVVPIR	0.533227	WBGene00007698	qns-1	C24F3.4a	Concise description: none available Provisional description: none available Detailed description: none available
175503	WBGene00014202	ZK1058.1	Q23381	8	20.2659	2	2	0.03	23120	0.432526	ALDAITEGAR	NTYIYPPEPSMR	3	2	0.028	23662	0.633928	ALDAITEGAR	IIGDIFAYTSR	0.533227	WBGene00014202	mmcm-1	ZK1058.1	Concise description: mmcm-1 encodes an ortholog of human methylmalonyl-CoA mutase (MUT, mutated in methylmalonic acidemia; OMIM:609058); MMCM-1 enzyme, in vitro, kinetically resembles its human ortholog; mmcm-1 deletion mutants incorporate abnormally low levels of 1-[(14)C]-propionate into proteins; mmcm-1(RNAi) and mmcm-1 deletion mutant animals excrete abnormally high levels of methylmalonic ac…
180918	WBGene00019620	K10C2.4	Q94272	15	20.1664	16	10	0.218	23120	3.46021	APDAEVPSFGPSK	ASSIVVSGTDLK	19	10	0.206	23662	4.01488	APDAEVPSFGPSK	IQQLLSEDCAVLR	3.73754	WBGene00019620	fah-1	K10C2.4	Concise description: fah-1 encodes a putative fumarylacetoacetate hydrolase, orthologous to human FAH (OMIM:276700, mutated in type I tyrosinemia), that is required for tyrosine metabolism, resistance to oxidative and protein-folding stresses, and more generally for normally rapid growth, normal locomotion, fertility, and viability; fah-1 is expressed in hypodermis and intestine; the intestines o…
174444	WBGene00011977	T24B8.3	T24B8.3	12	19.8585	8	3	0.269	23120	1.7301	ALDKGDENDDVVPTK	IENGKTEEEPAEK	9	3	0.269	23662	1.90178	ALDKGDENDDVVPTK	IENGKTEEEPAEK	1.81594	WBGene00011977	T24B8.3	T24B8.3a	Concise description: none available Provisional description: none available Detailed description: none available
183377	WBGene00016565	C41D11.6	C41D11.6	1	19.6111								6	3	0.015	23662	1.26786	VVQSVNR	LLDAAR	0.63393	WBGene00016565	C41D11.6	C41D11.6	Concise description: none available Provisional description: none available Detailed description: none available
181036	WBGene00003171	ZK154.3	P12456	24	19.6065	71	14	0.32	23120	15.3547	MSATFIGNSTAIQELFK	SLGGGTGSGMGTLLISK	72	14	0.293	23662	15.2143	MSATFIGNSTAIQELFK	SLGGGTGSGMGTLLISK	15.2845	WBGene00003171	mec-7	ZK154.3	Concise description: mec-7 encodes a beta-tubulin required for touch sensitivity along the body wall, and for normal levels of locomotor activity; it is strongly expressed in six touch receptor neurons, with weak expression in FLP, PVD, and BDU cells. Provisional description: mec-7 encodes a beta-tubulin required for touch sensitivity along the body wall, and for normal levels of locomotor activi…
174322	WBGene00002066	M110.4	B5BM24	31	18.4725	9	4	0.044	23120	1.94637	TPCPLSPAQLADFGLDIK	AQANHELSQTGGK	12	5	0.054	23662	2.53571	AQANHELSQTGGK	TPCPLSPAQLADFGLDIK	2.24104	WBGene00002066	ifg-1	M110.4a	Concise description: ifg-1 encodes, by alternative splicing, two orthologs of the translation initiation factor 4F, ribosome/mRNA-bridging subunit (eIF-4G); by homology, IFG-1 is predicted to function in poly(A) tail-dependent translation initiation; loss of ifg-1 activity in adult animals extends lifespan. Provisional description: The protein product of this gene is predicted to contain a glutam…
172687	WBGene00003052	DY3.2	Q21443	46	18.4701	16	11	0.237	23120	3.46021	ETVGPVGIDEVDEEGK	VANNSEEEQSIGGYK	15	9	0.207	23662	3.16964	ETVGPVGIDEVDEEGK	VANNSEEEQSIGGYK	3.31493	WBGene00003052	lmn-1	DY3.2	Concise description: lmn-1 encodes the sole C. elegans nuclear lamin; lmn-1 is an essential gene that is required for a number of nuclear processes, including chromatin organization, cell cycle progression, chromosome segregation, and nuclear pore complex spacing; LMN-1 is also required for nuclear envelope localization of EMR-1/Emerin during early development; LMN-1 localizes to the nuclear peri…
173793	WBGene00000928	M03A1.7	Q86LS4	11	17.8845	6	3	0.316	23120	1.29758	GPTVGEMWDCASLR	GAPSNYLDYAFCTENFNEIR	5	3	0.265	23662	1.05655	GAPSNYLDYAFCTENFNEIR	DADKECVDR	1.17707	WBGene00000928	dao-2	M03A1.7	Concise description: dao-2 encodes a (putatively) secreted protein with a DB module; dao-2 is down-regulated in daf-2 mutant adults by comparison with normal adults, and thus may be involved in dauer formation. Provisional description: DAO-2 is relatively small (136 residues) and shows 31 percentage identity and 45 percentage similarity to human bronectin in an 80 residue region. It has two prote…
180843	WBGene00004788	C54H2.5	Q18864	14	17.1637	7	2	0.076	23120	1.51384	AEDAAEDFFR	APGGQNEMLAK	7	2	0.076	23662	1.47916	AEDAAEDFFR	APGGQNEMLAK	1.4965	WBGene00004788	sft-4	C54H2.5	Concise description: sft-4 encodes a member of the SURF family highly conserved with the mouse Surf-4 gene, and conservation includes an encoded dilysine motif that is implicated in endoplasmic reticulum localization of the mouse protein. Provisional description: sft-4 encodes a member of the SURF family highly conserved with the mouse Surf-4 gene, and conservation includes an encoded dilysine mo…
181007	WBGene00018604	F48E3.3	Q9GPA0	19	17.1629	27	18	0.135	23120	5.8391	IGEDVLQVVIDSFTGK	ILFLDVLFPLDVQK	23	13	0.102	23662	4.86011	IGEDVLQVVIDSFTGK	TNSQVLESDHIFGEK	5.34961	WBGene00018604	uggt-1	F48E3.3	Concise description: uggt-1 encodes one of two C. elegans homologs of UDP-Glc:glycoprotein glucosyltransferase (UGGT), an endoplasmic reticulum enzyme involved in quality control of glycoprotein folding; expression of uggt-1 in S. pombe cells lacking functional UGGT activity indicates that UGGT-1 displays UDP-Glc:glycoprotein glucosyltransferase activity; loss of uggt-1 activity via RNAi results …
179785	WBGene00001387	F15B9.1	Q19478	15	16.8931	14	5	0.365	23120	3.02768	FLEDDKTQTLIAK	DLLPSEVVQAYQDLSPEEK	12	5	0.365	23662	2.53571	FLEDDKTQTLIAK	DLLPSEVVQAYQDLSPEEK	2.7817	WBGene00001387	far-3	F15B9.1	Concise description: none available Provisional description: none available Detailed description: none available
177943	WBGene00006527	C02F4.2	Q0G819	18	16.8689	5	3	0.059	23120	1.08131	LFEVGGSPATTK	NSEQFSHNSVR	5	2	0.042	23662	1.05655	NSEQFSHNSVR	LFEVGGSPATTK	1.06893	WBGene00006527	tax-6	C02F4.2a	Concise description: tax-6 encodes an ortholog of calcineurin A that is required for inhibition and adaptation of several sensory neurons and for the normal regulation of egg-laying by serotonin; TAX-6 stimulates transcription of rcn-1, and binds RCN-1 protein if free Ca[2+] is present; in general, calcineurin positively regulates calcium-dependent signaling; tax-6 loss-of-function mutants exhibi…
181644	WBGene00001130	C02C6.1	Q9U9I9	21	16.7529	16	10	0.116	23120	3.46021	LVSTNELSGGAR	NEYAEFLHK	19	11	0.131	23662	4.01488	QLELGCTNLDEIDAWK	LVSTNELSGGAR	3.73754	WBGene00001130	dyn-1	C02C6.1a	Concise description: dyn-1 encodes the C. elegans ortholog of the dynamin GTPase; dyn-1 activity is required for endocytosis, synaptic vesicle recycling, cytokinesis, and the CED-1 pathway that regulates engulfment and degradation of apoptotic cells; mutations in dyn-1 affect locomotion, egg-laying, defecation, and embryonic development, indicating that dyn-1's endocytic function is required for …
175419	WBGene00003175	C44B11.3	P91910	26	16.7086	42	13	0.269	23120	9.08304	SFGGGTGSGFTSLLMER	SLFHPEQLITGK	42	16	0.342	23662	8.87499	SFGGGTGSGFTSLLMER	AVMVDLEPTVIDEIR	8.97902	WBGene00003175	mec-12	C44B11.3	Concise description: mec-12 encodes an alpha-tubulin; MEC-12 is required for normal mechanosensory response to gentle touch, and specifically for formation of the 15-protofilament microtubule bundle present in the touch receptor neurons; mec-12 interacts genetically with mec-5, which encodes a unique C. elegans collagen secreted by the hypodermis; MEC-12 is highly expressed in the touch neurons a…
179486	WBGene00001747	F29F11.6	G3MU14	11	16.1869	4	2	0.109	23120	0.865052	AHQVVEDGYEFFAK	LFEYGGFPPEANYLFLGDYVDR	4	2	0.085	23662	0.845237	AHQVVEDGYEFFAK	PAVGGGRPGTTAGK	0.855144	WBGene00001747	gsp-1	F29F11.6a	Concise description: none available Provisional description: none available Detailed description: none available
181727	WBGene00020142	T01C8.1	Q95ZQ4	14	16.0616	3	2	0.044	23120	0.648789	ITPTLDNTEASGANR	ETLGVGTFGK	2	2	0.055	23662	0.422619	ITPTLDNTEASGANR	SLADEESGSASASSSR	0.535704	WBGene00020142	aak-2	T01C8.1a	Concise description: aak-2 encodes one of two C. elegans homologs of the catalytic alpha subunit of AMP-activated protein kinases (AMPKs); in C. elegans, aak-2 functions downstream of environmental stressors, energy level signals (AMP:ATP ratio), and daf-2-mediated insulin signaling to positively regulate adult lifespan; in regulating lifespan, aak-2 likely acts in parallel with daf-16/FOXO; aak-…
178507	WBGene00002005	F26D10.3	P09446	72	15.7779	1117	122	0.825	23120	241.566	WLDSNQTAEKEEFEHQQK	TLSSSSQASIEIDSLFEGIDFYTNITR	1213	127	0.87	23662	256.318	TLSSSSQASIEIDSLFEGIDFYTNITR	WLDSNQTAEKEEFEHQQK	248.942	WBGene00002005	hsp-1	F26D10.3	Concise description: hsp-1 encodes hsp70A, a member of the heat shock family of proteins; hsp70A is closely related to the Drosophila heat inducible hsp70s and the S. cerevisiae SSA hsp70 subfamily; the hsp-1 gene is normally expressed throughout development and upon heat-shock the hsp-1 mRNA is enhanced 2-6 fold; down-regulation of hsp-1 via RNA interference results in a small reduction in the l…
179627	WBGene00010790	K12G11.3	Q17334	33	15.7529	106	21	0.668	23120	22.9239	GLGAEWFVDAFETPDIVSHITK	DMSVCPLVGGHEGAGSVVQIGK	103	20	0.67	23662	21.7649	DMSVCPLVGGHEGAGSVVQIGK	GLGAEWFVDAFETPDIVSHITK	22.3444	WBGene00010790	sodh-1	K12G11.3	Concise description: none available Provisional description: none available Detailed description: none available
179539	WBGene00010407	H19N07.3	H19N07.3	10	15.5752	2	2	0.131	23120	0.432526	TASTVEHVIR	MCTLQER	4	2	0.131	23662	0.845237	TASTVEHVIR	MCTLQER	0.638881	WBGene00010407	H19N07.3	H19N07.3a	Concise description: none available Provisional description: none available Detailed description: none available
175434	WBGene00021816	Y53G8AR.9	Y53G8AR.9	14	15.4974	9	2	0.092	23120	1.94637	AIAAVGHGDTIGGIPICK	QQSGGAPAPPK	8	3	0.149	23662	1.69047	AIAAVGHGDTIGGIPICK	AAAAASAVNDYYGTWGQK	1.81842	WBGene00021816	Y53G8AR.9	Y53G8AR.9	Concise description: none available Provisional description: none available Detailed description: none available
173346	WBGene00009554	F39B2.3	F39B2.3	11	15.3482	4	2	0.076	23120	0.865052	NIEAVGTAGSADGIR	ETEFRPLINK	4	3	0.107	23662	0.845237	NIEAVGTAGSADGIR	ETEFRPLINK	0.855144	WBGene00009554	F39B2.3	F39B2.3	Concise description: none available Provisional description: none available Detailed description: none available
180393	WBGene00002060	R04A9.4	Q21693	32	15.2979	6	2	0.114	23120	1.29758	SEEPVAAPGTISHPVYK	HAIYAVEPR	9	4	0.241	23662	1.90178	MSEEPVAAPGTISHPVYK	ISVWTTNSADDGANLR	1.59968	WBGene00002060	ife-2	R04A9.4	Concise description: ife-2 encodes a translation initiation factor 4F, cap-binding subunit (eIF-4E); by homology, IFE-2 is predicted to function in cap-dependent mRNA translation initiation; loss of ife-2 activity in adult animals extends lifespan. Provisional description: ife-2 encodes a translation initiation factor 4F, cap-binding subunit (eIF-4E); by homology, IFE-2 is predicted to function i…
187537	WBGene00001753	R03D7.6	G3MTX8	20	15.219	24	8	0.454	23120	5.19031	TAWEEAQVNSLADQYK	ETCAAPFGQLPFLEVDGK	22	7	0.411	23662	4.6488	TAWEEAQVNSLADQYK	ETCAAPFGQLPFLEVDGK	4.91955	WBGene00001753	gst-5	R03D7.6a	Concise description: gst-5 encodes a glutathione-S-transferase that inhibits CEP-1- and HUS-1-dependent germline apoptosis, as do BMK-1, RAD-50, and RAD-51. Provisional description: gst-5 encodes a glutathione-S-transferase that inhibits CEP-1- and HUS-1-dependent germline apoptosis, as do BMK-1, RAD-50, and RAD-51. Detailed description: none available
172078	WBGene00006791	T04D1.3	A5A8R0	9	15.2074	2	2	0.055	23120	0.432526	YGQQLGDNSDLGK	YQMEDNVK	2	2	0.063	23662	0.422619	QTAQCLENLQQQLGHR	YQMEDNVK	0.427573	WBGene00006791	unc-57	T04D1.3a	Concise description: unc-57 encodes an ortholog of endophilin A that is required for synaptic vesicle endocytosis; UNC-57 is expressed in all neurons, at synapses and neuromuscular junctions, and (weakly) in the spermetheca; like other endophilins, UNC-57 has a large BAR domain, an N-terminal coiled-coil domain within the BAR domain, and a C-terminal SH3 domain; UNC-57 protein is necessary for pr…
180767	WBGene00000066	M03F4.2	Q6A8K1	46	15.0566	281	38	0.779	23120	60.7699	LCYVALDFEQEMATAASSSSLEK	TTGVVLDSGDGVTHTVPIYEGYALPHAILR	266	35	0.779	23662	56.2083	CPEALFQPSFLGMESAGIHETSYNSIMK	LCYVALDFEQEMATAASSSSLEK	58.4891	WBGene00000066	act-4	M03F4.2a	Concise description: act-4 encodes an actin isoform that is most similar to act-2 in amino acid sequence; an act-4 reporter gene is expressed in body wall and vulval muscles and the spermatheca. Provisional description: act-4 encodes an actin isoform that is most similar to act-2 in amino acid sequence; an act-4 reporter gene is expressed in body wall and vulval muscles and the spermatheca. Detai…
181719	WBGene00015547	C06G1.4	Q17740	16	15.0089	5	3	0.053	23120	1.08131	ALMDAGIVQPQEQR	IPALDSVENELK	3	2	0.034	23662	0.633928	ALMDAGIVQPQEQR	FPFPVPAK	0.857619	WBGene00015547	ain-1	C06G1.4	Concise description: ain-1 encodes an unfamiliar protein synergistically required, with LIN-31, for the normal timing of vulval differentiation, independently of LET-60/RAS, and parallel to or downstream of LIN-14/LIN-28/HBL-1; AIN-1 is expressed in cytoplasmic foci (that are probably P bodies) in several tissues, including vulval precursor cells and neurons; AIN-1 coimmunoprecipitates with DCR-1…
177751	WBGene00009877	F49C12.7	F49C12.7	13	14.8772	4	2	0.053	23120	0.865052	IAEESAGHNLK	VMNTCLSPEER	3	2	0.053	23662	0.633928	IAEESAGHNLK	VMNTCLSPEER	0.74949	WBGene00009877	F49C12.7	F49C12.7a	Concise description: none available Provisional description: none available Detailed description: none available
176928	WBGene00021934	Y55F3AR.3	U4PBK9	45	14.177	28	16	0.321	23120	6.05536	IAVYTCPFDLTQTETK	ELEIQHPAAR	35	17	0.343	23662	7.39582	IAVYTCPFDLTQTETK	LFVTNDAATILK	6.72559	WBGene00021934	cct-8	Y55F3AR.3	Concise description: cct-8 encodes a putative theta subunit of the eukaryotic cytosolic ('T complex') chaperonin, orthologous to human CCT8, ENSG00000020219, and CCT8L2/KCNMB3L; in mass RNAi assays, CCT-8 is required for transgene repression, distal tip cell migration, embryonic and larval viability, fertility, normal body coloration, locomotion, and vulval development, and normally rapid growth.…
180601	WBGene00001685	K10B3.7	P17330	29	14.135	90	20	0.672	23120	19.4637	VINDNFGIIEGLMTTVHAVTATQK	DPAEIQWGASGADYVVESTGVFTTIEK	77	19	0.569	23662	16.2708	VINDNFGIIEGLMTTVHAVTATQK	GTVAHEGDYLLVAK	17.8672	WBGene00001685	gpd-3	K10B3.7	Concise description: gpd-3 encodes a predicted glyceraldehyde 3-phosphate dehydrogenase that affects embryonic viability; GPD-3 interacts with LIN-2 in two-hybrid assays. Provisional description: gpd-3 encodes a predicted glyceraldehyde 3-phosphate dehydrogenase that affects embryonic viability; GPD-3 interacts with LIN-2 in two-hybrid assays. Detailed description: none available
259738	WBGene00000830	Y54G11A.6	O61235	36	14.09	96	29	0.626	23120	20.7612	FYTEEGNWDLVGNNTPIFFIR	DGAMAYESQGDAPNYFPNSFR	92	26	0.6	23662	19.4405	FYTEEGNWDLVGNNTPIFFIR	DGAMAYESQGDAPNYFPNSFR	20.1009	WBGene00000830	ctl-1	Y54G11A.6	Concise description: ctl-1 encodes one of three C. elegans catalases; CTL-1 exhibits catalase activity in vitro, and thus likely functions in vivo as an antioxidant enzyme that protects cells from reactive oxygen species; ctl-1 activity contributes to the extended lifespan seen in daf-2 mutant animals; in addition, ctl-1 expression is negatively regulated by DAF-2-mediated insulin signaling; as C…
175819	WBGene00000381	F01F1.8	G8JY43	44	14.0042	26	12	0.208	23120	5.62284	IVTEGFEWANTK	QAESLVLEGLHPR	18	10	0.178	23662	3.80357	IVTEGFEWANTK	QAESLVLEGLHPR	4.71321	WBGene00000381	cct-6	F01F1.8a	Concise description: cct-6 encodes, by alternative splicing, two isoforms of a putative zeta subunit of the eukaryotic cytosolic ('T complex') chaperonin, orthologous to human CCT6A (OMIM:104613); CCT-6 represses SKN-1-dependent transcription of gst-4; CCT-6 is expressed in a few cells of pre-comma stage embryos; in mass RNAi assays, CCT-6 is required for normally short life span, and for normal …
175551	WBGene00006331	R10E4.2	D5MCQ8	11	13.702	2	2	0.059	23120	0.432526	EGPALLIK	NLYIRGLMPNTNDDLLR	4	3	0.073	23662	0.845237	GLMPNTNDDLLR	EGPALLIK	0.638881	WBGene00006331	sup-26	R10E4.2a	Concise description: sup-26 encodes an RRM domain-containing protein; SUP-26 functions in somatic sex determination via negative regulation of tra-2 translation; SUP-26 binds the tra-2 28-nucleotide repeat element known as the TRA-2/GLI element (TGE), which is located in tra-2 3&#8242;untranslated region (UTR); SUP-26 physically interacts with the poly(A)-binding protein PAB-1, suggesting that it…
189590	WBGene00021334	Y34D9A.10	Q9BL83	12	13.6806	3	2	0.058	23120	0.648789	GILLFGPPGTGK	LSGAIVMEKPNVK	4	3	0.053	23662	0.845237	GILLFGPPGTGK	NYNTLTDQDFK	0.747013	WBGene00021334	vps-4	Y34D9A.10	Concise description: none available Provisional description: none available Detailed description: none available
181348	WBGene00001502	F52D10.3	Q95ZT1	67	13.6752	44	13	0.492	23120	9.51557	QAFDDAIAELDTLNEDSYK	DICQDVLNLLDK	51	14	0.52	23662	10.7768	QAFDDAIAELDTLNEDSYKDSTLIMQLLR	QAFDDAIAELDTLNEDSYK	10.1462	WBGene00001502	ftt-2	F52D10.3a	Concise description: none available Provisional description: none available Detailed description: none available
174330	WBGene00000379	K01C8.10	P47208	49	13.6593	25	10	0.244	23120	5.40657	AQDIEAGDGTTTVVVMAGALLDAAQNLLSK	NLAQTQHGATQYCWR	21	9	0.243	23662	4.43749	AQDIEAGDGTTTVVVMAGALLDAAQNLLSK	ILDEMSSPVDLSNDALLNK	4.92203	WBGene00000379	cct-4	K01C8.10	Concise description: cct-4 encodes a putative delta subunit of the eukaryotic cytosolic ('T complex') chaperonin, orthologous to human CCT4 (OMIM:605142); CCT-4 represses SKN-1-dependent transcription of gst-4; CCT-4 is expressed in pharynx, pharyngeal gland cells, intestine, renal gland cells, and neurons; CCT-4 is expressed in touch receptor neurons in a MEC-3-dependent fashion. Provisional des…
180583	WBGene00022199	Y71H10A.1	Q9TZL8	27	13.6439	35	18	0.281	23120	7.5692	STVESSAILESVEEESADSHMF	EATWNTVSDIIQQGGTIIGSAR	43	19	0.286	23662	9.0863	STVESSAILESVEEESADSHMF	EATWNTVSDIIQQGGTIIGSAR	8.32775	WBGene00022199	pfk-1	Y71H10A.1a	Concise description: Y71H10A.1 encodes two isoforms of a putative 6-phosphofructokinase, paralogous to C50F4.2; Y71H10A.1 is expressed in proximal germline and in several larval and adult tissues (including neurons, hypodermis, and pharyngeal muscle); Y71H10A.1 is required for embryonic viability in mass RNAi assays. Provisional description: Y71H10A.1 encodes two isoforms of a putative 6-phosphof…
179286	WBGene00002015	T27E4.8	P34696	23	13.4569	10	5	0.441	23120	2.16263	VILLPEDVDVGAVASNLSEDGK	GSPSESSEIVNNDQK	12	5	0.448	23662	2.53571	VILLPEDVDVGAVASNLSEDGK	GSPSESSEIVNNDQK	2.34917	WBGene00002015	hsp-16.1	T27E4.8	Concise description: hsp-16.1 encodes a 16-kD heat shock protein (HSP) that is a member of the hsp16/hsp20/alphaB-crystallin (HSP16) family of heat shock proteins, and that is identical to the protein encoded by hsp-16.11; an hsp-16.1 reporter fusion, expressed broadly but most strongly in muscle and hypodermis, is induced solely in response to heat shock or other environmental stresses; expressi…
173149	WBGene00001746	Y18D10A.5	Q9U2Q9	11	13.2817	3	2	0.061	23120	0.648789	EQIQSMNPNYK	LSTTNEMVAIK	2	2	0.066	23662	0.422619	LSTTNEMVAIK	VHTPAEAIDLISK	0.535704	WBGene00001746	gsk-3	Y18D10A.5	Concise description: gsk-3 encodes the C. elegans glycogen synthase kinase ortholog; during embryonic development, GSK-3 functions in the Wnt signaling pathway that restricts specification of mesendodermal tissue to the appropriate blastomere; GSK-3 also functions in a Wnt pathway that regulates anteroposterior axon guidance; GSK-3 plays a role in regulating the oocyte-to-embryo transition, by ph…
172514	WBGene00008415	D2030.5	G5EEG4	11	13.1636	3	3	0.185	23120	0.648789	IELLHPFGEK	EVMFLHPK	3	3	0.185	23662	0.633928	IELLHPFGEK	EVMFLHPK	0.641359	WBGene00008415	mce-1	D2030.5	Concise description: none available Provisional description: none available Detailed description: none available
173807	WBGene00004461	F10G7.8	Q19324	23	13.1597	20	10	0.218	23120	4.32526	LAELLDFPVDEMESFVCNLIVTGQITGAK	DAVAAVESLNNIEK	22	10	0.216	23662	4.6488	LAELLDFPVDEMESFVCNLIVTGQITGAK	DAVAAVESLNNIEK	4.48703	WBGene00004461	rpn-5	F10G7.8	Concise description: none available Provisional description: none available Detailed description: none available
175951	WBGene00000998	K07E12.1	Q8MQ08	23	12.9762	20	13	0.014	23120	4.32526	SGVATCQAVNSEGSDEK	FGKPVETDDNDKPVITVVDNDGNELSK	26	16	0.018	23662	5.49404	FGKPVETDDNDKPVITVVDNDGNELSK	SGVATCQAVNSEGSDEK	4.90965	WBGene00000998	dig-1	K07E12.1a	Concise description: dig-1 encodes a giant member of the immunoglobulin superfamily; dig-1 functions cell non-autonomously to mediate axon fasciculation and maintenance of cell body position within ganglia; dig-1 is also required for proper placement of the gonad; dig-1 is initially expressed in the developing embryonic gut and then expressed by a number of different muscle cells, including the b…
178670	WBGene00020391	T10B5.5	Q9TZS5	45	12.9627	21	11	0.252	23120	4.54152	QLCQNAGLDALDVLNK	EAVGDNLVACVWEPSIVK	22	10	0.236	23662	4.6488	QLCQNAGLDALDVLNK	EAVGDNLVACVWEPSIVK	4.59516	WBGene00020391	cct-7	T10B5.5a	Concise description: cct-7 encodes a putative eta subunit of the eukaryotic cytosolic ('T complex') chaperonin, orthologous to human CCT7 (OMIM:605140); CCT-7 is expressed in most, if not all, tissues; in mass RNAi assays, CCT-7 is required for normal transgene repression and subcellular localization, embryonic and larval viability, fertility, vulval development, and normal locomotion. Provisiona…
173581	WBGene00018782	F54A3.3	Q9N4J8	46	12.8262	26	13	0.289	23120	5.62284	ESGHQVQIGNINACK	QALEDMIQWSENK	28	11	0.243	23662	5.91666	ESGHQVQIGNINACK	QALEDMIQWSENK	5.76975	WBGene00018782	cct-3	F54A3.3	Concise description: cct-3 encodes a putative gamma subunit of the eukaryotic cytosolic ('T complex') chaperonin, orthologous to human CCT3 (OMIM:600114); in early embryos, CCT-3 is required for normally fast microtubule elongation; CCT-3 is also required to repress SKN-1-dependent transcription of gst-4; in mass RNAi assays, CCT-3 is required for normal embryonic and larval viability, and for fe…
174185	WBGene00017128	E04F6.9	E04F6.9	13	12.7044	4	2	0.219	23120	0.865052	ADVGTYSEHPAK	TVAGGDQIFHLDGDNK	5	2	0.219	23662	1.05655	TVAGGDQIFHLDGDNK	ADVGTYSEHPAK	0.960801	WBGene00017128	E04F6.9	E04F6.9	Concise description: none available Provisional description: none available Detailed description: none available
177059	WBGene00021868	Y54G2A.2	Q9BMU4	17	12.6671	10	8	0.159	23120	2.16263	LESDLQESYENYLK	TANATAAPGAADGLR	10	6	0.108	23662	2.11309	LESDLQESYENYLK	TANATAAPGAADGLR	2.13786	WBGene00021868	Y54G2A.2	Y54G2A.2a	Concise description: none available Provisional description: none available Detailed description: none available
181778	WBGene00006602	ZK54.2	Q7YZT6	2	12.6434								5	3	0.023	23662	1.05655	AEELKK	MDPFDRPK	0.528275	WBGene00006602	tps-1	ZK54.2a	Concise description: none available Provisional description: none available Detailed description: none available
191455	WBGene00006534	ZK899.4	P52274	4	12.5028								17	5	0.104	23662	3.59226	FDGALNVDLNEFQTNLVPYPR	EDAANNYAR	1.79613	WBGene00006534	tba-8	ZK899.4	Concise description: tba-8 encodes a member of the alpha tubulin family with high similarity to the human tubulin alpha-6 chain; expressed in some neurons with occasional expression in the hypodermis. Provisional description: tba-8 encodes a member of the alpha tubulin family with high similarity to the human tubulin alpha-6 chain; expressed in some neurons with occasional expression in the hypod…
178006	WBGene00002344	M7.1	P35129	18	12.2818	6	3	0.156	23120	1.29758	SQWSPALTISK	VAFTTR	4	2	0.116	23662	0.845237	SQWSPALTISK	YNQLAR	1.07141	WBGene00002344	let-70	M7.1	Concise description: let-70 encodes a class I E2 ubiquitin conjugating enzyme; let-70 was identified in screens for essential genes and phenotypic analyses indicate that loss of let-70 activity results in embryonic and larval lethality with defects in sarcomere assembly; purified LET-70 can stimulate the self-ubiquitylation activities of CHN-1 and UFD-2, E4 ubiquitin conjugation factors and, in a…
178169	WBGene00009436	F35G2.2	Q20062	55	11.8762	123	19	0.804	23120	26.6003	QMEQAGAILTTSEATILGLVGGSDHPK	QMEQAGAILTTSEATILGLVGGSDHPK	114	22	0.799	23662	24.0893	QMEQAGAILTTSEATILGLVGGSDHPK	QMEQAGAILTTSEATILGLVGGSDHPK	25.3448	WBGene00009436	F35G2.2	F35G2.2	Concise description: none available Provisional description: none available Detailed description: none available
181026	WBGene00017864	F27D9.5	Q19842	33	11.8461	67	26	0.428	23120	14.4896	MADEAVCVGEAPTAK	VSMIPGYDGEIADEDMCVK	62	29	0.46	23662	13.1012	LQVEHPITECITGIDIVQQMLR	MADEAVCVGEAPTAK	13.7954	WBGene00017864	pcca-1	F27D9.5	Concise description: The F27D9.5 gene encodes an ortholog of the human gene PROPIONYL-COA CARBOXYLASE ALPHA SUBUNIT (PCCA), which when mutated leads to propionicaciduria, type I (OMIM:232000). Provisional description: The F27D9.5 gene encodes an ortholog of the human gene PROPIONYL-COA CARBOXYLASE ALPHA SUBUNIT (PCCA), which when mutated leads to propionicaciduria, type I (OMIM:232000). Detailed …
179160	WBGene00002078	ZK742.1	Q8MPS6	14	11.7756	3	2	0.019	23120	0.648789	EAEIQQAQQR	AVTTAGEEALK	4	2	0.019	23662	0.845237	EAEIQQAQQR	AVTTAGEEALK	0.747013	WBGene00002078	xpo-1	ZK742.1a	Concise description: xpo-1 encodes exportin-1, an importin-beta-like protein orthologous to Drosophila, vertebrate, and yeast exportin-1/CRM1; XPO-1 is predicted to function as a nuclear export receptor for proteins containing leucine-rich nuclear export signals; in C. elegans, XPO-1 is essential for embryogenesis and larval development, and may also be required for normal body morphology and pos…
179616	WBGene00004258	D2023.2	H2L2E4	50	11.7043	105	41	0.38	23120	22.7076	GLPPVAAYLTIDQIIETALK	SYSEAQAAFGDGSLFVEK	119	47	0.425	23662	25.1458	GLPPVAAYLTIDQIIETALK	SYSEAQAAFGDGSLFVEK	23.9267	WBGene00004258	pyc-1	D2023.2a	Concise description: pyc-1 encodes the C. elegans pyruvate carboxylase ortholog (OMIM:266150, deficiencies in humans are associated with lactic acidemia, neurological abnormalities, and early death); by homology, PYC-1 is predicted to function as a key regulatory enzyme of gluconeogenesis, lipogenesis, and anaplerosis, localizing to the mitochondrial matrix and catalyzing the formation of oxaloac…
181473	WBGene00003903	F18H3.3	Q19579	20	11.6613	7	5	0.082	23120	1.51384	LSLGYAYVNFQQPADAER	AQLASQYMQR	11	7	0.108	23662	2.3244	LSLGYAYVNFQQPADAER	LNDSILEGTDCK	1.91912	WBGene00003903	pab-2	F18H3.3a	Concise description: pab-2 encodes a polyadenylate-binding protein 1 homolog with high similarity to human PABP 1. Provisional description: pab-2 encodes a polyadenylate-binding protein 1 homolog with high similarity to human PABP 1. Detailed description: none available
175403	WBGene00018991	F56F11.4	F56F11.4	19	11.6286	15	7	0.199	23120	3.24394	GVLLYGPPGTGK	IAEQIPGASGAEVK	12	5	0.148	23662	2.53571	TMLELLNQLDGFEATK	GVLLYGPPGTGK	2.88983	WBGene00018991	F56F11.4	F56F11.4a	Concise description: none available Provisional description: none available Detailed description: none available
172041	WBGene00000962	T21E12.4	Q19020	21	11.3807	9	7	0.018	23120	1.94637	IQFVGACNPPTDPGR	ASVACGPMVK	9	7	0.02	23662	1.90178	NVDFLDVDSPAWENAFK	VAAADLVVPTIDTVR	1.92407	WBGene00000962	dhc-1	T21E12.4	Concise description: dhc-1 encodes a cytoplasmic dynein heavy chain homolog required in one-cell embryos for pronuclear migration, centrosome separation, centrosome proximity to the male pronucleus, and mitotic spindle orientation, suggesting that DHC-1 helps position the microtubule organizing center; DHC-1 genetically interacts with SPD-5, a coiled-coil centrosomal protein. Provisional descript…
172584	WBGene00010560	K04G2.1	iftb-1	23	11.3757	3	3	0.124	23120	0.648789	DKNPDFAGDK	TAGEEVVEEK	3	2	0.08	23662	0.633928	TAGEEVVEEK	DKNPDFAGDK	0.641359	WBGene00010560	iftb-1	K04G2.1	Concise description: iftb-1 encodes the C. elegans ortholog of translation initiation factor 2 beta (eIF2beta); by homology, IFTB-1 is predicted to function in translation initiation and start codon recognition; loss of iftb-1 via RNAi indicates that iftb-1 activity is required for a number of processes including growth, development, and body morphogenesis; loss of iftb-1 activity in adult animal…
177325	WBGene00022774	ZK616.4	Q9N4N4	13	11.328	4	3	0.067	23120	0.865052	NVVLSCFAQGR	VFAAPTQAER	3	2	0.048	23662	0.633928	VFAAPTQAER	NVVLSCFAQGR	0.74949	WBGene00022774	swsn-6	ZK616.4	Concise description: none available Provisional description: none available Detailed description: none available
175171	WBGene00021043	W05G11.6	Q8ITY0	52	11.2728	181	45	0.668	23120	39.1436	DEGWLAEHMLIMGVTNPEGEEK	ANTIFTNVAETADGEYFWEGLEK	176	43	0.684	23662	37.1904	DEGWLAEHMLIMGVTNPEGEEK	ANTIFTNVAETADGEYFWEGLEK	38.167	WBGene00021043	pck-1	W05G11.6a	Concise description: pck-1 is one of three C. elegans genes that encode proteins with similarity to phosphoenolpyruvate carboxykinase (PEPCK); by similarity, the products of W05G11.6 are predicted to function in gluconeogenesis. Provisional description: pck-1 is one of three C. elegans genes that encode proteins with similarity to phosphoenolpyruvate carboxykinase (PEPCK); by similarity, the prod…
181209	WBGene00007653	C17G1.7	Q93244	23	11.1931	17	8	0.264	23120	3.67647	YLQEQNPGVR	AYGSEVVLTDPAK	19	9	0.284	23662	4.01488	YLQEQNPGVR	LIVTCLPSCGER	3.84567	WBGene00007653	cysl-1	C17G1.7	Concise description: cysl-1 encodes a homolog of sulfhydrylases/cysteine synthases; CYSL-1 functions in neurons to transduce signals from H2S (hydrogen sulfide), which accumulates during hypoxia, to the EGL-9 proline hydroxylase to regulate O2-dependent behavioral plasticity in C. elegans via neuronal activation of the HIF-1 hypoxia-inducible transcription factor.; specifically, CYSL-1 physically…
172726	WBGene00001843	W06D4.1	Q9Y041	34	11.1557	55	14	0.465	23120	11.8945	CSHGLYAEQLSGTAFTAPR	GYILEVYGTHFQLPDLGPIGANGLANPR	57	14	0.446	23662	12.0446	CSHGLYAEQLSGTAFTAPR	NCMSEYMGLITGCYEAK	11.9695	WBGene00001843	hgo-1	W06D4.1	Concise description: hgo-1 encodes a putative homogentisate 1,2-dioxygenase, orthologous to human HGD (OMIM:607474, mutated in alkaptonuria), that is required for normal resistance to hypertonic stress; HGO-1 is expressed in larval and adult hypodermis and intestine, and in larval pharynx; HGO-1 is required for the tyrosinemic phenotype of K10C2.4(RNAi) animals. Provisional description: Either hg…
179153	WBGene00004453	C26F1.9	P52814	19	11.1039	11	3	0.196	23120	2.37889	QNRPMPQWVR	PMPQWVR	9	3	0.196	23662	1.90178	QNRPMPQWVR	PMPQWVR	2.14033	WBGene00004453	rpl-39	C26F1.9	Concise description: rpl-39 encodes a large ribosomal subunit L39 protein. Provisional description: rpl-39 encodes a large ribosomal subunit L39 protein. Detailed description: none available
176991	WBGene00001173	F55A8.2	U4PRL6	23	11.015	22	11	0.174	23120	4.75779	DLKPENCLLANTGYLK	VLNQGDFFGER	16	10	0.143	23662	3.38095	VTQQIEGETEPR	TFEAHELQK	4.06937	WBGene00001173	egl-4	F55A8.2a	Concise description: egl-4 encodes a cyclic GMP-dependent protein kinase that may act through the TGF-beta signaling pathway to relay sensory cues that modulate chemosensory behavior, dauer formation, foraging, egg laying, body size, and endoreduplication in response to dietary restriction; egl-4 is also required for lethargus, a sleep-like state that is induced before each of the four larval mol…
174421	WBGene00000378	T21B10.7	P47207	40	10.8155	11	8	0.191	23120	2.37889	ILISGNPESAGGIK	LCMVSSAAEATEQILR	13	9	0.197	23662	2.74702	ILISGNPESAGGIK	GATQQILDESER	2.56296	WBGene00000378	cct-2	T21B10.7	Concise description: cct-2 encodes a putative beta subunit of the eukaryotic cytosolic ('T complex') chaperonin, orthologous to human CCT2 (OMIM:605139); CCT-2 is expressed in most, if not all, tissues; CCT-2 represses SKN-1-dependent transcription of gst-4; CCT-2 is expressed in touch receptor neurons in a MEC-3-dependent fashion; in mass RNAi assays, CCT-2 is required for normal transgene repre…
179162	WBGene00003242	C37C3.6	O76840	49	10.7367	56	19	0.108	23120	12.1107	LLAADACPADEQEKFDTER	YISCNLNACESGTDFR	50	19	0.111	23662	10.5655	LLAADACPADEQEKFDTER	YISCNLNACESGTDFR	11.3381	WBGene00003242	mig-6	C37C3.6a	Concise description: mig-6 encodes at least two protein isoforms (long and short) that are highly similar to the extracellular matrix proteins papilin and lacunin; mig-6 is an essential gene required for embryonic hypodermal cell enclosure and normal excretory canal cell function in L1 larvae; MIG-6(S) activity is required cell nonautonomously for the ventral to dorsal phase of distal tip cell (D…
172977	WBGene00004466	B0205.3	O61742	14	10.7339	3	2	0.075	23120	0.648789	LQSQQDAVNLVTQCK	FSTFVDTLNGK	4	3	0.142	23662	0.845237	LQSQQDAVNLVTQCK	EGSGSSLIVVPQGSSLTDALLQSSVCK	0.747013	WBGene00004466	rpn-10	B0205.3	Concise description: rpn-10 encodes a protein that contains two ubiquitin interaction motifs and is a member of the von Willebrand factor, type A superfamily similar to the mouse 26S proteasome non-ATP regulatory subunit 4. Provisional description: rpn-10 encodes a protein that contains two ubiquitin interaction motifs and is a member of the von Willebrand factor, type A superfamily similar to th…
176341	WBGene00000550	F55H2.6	Q9TYW0	30	10.6744	22	15	0.148	23120	4.75779	LPTSYPVSSWVGNPLK	EACAVVHSIYEDR	24	14	0.136	23662	5.07142	LPTSYPVSSWVGNPLK	EDSASYYGYPIEADSLEK	4.9146	WBGene00000550	clu-1	F55H2.6	Concise description: clu-1 encodes an ortholog of CLU1/TIF31 in S. cerevisiae, which directs proper cytoplasmic distribution of mitochondria and physically interacts with eukaryotic translation initiation factor 3 (eIF3); worm CLU-1 may be required for the proper distribution of mitochondria. Provisional description: clu-1 encodes an ortholog of CLU1/TIF31 in S. cerevisiae, which directs proper c…
190051	WBGene00021697	Y48G9A.3	B3CJ34	27	10.6214	16	11	0.048	23120	3.46021	LVEALGTPSQTVQESVSR	QEEAEQLIR	15	11	0.044	23662	3.16964	IVAPDGLSDR	ETAIQNVLQCK	3.31493	WBGene00021697	gcn-1	Y48G9A.3	Concise description: none available Provisional description: none available Detailed description: none available
176749	WBGene00012803	Y43F4B.5	Y43F4B.5	17	10.3837	8	5	0.114	23120	1.7301	VYILNSAVSSQIVK	IGEAEVASVR	6	4	0.086	23662	1.26786	SLQDQLYALYNR	IGEAEVASVR	1.49898	WBGene00012803	Y43F4B.5	Y43F4B.5a	Concise description: none available Provisional description: none available Detailed description: none available
177089	WBGene00003153	Y67D8C.10	B7CED8	26	10.3408	21	13	0.138	23120	4.54152	EVVAVTGDGTNDGPALK	EASDIILTDDNFTSIVK	23	15	0.154	23662	4.86011	EVVAVTGDGTNDGPALK	MDESSLTGESDQIR	4.70082	WBGene00003153	mca-3	Y67D8C.10a	Concise description: mca-3 encodes one of three C. elegans plasma membrane Ca2+ ATPases (PMCAs); by homology, MCA-3 is predicted to function as a molecular pump that couples ATP hydrolysis to extrusion of cytosolic Ca2+; mca-3 activity is required for coelomoycte endocytosis, normal coordinated locomotion, and embryonic and larval development; in regulating endocytosis, MCA-3 is required specific…
178419	WBGene00012768	Y41E3.10	Q9U2H9	25	10.301	28	11	0.483	23120	6.05536	SSVILDVKPWDDETDLGEMEK	SIEMDGLVWGGAK	25	10	0.46	23662	5.28273	SSVILDVKPWDDETDLGEMEK	KLQIITVIEDLK	5.66904	WBGene00012768	eef-1B.2	Y41E3.10a	Concise description: none available Provisional description: none available Detailed description: none available
172799	WBGene00002070	K07A1.8	G5EDE8	13	10.2395	4	3	0.069	23120	0.865052	IAQGGAGAGGVDSSMHQK	APNLAQR	2	2	0.051	23662	0.422619	IAQGGAGAGGVDSSMHQK	APNLAQR	0.643836	WBGene00002070	ile-1	K07A1.8	Concise description: ile-1 is orthologous to the human gene human ERGIC-53, which when mutated leads to deficiency of coagulation factors V/VIII (OMIM:227300). Provisional description: ile-1 is orthologous to the human gene human ERGIC-53, which when mutated leads to deficiency of coagulation factors V/VIII (OMIM:227300). Detailed description: none available
266842	WBGene00003818	H15N14.2	Q09EE7	26	10.224	10	6	0.113	23120	2.16263	VPTLLNMMEGLALNLYR	GILLFGPPGTGK	12	6	0.113	23662	2.53571	AAAAASGASNTDSSATKPK	VISPEDTVGFSESAK	2.34917	WBGene00003818	nsf-1	H15N14.2a	Concise description: none available Provisional description: none available Detailed description: none available
176353	WBGene00008167	C48B4.1	acox-5	20	10.2187	6	3	0.052	23120	1.29758	CFAFNTAAATVR	LIQDGDNQDLTDER	9	5	0.091	23662	1.90178	AVVTHQASQSIDQAR	CFAFNTAAATVR	1.59968	WBGene00008167	C48B4.1	C48B4.1	Concise description: none available Provisional description: none available Detailed description: none available
181046	WBGene00016535	C39D10.8	C39D10.8	15	10.1686	5	3	0.298	23120	1.08131	VYSDTVFADDYEGLLK	TQNCNVDDYAAK	4	3	0.298	23662	0.845237	VYSDTVFADDYEGLLK	TQNCNVDDYAAK	0.963274	WBGene00016535	C39D10.8	C39D10.8a	Concise description: none available Provisional description: none available Detailed description: none available
177856	WBGene00008149	C47E12.4	Q18680	22	10.1288	16	7	0.445	23120	3.46021	GDNDPIDVIEVGSK	VLGTLALIDEGETDWK	15	6	0.411	23662	3.16964	VLGTLALIDEGETDWK	VPEAVHQGTDEAAATAIGATPEHGANAPLPGDVDK	3.31493	WBGene00008149	pyp-1	C47E12.4a	Concise description: pyp-1 encodes, by alternative splicing, three isoforms of an inorganic pyrophosphatase required for embryonic and larval viability, intestinal function, and distal tip cell migration; PYP-1 is catalytically active in vitro, and is expressed in neurons, intestine, and coelomocytes; PYP-1 is orthologous to Drosophila NURF-38, and to human PPA1 (OMIM:179030) and PPA2; by ortholo…
174318	WBGene00000377	T05C12.7	P41988	55	10.1263	19	12	0.26	23120	4.109	IIGPDADFFGELVVDAAEAVR	GYALNCTVASQAMPLR	19	11	0.277	23662	4.01488	IIGPDADFFGELVVDAAEAVR	MASAGDSILALTGK	4.06194	WBGene00000377	cct-1	T05C12.7	Concise description: cct-1 encodes a putative alpha subunit of the eukaryotic cytosolic ('T complex') chaperonin, orthologous to human TCP1 (OMIM:186980), and required for normal pronuclear-centrosome rotation, positioning of the mitotic spindle, meiosis, and distal tip cell migration; CCT-1 is also required to repress SKN-1-dependent transcription of gst-4, and for fertility and viability; CCT-1…
171860	WBGene00022119	Y71F9AL.17	Q9N4H7	29	10.1138	34	19	0.181	23120	7.35294	VASNSDGTTEAACVK	DATPVEVPIDNSDYK	32	15	0.157	23662	6.7619	VASNSDGTTEAACVK	NDDGLQLFDVQQK	7.05742	WBGene00022119	Y71F9AL.17	Y71F9AL.17	Concise description: Y71F9AL.17 encodes an alpha subunit of the coatomer (COPI) complex; in mass RNAi assays, Y71F9AL.17 is required for embryonic viability, fertility, normal locomotion, and normally rapid growth. Provisional description: Y71F9AL.17 encodes an alpha subunit of the coatomer (COPI) complex; in mass RNAi assays, Y71F9AL.17 is required for embryonic viability, fertility, normal loco…
181786	WBGene00002272	C16H3.2	G5EC10	16	9.9753	5	3	0.236	23120	1.08131	LPFESIQAINLEGK	VHINNVQYSQFH	6	4	0.293	23662	1.26786	LPFESIQAINLEGK	VHINNVQYSQFH	1.17458	WBGene00002272	lec-9	C16H3.2	Concise description: lec-9 encodes a predicted lectin that affects embryonic viability. Provisional description: lec-9 encodes a predicted lectin that affects embryonic viability. Detailed description: none available
174680	WBGene00006530	F44F4.11	G5EDD4	38	9.9689	97	21	0.475	23120	20.9775	FDGALNVDLNEFQTNLVPYPR	AYHEALSVNDITNSCFEPANQMVK	100	23	0.507	23662	21.1309	AYHEALSVNDITNSCFEPANQMVK	FDGALNVDLNEFQTNLVPYPR	21.0542	WBGene00006530	tba-4	F44F4.11	Concise description: tba-4 encodes a member of the alpha tubulin family that also includes tba-1, tba-2, and tba-3, and affects embryonic viability. Provisional description: tba-4 encodes a member of the alpha tubulin family that also includes tba-1, tba-2, and tba-3, and affects embryonic viability. Detailed description: none available
171792	WBGene00021466	Y39G10AR.8	Q95XR0	36	9.7842	13	7	0.196	23120	2.81142	VGVDNLNPLTEEVISR	SFDVNKPGSEVENLK	15	7	0.198	23662	3.16964	VGVDNLNPLTEEVISR	SFDVNKPGSEVENLK	2.99053	WBGene00021466	Y39G10AR.8	Y39G10AR.8	Concise description: none available Provisional description: none available Detailed description: none available
175836	WBGene00016201	C28H8.11	Q09474	33	9.7185	21	12	0.328	23120	4.54152	QGTGGSSGYMYLR	YLTPASGFQSLQFR	23	12	0.303	23662	4.86011	QGTGGSSGYMYLR	YLTPASGFQSLQFR	4.70082	WBGene00016201	tdo-2	C28H8.11a	Concise description: none available Provisional description: none available Detailed description: none available
172302	WBGene00020383	T09B4.9	O02161	19	9.6911	8	5	0.141	23120	1.7301	NFSESNTYYHK	VVEGDPDNPKR	7	4	0.108	23662	1.47916	IDANFDKQEWLR	VVEGDPDNPKR	1.60463	WBGene00020383	T09B4.9	T09B4.9	Concise description: none available Provisional description: none available Detailed description: none available
180324	WBGene00004203	Y113G7B.23	G5EF87	23	9.6409	14	8	0.112	23120	3.02768	SLVAQLVETQMK	MDTNTNDDVPSTTEAK	11	8	0.107	23662	2.3244	GVQAAAASCLAAAAVK	MDTNTNDDVPSTTEAK	2.67604	WBGene00004203	swsn-1	Y113G7B.23a	Concise description: swsn-1 encodes an ortholog of SWI3, a component of the SWI/SNF complex that is conserved from yeast to mammals and that is involved in chromatin remodeling; swsn-1 is probably required during mitosis of the T cells for asymmetric cell division, and in addition, is required for embryonic and larval development, as well as normal levels of fertility; swsn-1 exhibits strong gene…
176448	WBGene00011561	T07C4.5	Q22288	18	9.6217	7	4	0.392	23120	1.51384	DTLDPDDKLASMQSNK	EGEFSLTGSDDEITSISPYLIITHNCNVK	9	4	0.392	23662	1.90178	DTLDPDDKLASMQSNK	EGEFSLTGSDDEITSISPYLIITHNCNVK	1.70781	WBGene00011561	ttr-15	T07C4.5	Concise description: none available Provisional description: none available Detailed description: none available
175107	WBGene00010759	K10H10.2	O45679	19	9.5194	9	7	0.264	23120	1.94637	IAFNMIDTAEK	VEYMNPACSVK	6	4	0.151	23662	1.26786	IAFNMIDTAEK	IQGMGTGMIPDILDLTLFSEALR	1.60712	WBGene00010759	cysl-2	K10H10.2	Concise description: cysl-2 encodes a homolog of sulfhydrylases/cysteine synthases. Provisional description: cysl-2 encodes a homolog of sulfhydrylases/cysteine synthases. Detailed description: none available
175972	WBGene00004462	F57B9.10	Q20938	30	9.4638	29	14	0.4	23120	6.27163	DFQVAFGSFPQELQMDPVVR	VMLDLPDEVNSLLSAK	23	12	0.343	23662	4.86011	DFQVAFGSFPQELQMDPVVR	YTQALPLAADLIR	5.56587	WBGene00004462	rpn-6.1	F57B9.10a	Concise description: rpn-6.1 encodes a non-ATPase subunit of the 19S regulatory complex of the proteasome that affects adult viability, larval viability, embryonic viability, fertility, and osmoregulation. Provisional description: rpn-6.1 encodes a non-ATPase subunit of the 19S regulatory complex of the proteasome that affects adult viability, larval viability, embryonic viability, fertility, and…
177027	WBGene00021427	Y38F2AR.9	Y38F2AR.9	16	9.4526	5	3	0.37	23120	1.08131	KGGAAAAPAR	FYTEDSTGLK	5	2	0.247	23662	1.05655	KGGAAAAPAR	FYTEDSTGLK	1.06893	WBGene00021427	Y38F2AR.9	Y38F2AR.9	Concise description: none available Provisional description: none available Detailed description: none available
174289	WBGene00006724	C08B11.7	Q09444	18	9.4056	7	5	0.184	23120	1.51384	LVGLVDNAYQAAK	ELPLEVAEFQK	6	4	0.159	23662	1.26786	LVGLVDNAYQAAK	ELPLEVAEFQK	1.39085	WBGene00006724	ubh-4	C08B11.7	Concise description: none available Provisional description: none available Detailed description: none available
3565201	WBGene00011409	T04A8.7	T04A8.7	14	9.3575	3	2	0.032	23120	0.648789	QFGLNVQPDNSVK	YGVFLDYQR	3	2	0.032	23662	0.633928	QFGLNVQPDNSVK	YGVFLDYQR	0.641359	WBGene00011409	T04A8.7	T04A8.7a	Concise description: T04A8.7 is orthologous to human GLUCOSIDASE, ACID BETA (GBA; OMIM:606463), which when mutated leads to Gaucher disease. Provisional description: T04A8.7 is orthologous to human GLUCOSIDASE, ACID BETA (GBA; OMIM:606463), which when mutated leads to Gaucher disease. Detailed description: none available
177390	WBGene00001853	Y73B6BL.9	P15796	21	9.2284	7	4	0.147	23120	1.51384	IAKPAAK	YITANYK	9	4	0.11	23662	1.90178	ALVQSVGNGASGR	IAKPAAK	1.70781	WBGene00001853	hil-2	Y73B6BL.9a	Concise description: none available Provisional description: none available Detailed description: none available
178113	WBGene00003920	M117.2	N1NV25	68	9.1472	38	12	0.48	23120	8.21799	QAFDDAIAELDTLNEDSYK	VEQELNDICQDVLK	53	16	0.556	23662	11.1994	QAFDDAIAELDTLNEDSYKDSTLIMQLLR	VKVEQELNDICQDVLK	9.7087	WBGene00003920	par-5	M117.2	Concise description: PAR-5 encodes one of two C. elegans 14-3-3 proteins; par-5 is essential for early embryonic development, particularly for early embryonic asymmetry; PAR-5 also functions in a Wnt/MAPK signaling pathway to regulate the nuclear level of the POP-1/TCF transcription factor; PAR-5 has been shown to physically interact with a number of proteins, including those involved in G protei…
178583	WBGene00001564	C05E4.9	Q10663	46	9.0944	90	33	0.401	23120	19.4637	DWYAPIVADAEAGFGGALNCFELMK	LQSAEEAQLWADVFK	85	37	0.432	23662	17.9613	LWQLLHTEPFVPALGAQTGNQAVQMVR	DWYAPIVADAEAGFGGALNCFELMK	18.7125	WBGene00001564	icl-1	C05E4.9a	Concise description: icl-1 encodes a predicted isocitrate lyase/malate synthase, an enzyme known to function in the glyoxylate cycle; ICL-1 was identified in a screen for proteins that interact with GEX-3, a homolog of human HEM-2 which is required for embryonic development; ICL-1 is required for embryonic morphogenesis and appears to act downstream of DAF-16 to influence lifespan. Provisional de…
173466	WBGene00017874	F28A10.6	Q95YB2	25	9.088	15	8	0.24	23120	3.24394	DVEDVLEAAHQFAK	INIASCSLGAAQR	17	8	0.24	23662	3.59226	DVEDVLEAAHQFAK	INIASCSLGAAQR	3.4181	WBGene00017874	acdh-9	F28A10.6	Concise description: none available Provisional description: none available Detailed description: none available
173360	WBGene00001488	ZK270.2	G5EEP9	26	9.0696	20	9	0.023	23120	4.32526	TTGYPETSEAYTGELDTTDR	TEPEAEIVDVPVVK	20	9	0.021	23662	4.22619	TTGYPETSEAYTGELDTTDR	TEPEAEIVDVPVVK	4.27573	WBGene00001488	frm-1	ZK270.2a	Concise description: none available Provisional description: none available Detailed description: none available
172895	WBGene00013859	ZC247.1	ZC247.1	20	9.0641	6	2	0.009	23120	1.29758	LPEHVIPVVIEETEK	ADNLNDIPLSHEVTSYPTEFSYEK	8	5	0.024	23662	1.69047	LPEHVIPVVIEETEK	ADNLNDIPLSHEVTSYPTEFSYEK	1.49402	WBGene00013859	ZC247.1	ZC247.1	Concise description: none available Provisional description: none available Detailed description: none available
180987	WBGene00018522	F46H5.7	F46H5.7	17	8.9874	7	4	0.082	23120	1.51384	QQLQEANWYANER	VGELESSVALQR	4	2	0.037	23662	0.845237	VGELESSVALQR	LGLANNSIR	1.17954	WBGene00018522	F46H5.7	F46H5.7a	Concise description: none available Provisional description: none available Detailed description: none available
173843	WBGene00019890	R05F9.6	R05F9.6	25	8.9767	17	9	0.262	23120	3.67647	VAVADNFQYTDPVDGSVATK	LYVDSYIPSNDTSR	18	9	0.213	23662	3.80357	VAVADNFQYTDPVDGSVATK	LYVDSYIPSNDTSR	3.74002	WBGene00019890	R05F9.6	R05F9.6	Concise description: none available Provisional description: none available Detailed description: none available
172259	WBGene00018008	F33D11.11	O44782	22	8.9632	11	7	0.465	23120	2.37889	NEDSFASSGQAQELGSSYSGTPSHDGTVNSLR	QITVMLQPLEGIPSDAGR	12	6	0.392	23662	2.53571	NEDSFASSGQAQELGSSYSGTPSHDGTVNSLR	STVDEKEELQK	2.4573	WBGene00018008	vpr-1	F33D11.11	Concise description: vpr-1 encodes the C. elegans VAP (VAMP-associated protein) ortholog, a transmembrane protein containing an N-terminal extracellular major sperm protein (MSP) domain; loss of vpr-1 function during development indicates that vpr-1 is required, both in vab-1-dependent and vab-1-independent pathways, for proper distal tip cell migration during somatic gonad development, ventral h…
172034	WBGene00000140	ZK973.6	Q9N4M4	51	8.9445	149	54	0.072	23120	32.2232	AVAPSSLISHDDLVVGLPEK	HNAEAVPTQYAPK	177	57	0.078	23662	37.4017	AVAPSSLISHDDLVVGLPEK	AVIANAPSSDAHVQQLEQAVATAETLIPDLEER	34.8124	WBGene00000140	anc-1	ZK973.6	Concise description: anc-1 encodes a protein, orthologous to Drosophila MSP 300 and mammalian SYNE1 and SYNE2 proteins; ANC-1 has coiled regions, a nuclear envelope localization domain (the KASH domain) and an actin-binding domain; ANC-1 affects the positioning of nuclei and mitochondria within the cytoskeleton; ANC-1 is expressed in the cytoplasm, but is localized to the nuclear periphery in an …
180596	WBGene00018701	F52E4.1	Q8WQF1	38	8.9365	45	17	0.446	23120	9.73183	AVTNEEVTQEELGGAK	GDINYAWPTAEVAVMGAK	44	17	0.433	23662	9.29761	AVTNEEVTQEELGGAK	DTSYLFITGPDVVK	9.51472	WBGene00018701	pccb-1	F52E4.1a	Concise description: F52E4.1 is orthologous to the human gene PROPIONYL-CoA CARBOXYLASE, BETA SUBUNIT (PCCB; OMIM:232050), which when mutated leads to propionicacidemia; F52E4.1 protein is predicted to be mitochondrial. Provisional description: F52E4.1 is orthologous to the human gene PROPIONYL-CoA CARBOXYLASE, BETA SUBUNIT (PCCB; OMIM:232050), which when mutated leads to propionicacidemia; F52E4…
172556	WBGene00011232	R11A5.4	Q7JKI3	53	8.8618	203	53	0.815	23120	43.9014	GIFICDGSQHEADELIDK	KFLDEQVGEDLPEPVR	195	51	0.794	23662	41.2053	GIFICDGSQHEADELIDK	KFLDEQVGEDLPEPVR	42.5534	WBGene00011232	pck-2	R11A5.4a	Concise description: R11A5.4 is one of three C. elegans genes that encode proteins with similarity to phosphoenolpyruvate carboxykinase (PEPCK); by similarity, the products of R11A5.4 are predicted to function in gluconeogenesis. Provisional description: R11A5.4 is one of three C. elegans genes that encode proteins with similarity to phosphoenolpyruvate carboxykinase (PEPCK); by similarity, the p…
178130	WBGene00014095	ZK829.4	Q23621	70	8.8585	343	52	0.694	23120	74.1782	VIGIQEYDCAVYNPDGIHPK	AATLDAHSQVLDEQKPMEEQVNPSFYK	351	57	0.785	23662	74.1696	SAATLDAHSQVLDEQKPMEEQVNPSFYK	KGFLGPGVDVPAPDMGTGER	74.1739	WBGene00014095	gdh-1	ZK829.4	Concise description: gdh-1 encodes a glutamate dehydrogenase, required in mass RNAi assays for normal fertility and rapid growth, that is expressed in larval and adult pharynx, intestine, and rectal gland cells; GDH-1 is orthologous to human GLUD1 (OMIM:138130, mutated in hyperinsulinemic hypoglycemia and hyperammonemia) and GLUD2 (OMIM:300144). Provisional description: gdh-1 encodes a glutamate …
175571	WBGene00011111	R07E5.3	Q21831	3	8.7442	5	3	0.079	23120	1.08131	NAEEGEDLVPIR	AAGAAPSTPR								0.540655	WBGene00011111	snfc-5	R07E5.3	Concise description: snfc-5 encodes a homolog of SNF5/Ini1, a component of the SWI/SNF complex that is conserved from yeast to mammals and that is involved in chromatin remodeling; snfc-5 may be involved in asymmetric cell division of the T cells. Provisional description: R07E5.3(RNAi) animals have 100 percentage embryonic lethality; R07E5.3(zygotic RNAi) animals with rde-1 mutations (resistant t…
173656	WBGene00021292	Y25C1A.5	Q9TYL9	30	8.6865	25	13	0.17	23120	5.40657	FPDVASTIVPVLMEFLSDTNEK	IDIMDYIVPGNVTDTEFR	32	12	0.158	23662	6.7619	FPDVASTIVPVLMEFLSDTNEK	LVDKPTPVTLAPNDFSNIK	6.08423	WBGene00021292	copb-1	Y25C1A.5	Concise description: Y25C1A.5 encodes a beta subunit of the coatomer (COPI) complex; in mass RNAi assays, Y25C1A.5 is required for fertility, adult viability, osmoregulation, and general health. Provisional description: Y25C1A.5 encodes a beta subunit of the coatomer (COPI) complex; in mass RNAi assays, Y25C1A.5 is required for fertility, adult viability, osmoregulation, and general health. Detai…
181279	WBGene00009813	F47B10.2	Q20502	15	8.6407	3	2	0.027	23120	0.648789	KQEEIDNAR	TPTGIVQDR	4	2	0.022	23662	0.845237	VLEMLR	KQEEIDNAR	0.747013	WBGene00009813	haly-1	F47B10.2	Concise description: F47B10.2 encodes a histidine ammonia lyase orthologous to the human gene HISTIDASE (HAL; OMIM:235800); F47B10.2 is required in C. elegans for conversion of histidine to urocanic acid via reductive deamination; loss-of-function mutations in F47B10.2 results in protection against zinc and nickel toxicity owing to increased levels of metal-chelating histidine; genetic studies su…
180818	WBGene00016103	C25F6.3	Q18164	21	8.6382	15	9	0.111	23120	3.24394	VVVLGAGDTAMDCATSALR	AYIGGLSSAEIPQFR	5	4	0.048	23662	1.05655	AYIGGLSSAEIPQFR	AVPEEMEAAKEEK	2.15024	WBGene00016103	dpyd-1	C25F6.3	Concise description: dpyd-1 encodes the C. elegans ortholog of human DihydroPYrimidine Dehydrogenase (DPYD), which when mutated leads to thymine-uraciluria (OMIM:274270); DPYD-1 is the first and rate-limiting enzyme for uracil and thymine metabolism to 5,6-dihydrouracil and 5,6-dihydrothymine, respectively, and in humans, functions in metabolism of the anti-cancer pyrimidine antagonist 5-fluorour…
173971	WBGene00004267	C18A3.6	I7F488	3	8.6376								5	3	0.169	23662	1.05655	TYSWENAQVVLVGNK	MAESLDKDPQQQPK	0.528275	WBGene00004267	rab-3	C18A3.6a	Concise description: rab-3 encodes a rab3 homolog, a member of the Ras GTPase superfamily, and affects sensitivity to aldicarb and the distribution of synaptic vesicle populations and thereby affects synaptic transmission, track amplitude and speed of movement, chemotaxis to isoamyl alcohol, affects pharyngeal pump durations, and may only slightly affect male mating behavior; requires aex-3 for l…
178293	WBGene00001394	W02A2.1	A0A061AJ35	18	8.5391	5	3	0.09	23120	1.08131	ALEPLKDTQYGYK	VPELPSVAAVK	6	4	0.106	23662	1.26786	ALEPLKDTQYGYK	VPELPSVAAVK	1.17458	WBGene00001394	fat-2	W02A2.1	Concise description: fat-2 encodes a delta-12 fatty acyl desaturase that increases membrane fluidity when expressed in yeast, and that may protect against cold stress; FAT-2's substrate is unknown, but may be acyl-CoA; FAT-2 is required in vivo for normal levels of C18 or C20 polyunsaturated fatty acids (PUFAs); FAT-2 is fully required for a sperm-attracting cue (perhaps an eicosanoid) secreted b…
176957	WBGene00003806	Y77E11A.13	Q9N4A7	23	8.5375	13	8	0.297	23120	2.81142	IWAFDDATNEWILEK	DAIHDAQLNIYGSR	10	7	0.272	23662	2.11309	IWAFDDATNEWILEK	DAIHDAQLNIYGSR	2.46225	WBGene00003806	npp-20	Y77E11A.13a	Concise description: none available Provisional description: none available Detailed description: none available
175588	WBGene00000380	C07G2.3	Q8WQG4	43	8.4893	6	5	0.131	23120	1.29758	LVETAQTSLGSK	EQISLATQVVR	6	4	0.101	23662	1.26786	ALETLDSISDKFPVENR	SHILAAR	1.28272	WBGene00000380	cct-5	C07G2.3a	Concise description: cct-5 encodes, by alternative splicing, two isoforms of a putative epsilon subunit of the eukaryotic cytosolic ('T complex') chaperonin, orthologous to human CCT5 (OMIM:610150, mutated in sensory neuropathy with spastic paraplegia); CCT-5 represses SKN-1-dependent transcription of gst-4; in mass RNAi assays, cct-5 is required for normal embryonic osmotic integrity, transgene …
259839	WBGene00006789	F11C3.3	P02566	70	8.4481	320	102	0.527	23120	69.2042	HTDAVAELTDQLDQLNK	DLEEANMNHENQLGGLR	311	97	0.516	23662	65.7172	HTDAVAELTDQLDQLNK	DLEEANMNHENQLGGLR	67.4607	WBGene00006789	unc-54	F11C3.3	Concise description: unc-54 encodes a muscle myosin class II heavy chain (MHC B); UNC-54 is the major myosin heavy chain expressed in C. elegans and is required for locomotion and egg-laying; in vivo and in vitro, UNC-54 interacts with ITR-1, an IP3 receptor, and this interaction may provide a link between calcium signaling and the muscle cytoskeleton; UNC-54 is a thick filament component that is…
177921	WBGene00006779	K11E8.1	F5GUA9	24	8.423	10	6	0.106	23120	2.16263	VTQTLLDAISCK	ADGATGIVSSSNSSTASK	7	3	0.129	23662	1.47916	ADGATGIVSSSNSSTASK	ESSESSQTIDDNDSEK	1.82089	WBGene00006779	unc-43	K11E8.1a	Concise description: unc-43 encodes the C. elegans ortholog of type II calcium/calmodulin-dependent protein kinase (CaMKII); unc-43 activity is required for a number of processes, including locomotion, neuronal cell fate specification and regulation of synaptic density, egg laying, defecation, and meiotic maturation; in regulating some of these processes, unc-43 acts in concert with MAPKKK and G …
173842	WBGene00001755	F11G11.2	P91253	46	8.3853	74	17	0.888	23120	16.0035	QILAYAGQDFEDNRIPK	CAWEEAQVNSVADQFK	71	19	0.922	23662	15.003	QILAYAGQDFEDNRIPK	CAWEEAQVNSVADQFK	15.5032	WBGene00001755	gst-7	F11G11.2	Concise description: gst-7 encodes a predicted glutathione S-transferase. Provisional description: gst-7 encodes a predicted glutathione S-transferase. Detailed description: none available
179971	WBGene00000915	C47E8.5	Q18688	65	8.3677	211	53	0.635	23120	45.6315	LVSSPCCIVTSEYGWSANMER	MKENQTQIYYITGESK	211	55	0.689	23662	44.5863	LVSSPCCIVTSEYGWSANMER	LGLDIGDDEIEDSAVPSSCTAEAK	45.1089	WBGene00000915	daf-21	C47E8.5	Concise description: daf-21 encodes a member of the Hsp90 family of molecular chaperones; DAF-21 activity is required for larval development, negative regulation of dauer larva formation, and a number of specific chemosensory behaviors, such as the response to chemicals and odorants detected by the ASE and AWC sensory neurons; a daf-21 sensory defect can be rescued by a cyclic GMP analogue, sugge…
181410	WBGene00006493	R09A8.3	Q21854	29	8.3643	21	14	0.192	23120	4.54152	VDQFIVDNFDSIVNDSK	AEHSIDLLTCK	20	13	0.18	23662	4.22619	VDQFIVDNFDSIVNDSK	AEHSIDLLTCK	4.38385	WBGene00006493	tag-147	R09A8.3	Concise description: none available Provisional description: none available Detailed description: none available
176434	WBGene00011867	T20G5.1	P34574	49	8.3612	119	50	0.375	23120	25.7353	LHVIEVGTPAAGNTPFQK	FQQCPSTGPGPSPLLQYFGILLDQGK	134	55	0.385	23662	28.3154	LTELEEFIAGPNHAQIGQIGDR	LHVIEVGTPAAGNTPFQK	27.0253	WBGene00011867	chc-1	T20G5.1	Concise description: chc-1 encodes the C. elegans clathrin heavy chain ortholog; loss of chc-1 activity via RNAi results in defects in receptor-mediated yolk endocytosis and thus, embryonic lethality. Provisional description: chc-1 encodes the C. elegans clathrin heavy chain ortholog; loss of chc-1 activity via RNAi results in defects in receptor-mediated yolk endocytosis and thus, embryonic leth…
176814	WBGene00010665	K08E3.5	K08E3.5	42	8.3223	61	24	0.538	23120	13.192	NDLTFLDLTMQQIQTLNK	TYGVDVPLVLMNSFNTNEDTQK	64	22	0.414	23662	13.5238	NDLTFLDLTMQQIQTLNK	TYGVDVPLVLMNSFNTNEDTQK	13.3579	WBGene00010665	K08E3.5	K08E3.5a	Concise description: none available Provisional description: none available Detailed description: none available
186251	WBGene00001932	F54E12.4	Q27876	12	8.308								38	11	0.537	23662	8.02975	AMSIMNSFVNDVFER	NSFVNDVFER	4.01487	WBGene00001932	his-58	F54E12.4	Concise description: his-58 encodes an H2B histone. Provisional description: his-58 encodes an H2B histone. Detailed description: none available
178711	WBGene00017501	F15E11.15	G5EEV5	32	8.2643	22	8	0.616	23120	4.75779	IYYNTGFFTTGVDNWK	SVTTFNTLGENILPFSQNPQK	23	8	0.616	23662	4.86011	IYYNTGFFTTGVDNWK	VFQTEVQFISPSGR	4.80895	WBGene00017501	F15E11.15	F15E11.15a	Concise description: none available Provisional description: none available Detailed description: none available
174924	WBGene00001793	Y46G5A.31	Q9U2D9	26	8.2549	12	6	0.101	23120	2.59516	AQISTEELGDQYCMFGPMK	VILFDLGSGAVK	13	6	0.101	23662	2.74702	AQISTEELGDQYCMFGPMK	TSLFNKPEDR	2.67109	WBGene00001793	gsy-1	Y46G5A.31	Concise description: gsy-1 is orthologous to the human gene GLYCOGEN SYNTHASE 1 (GYS1; OMIM:138570); deficiencies of GYS1 may be associated with susceptibility to type 2 diabetes. Provisional description: gsy-1 is orthologous to the human gene GLYCOGEN SYNTHASE 1 (GYS1; OMIM:138570); deficiencies of GYS1 may be associated with susceptibility to type 2 diabetes. Detailed description: none available
175519	WBGene00006537	C36E8.5	P52275	57	8.2073	195	37	0.731	23120	42.1713	LTNPTYGDLNHLVSLTMSGVTTCLR	FWEVISDEHGIQPDGTFK	200	38	0.796	23662	42.2619	LTNPTYGDLNHLVSLTMSGVTTCLR	GHYTEGAELVDNVLDVIR	42.2166	WBGene00006537	tbb-2	C36E8.5	Concise description: tbb-2 encodes a homolog of mammalian beta-tubulin (TUBB) that is expressed at high levels in the germline; TBB-2 is redundant for embryonic viability, due to its paralog TBB-1; however, unlike its paralog TBB-1 it is preferred for normal microtubule severing by the katanin complex MEI-1/MEI-2; TBB-2 is required together with TBB-1, TBA-1, and tba-2 to make spindle structures …
171774	WBGene00003799	Y37E3.15	Q9BKT9	19	8.1976	4	2	0.015	23120	0.865052	LDSELK	FKEVQK	3	1	0.015	23662	0.633928	LDSELK	NA	0.74949	WBGene00003799	npp-13	Y37E3.15a	Concise description: none available Provisional description: none available Detailed description: none available
180125	WBGene00013606	Y102A5A.1	G5ED41	25	8.1699	12	9	0.086	23120	2.59516	VDVLDLIGEVLLR	SAYHVGQLVDK	13	8	0.069	23662	2.74702	MSAYHVGQLVDK	VDVLDLIGEVLLR	2.67109	WBGene00013606	cand-1	Y102A5A.1	Concise description: cand-1 encodes the ortholog of the human and metazoan CAND1 (cullin-associated and neddylation-dissociated) protein which contains multiple HEAT repeats and binds to the cullin-Rbx1 dimeric complex; cand-1 can physically bind all six cullins in C. elegans and negatively regulates the neddylation of CUL-2 and CUL-4, suggesting that CAND-1 promotes cullin stability, however cul…
176925	WBGene00021930	Y55F3AM.13	Y55F3AM.13	23	8.0821	11	5	0.175	23120	2.37889	AEQILAGSCDQSFVTR	SAGAASSAPGVPGAPAK	9	3	0.116	23662	1.90178	AEQILAGSCDQSFVTR	SAGAASSAPGVPGAPAK	2.14033	WBGene00021930	Y55F3AM.13	Y55F3AM.13	Concise description: Y55F3AM.13 encodes a protein with no obvious motifs or non-nematode homologs, and with no obvious function in mass RNAi assays; Y55F3AM.13 shares N-terminal UNC-13 binding, and thus may share at least some functions, with ERI-1, FBXA-153, and W04D2.6. Provisional description: Y55F3AM.13 encodes a protein with no obvious motifs or non-nematode homologs, and with no obvious fun…
179411	WBGene00007429	C08B6.8	C08B6.8	24	8.0647	13	7	0.269	23120	2.81142	NTFHENGLMEK	NTFHENGLMEK	12	7	0.275	23662	2.53571	NTFHENGLMEK	EVLDNMEEWPR	2.67356	WBGene00007429	C08B6.8	C08B6.8a	Concise description: none available Provisional description: none available Detailed description: none available
187645	WBGene00001784	R07B1.4	Q09607	71	8.0543	301	39	0.914	23120	65.0952	LIDYGSPDALDAYPHILALINR	LDMIAEVIQEFMSSSGMGK	289	44	0.914	23662	61.0684	LIDYGSPDALDAYPHILALINR	LDMIAEVIQEFMSSSGMGK	63.0818	WBGene00001784	gst-36	R07B1.4	Concise description: none available Provisional description: none available Detailed description: none available
179077	WBGene00006803	K11C4.3	G5EG85	31	8.0253	26	16	0.073	23120	5.62284	DIAAIGEQVAQIER	EQEQVLSSTDTGR	21	16	0.068	23662	4.43749	HQAFQSELAANK	EQEQVLSSTDTGR	5.03017	WBGene00006803	unc-70	K11C4.3a	Concise description: unc-70 encodes two isoforms of a beta-spectrin ortholog required for normal body curvature and shape, normal movement, and correct localization of the alpha-spectrin SPC-1; the predominant UNC-70 isoform is expressed in all embryonic cells except the intestine, at the plasma membrane at sites of intercellular contact; UNC-70 becomes largely restricted to muscles and neurons f…
176771	WBGene00012097	T27E9.7	G5EFG4	31	7.9945	20	11	0.201	23120	4.32526	AAEILHGLGFTK	QLVYYGGNYDQFVK	22	13	0.232	23662	4.6488	AAEILHGLGFTK	QLVYYGGNYDQFVK	4.48703	WBGene00012097	abcf-2	T27E9.7	Concise description: none available Provisional description: none available Detailed description: none available
181776	WBGene00003369	C36E6.3	P19625	38	7.9878	53	13	0.782	23120	11.4619	LTGTDPEATIIGAFAMFDK	DLYASMGQIAPDSQIDAMIK	52	14	0.782	23662	10.9881	LTGTDPEATIIGAFAMFDK	EASGPINFTVFLTLFGER	11.225	WBGene00003369	mlc-1	C36E6.3	Concise description: mlc-1 encodes a muscle regulatory myosin light chain that is nearly identical to MLC-2 and functions redundantly with MLC-2 in the body-wall and in pharyngeal muscle to affect L1 larval viability, elongation, and pharyngeal and body-wall muscle development, and also affects locomotion and growth; expressed in the body-wall muscles, pharyngeal muscles, and vulval muscles. Prov…
174786	WBGene00004468	ZK20.5	Q23449	24	7.9656	13	5	0.184	23120	2.81142	IEQSLMEGAYNK	EQTSNAYISTPVR	12	4	0.168	23662	2.53571	IEQSLMEGAYNK	EQTSNAYISTPVR	2.67356	WBGene00004468	rpn-12	ZK20.5	Concise description: rpn-12 is predicted to encode a non-ATPase subunit of the 19S regulatory complex of the proteasome that interacts with NHR-6 in yeast two-hybrid assays. Provisional description: rpn-12 is predicted to encode a non-ATPase subunit of the 19S regulatory complex of the proteasome that interacts with NHR-6 in yeast two-hybrid assays. Detailed description: none available
176979	WBGene00019537	K08D12.3	K08D12.3	37	7.8978	13	3	0.219	23120	2.81142	CYQCQETGHISR	CQQPGHISR	14	5	0.417	23662	2.95833	GGGGGSTCYNCQETGHFSR	CYQCQETGHISR	2.88488	WBGene00019537	K08D12.3	K08D12.3a	Concise description: K08D12.3 is orthologous to human ZNF9 (CNBP; OMIM:116955, mutated in myotonic dystrophy type 2) and ZCCHC13; like ZNF9, K08D12.3 is most conspicuously expressed in muscle cells; K08D12.3 is required for normal locomotion in mass RNAi assays, as well as for fertility, embryonic and larval viability, and general health. Provisional description: K08D12.3 is orthologous to human …
3564838	WBGene00002263	K08H10.1	G5EFU3	27	7.894	14	8	0.074	23120	3.02768	LKEPAQNTADNAK	TGEALNDNYESVK	11	7	0.067	23662	2.3244	AGDAISGAYDSVK	LKEPAQNTADNAK	2.67604	WBGene00002263	lea-1	K08H10.1a	Concise description: The lea-1 gene encodes a protein that is predicted to be hydrophilic and heat-resistant, and that might participate in anhydrobiosis. Provisional description: LEA-1 belongs to a class of proteins known as LEA (for 'late embryogenesis abundant') proteins: such proteins accumulate in response to drought in many plants, and one such protein is induced in Aphelenchus avenae nemat…
181044	WBGene00001169	R03G5.1	G8JY74	72	7.8734	287	41	0.665	23120	62.0675	SGDAGIVELIPTKPLCVESFTDYAPLGR	SGDAGIVELIPTKPLCVESFTDYAPLGR	293	39	0.665	23662	61.9136	SGDAGIVELIPTKPLCVESFTDYAPLGR	AVPFVPISGFNGDNMLEVSSNMPWFK	61.9905	WBGene00001169	eef-1A.2	R03G5.1a	Concise description: eft-4 encodes a translation elongation factor 1-alpha homolog that is required for embryonic viability, fertility, and a normal postembryonic growth rate; eft-4 encodes at least one alternatively spliced coding sequence identical to that of eft-3. Provisional description: Paralogs are encoded by H19N07.1, K07A12.4, and other genes. Detailed description: none available
3565680	WBGene00009221	F28F8.2	O18693	3	7.8256	4	3	0.047	23120	0.865052	ESEFPLTISGK	NETLGQTLR								0.432526	WBGene00009221	acs-2	F28F8.2	Concise description: acs-2 encodes an acyl-CoA synthetase; by homology, ACS-2 is predicted to catalyze conversion of a fatty acid to Acyl-CoA for subsequent beta oxidation; accordingly, loss of acs-2 activity via RNAi results in defects in fat metabolism; an ACS-2::GFP reporter fusion protein is widely expressed and appears to localize to mitochondria; acs-2 expression is positively regulated by …
190223	WBGene00001774	Y53F4B.29	Q9NAB4	17	7.8161	5	3	0.144	23120	1.08131	ILFHLADVPFEDFR	AEELAK	3	2	0.077	23662	0.633928	AEELAK	IMQSDVVPAR	0.857619	WBGene00001774	gst-26	Y53F4B.29	Concise description: none available Provisional description: none available Detailed description: none available
181689	WBGene00014213	ZK1073.1	ZK1073.1	22	7.8109	8	4	0.163	23120	1.7301	TTLLVVDNVADVMQEAPDK	TLSSSMEEADRPR	11	5	0.197	23662	2.3244	TTLLVVDNVADVMQEAPDK	TLSSSMEEADRPR	2.02725	WBGene00014213	ZK1073.1	ZK1073.1	Concise description: none available Provisional description: none available Detailed description: none available
173277	WBGene00006565	Y63D3A.5	Q9U1W1	24	7.7935	10	5	0.107	23120	2.16263	LLALPSDANFVLK	EAVHDVQK	11	5	0.142	23662	2.3244	LLGALSALDVAQIAEQSNTSVANLSAPK	LLALPSDANFVLK	2.24351	WBGene00006565	tfg-1	Y63D3A.5	Concise description: tfg-1 encodes a tumor suppressor gene homologous to human TRK-fused gene (TFG)(OMIM: 602498); TFG-1 is sufficient and necessary to inhibit the normal apoptotic pathway; TFG-1 influences body size and responsible for determining the size of adults; TFG-1 functions in a novel pathway independent of TGF-&#946; and insulin signaling to control cell growth and size; TFG-1 directly…
179533	WBGene00000063	T04C12.6	P0DM41	71	7.777	284	38	0.779	23120	61.4187	LCYVALDFEQEMATAASSSSLEK	TTGVVLDSGDGVTHTVPIYEGYALPHAILR	266	35	0.779	23662	56.2083	LCYVALDFEQEMATAASSSSLEK	CPEAMFQPSFLGMESAGIHETSYNSIMK	58.8135	WBGene00000063	act-1	T04C12.6	Concise description: act-1 encodes an actin isoform that is required for proper body wall muscle and pharyngeal muscle structures and the motility of animals; actins have highly similar amino acid sequences; ACT-1 is identical to ACT-3; act-1 functions redundantly with two other actin isoforms, act-2 and act-3, to control cytoplasmic microfilament function in the early embryo. Provisional descrip…
180612	WBGene00017892	F28B4.3	F28B4.3	25	7.7678	13	7	0.037	23120	2.81142	QNSDTVNQLIANLK	DNNDMALQR	10	6	0.035	23662	2.11309	QNSDTVNQLIANLK	FLTVNDDILSMPQAR	2.46225	WBGene00017892	F28B4.3	F28B4.3	Concise description: none available Provisional description: none available Detailed description: none available
180081	WBGene00004809	F44G3.6	G5EE67	33	7.6941	10	6	0.377	23120	2.16263	TLFNIENDFSEEER	GLLDVTTQNVANMMK	19	8	0.611	23662	4.01488	GLLDVTTQNVANMMK	TLFNIENDFSEEER	3.08875	WBGene00004809	skr-3	F44G3.6	Concise description: The skr-3 gene encodes a homolog of Skp1 in S. cerevisiae that has no known function in vivo, since skr-3(RNAi) animals are at least superficially normal. Provisional description: Expression of a SKR-3::GFP reporter gene is restricted to the pharynx and intestine. SKR-3 may, like Skp1p, function within a particular SCF ubiquitin-ligase (E3) complex by binding both a cullin (a…
175861	WBGene00020549	T17E9.2	Q95ZN7	21	7.6569	7	2	0.047	23120	1.51384	LLAFIGAVPQTVR	LLLANR	4	3	0.064	23662	0.845237	LLAFIGAVPQTVR	LLLANR	1.17954	WBGene00020549	nmt-1	T17E9.2a	Concise description: none available Provisional description: none available Detailed description: none available
186344	WBGene00010135	F55H12.4	F55H12.4	16	7.6303	3	2	0.125	23120	0.648789	QCAINSGFDTSGVR	QLCNCVAGTGVR	3	2	0.125	23662	0.633928	QLCNCVAGTGVR	QCAINSGFDTSGVR	0.641359	WBGene00010135	F55H12.4	F55H12.4	Concise description: none available Provisional description: none available Detailed description: none available
181758	WBGene00020812	T25G12.5	Q22781	32	7.581	27	12	0.388	23120	5.8391	MIDNPFVASYAVTEPGAGSDVAGVK	KFVADEVIPVAGEYDK	27	13	0.447	23662	5.70535	KFVADEVIPVAGEYDK	MIDNPFVASYAVTEPGAGSDVAGVK	5.77222	WBGene00020812	acdh-7	T25G12.5	Concise description: none available Provisional description: none available Detailed description: none available
175081	WBGene00001971	Y48B6A.14	G5EFV4	39	7.5707	25	6	0.411	23120	5.40657	RYEVDIANYK	YEVDIANYK	18	7	0.495	23662	3.80357	YEVDIANYK	KPGMGVADVAK	4.60507	WBGene00001971	hmg-1.1	Y48B6A.14	Concise description: hmg-1.1 encodes a member of the high mobility group (HMG) family of proteins. Provisional description: hmg-1.1 encodes a member of the high mobility group (HMG) family of proteins. Detailed description: none available
176501	WBGene00006536	K01G5.7	O17921	61	7.5619	191	36	0.719	23120	41.3062	LTNPTYGDLNHLVSLTMSGVTTCLR	FWEVISDEHGIQPDGTFK	193	35	0.784	23662	40.7827	LTNPTYGDLNHLVSLTMSGVTTCLR	GHYTEGAELVDNVLDVIR	41.0444	WBGene00006536	tbb-1	K01G5.7	Concise description: This gene encodes a homolog of mammalian beta-tubulin (TUBB) that is expressed at high levels in the germline; TBB-1 is redundant for embryonic viability, due to its paralog TBB-2. Provisional description: This gene encodes a homolog of mammalian beta-tubulin (TUBB) that is expressed at high levels in the germline; TBB-1 is redundant for embryonic viability, due to its paralo…
181726	WBGene00020146	T01C8.5	Q22067	20	7.5454	7	3	0.086	23120	1.51384	MYLDETAPVK	ANWSNPPAHGAR	7	4	0.108	23662	1.47916	AGAEFLASVCNMK	MYLDETAPVK	1.4965	WBGene00020146	got-1.2	T01C8.5	Concise description: none available Provisional description: none available Detailed description: none available
175284	WBGene00022492	Y119D3B.15	Q95Y72	22	7.5369	11	4	0.768	23120	2.37889	AEGEEDDVNVWEDNWDDETHESEFSK	EFEEEEFEEFPVQEWAER	7	3	0.683	23662	1.47916	EFEEEEFEEFPVQEWAER	AEGEEDDVNVWEDNWDDETHESEFSK	1.92902	WBGene00022492	dss-1	Y119D3B.15	Concise description: dss-1 encodes the C. elegans ortholog of human DSS1 (deleted in split hand/split foot 1) and Saccharomyces cerevisiae SEM1, subunits of the 26S proteasome regulatory particle; in C. elegans, DSS-1 is an essential protein, required for oogenesis and for embryonic and larval development; in addition, dss-1 appears to be required for proper development and/or function of the int…
180028	WBGene00000879	Y75B12B.5	P52011	32	7.4826	25	10	0.538	23120	5.40657	HTGPGVLSMANAGPNTNGSQFFLCTVK	HTGPGVLSMANAGPNTNGSQFFLCTVK	23	9	0.595	23662	4.86011	HTGPGVLSMANAGPNTNGSQFFLCTVK	HTGPGVLSMANAGPNTNGSQFFLCTVK	5.13334	WBGene00000879	cyn-3	Y75B12B.5	Concise description: cyn-3 encodes an abundantly expressed cyclophilin A isoform with peptidyl-prolyl isomerase activity in vitro, which closely resembles the prototypical CypA and is thus likely to be a member of the cytosolic CsA-binding cyclophilin subfamily; cyn-3 is exclusively expressed in the single anterior excretory cell, and is dispensable for viability and gross morphology in mass RNAi…
180992	WBGene00006351	K03A1.5	Q21166	21	7.4624	7	3	0.044	23120	1.51384	AMVHTVGGTLLK	VNHSTGGVEMLGR	4	3	0.04	23662	0.845237	LATSLR	IYAVDDIPYTSSGK	1.17954	WBGene00006351	sur-5	K03A1.5	Concise description: sur-5 encodes a protein with high similarity to H. sapiens Acetoacetyl-coenzyme A synthetase; sur-5 negatively regulates let-60 during vulval induction, based on genetic analysis, and genetically synergises with lin-45 with respect to larval death, uncoordinated movement and egg-laying defects; sur-5 is strongly expressed in most cells of C. elegans, including the VPCs and is…
175598	WBGene00009440	F35G12.2	Q20049	30	7.4587	11	8	0.232	23120	2.37889	ILSAVQAPVDFEVVNLTSK	DLANPTAFIR	6	5	0.159	23662	1.26786	ILSAVQAPVDFEVVNLTSK	VATSPNSDMLR	1.82337	WBGene00009440	idhg-1	F35G12.2	Concise description: F35G12.2 encodes the C. elegans ortholog of mitochondrial NAD+-isocitrate dehydrogenase. Provisional description: F35G12.2 encodes the C. elegans ortholog of mitochondrial NAD+-isocitrate dehydrogenase. Detailed description: none available
176793	WBGene00000067	T25C8.2	O45815	70	7.4247	190	34	0.784	23120	41.09	LCYVAHDFESELAAAASSSSLEK	YPIEHGIVTNWDDMEK	183	32	0.784	23662	38.6696	LCYVAHDFESELAAAASSSSLEK	YPIEHGIVTNWDDMEK	39.8798	WBGene00000067	act-5	T25C8.2	Concise description: an ortholog of human cytoplasmic actin; and is expressed only in microvillous intestinal cells and excretory cell. Provisional description: an ortholog of human cytoplasmic actin; and is expressed only in microvillous intestinal cells and excretory cell. Detailed description: none available
176516	WBGene00000475	Y39A1C.3	G5EDV3	43	7.3904	26	8	0.344	23120	5.62284	TLDDDEPVVFDIVEGLK	LDNLAVDTTNEANDAK	27	8	0.344	23662	5.70535	TLDDDEPVVFDIVEGLK	LDNLAVDTTNEANDAK	5.66409	WBGene00000475	cey-4	Y39A1C.3	Concise description: cey-4 encodes a Y box-containing protein with no known function in vivo; CEY-4 associates with CGH-1 and CEY-2/3 in cytoplasmic particles of the gonad and early embryo. Provisional description: cey-4 encodes a Y box-containing protein with no known function in vivo; CEY-4 associates with CGH-1 and CEY-2/3 in cytoplasmic particles of the gonad and early embryo. Detailed descri…
176495	WBGene00012361	W09D10.3	O18180	18	7.3735	5	2	0.185	23120	1.08131	SQAAGLPLNEGSPAPLPSEDR	KFVETAPVNVK	4	3	0.324	23662	0.845237	SQAAGLPLNEGSPAPLPSEDR	VSSLVEEIANLSLLDVSDLNWALK	0.963274	WBGene00012361	mrpl-12	W09D10.3	Concise description: none available Provisional description: none available Detailed description: none available
180875	WBGene00001602	C45B2.5	Q95YD1	31	7.3434	20	8	0.283	23120	4.32526	LIGANQTETVDAFSSGVADR	TPSDLPIWNFDGTSTGQSLGEGSDVYIRPIALYR	16	6	0.169	23662	3.38095	LIGANQTETVDAFSSGVADR	TNNISELNAK	3.8531	WBGene00001602	gln-1	C45B2.5	Concise description: none available Provisional description: none available Detailed description: none available
179026	WBGene00000110	T05H4.13	Q8MXJ7	18	7.2856	3	1	0.02	23120	0.648789	AFTELVETQR	DIVQEK	4	3	0.075	23662	0.845237	FDHILYTGCPPVAK	TQGAVLIGGER	0.747013	WBGene00000110	alh-4	T05H4.13a	Concise description: none available Provisional description: none available Detailed description: none available
181170	WBGene00006538	B0272.1	P41937	22	7.2397	92	19	0.34	23120	19.8962	MAATFVGNSTAIQELFK	SLGGGTGSGMGTLLISK								9.9481	WBGene00006538	tbb-4	B0272.1	Concise description: none available Provisional description: none available Detailed description: none available
180880	WBGene00002007	C15H9.6	V6CJ24	69	7.2291	225	43	0.59	23120	48.6592	TIEEAVEEAISWLGSNAEASAEELKEQK	TIEEAVEEAISWLGSNAEASAEELK	224	43	0.549	23662	47.3333	TIEEAVEEAISWLGSNAEASAEELKEQK	TIEEAVEEAISWLGSNAEASAEELK	47.9963	WBGene00002007	hsp-3	C15H9.6	Concise description: hsp-3 encodes one of two C. elegans heat shock response 70 (hsp70) proteins homologous to mammalian grp78/BiP (glucose regulated protein 78/immunoglobulin heavy chain-binding protein, OMIM:138120); HSP-3 likely functions as a molecular chaperone, and is expressed constitutively (expression is not heat inducible) throughout development with greatest abundance during the L1 lar…
172376	WBGene00019001	F57B10.3	G5EFZ1	28	7.2153	17	10	0.242	23120	3.67647	VATYDLQPEMSAAGVADK	YAADETDEFLKPIILQGEK	15	9	0.244	23662	3.16964	DTSPNSGVGFLEQTLEFLEK	VATYDLQPEMSAAGVADK	3.42306	WBGene00019001	F57B10.3	F57B10.3a	Concise description: F57B10.3 encodes an experimentally confirmed cofactor-independent phosphoglycerate mutase that is essential for embryonic and larval viability, and for normal body morphology; paradoxically, F57B10.3 is also required for normally short livespan (in mass RNAi screens for Age phenotypes); F57B10.3 is expressed widely in larvae and adults, with highest expression in the nerve ri…
173235	WBGene00004445	W09C5.6	Q9U332	58	7.1697	15	4	0.336	23120	3.24394	STINEVVTR	ALDELKK	17	3	0.336	23662	3.59226	STINEVVTR	ALDELKK	3.4181	WBGene00004445	rpl-31	W09C5.6a	Concise description: rpl-31 encodes a large ribosomal subunit L31 protein. Provisional description: rpl-31 encodes a large ribosomal subunit L31 protein. Detailed description: none available
178614	WBGene00000552	T21H3.3	A0A0K3AVX0	34	7.1257	7	4	0.322	23120	1.51384	EAFSLFDKDGDGTITTK	ADQLTEEQIAEFK	7	4	0.329	23662	1.47916	EAFSLFDKDGDGTITTK	MADQLTEEQIAEFK	1.4965	WBGene00000552	cmd-1	T21H3.3	Concise description: cmd-1 encodes a putative homolog of calmodulin 1 that affects growth rate and fertility. Provisional description: cmd-1 encodes a putative homolog of calmodulin 1 that affects growth rate and fertility. Detailed description: none available
179936	WBGene00000877	Y49A3A.5	P52009	21	7.1231	7	2	0.13	23120	1.51384	IIPEFMIQGGDFTR	TVTIADCGELK	7	2	0.13	23662	1.47916	IIPEFMIQGGDFTR	TVTIADCGELK	1.4965	WBGene00000877	cyn-1	Y49A3A.5	Concise description: cyn-1 encodes a functional cyclophilin that is predicted to be secreted; cyn-1 expression increases as worms progress from the L1 larval stage to the adult stage; cyn-1 shares an operon with vha-13 and thus might be a previously undescribed V-ATPase component or ancillary protein. Provisional description: cyn-1 encodes a functional cyclophilin that is predicted to be secreted…
176195	WBGene00016250	C30C11.4	hsp-110	33	7.1212	24	16	0.29	23120	5.19031	NVFENVVNPILNK	IVEEVPAEAMEVDGDAK	25	16	0.247	23662	5.28273	TTMNQDEAVAR	TEAPAEPLEPVKK	5.23652	WBGene00016250	C30C11.4	C30C11.4	Concise description: C30C11.4 encodes a member of the Hsp70 family of heat shock proteins; loss of C30C11.4 activity via large-scale RNAi screens results in a variety of defects including embryonic and larval lethality, slow growth rates, and locomotory and morphological defects; in addition loss of C30C11.4 has been reported to result in a small but reproducible reduction in adult lifespan in ot…
174203	WBGene00002008	F43E2.8	V6CL98	53	7.1071	130	29	0.387	23120	28.1142	IINEPTAAAIAYGLDKK	NQLTINPENTIFDAK	126	30	0.376	23662	26.625	IINEPTAAAIAYGLDKK	IINEPTAAAIAYGLDK	27.3696	WBGene00002008	hsp-4	F43E2.8	Concise description: hsp-4 encodes one of two C. elegans heat shock response 70 (hsp70) proteins homologous to mammalian grp78/BiP (glucose regulated protein 78/immunoglobulin heavy chain-binding protein, OMIM:138120); hsp-4 affects embryonic and larval viability; hsp-4 is expressed in several tissues including the hypodermis, intestine, and spermatheca; hsp-4 transcription is upregulated in resp…
181545	WBGene00001898	M163.3	P10771	40	7.0648	42	9	0.337	23120	9.08304	APVAHPPYINMIK	SDSAVVAAAVEPK	42	13	0.423	23662	8.87499	MSDSAVVAAAVEPK	APVAHPPYINMIK	8.97902	WBGene00001898	his-24	M163.3	Concise description: his-24 encodes one of eight C. elegans H1 linker histones; HIS-24, along with the histone deacetylase SIR-2.1 and the Enhancer of zeste E(Z) ortholog MES-2, plays a key role in heterochromatin regulation and thus, in regulation of fertility and embryonic development; specifically, HIS-24 and SIR-2.1 are essential for maintenance of the histone H3K27me3 mark at subtelomeric re…
179053	WBGene00000784	F44C4.3	P43508	22	7.0357	4	3	0.122	23120	0.865052	HFGSTAYAVGK	GTNECGIEHAVVGGVPK	3	2	0.084	23662	0.633928	GTNECGIEHAVVGGVPK	HFGSTAYAVGK	0.74949	WBGene00000784	cpr-4	F44C4.3	Concise description: cpr-4 encodes a cathepsin B-like cysteine protease expressed at all life stages. Provisional description: cpr-4 encodes a cathepsin B-like cysteine protease expressed at all life stages. Detailed description: none available
174557	WBGene00002266	ZK892.1	I2HAG1	22	6.9887	6	4	0.131	23120	1.29758	YYPVPYESGIAADGLVPGK	IEPGQTLIIR	7	4	0.139	23662	1.47916	YYPVPYESGIAADGLVPGK	IEPGQTLIIR	1.38837	WBGene00002266	lec-3	ZK892.1a	Concise description: none available Provisional description: none available Detailed description: none available
177217	WBGene00022678	ZK180.4	sar-1	27	6.9679	11	3	0.228	23120	2.37889	DYFPAVDAVVFLIDVADAER	IDKPGALSEDQLK	12	4	0.269	23662	2.53571	IDKPGALSEDQLK	LVFLGLDNAGK	2.4573	WBGene00022678	sar-1	ZK180.4	Concise description: none available Provisional description: none available Detailed description: none available
172491	WBGene00006754	F07A5.7	B3WFV3	64	6.9624	88	26	0.347	23120	19.0311	HQDSCLDYQDQIEQLQK	QLQVQIQEAEAAALLGGK	82	27	0.361	23662	17.3274	HQDSCLDYQDQIEQLQK	FEAQANELANKVEDLNK	18.1792	WBGene00006754	unc-15	F07A5.7a	Concise description: The unc-15 gene encodes a paramyosin ortholog; UNC-15 protein physically interacts with MHC A, one isoform of myosin heavy chain (MHC) in striated muscle; UNC-15 accumulation is decreased in the absence of UNC-54 (myosin B), implying that degradation of UNC-15 is inhibited by its binding myosin B; conversely, myosin B (but not MYO-3/myosin A) fails to accumulate in unc-15 mut…
180931	WBGene00000786	C25B8.3	Q8MQC6	26	6.9594	3	2	0.089	23120	0.648789	GVDECGIESGVVGGIPK	SCGFGCNGGDPLAAWR	3	2	0.089	23662	0.633928	GVDECGIESGVVGGIPK	SCGFGCNGGDPLAAWR	0.641359	WBGene00000786	cpr-6	C25B8.3a	Concise description: none available Provisional description: none available Detailed description: none available
174778	WBGene00008546	F07A11.2	Q95QM8	18	6.9537	2	2	0.038	23120	0.432526	EIFEQPDSVVNTMR	VLPSGQVVLGGIK	4	3	0.066	23662	0.845237	QILEELSELPVVVELASDFLDR	LQTNHFPVSFSK	0.638881	WBGene00008546	F07A11.2	F07A11.2a	Concise description: F07A11.2 encodes two isoforms of a putative glucosamine-fructose 6-phosphate aminotransferase, paralogous to F22B3.4, thought to catalyse the first step of the hexosamine pathway to UDP-N-acetylglucosamine or UDP-N-acetylgalactosamine; F07A11.2 is expressed in many larval and adult tissues, but F07A11.2 transcripts are at least somewhat enriched during oogenesis; F07A11.2(RNA…
173167	WBGene00006529	C47B2.3	P34690	56	6.9468	141	24	0.578	23120	30.4931	AYHEALSVSDITNSCFEPANQMVK	FDGALNVDLNEFQTNLVPYPR	132	26	0.609	23662	27.8928	AYHEALSVSDITNSCFEPANQMVK	FDGALNVDLNEFQTNLVPYPR	29.1929	WBGene00006529	tba-2	C47B2.3	Concise description: tba-2 encodes an alpha-tubulin. Provisional description: In large-scale RNAi assays, tba-2 was found to affect embryonic viability and spindle structure. Detailed description: none available
176756	WBGene00009952	F53A2.7	O45552	70	6.9347	223	42	0.865	23120	48.2266	IGDIDIFEVNEAFAPQALAVQR	KYEFEDMLWDSLSDPYAK	202	39	0.865	23662	42.6845	LNVNGGAIALGHPLAASGAR	IGDIDIFEVNEAFAPQALAVQR	45.4556	WBGene00009952	F53A2.7	F53A2.7	Concise description: none available Provisional description: none available Detailed description: none available
177926	WBGene00002152	R11A8.6	Q21926	27	6.9238	14	10	0.1	23120	3.02768	LLANNDETYWVPAFVK	GYADLLYHVR	14	9	0.079	23662	2.95833	YTSEVPDYQGVYVK	ESVDDVTIPSR	2.99301	WBGene00002152	iars-1	R11A8.6	Concise description: irs-1 encodes a predicted cytoplasmic isoleucyl-tRNA synthetase (IleRS), an aminoacyl-tRNA synthetase that catalyzes the attachment of isoleucine to its cognate tRNA and is thus required for protein biosynthesis; loss of irs-1 activity via RNA-mediated interference (RNAi) results in sterility, embryonic lethality, and slower rates of growth, indicating that IRS-1 is essential…
178135	WBGene00006759	ZK617.1	A0A061AE24	21	6.9195	5	3	0.007	23120	1.08131	TGTPDVVDWDADR	TSTPVNEEVSQSESR	7	5	0.007	23662	1.47916	TSTPVNEEVSQSESR	TGTPDVVDWDADR	1.28024	WBGene00006759	unc-22	ZK617.1a	Concise description: unc-22 encodes twitchin, a giant intracellular protein with multiple fibronectin- and immunoglobulin-like domains and a single protein kinase domain that is homologous to titin (OMIM:188840); UNC-22 is required in muscle for regulation of the actomyosin contraction-relaxation cycle and for maintenance of normal muscle morphology; UNC-22 associates with myosin and is localized…
178709	WBGene00017499	F15E11.13	G5EET8	31	6.8569	18	6	0.444	23120	3.89273	VSIDNQTGSHFK	STDPTPPQLTR	20	6	0.457	23662	4.22619	VFPTEIHFISPSGESTTTFTK	VSIDNQTGSHFK	4.05946	WBGene00017499	F15E11.13	F15E11.13	Concise description: F15E11.13, along with Y19D10B.7, encodes a protein (CE25224) of unknown function; the Y19D10B.7/F15E11.13 proteins are present at significantly higher levels in daf-2 mutant vs. wild-type adults during a temperature shift from 15 to 25 degrees C; F15E11.13 (RNAi) animals have no obvious mutant phenotype (i. e., they have no obvious defect in fertility or germline maintenance)…
174798	WBGene00002262	F13D12.2	Q27888	33	6.8087	29	10	0.384	23120	6.27163	GEMMDLQHGLAFTR	VTVVGVGQVGMACAYSILQQNLANELCLVDVVADK	22	9	0.279	23662	4.6488	GEMMDLQHGLAFTR	EVFAEIAAPVENSHGK	5.46021	WBGene00002262	ldh-1	F13D12.2	Concise description: ldh-1 is orthologous to the human gene LACTATE DEHYDROGENASE B (LDHB; OMIM:150100), which when mutated leads to lactate dehydrogenase-B deficiency. Provisional description: This gene encodes a protein predicted by Eisenberg and coworkers, with 52 percentage accuracy, to be mitochondrial. Proteins localized to a given organelle by experiments tend to share a characteristic phy…
176512	WBGene00004736	K11D9.2	G5EEK8	46	6.7988	77	30	0.352	23120	16.6522	SASEMVLADDNFASIVSAVEEGR	NAESAIEALKEYEPEMAK	81	26	0.326	23662	17.1161	SASEMVLADDNFASIVSAVEEGR	NAESAIEALKEYEPEMAK	16.8842	WBGene00004736	sca-1	K11D9.2a	Concise description: The sca-1 gene encodes a sarco-endoplasmic reticulum Ca[2+] ATPase homolog that is required for development and muscle function; sca-1 is also a ortholog of human ATP2A1 (OMIM:108730), which when mutated leads to Darier-White disease (OMIM:124200). Provisional description: The sca-1 gene encodes a sarco-endoplasmic reticulum Ca[2+] ATPase homolog that is required for developm…
3565081	WBGene00022170	Y71H2AM.5	Y71H2AM.5	23	6.732	7	3	0.306	23120	1.51384	PVEVEVPPTTYER	DLLWAAPYDAR	7	5	0.438	23662	1.47916	PVEVEVPPTTYER	WDELLSEGR	1.4965	WBGene00022170	Y71H2AM.5	Y71H2AM.5	Concise description: none available Provisional description: none available Detailed description: none available
178710	WBGene00017490	F15E11.1	G5EBF3	35	6.7028	23	12	0.766	23120	4.97405	VEDHAQTTVIK	FQVLHQYTGNALEASK	24	11	0.708	23662	5.07142	VEDHAQTTVIK	FQVLHQYTGNALEASK	5.02273	WBGene00017490	F15E11.1	F15E11.1	Concise description: F15E11.1, along with F15E11.14, encodes a 17.4 kDa protein (CE16999) with unknown function that is seven-fold more abundant in glp-1 mutant hermaphrodites (which lack a germline) than in normal hermaphrodites; in addition, the protein products of F15E11.1/F15E11.14 are more abundant in daf-2 mutant vs. wild-type adults during a temperature shift from 15 to 25 degrees C; F15E1…
179676	WBGene00003515	K12F2.1	P12844	56	6.6729	42	18	0.081	23120	9.08304	LQEKEEEFENTR	DLTDQLGEGGR	36	16	0.075	23662	7.60713	DLTDQLGEGGR	LQEKEEEFENTR	8.34508	WBGene00003515	myo-3	K12F2.1	Concise description: myo-3 encodes MHC A, the minor isoform of MHC (myosin heavy chain) that is essential for thick filament formation, and for viability, movement, and embryonic elongation; expressed in body muscle, the somatic sheath cell covering the hermaphrodite gonad, and also expressed in enteric muscle, vulval muscles of the hermaphrodite and the diagonal muscles of the male tail. Provisi…
175028	WBGene00001886	ZK131.6	P09588	48	6.6607	16	5	0.331	23120	3.46021	AVLEYLAAEVLELAGNAAR	AGLQFPVGR	19	5	0.386	23662	4.01488	AVLEYLAAEVLELAGNAAR	AGLQFPVGR	3.73754	WBGene00001886	his-12	ZK131.6	Concise description: his-12 encodes an H2A histone; his-12 is contained within the histone gene cluster HIS3. Provisional description: his-12 encodes an H2A histone; his-12 is contained within the histone gene cluster HIS3. Detailed description: none available
179388	WBGene00007784	C27H6.2	O17607	18	6.6135	3	2	0.05	23120	0.648789	LAPIEEVKPTPK	AVLIAGPPATGK	4	3	0.084	23662	0.845237	LAPIEEVKPTPK	AVLIAGPPATGK	0.747013	WBGene00007784	ruvb-1	C27H6.2	Concise description: ruvb-1 encodes a AAA+ ATPase orthologous to the RUVBL1 family of ATPases; ruvb-1 functions as a component of the TOR signaling pathway that promotes localization of the box C/D snoRNP complex to nucleoli, thus enabling robust protein synthesis; ruvb-1 mutations strongly suppress pha-4 mutations, suggesting that pha-4 and the CeTOR pathway antagonize one another to regulate la…
177455	WBGene00004458	T22D1.9	Q9GZH5	52	6.601	67	24	0.287	23120	14.4896	AVPLALSLLSVSNPQLNILETLSK	VGQAVDVVAQAGKPK	71	25	0.365	23662	15.003	AVPLALSLLSVSNPQLNILETLSK	VGQAVDVVAQAGKPK	14.7463	WBGene00004458	rpn-1	T22D1.9	Concise description: rpn-1 encodes a non-ATPase subunit of the 26S proteasome's 19S regulatory particle (RP) base subcomplex; rpn-1 activity is essential for embryonic, larval, and germline development; by homology, RPN-1 is predicted to function in unfolding and recognition of protein substrates and/or recycling of ubiquitin moieties during protein degradation. Provisional description: rpn-1 enc…
179211	WBGene00000218	F21F8.3	O01532	18	6.5081	4	2	0.074	23120	0.865052	QFCNIYDIGGQR	KYQVISDTGTSFLGGPK	3	1	0.031	23662	0.633928	QFCNIYDIGGQR	NA	0.74949	WBGene00000218	asp-5	F21F8.3	Concise description: none available Provisional description: none available Detailed description: none available
176216	WBGene00015125	B0303.3	B0303.3	42	6.4543	27	10	0.261	23120	5.8391	FTDVVPVFLDGK	NLLSPELPAVAEFSTGETMGHSGDR	30	13	0.342	23662	6.33928	NLLSPELPAVAEFSTGETMGHSGDR	LNLWGGSLSIGHPFGATGVR	6.08919	WBGene00015125	B0303.3	B0303.3	Concise description: B0303.3 is orthologous to the human gene 3-KETOACYL-COA THIOLASE BETA-SUBUNIT OF TRIFUNCTIONAL PROTEIN (HADHB; OMIM:143450), which when mutated leads to disease. Provisional description: B0303.3 is orthologous to the human gene 3-KETOACYL-COA THIOLASE BETA-SUBUNIT OF TRIFUNCTIONAL PROTEIN (HADHB; OMIM:143450), which when mutated leads to disease. Detailed description: none av…
171692	WBGene00004429	Y48G8AL.8	Q9BL19	66	6.4137	35	10	0.476	23120	7.5692	GLDVDHLVIEHINVQR	EDVVSKPTDDAAPK	35	10	0.476	23662	7.39582	GLDVDHLVIEHINVQR	SADFLLDLLK	7.48251	WBGene00004429	rpl-17	Y48G8AL.8a	Concise description: rpl-17 encodes a large ribosomal subunit L17 protein; by homology, RPL-17 is predicted to function in protein biosynthesis; in C. elegans, RPL-17 activity is required for embryonic and germline development, as well as normal postembryonic growth rates. Provisional description: rpl-17 encodes a large ribosomal subunit L17 protein; by homology, RPL-17 is predicted to function i…
175750	WBGene00003901	F48E8.5	V5XY55	39	6.4114	33	14	0.305	23120	7.13668	SELAGVIMGLAPLIGK	LIEPILIELFDDK	32	15	0.305	23662	6.7619	SELAGVIMGLAPLIGK	LIEPILIELFDDK	6.94929	WBGene00003901	paa-1	F48E8.5	Concise description: paa-1 encodes a homolog of PR65, the structural subunit of protein phosphatase 2A (PP2A); PAA-1 protein is bound by SMG-5; PAA-1 is required in mass RNAi assays for embryonic viability, fertility, and cuticular integrity. Provisional description: SMG-5 interacts with PAA-1 in yeast two-hybrid experiments, and coimmunoprecipitates with PP2A and SMG-2. Eukaryotic PP2As are a fa…
174715	WBGene00004465	T06D8.8	Q22253	31	6.3987	15	7	0.227	23120	3.24394	GDINQVEQVVYVTWVQPR	LAAANGPLADDWK	16	8	0.22	23662	3.38095	LAAANGPLADDWK	VLDNPQIMQMATR	3.31244	WBGene00004465	rpn-9	T06D8.8	Concise description: rpn-9 is predicted to encode a non-ATPase subunit of the 19S regulatory complex of the proteasome that that affects body morphology, embryonic viability, locomotion, larval viability, fertility, and growth; interacts with RPN-11 in yeast two-hybrid assays. Provisional description: rpn-9 is predicted to encode a non-ATPase subunit of the 19S regulatory complex of the proteasom…
179010	WBGene00004373	W06H8.1	G5EEU7	26	6.3497	8	5	0.126	23120	1.7301	LEGHEIPSELPK	LLEVVDGMLATDIAR	10	7	0.168	23662	2.11309	LLEVVDGMLATDIAR	LEGHEIPSELPK	1.92159	WBGene00004373	rme-1	W06H8.1a	Concise description: rme-1 encodes a conserved, EPS15 homology (EH) domain-containing protein; RME-1 is required for endocytosis, specifically for modulating endocytic transport through the endosomal recycling compartment (ERC); RME-1 is ubiquitously expressed and, in the polarized intestinal epithelium, is found on basolateral recycling endosomes. Provisional description: Specifically, RME-1 is …
181333	WBGene00008572	F08B12.4	F08B12.4	22	6.3455	6	2	0.333	23120	1.29758	GVPHPNSAAGQALSGK	PVEQDGLTGGR	4	2	0.333	23662	0.845237	GVPHPNSAAGQALSGK	PVEQDGLTGGR	1.07141	WBGene00008572	F08B12.4	F08B12.4a	Concise description: none available Provisional description: none available Detailed description: none available
181119	WBGene00006587	F53A9.10	Q7Z071	34	6.3204	15	9	0.201	23120	3.24394	GDQAANFGNLAQGAK	AQDVSTLMPNDLK	13	5	0.129	23662	2.74702	GDQAANFGNLAQGAK	AFLNVVCK	2.99548	WBGene00006587	tnt-2	F53A9.10a	Concise description: none available Provisional description: none available Detailed description: none available
173846	WBGene00019893	R05F9.10	Q21746	28	6.3078	10	6	0.223	23120	2.16263	SEEIKPSAPDAPTASPIVTR	MGLAYSCQNR	13	6	0.234	23662	2.74702	LEQYDLAIQDCR	MSEEIKPSAPDAPTASPIVTR	2.45483	WBGene00019893	sgt-1	R05F9.10	Concise description: none available Provisional description: none available Detailed description: none available
179641	WBGene00004501	C52E4.4	Q18787	41	6.2805	44	17	0.432	23120	9.51557	FVVDLADSVAPTDIEEGMR	QAMQQEQPLQVAR	35	14	0.361	23662	7.39582	FVVDLADSVAPTDIEEGMR	QAMQQEQPLQVAR	8.4557	WBGene00004501	rpt-1	C52E4.4	Concise description: rpt-1 encodes a predicted ATPase subunit of the 19S regulatory complex of the proteasome that affects fertility and embryonic viability. Provisional description: rpt-1 encodes a predicted ATPase subunit of the 19S regulatory complex of the proteasome that affects fertility and embryonic viability. Detailed description: none available
181570	WBGene00007350	C05G5.4	sucl-1	33	6.2606	15	7	0.354	23120	3.24394	LVGPNCPGIISADQCK	MGHAGAIISGGK	10	5	0.18	23662	2.11309	LVGPNCPGIISADQCK	AGTEHLGLPVFK	2.67851	WBGene00007350	sucl-1	C05G5.4	Concise description: none available Provisional description: none available Detailed description: none available
172743	WBGene00001167	F25H5.4	P29691	72	6.247	186	54	0.576	23120	40.2249	LHCTAQPMPDGLADDIEGGTVNAR	LLEPVYLVEIQCPEAAVGGIYGVLNR	179	53	0.608	23662	37.8244	LLEPVYLVEIQCPEAAVGGIYGVLNR	LHCTAQPMPDGLADDIEGGTVNAR	39.0247	WBGene00001167	eef-2	F25H5.4a	Concise description: eef-2 encodes a homolog of translation elongation factor 2 (EF-2), a GTP-binding protein essential for the elongation phase of protein synthesis; eef-2 is required for embryogenesis and vulval morphogenesis, and is expressed during all stages of development, including the dauer larval stage. Provisional description: eef-2 encodes a homolog of translation elongation factor 2 (…
176794	WBGene00011735	T12D8.8	G5EE04	38	6.2269	28	13	0.334	23120	6.05536	IDNEGVIEPEEAVALPMGDSAK	LDYDEAANEWLK	31	13	0.329	23662	6.55059	IDNEGVIEPEEAVALPMGDSAK	QFVGMCQANPAVLHAPEFGFFK	6.30297	WBGene00011735	hip-1	T12D8.8	Concise description: none available Provisional description: none available Detailed description: none available
172920	WBGene00003902	Y106G6H.2	Q7K797	60	6.1872	35	15	0.342	23120	7.5692	GFGFVAFANPEEAETAVQALHDSTIEGTDLK	MHGNVPGAAMYNPTQPGPGYYVANPMQQQR	34	15	0.31	23662	7.18452	MHGNVPGAAMYNPTQPGPGYYVANPMQQQR	AMDTMNFEALHGK	7.37686	WBGene00003902	pab-1	Y106G6H.2a	Concise description: pab-1 encodes a polyadenylate-binding protein (i.e., poly(A)-binding protein, or PAB); pab-1 is essential for germline proliferation, regulation of adult lifespan, and normal body size; PAB-1 forms a complex with ATX-2, the C. elegans ataxin 2 ortholog, which is also required for germline development; PAB-1 has been successfully used as an epitope-tagged transgenic reagent fo…
176788	WBGene00011474	T05D4.1	P54216	49	6.1718	74	21	0.753	23120	16.0035	YASICQQNGLVPIVEPEILPDGEHCLAR	GVVPMAGTIGEGTTQGLDDLNAR	70	20	0.663	23662	14.7916	YTGDASADAAASQSLFVANHSY	YASICQQNGLVPIVEPEILPDGEHCLAR	15.3976	WBGene00011474	aldo-1	T05D4.1	Concise description: aldo-1 is orthologous to the human gene ALDOLASE A, FRUCTOSE-BISPHOSPHATE (ALDOA; OMIM:103850), which when mutated leads to aldolase A deficiency. Provisional description: T05D4.1 is also homologous to human ADHUB, which when mutated leads to fructosemia (OMIM:229600). Detailed description: none available
172968	WBGene00016392	C34B2.7	O44954	40	6.1709	36	12	0.188	23120	7.78547	LGANSLLDLVIFGR	LGANSLLDLVIFGR	37	12	0.181	23662	7.81844	LGANSLLDLVIFGR	LGANSLLDLVIFGR	7.80196	WBGene00016392	sdha-2	C34B2.7	Concise description: sdha-2 encodes one of two C. elegans flavoprotein subunits of the mitochondrial succinate dehydrogenase complex (Complex II). Provisional description: sdha-2 encodes one of two C. elegans flavoprotein subunits of the mitochondrial succinate dehydrogenase complex (Complex II). Detailed description: none available
181175	WBGene00009888	F49E2.5	F49E2.5	28	6.149	14	8	0.113	23120	3.02768	TPTNTPAEPAEQVQEITGK	VVTEEPHQQAAPQEK	10	6	0.091	23662	2.11309	TPTNTPAEPAEQVQEITGK	VVTEEPHQQAAPQEK	2.57038	WBGene00009888	F49E2.5	F49E2.5a	Concise description: none available Provisional description: none available Detailed description: none available
174927	WBGene00009394	F35C5.6	O45444	24	6.145	5	2	0.056	23120	1.08131	GIGAAENVLQSGR	SNFDDENSYK	9	5	0.129	23662	1.90178	GIGAAENVLQSGR	GEGELDPIPVADR	1.49154	WBGene00009394	clec-63	F35C5.6	Concise description: none available Provisional description: none available Detailed description: none available
176766	WBGene00009732	F45G2.4	O62246	25	6.1348	7	3	0.192	23120	1.51384	TTDLEMHQAVVSILTQDYAAAEELLESALER	SYIAQGQAFIPLK	6	4	0.199	23662	1.26786	TTDLEMHQAVVSILTQDYAAAEELLESALER	SYIAQGQAFIPLK	1.39085	WBGene00009732	F45G2.4	F45G2.4	Concise description: F45G2.4 encodes an epsilon subunit of the coatomer (COPI) complex; in mass RNAi assays, F45G2.4 is required for larval viability, proper locomotion, and properly rapid growth. Provisional description: F45G2.4 encodes an epsilon subunit of the coatomer (COPI) complex; in mass RNAi assays, F45G2.4 is required for larval viability, proper locomotion, and properly rapid growth. D…
172831	WBGene00006528	F26E4.8	H2L2E8	59	6.1293	118	23	0.526	23120	25.519	FDGALNVDLNEFQTNLVPYPR	AYHEALSVNDITNSCFEPANQMVK	118	25	0.557	23662	24.9345	AYHEALSVNDITNSCFEPANQMVK	FDGALNVDLNEFQTNLVPYPR	25.2267	WBGene00006528	tba-1	F26E4.8a	Concise description: tba-1 encodes one of nine C. elegans alpha-tubulins; in early embryos, tba-1 is required, partially redundantly with the closely related tba-2, for a number of microtubule-dependent processes and hence, for normal embryonic development; wild-type tba-1 activity is also required for cell migrations as well as motor neuron synapse and axon development; tba-1 is transcribed duri…
175922	WBGene00001005	T26A5.9	Q22799	29	6.1104	14	3	0.494	23120	3.02768	NADMSDDMQQDAIDCATQALEK	NFGSYVTHETK	15	3	0.494	23662	3.16964	NADMSDDMQQDAIDCATQALEK	YNPTWHCIVGR	3.09866	WBGene00001005	dlc-1	T26A5.9	Concise description: dlc-1 encodes a dynein light chain 1, required for viability, that inhibits DHC-1 in vivo; DLC-1 is 92-95 percentage identical to its orthologs human DYNLL1 (OMIM:601562) and DYNLL2 (OMIM:608942); DLC-1 is paralogous to DLC-2/-6; DLC-1 is expressed in adult body wall muscle, and in larval and adult pharynx, posterior intestine, and nervous system (e.g., ventral nerve cord, he…
187630	WBGene00011045	R05H10.5	U4PB05	25	6.0992	11	5	0.313	23120	2.37889	ASVHGITVK	IDVNGDNTAPLYK	7	3	0.19	23662	1.47916	MASVHGITVK	IDVNGDNTAPLYK	1.92902	WBGene00011045	gpx-2	R05H10.5	Concise description: none available Provisional description: none available Detailed description: none available
171769	WBGene00021351	Y37E3.10	Y37E3.10	35	6.0982	5	2	0.058	23120	1.08131	GLDQQVDAEEASR	LTPQAVK	8	4	0.155	23662	1.69047	EGGIEAVNSILDTIK	GLDQQVDAEEASR	1.38589	WBGene00021351	Y37E3.10	Y37E3.10	Concise description: none available Provisional description: none available Detailed description: none available
178288	WBGene00013463	Y67H2A.5	Y67H2A.5	22	6.0813	6	4	0.269	23120	1.29758	ASFQAVPTNAGK	LPEGTK	4	3	0.228	23662	0.845237	ASFQAVPTNAGK	CGNLVMGK	1.07141	WBGene00013463	Y67H2A.5	Y67H2A.5	Concise description: Y67H2A.5 encodes a KASH domain (klarsicht, ANC-1 and Syne) protein; vertebrate KASH domain proteins include SYNE1 and SYNE2; most KASH domain proteins do not share primary sequence homology outside of their KASH domain; Y67H2A.5 is required for meiotic progression in the gonad and normal cell cycle progression in the early embryo; knock-down of Y67H2A.5 results in embryonic a…
177072	WBGene00021883	Y54G2A.18	G5EBI0	22	6.0792	6	4	0.216	23120	1.29758	TLMNSADTNEEAAGLAK	AAQLEAASEAAMR	5	3	0.188	23662	1.05655	TLMNSADTNEEAAGLAK	AAQLEAASEAAMR	1.17707	WBGene00021883	Y54G2A.18	Y54G2A.18	Concise description: none available Provisional description: none available Detailed description: none available
175691	WBGene00000107	F54D8.3	Q8IG19	41	6.0627	40	15	0.357	23120	8.65052	DQMTIAQEEIFGPVMTIIR	VAEQTPLSALHVAALTK	40	16	0.343	23662	8.45237	VAEQTPLSALHVAALTK	DQMTIAQEEIFGPVMTIIR	8.55144	WBGene00000107	alh-1	F54D8.3a	Concise description: alh-1 is orthologous to the human gene ALDEHYDE DEHYDROGENASE 2, MITOCHONDRIAL (ALDH2; OMIM:100650), in which a polymorphism can lead to acute ethanol intolerance. Provisional description: alh-1 is orthologous to the human gene ALDEHYDE DEHYDROGENASE 2, MITOCHONDRIAL (ALDH2; OMIM:100650), in which a polymorphism can lead to acute ethanol intolerance. Detailed description: non…
177235	WBGene00020679	T22B11.5	U4PC51	29	6.056	11	7	0.089	23120	2.37889	ILNEGVANEQYVK	SPVEDFQSGSNFQR	11	6	0.075	23662	2.3244	IAVVANPSHLEAVDPVVMGK	LSGQDVQR	2.35164	WBGene00020679	ogdh-1	T22B11.5	Concise description: The T22B11.5 gene encodes an ortholog of the human gene OGDH, which when mutated leads to alpha-ketoglutarate deficiency (OMIM:203740); the T22B11.5 protein is predicted to be mitochondrial with 68 percentage accuracy. Provisional description: Proteins localized to a given organelle by experiments tend to share a characteristic phylogenetic distribution of their homologs, cal…
175877	WBGene00004459	C23G10.4	Q18115	41	6.0546	31	16	0.194	23120	6.70415	TGLGNDAEYVNK	SQPGGASNAAAFIR	32	19	0.224	23662	6.7619	SQPGGASNAAAFIR	TGLGNDAEYVNK	6.73302	WBGene00004459	rpn-2	C23G10.4a	Concise description: rpn-2 encodes a non-ATPase subunit of the 26S proteasome's 19S regulatory paritcle (RP) base subcomplex; RPN-2 is required for embryonic, larval, and germline development and by homology, is predicted to function in unfolding and recognition of protein substrates and/or recycling of ubiquitin moieties during protein degradation; RPN-2 is expressed sporadically at all stages o…
181444	WBGene00000217	R12H7.2	Q21966	34	6.0429	18	8	0.264	23120	3.89273	FDGILGMAYPEIAVLGVQPVFNTLFEQK	AQIEAIQNFIGAEPLIK	24	8	0.23	23662	5.07142	FDGILGMAYPEIAVLGVQPVFNTLFEQK	AQIEAIQNFIGAEPLIK	4.48208	WBGene00000217	asp-4	R12H7.2	Concise description: asp-4 encodes an aspartyl protease homolog that is required, in parallel with ASP-3 but downstream of CLP-1 and TRA-3, for degenerative (necrotic-like) cell death in neurons induced by mutations such as mec-4(d), deg-3(d), or gsa-1(gf). Provisional description: asp-4 encodes an aspartyl protease homolog that is required, in parallel with ASP-3 but downstream of CLP-1 and TRA-…
177028	WBGene00021420	Y38F2AR.2	Q95XS1	20	6.0269	3	2	0.062	23120	0.648789	EISGQYAADKK	EISGQYAADKK	5	2	0.096	23662	1.05655	EISGQYAADKK	HQIVMK	0.852669	WBGene00021420	trap-3	Y38F2AR.2	Concise description: none available Provisional description: none available Detailed description: none available
177841	WBGene00009319	F32B6.2	O45430	30	5.9996	11	5	0.094	23120	2.37889	IIEEAPAPNMEHDTR	SDAGVFQNLSFFR	14	8	0.161	23662	2.95833	ELFAESETPAEIYVESAVAHALAALQK	IIEEAPAPNMEHDTR	2.66861	WBGene00009319	mccc-1	F32B6.2	Concise description: mccc-1 encodes an ortholog of the human gene ALPHA METHYLCROTONOYL-COENZYME A CARBOXYLASE 1 (MCCC1; 3-MCC), which when mutated leads to beta-methylcrotonyl-glycinuria (OMIM:210200). Provisional description: mccc-1 encodes an ortholog of the human gene ALPHA METHYLCROTONOYL-COENZYME A CARBOXYLASE 1 (MCCC1; 3-MCC), which when mutated leads to beta-methylcrotonyl-glycinuria (OMI…
3565206	WBGene00020166	T02G5.7	T02G5.7	36	5.9867	28	10	0.374	23120	6.05536	QISLSAGLPVTTQAVTVNK	APIDFTVAPVDAVR	24	11	0.395	23662	5.07142	GGAVAIGHPLGMSGLR	QISLSAGLPVTTQAVTVNK	5.56339	WBGene00020166	T02G5.7	T02G5.7	Concise description: The T02G5.7 gene encodes a homolog of the human gene ACAT1, which when mutated leads to alpha-methylacetoaceticaciduria (OMIM:203750). Provisional description: The T02G5.7 gene encodes a homolog of the human gene ACAT1, which when mutated leads to alpha-methylacetoaceticaciduria (OMIM:203750). Detailed description: none available
180864	WBGene00002190	R07E4.6	P30625	34	5.9517	18	10	0.282	23120	3.89273	AQEGGNPDAADDDDIIVEPPKR	NLLFAHLEEDEQK	20	7	0.221	23662	4.22619	NLLFAHLEEDEQK	AQEGGNPDAADDDDIIVEPPKR	4.05946	WBGene00002190	kin-2	R07E4.6a	Concise description: kin-2 encodes a predicted regulatory subunit of a cAMP-dependent protein kinase that may act downstream of, or in parallel to, ric-8. Provisional description: kin-2 encodes a predicted regulatory subunit of a cAMP-dependent protein kinase that may act downstream of, or in parallel to, ric-8. Detailed description: none available
179069	WBGene00020808	T25F10.6	H2L0M6	58	5.9048	46	17	0.534	23120	9.9481	QVYTPFTDDTHEDLPADIAR	EGASQAGMTGFGAFR	37	16	0.483	23662	7.81844	QVYTPFTDDTHEDLPADIAR	SDNLAEITDEKK	8.88327	WBGene00020808	T25F10.6	T25F10.6a	Concise description: none available Provisional description: none available Detailed description: none available
181031	WBGene00016898	C53C9.2	C53C9.2	25	5.9025	4	2	0.063	23120	0.865052	SEGIVPLQSGTNK	VQCGTNQYASQK	5	4	0.144	23662	1.05655	SEGIVPLQSGTNK	VQCGTNQYASQK	0.960801	WBGene00016898	C53C9.2	C53C9.2	Concise description: none available Provisional description: none available Detailed description: none available
176089	WBGene00022793	ZK686.3	ZK686.3	19	5.8981	3	3	0.1	23120	0.648789	GPPFMITNPNTK	VQNLVDLTSR	4	2	0.066	23662	0.845237	VQNLVDLTSR	GPPFMITNPNTK	0.747013	WBGene00022793	ZK686.3	ZK686.3	Concise description: ZK686.3 is orthologous to the putative tumor suppressor candidate 3 (TUSC3); TUSC3 is involved in plasma membrane magnesium ion transport; ZK686.3 is also orthologous to the S. cerevisiae dolichyl-diphosphooligosaccharide-protein glycotransferase gamma chain (34-kD) subunit, OST3. Provisional description: ZK686.3 is orthologous to the putative tumor suppressor candidate 3 (TU…
177101	WBGene00001999	F42A6.7	Q22037	17	5.8961	2	2	0.092	23120	0.432526	AENGSGDASLEPENLR	IFVGGLTSNTTDDLMR	2	2	0.092	23662	0.422619	IFVGGLTSNTTDDLMR	AENGSGDASLEPENLR	0.427573	WBGene00001999	hrp-1	F42A6.7a	Concise description: hrp-1 encodes a putative heterogeneous nuclear ribonucleoprotein (hnRNP) required for mRNA surveillance, normally rapid growth, normally short lifespan, normally short body length, vulval development, DAF-18 function, fertility, and general viability; HRP-1 has two N-terminal RRM domains and a low-complexity C-terminal domain; HRP-1's homologs include HNRNPA0 (OMIM:609409), H…
174934	WBGene00010266	F58G1.4	O62277	22	5.8628	5	4	0.166	23120	1.08131	KCEDGVDNVIK	YTLCSLAPSVCSVLK	5	4	0.247	23662	1.05655	TWLNIYSEEGK	EPIDIGALPIPQLGGDWK	1.06893	WBGene00010266	dct-18	F58G1.4	Concise description: none available Provisional description: none available Detailed description: none available
266822	WBGene00001404	K07A3.1	G5EBJ7	27	5.8423	11	6	0.185	23120	2.37889	LYGIAGATNVQGEEVK	LDVEEALEYLAK	10	5	0.194	23662	2.11309	LYGIAGATNVQGEEVK	ILDIQPTQIHQR	2.24599	WBGene00001404	fbp-1	K07A3.1	Concise description: fbp-1 encodes fructose 1,6-bisphosphatase, a gluconeogenic enzyme that catalyzes the hydrolysis of fructose 1,6-bisphosphate to fructose 6-phosphate and inorganic phosphate in a reaction that reverses the third enzymatic step of glycolysis; FBP-1 is orthologous to human FBP1 (OMIM:229700, mutated in FBP deficiency). Provisional description: fbp-1 encodes fructose 1,6-bisphosp…
179534	WBGene00000064	T04C12.5	P10984	58	5.8265								231	32	0.734	23662	48.8124	CPEALFQPSFLGMESAGIHETSYNSIMK	LCYVALDFEQEMATAASSSSLEK	24.4062	WBGene00000064	act-2	T04C12.5	Concise description: act-2 encodes an invertebrate actin that may function specifically in the pharynx. Provisional description: The act-2 gene, embedded in the 11-kb gene cluster act-123, encodes an typical invertebrate actin highly similar to ACT-1, ACT-3, and ACT-4; a single mutant allele of act-2 has been isolated on the basis of defective feeding (an Eat phenotype), as part of a double mutan…
181417	WBGene00011938	T22H6.2	P54889	26	5.8095	10	2	0.026	23120	2.16263	GPSGMTADKR	SAGLDPQLLNR	6	3	0.042	23662	1.26786	SAGLDPQLLNR	GPSGMTADKR	1.71524	WBGene00011938	alh-13	T22H6.2a	Concise description: none available Provisional description: none available Detailed description: none available
178002	WBGene00012382	Y5F2A.1	P55955	21	5.8021	4	2	0.144	23120	0.865052	DTLDPDDLLDTK	GVAVCNK	5	2	0.144	23662	1.05655	DTLDPDDLLDTK	GVAVCNK	0.960801	WBGene00012382	ttr-16	Y5F2A.1	Concise description: none available Provisional description: none available Detailed description: none available
175908	WBGene00015814	C16A3.10	C16A3.10	36	5.7991	24	11	0.325	23120	5.19031	VLPMNTGVEACESAVK	VAIAALEILQEEK	23	12	0.346	23662	4.86011	VLPMNTGVEACESAVK	VAIAALEILQEEK	5.02521	WBGene00015814	C16A3.10	C16A3.10a	Concise description: C16A3.10 encodes an ornithine transaminase orthologous to the human gene OAT (ornithine aminotransferase); the product of C16A3.10 is predicted to catalyze the conversion of ornithine to L-glutamate-5-semialdehyde in the process of arginine-to-proline conversion. Provisional description: C16A3.10 encodes an ornithine transaminase orthologous to the human gene OAT (ornithine a…
176196	WBGene00004460	C30C11.2	Q04908	45	5.7902	46	20	0.462	23120	9.9481	NTEALALGENQLTSIYNFDR	ALQLDYNSAAGYFLQAQR	43	19	0.419	23662	9.0863	LVSSHLSSDAQFAEGMLK	YCLELHNQAVK	9.5172	WBGene00004460	rpn-3	C30C11.2	Concise description: none available Provisional description: none available Detailed description: none available
259727	WBGene00012018	T25C12.3	T25C12.3	40	5.7896	20	11	0.069	23120	4.32526	SSPEDYLQVGQISQK	FTGIDQYGYAFER	17	11	0.078	23662	3.59226	GQNSDYELVAINDPETK	FTGIDQYGYAFER	3.95876	WBGene00012018	T25C12.3	T25C12.3	Concise description: none available Provisional description: none available Detailed description: none available
171775	WBGene00021355	Y37E3.17	Y37E3.17	26	5.7883	9	5	0.075	23120	1.94637	ELAPDVDHSK	TTLLTPDQVR	6	3	0.056	23662	1.26786	ELAPDVDHSK	AAVFSMTPDGYPLVGPYDK	1.60712	WBGene00021355	Y37E3.17	Y37E3.17a	Concise description: Y37E3.17 encodes a putative mitochondrial dimethylglycine dehydrogenase orthologous to human DMGDH; studies indicate that the elegans dehydrogenase is a phosphorylcholine (PCho)-modified protein; P-Cho modification of proteins seems to play a developmental role in nematodes, as interfering with it, causes viability and fertility defects. Provisional description: Y37E3.17 enco…
174423	WBGene00011884	T21B10.2	Q27527	67	5.7505	129	34	0.723	23120	27.8979	SGETEDTFIADLVVGLATGQIK	EYPVVSIEDAFDQDDWDNWGK	139	34	0.684	23662	29.372	SGETEDTFIADLVVGLATGQIK	EYPVVSIEDAFDQDDWDNWGK	28.6349	WBGene00011884	enol-1	T21B10.2a	Concise description: enol-1 is orthologous to human ENOLASE 1 (also CRYSTALLIN, TAU; ENO1; OMIM:172430), which when mutated leads to spherocytic red cell enolase deficiency. Provisional description: enol-1 is orthologous to human ENOLASE 1 (also CRYSTALLIN, TAU; ENO1; OMIM:172430), which when mutated leads to spherocytic red cell enolase deficiency. Detailed description: none available
173357	WBGene00009306	F32A7.5	H2FLK1	37	5.7478	24	12	0.151	23120	5.19031	YPANIIYQSAAK	GAPAKPAANTAK	25	12	0.156	23662	5.28273	YPANIIYQSAAK	ALAGGNEAEVEK	5.23652	WBGene00009306	F32A7.5	F32A7.5a	Concise description: none available Provisional description: none available Detailed description: none available
176855	WBGene00022048	Y66H1B.2	U4PBK4	41	5.714	32	16	0.076	23120	6.92042	GETGTFNAFNIYHR	SPGGIEEPCFVR	33	18	0.087	23662	6.97321	GETGTFNAFNIYHR	EAGEHLITVK	6.94681	WBGene00022048	fln-1	Y66H1B.2a	Concise description: fln-1 encodes three protein isoforms, a full length filamin (fln-1a) orthologous to human filamin A, alpha (FLNA; OMIM:300017), of 2257 amino acids containing a well conserved N-terminal ABD and 20 Ig-like repeats and two trans-sliced versions with C- and N- terminal truncations are 1084 and 836 amino-acids respectively; expression of full-length filamin in hermaphrodites is …
172062	WBGene00004436	D1007.12	O01868	57	5.7126	31	8	0.352	23120	6.70415	AVAGLSLDAILAK	VETCVYSGYK	32	8	0.352	23662	6.7619	AVAGLSLDAILAK	VETCVYSGYK	6.73302	WBGene00004436	rpl-24.1	D1007.12	Concise description: rpl-24.1 encodes a large ribosomal subunit L24 protein. Provisional description: rpl-24.1 encodes a large ribosomal subunit L24 protein. Detailed description: none available
177456	WBGene00020683	T22D1.4	Q9GZH4	18	5.6964	4	2	0.038	23120	0.865052	TAGTEEQQFLNK	GAELDGPFSR	1	1	0.02	23662	0.211309	TAGTEEQQFLNK	NA	0.53818	WBGene00020683	ribo-1	T22D1.4	Concise description: none available Provisional description: none available Detailed description: none available
177018	WBGene00006911	R10E11.2	P34546	39	5.6824	16	5	0.422	23120	3.46021	AAYAPFFGYMGAASAQIFTVLGAAYGTAK	VTSASAGYDLNK	13	5	0.429	23662	2.74702	AAYAPFFGYMGAASAQIFTVLGAAYGTAK	VTSASAGYDLNK	3.10362	WBGene00006911	vha-2	R10E11.2	Concise description: vha-2 and vha-3 encode an ortholog of subunit c of the membrane-bound (V0) domain of vacuolar proton-translocating ATPase (V-ATPase); the protein encoded by vha-2 and vha-3 (VHA-2/3) is identical; VHA-2/3 is a predicted V-ATPase transmembrane rotor component, whose polypeptide sequence is identical to that of VHA-3; VHA-1 and VHA-2/3 comprise a closely related family of subun…
171850	WBGene00021128	W10C8.5	W10C8.5	33	5.6714	14	8	0.178	23120	3.02768	IIEDYHGFSPK	LGWLTFCPTNLGSTVR	17	9	0.178	23662	3.59226	IIEDYHGFSPK	DHFLFK	3.30997	WBGene00021128	W10C8.5	W10C8.5	Concise description: none available Provisional description: none available Detailed description: none available
175376	WBGene00000160	Y71H2B.10	Q9N4F3	22	5.6425	4	3	0.037	23120	0.865052	FGSSLLDTSSTPNAAR	LQQNNIHTVAR	3	3	0.024	23662	0.633928	VVLTEK	RPDILK	0.74949	WBGene00000160	apb-1	Y71H2B.10a	Concise description: apb-1 encodes an adaptin: specifically, it encodes an ortholog of the beta1/2 subunit of adaptor protein complex 1 (AP1); loss of abp-1 activity via RNAi results in defects in receptor-mediated yolk endocytosis and thus, embryonic lethality. Provisional description: apb-1 encodes an adaptin: specifically, it encodes an ortholog of the beta1/2 subunit of adaptor protein comple…
180613	WBGene00018237	F40F4.6	Q20219	43	5.6323	22	10	0.065	23120	4.75779	DPLGAAHSATPVYNVNDQK	QNSDTVNQLIANLK	14	8	0.047	23662	2.95833	DPLGAAHSATPVYNVNDQK	TLASSVPADTGCTVK	3.85806	WBGene00018237	F40F4.6	F40F4.6	Concise description: none available Provisional description: none available Detailed description: none available
176399	WBGene00010778	K11H3.1	A7LPE5	33	5.6195	13	7	0.236	23120	2.81142	NVVACAAGFTDGLGYGDNTK	IPADTQAISLIK	11	6	0.192	23662	2.3244	NVVACAAGFTDGLGYGDNTK	IPADTQAISLIK	2.56791	WBGene00010778	gpdh-2	K11H3.1a	Concise description: gpdh-2 encodes one of two C. elegans glycerol 3-phosphate dehydrogenases; although loss of gpdh-2 activity via large-scale RNAi screens results in no obvious defects, expression of a gpdh-2 cDNA in Saccharomyces cerevisiae hog1 mutants is able to rescue the high osmolarity-sensitive growth phenotype of these mutants, suggesting that gpdh-2 encodes a functional glycerol 3-phos…
172655	WBGene00009664	F43G9.1	Q93714	48	5.6058	50	15	0.508	23120	10.8131	GAAVFESVHGTAPDIAGQDK	ENTEGEYSGIEHEIVPGVVQSIK	52	16	0.508	23662	10.9881	GAAVFESVHGTAPDIAGQDK	ENTEGEYSGIEHEIVPGVVQSIK	10.9006	WBGene00009664	idha-1	F43G9.1	Concise description: F43G9.1 encodes the C. elegans homolog of the alpha subunit of an NAD+-dependent mitochondrial isocitrate dehydrogenase; by homology, the product of F43G9.1 is predicted to catalyze the formation of alpha-ketoglutarate from isocitrate as part of the citric acid cycle. Provisional description: F43G9.1 encodes the C. elegans homolog of the alpha subunit of an NAD+-dependent mit…
173858	WBGene00003949	Y38A8.2	Q23237	19	5.5933	3	2	0.127	23120	0.648789	IGEQMTTIATDQK	VYVGLAGFQSDAR	3	1	0.064	23662	0.633928	IGEQMTTIATDQK	NA	0.641359	WBGene00003949	pbs-3	Y38A8.2	Concise description: pbs-3 encodes a B-type subunit of the 26S proteasome's 20S protease core particle; by homology, PBS-3 is predicted to function in ATP/ubiquitin-dependent nonlysosomal protein degradation; loss of pbs-3 activity via large-scale RNAi screens indicates that, in C. elegans, PBS-3 is required for embryonic and germline development, movement, normal body coloration, and normal body…
181108	WBGene00015391	C03G5.1	Q09508	62	5.5932	109	27	0.498	23120	23.5727	AFFSCTSAHTCTGDGTALTAR	LGANSLLDLVIFGR	108	30	0.576	23662	22.8214	AFFSCTSAHTCTGDGTALTAR	LGANSLLDLVIFGR	23.1971	WBGene00015391	sdha-1	C03G5.1	Concise description: sdha-1 is orthologous to the human gene SUCCINATE DEHYDROGENASE COMPLEX, SUBUNIT A, FLAVOPROTEIN (SDHA; OMIM:600857), which when mutated leads to complex II mitochondrial respiratory chain deficiency presenting as Leigh syndrome. Provisional description: This gene encodes a protein predicted by Eisenberg and coworkers, with 52 percentage accuracy, to be mitochondrial. Protein…
180897	WBGene00015778	C14F11.1	Q8MQD9	30	5.5764	12	5	0.145	23120	2.59516	IFTTQSISGTGALR	VGAFSVVTSDADEAAR	13	5	0.147	23662	2.74702	IFTTQSISGTGALR	VGAFSVVTSDADEAAR	2.67109	WBGene00015778	got-2.2	C14F11.1a	Concise description: none available Provisional description: none available Detailed description: none available
171767	WBGene00021350	Y37E3.8	Y37E3.8	62	5.5669	29	8	0.455	23120	6.27163	NQHYCPTVNVER	FFSHEAEQK	28	7	0.441	23662	5.91666	NQHYCPTVNVER	GLLPETPLIVK	6.09415	WBGene00021350	Y37E3.8	Y37E3.8a	Concise description: none available Provisional description: none available Detailed description: none available
172471	WBGene00002348	R06C7.10	P02567	55	5.5494	89	43	0.251	23120	19.2474	LASCDIEHYLLEK	VTLEDQIVQTNPVLEAFGNAK	79	37	0.213	23662	16.6934	LASCDIEHYLLEK	VTLEDQIVQTNPVLEAFGNAK	17.9704	WBGene00002348	myo-1	R06C7.10	Concise description: none available Provisional description: none available Detailed description: none available
175030	WBGene00001883	ZK131.3	K7ZUH9	40	5.5334	17	5	0.507	23120	3.67647	FQSSAVMALQEAAEAYLVGLFEDTNLCAIHAK	KSAPASGGVK	16	4	0.426	23662	3.38095	FQSSAVMALQEAAEAYLVGLFEDTNLCAIHAK	KSAPASGGVK	3.52871	WBGene00001883	his-9	ZK131.3	Concise description: his-9 encodes an H3 histone; by homology, HIS-9 is predicted to function as a nucleosome component required for packaging of DNA into chromatin; his-9 is a replication-dependent histone locus that resides in the HIS3 cluster on chromosome II. Provisional description: his-9 encodes an H3 histone; by homology, HIS-9 is predicted to function as a nucleosome component required fo…
181317	WBGene00009531	F38B2.4	F38B2.4	24	5.5131	4	2	0.176	23120	0.865052	INAEGSVDDIFAVVVANLDK	AAGVPIFFIVGGPGSGK	9	4	0.281	23662	1.90178	INAEGSVDDIFAVVVANLDK	AAGVPIFFIVGGPGSGK	1.38342	WBGene00009531	F38B2.4	F38B2.4a	Concise description: F38B2.4 is orthologous to the human gene ADENYLATE KINASE 1 (AK1; OMIM:103000), which when mutated leads to hemolytic anemia. Provisional description: F38B2.4 is orthologous to the human gene ADENYLATE KINASE 1 (AK1; OMIM:103000), which when mutated leads to hemolytic anemia. Detailed description: none available
175895	WBGene00002891	C56G2.6	C1P622	30	5.5103	9	5	0.165	23120	1.94637	TAAFDFTNAAPSAYK	TSFFTPDGAVFAK	9	4	0.165	23662	1.90178	TAAFDFTNAAPSAYK	TSFFTPDGAVFAK	1.92407	WBGene00002891	let-767	C56G2.6a	Concise description: let-767 encodes a steroid dehydrogenase required for embryogenesis, molting, and female reproduction; LET-767 is orthologous to human HSD17B3 (OMIM:605573, mutated in pseudohermaphroditism), HSD17B12 (OMIM:609574), and HSDL1; in vitro, LET-767 catalytically converts androstenedione and estrone into testosterone and estradiol, and in vivo probably catalyzes the synthesis of en…
175716	WBGene00000229	C34E10.6	P46561	68	5.5062	126	26	0.496	23120	27.2491	GQPVADTGDPIKIPVGPETLGR	EGNDLYHEMIEGGVIDLK	127	29	0.595	23662	26.8363	SLQDIIAILGMDELSEEDKLTVSR	IPSAVGYQPTLATDMGSMQER	27.0427	WBGene00000229	atp-2	C34E10.6	Concise description: atp-2 encodes the beta subunit of the soluble, catalytic F1 portion of ATP synthase (mitochondrial respiratory chain [MRC] complex V); atp-2 activity is required for embryonic and larval development past the L3 stage, as well as for normal mobility, pharyngeal pumping, defecation, growth rate, and larval lifespan; in males, atp-2 activity is also required cell autonomously in…
181404	WBGene00003514	T18D3.4	P12845	54	5.4711	80	39	0.217	23120	17.301	VASCDIEHYLLEK	VTLEDQIVQTNPVLEAFGNAK	75	38	0.219	23662	15.8482	VTLEDQIVQTNPVLEAFGNAK	LTEDLQAAEEQNLAANK	16.5746	WBGene00003514	myo-2	T18D3.4	Concise description: myo-2 encodes a muscle-type specific myosin heavy chain isoform; myo-2 is expressed in pharyngeal muscle. Provisional description: myo-2 encodes a muscle-type specific myosin heavy chain isoform; myo-2 is expressed in pharyngeal muscle. Detailed description: none available
174624	WBGene00007352	C06A1.1	P54811	35	5.4532	23	13	0.239	23120	4.97405	LADDVDLEQIANECHGFVGADLASLCSEAALQQIR	EAVVETPNTTWSDIGGLQNVK	21	14	0.258	23662	4.43749	EAVVETPNTTWSDIGGLQNVK	VINQVLTEMDGMNAK	4.70577	WBGene00007352	cdc-48.1	C06A1.1	Concise description: cdc-48.1 encodes a type II AAA ATPase, homologous to yeast Cdc48 and mammalian p97/VCP, that functions as a ubiquitin-selective chaperone; cdc-48.1 acts redundantly with cdc-48.2 and in conjunction with ufd-1 and npl-4 in endoplasmic reticulum-associated protein degradation (ERAD); in addition, CDC-48.1, UFD-2 and chn-1 function together to regulate myosin assembly and muscle…
179190	WBGene00019064	F58G4.1	Q21000	34	5.4375	15	6	0.026	23120	3.24394	LQEKEEEFENTR	ELQFQVDEDKK	13	5	0.026	23662	2.74702	LQEKEEEFENTR	ELQFQVDEDKK	2.99548	WBGene00019064	myo-5	F58G4.1	Concise description: none available Provisional description: none available Detailed description: none available
3565504	WBGene00001684	K10B3.8	P17329	56	5.4343	89	20	0.672	23120	19.2474	VINDNFGIIEGLMTTVHAVTATQK	DPAEIQWGASGADYVVESTGVFTTIEK	78	19	0.569	23662	16.4821	VINDNFGIIEGLMTTVHAVTATQK	GTVAHEGDYLLVAK	17.8648	WBGene00001684	gpd-2	K10B3.8	Concise description: gpd-2 encodes one of four C. elegans glyceraldehyde-3-phosphate dehydrogenases (GAPDHs); by homology, GPD-2 is predicted to reversibly catalyze the oxidation and phosphorylation of glyceraldehyde-3-phosphate to 1,3-diphosphoglycerate during glycolysis; in C. elegans, GPD-2 and GPD-3 constitute the major GAPDH isoenzymes and are expressed at highest levels during postembryonic…
177386	WBGene00019060	F58F9.7	F58F9.7	6	5.4341	6	4	0.057	23120	1.29758	EIEDQSVKPVLQK	AAVEGEEHVR								0.64879	WBGene00019060	F58F9.7	F58F9.7	Concise description: none available Provisional description: none available Detailed description: none available
174140	WBGene00000198	C15F1.6	Q9N5Y2	24	5.4264	5	2	0.062	23120	1.08131	LSDLGLSSQK	GKPLADDQK	6	3	0.091	23662	1.26786	LSDLGLSSQK	DLGPQIAWK	1.17458	WBGene00000198	art-1	C15F1.6	Concise description: a protein similar to synaptic glycoprotein SC2 from mammals. Provisional description: a protein similar to synaptic glycoprotein SC2 from mammals. Detailed description: none available
177128	WBGene00003129	Y37E11AL.7	U4PER3	20	5.4181	2	2	0.054	23120	0.432526	VLTDEEKEGLK	VVHEAAIER	2	2	0.059	23662	0.422619	ACGPGVTTEEIDR	CIGCQKPAK	0.427573	WBGene00003129	map-1	Y37E11AL.7	Concise description: none available Provisional description: none available Detailed description: none available
179963	WBGene00003982	R11H6.1	O18000	25	5.4149	5	2	0.044	23120	1.08131	IVPDMDPEQVNR	GSPNVFKPR	8	4	0.08	23662	1.69047	IVPDMDPEQVNR	NNIWNYVEGVK	1.38589	WBGene00003982	pes-9	R11H6.1	Concise description: pes-9 encodes a zinc metallopeptidase; pes-9 was originally identified in a promoter trap screen for sequences that direct reporter gene expression in specific cell types during C. elegans development; pes-9 sequences direct expression in a limited number of cells in the early embryo and in putative head and tail hypodermal cells in adults; after some confusion, the pes-9 rep…
178640	WBGene00006794	C38C3.5	Q07749	27	5.3994	9	4	0.303	23120	1.94637	IDKNDTAIVVEK	QGAEGTSTLNK	8	5	0.362	23662	1.69047	IDKNDTAIVVEK	QGAEGTSTLNK	1.81842	WBGene00006794	unc-60	C38C3.5a	Concise description: unc-60 encodes orthologs of actin depolymerizing factor/cofilin, actin-binding proteins that regulate actin filament dynamics; one UNC-60 isoform, UNC-60A, primarily binds G-actin, depolymerizes actin filaments, and inhibits actin polymerization; UNC-60A is essential during early embryonic development for polar body extrusion, cytokinesis, and embryonic patterning; UNC-60B, w…
172539	WBGene00006518	F27D4.5	Q93619	24	5.3982	4	4	0.142	23120	0.865052	MNLMQSVNEAMR	CFLNLESPIDR	5	5	0.205	23662	1.05655	MNLMQSVNEAMR	LASEDVPTGDYTIPLGQAETVR	0.960801	WBGene00006518	tag-173	F27D4.5	Concise description: tag-173/F27D4.5 is orthologous to the human gene BRANCHED CHAIN KETO ACID DEHYDROGENASE E1, ALPHA POLYPEPTIDE (BCKDHB; OMIM:248600), which when mutated leads to maple syrup urine disease, type 1a; F27D4.5 protein is predicted to be mitochondrial. Provisional description: This gene encodes a protein predicted by Eisenberg and coworkers, with 68 percentage accuracy, to be mitoc…
178071	WBGene00003148	H21P03.1	Q9XTV4	25	5.3895	4	2	0.192	23120	0.865052	DLSTQINEKPQVVGEYESGK	AVPNQQIMAK	3	1	0.128	23662	0.633928	DLSTQINEKPQVVGEYESGK	NA	0.74949	WBGene00003148	mbf-1	H21P03.1	Concise description: none available Provisional description: none available Detailed description: none available
174844	WBGene00006601	Y17G7B.7	Q10657	34	5.3884	15	7	0.287	23120	3.24394	TASGEQAQEVHEWIR	GAFTGEISPAMIK	20	8	0.397	23662	4.22619	TASGEQAQEVHEWIR	IIYGGSVTADNAAELGK	3.73507	WBGene00006601	tpi-1	Y17G7B.7	Concise description: tpi-1 encodes a putative triosephosphate isomerase orthologous to human TPI1 (OMIM:190450, mutated in TPI deficiency) and Drosophila WASTED AWAY; loss of tpi-1 activity via RNAi results in increased resistance to exogenous oxidants and shortening of natural adult lifespan, both presumably due to alterations in the redox state of cells. Provisional description: tpi-1 encodes a…
175524	WBGene00002202	C03C10.1	P42168	31	5.3612	10	4	0.138	23120	2.16263	TVLMLADQMIGR	FDESPDYMYLR	8	3	0.097	23662	1.69047	TVLMLADQMIGR	FDESPDYMYLR	1.92655	WBGene00002202	kin-19	C03C10.1	Concise description: kin-19 encodes a serine/threonine kinase orthologous to Casein Kinase I (CKI); in the early embryo, kin-19 is a component of both the non-canonical Wnt signaling pathway that regulates endoderm formation in the early embryo as well as the Wnt spindle orientation pathway; during larval development, kin-19 functions in a non-canonical Wnt signaling pathway to control asymmetric…
180535	WBGene00004423	F07D10.1	Q19162	35	5.3569	17	4	0.199	23120	3.67647	VLEQLTGQTPVFSK	YDGIILPPKPK	22	5	0.235	23662	4.6488	VLEQLTGQTPVFSK	YDGIILPPKPK	4.16263	WBGene00004423	rpl-11.2	F07D10.1	Concise description: rpl-11.2 encodes a large ribosomal subunit L11 protein; by homology, RPL-11.2 is predicted to function in protein biosynthesis. Provisional description: This gene encodes a protein predicted by Eisenberg and coworkers, with 52 percentage accuracy, to be mitochondrial. Detailed description: none available
177779	WBGene00009542	F38E11.5	Q20168	32	5.3425	10	7	0.065	23120	2.16263	SFEVCDVPVR	HSEIQQANLK	13	7	0.076	23662	2.74702	TISTEESEAIQDGER	SELLLAGECLGR	2.45483	WBGene00009542	F38E11.5	F38E11.5	Concise description: F38E11.5 encodes a beta' (beta-prime) subunit of the coatomer (COPI) complex; in mass RNAi assays, F38E11.5 is required for fertility and general health. Provisional description: F38E11.5 encodes a beta' (beta-prime) subunit of the coatomer (COPI) complex; in mass RNAi assays, F38E11.5 is required for fertility and general health. Detailed description: none available
180344	WBGene00007122	B0250.5	B0250.5	34	5.3205	13	7	0.355	23120	2.81142	AEGCEVAAHPADIAAASK	TIQPGTLCMDSSTIDQIVSLEVAQAAALLK	18	9	0.455	23662	3.80357	TIQPGTLCMDSSTIDQIVSLEVAQAAALLK	AEGCEVAAHPADIAAASK	3.30749	WBGene00007122	B0250.5	B0250.5	Concise description: none available Provisional description: none available Detailed description: none available
179796	WBGene00001137	B0365.3	P90735	46	5.31	39	20	0.243	23120	8.43426	SVGIISDGTETVEDIAIR	QGQIVAVTGDGVNDSPALK	39	19	0.239	23662	8.24106	QGQIVAVTGDGVNDSPALK	SVGIISDGTETVEDIAIR	8.33766	WBGene00001137	eat-6	B0365.3	Concise description: eat-6 encodes an ortholog of the alpha subunit of a sodium/potassium ATPase, which in turn affects Na+,K(+)-ATPase activity of membranes by affecting the level of the phosphorylated intermediate of the Na+,K(+)-ATPase; EAT-6 affects relaxation of the pharyngeal muscles, fertility (and thus affects feeding); EAT-6 also affects body length, life span, and ASE, ASI and ASJ axona…
177202	WBGene00021286	Y24D9A.8	Y24D9A.8	25	5.2676	5	4	0.147	23120	1.08131	QLAAETELAPVVLSTSHAK	VSTEVDAR	7	5	0.201	23662	1.47916	GLVGCDLLTISPALLK	VSTEVDAR	1.28024	WBGene00021286	Y24D9A.8	Y24D9A.8a	Concise description: Y24D9A.8 is orthologous to the human gene Transaldolase 1 (TALDO1), a key enzyme in the pentose phosphate pathway, which provides ribose-5-phosphate for nucleic acid synthesis and NADPH for lipid biosynthesis. Provisional description: Y24D9A.8 is orthologous to the human gene Transaldolase 1 (TALDO1), a key enzyme in the pentose phosphate pathway, which provides ribose-5-phos…
178873	WBGene00002010	C37H5.8	P11141	65	5.2605	105	28	0.399	23120	22.7076	ELVEVINQAEGIIHDTEAK	VINEPTAAALAYGLDKDAGDK	106	26	0.452	23662	22.3988	VINEPTAAALAYGLDKDAGDK	ELVEVINQAEGIIHDTEAK	22.5532	WBGene00002010	hsp-6	C37H5.8	Concise description: hsp-6 encodes a nuclear-encoded mitochondrion-specific chaperone that is a member of the DnaK/Hsp70 superfamily of molecular chaperones; hsp-6 is involved in the mitochondrial unfolded protein response, as hsp-6 expression, normally broadly detected from the L1 larval through adult stages of development, is greatly increased in response to treatments that disrupt mitochondria…
175820	WBGene00000115	F01F1.6	P46562	42	5.2471	32	11	0.217	23120	6.92042	IGCPLDSNTIIGPLHNQQAVGK	ELGLTENNAGVFHGK	29	12	0.281	23662	6.12797	ELGLTENNAGVFHGK	IGCPLDSNTIIGPLHNQQAVGK	6.52419	WBGene00000115	alh-9	F01F1.6	Concise description: alh-9 encodes a highly conserved aldehyde dehydrogenase that is a member of the ALDH7 (antiquitin/ATQ) family of aldehyde dehydrogenases, mutations in which are associated with pyridoxine-dependent epilepsy (OMIM:107323); by sequence similarity, ALH-9 is predicted to catalyze aldehyde oxidation; loss of alh-9 activity via RNAi results in embryonic and larval lethality, slow g…
174166	WBGene00004447	F10E7.7	P49180	51	5.2159	45	11	0.645	23120	9.73183	ITRPHGNAGAVR	TQSEHTSLLK	51	9	0.645	23662	10.7768	ITRPHGNAGAVR	TQSEHTSLLK	10.2543	WBGene00004447	rpl-33	F10E7.7	Concise description: rpl-33 encodes a large ribosomal subunit L35a protein. Provisional description: rpl-33 encodes a large ribosomal subunit L35a protein. Detailed description: none available
175768	WBGene00003371	F09F7.2	G8JY79	70	5.2151	91	18	0.961	23120	19.6799	EIFNLYDEELDGKIDGTQVGDVAR	LSADEADELLKGVEDGEGMVK	92	19	0.961	23662	19.4405	EIFNLYDEELDGKIDGTQVGDVAR	LSADEADELLKGVEDGEGMVK	19.5602	WBGene00003371	mlc-3	F09F7.2a	Concise description: mlc-3 encodes an essential myosin light chain; large-scale RNAi screens indicate that mlc-3 activity is required for both embryonic and postembryonic development, as well as for normal locomotion and egg laying. Provisional description: mlc-3 encodes an essential myosin light chain; large-scale RNAi screens indicate that mlc-3 activity is required for both embryonic and poste…
174259	WBGene00015514	C06A8.3	C06A8.3	49	5.2043	28	7	0.642	23120	6.05536	GQQGQAEAAHQAAVSNFSPAAK	NATPAQLQSFQQLIQANGHLTETALDGK	25	8	0.642	23662	5.28273	GQQGQAEAAHQAAVSNFSPAAK	NATPAQLQSFQQLIQANGHLTETALDGK	5.66904	WBGene00015514	C06A8.3	C06A8.3	Concise description: C06A8.3 encodes, along with ZK970.7, one of two C. elegans proteins with similarity to the Onchocerca volvulus Ov17 hypodermal antigen. Provisional description: C06A8.3 encodes, along with ZK970.7, one of two C. elegans proteins with similarity to the Onchocerca volvulus Ov17 hypodermal antigen. Detailed description: none available
3565440	WBGene00002077	C53D5.6	Q9N5V3	38	5.2042	19	9	0.101	23120	4.109	IIGNVPLPAEAYGK	FCSILGADFAPFLPVVMDPVLR	17	6	0.071	23662	3.59226	IIGNVPLPAEAYGK	FCSILGADFAPFLPVVMDPVLR	3.85063	WBGene00002077	imb-3	C53D5.6	Concise description: imb-3 encodes an importin-beta-like protein orthologous to Drosophila, vertebrate, and yeast importin/karyopherin-beta3; IMB-3 is predicted to function as a nuclear transport factor that, with the RAN-1 GTPase, regulates nuclear import of ribosomal proteins; in C. elegans, IMB-3 is essential for embryogenesis and germline development, and may also be required for normal poste…
174963	WBGene00012375	W09H1.5	mecr-1	18	5.2016	1	1	0.035	23120	0.216263	VISVGSNVSSIK	NA	3	3	0.084	23662	0.633928	VISVGSNVSSIK	LALNCVGGR	0.425096	WBGene00012375	mecr-1	W09H1.5	Concise description: none available Provisional description: none available Detailed description: none available
177108	WBGene00015413	C04C3.3	O44451	32	5.2008	10	5	0.256	23120	2.16263	VTGVDVPMPYTQTLEAAALPTAEHVVK	VFLMGEEVAQYDGAYK	13	6	0.287	23662	2.74702	GPNGAAAGVAAQHSQDFSAWYAHCPGLK	VTGVDVPMPYTQTLEAAALPTAEHVVK	2.45483	WBGene00015413	pdhb-1	C04C3.3	Concise description: C04C3.3 encodes the C. elegans ortholog of the pyruvate dehydrogenase complex E1 beta subunit (PDHB); by homology to mammalian enzymes, the product of C04C3.3 is predicted to function in mitochondria to catalyze the irreversible decarboxylation of pyruvate to acetyl-CoA. Provisional description: C04C3.3 encodes the C. elegans ortholog of the pyruvate dehydrogenase complex E1 …
179671	WBGene00001088	ZK863.6	Q10661	32	5.159	7	3	0.268	23120	1.51384	QYLDSTVVPILLQGLGALAK	ADQTASAEVATEK	7	2	0.276	23662	1.47916	QYLDSTVVPILLQGLGALAK	MADQTASAEVATEK	1.4965	WBGene00001088	dpy-30	ZK863.6	Concise description: The dpy-30 gene encodes an essential nuclear protein required for hermaphrodite dosage compensation as well as normal male development; DPY-30 is expressed ubiquitously throughout development and can be detected in two different multiprotein complexes: the SDC complex involved in dosage compensation and a second complex containing NOX-1 (a WD repeat-containing protein) and AS…
181280	WBGene00009812	F47B10.1	suca-1	51	5.1585	49	19	0.428	23120	10.5969	VPPFGVAQDAETAFSEAK	DCEQQASEIIEK	55	17	0.441	23662	11.622	LHGGEPANFLDVGGGATVEQVTEAFK	GSDATLVEINPMAEDVNGDVYCMDCK	11.1095	WBGene00009812	suca-1	F47B10.1	Concise description: none available Provisional description: none available Detailed description: none available
173134	WBGene00010419	H28O16.1	H28O16.1	70	5.145	120	33	0.546	23120	25.9516	EVAAFAQFGSDLDASTQQLLNR	ILGTETGINLEETGK	114	34	0.562	23662	24.0893	EVAAFAQFGSDLDASTQQLLNR	ILGTETGINLEETGK	25.0205	WBGene00010419	H28O16.1	H28O16.1a	Concise description: none available Provisional description: none available Detailed description: none available
179095	WBGene00003786	VC5.3	G5EF32	35	5.1215	15	12	0.099	23120	3.24394	WMTPEQLGDINALK	VYFTPLMTSEELDK	17	10	0.096	23662	3.59226	WMTPEQLGDINALK	VYFTPLMTSDELEK	3.4181	WBGene00003786	npa-1	VC5.3a	Concise description: npa-1 encodes a large polyprotein precursor that is posttranslationally cleaved to multiple units of ~14.5kDa, each of which is a strong binding protein for fatty acids and retinol (Vitamin A); the lipid binding sites of NPA-1-derived peptides are unusually apolar; NPA-1-derived peptides probably are carrier proteins that enable distribution of these lipids within nematodes; …
177281	WBGene00015326	C02B10.1	G5EEH6	30	5.077	8	5	0.165	23120	1.7301	LADMYTTLNASR	LISGEHMGALAMSEAQAGSDVVSMK	10	7	0.27	23662	2.11309	LVLSGGPLGLMQAACDIAFDYAHQR	LADMYTTLNASR	1.92159	WBGene00015326	ivd-1	C02B10.1	Concise description: ivd-1 encodes an isovaleryl-CoA dehydrogenase; this function has been verified by both sequence homology and direct biochemical assay. Provisional description: C02B10.1 is an ortholog of the human gene ISOVALERYL COENZYME A DEHYDROGENASE (IVD; OMIM:243500), which when mutated leads to isovalericacidemia (OMIM:243500). Isovaleryl-CoA dehydrogenase (IVD) is a flavoenzyme, which…
177891	WBGene00011775	T14G10.5	T14G10.5	29	5.0742	10	6	0.073	23120	2.16263	VPQLVEEEEKPK	TEATEAFFGVTK	9	5	0.063	23662	1.90178	VPQLVEEEEKPK	TEATEAFFGVTK	2.0322	WBGene00011775	T14G10.5	T14G10.5a	Concise description: T14G10.5 encodes a gamma subunit of the coatomer (COPI) complex; in mass RNAi assays, T14G10.5 is required for locomotion, fertility, normally rapid growth, and general health. Provisional description: T14G10.5 encodes a gamma subunit of the coatomer (COPI) complex; in mass RNAi assays, T14G10.5 is required for locomotion, fertility, normally rapid growth, and general health.…
175141	WBGene00012179	W01D2.1	W01D2.1	48	5.0506	32	6	0.413	23120	6.92042	CASCGYPDAK	SSFHIQK	31	6	0.413	23662	6.55059	CASCGYPDAK	SSFHIQK	6.7355	WBGene00012179	W01D2.1	W01D2.1	Concise description: none available Provisional description: none available Detailed description: none available
174333	WBGene00001840	C26D10.2	Q18212	37	5.0329	13	7	0.16	23120	2.81142	LANDCPHIVVGTPGR	ILVATDLFGR	12	6	0.141	23662	2.53571	LANDCPHIVVGTPGR	DFLLKPEILR	2.67356	WBGene00001840	hel-1	C26D10.2a	Concise description: hel-1 encodes an ortholog of human 56-kD U2AF65 associated protein (UAP56) that is required for exporting mRNAs from the nucleus; unlike animals with RNAi against several other splicing factors, hel-1(RNAi) animals fail to export transgenic GFP mRNA from the nucleus; conversely, hel-1 overexpression is lethal, with failed transgene expression as well. Provisional description:…
176281	WBGene00001749	R107.7	P10299	21	5.0278	4	3	0.135	23120	0.865052	VTYEQWADIKPK	FAERPNIK	2	2	0.096	23662	0.422619	VTYEQWADIKPK	FAERPNIK	0.643836	WBGene00001749	gst-1	R107.7	Concise description: gst-1 encodes a putative glutathione S-transferase of the pi class; GST-1 is required for sperm to normally migrate towards a PUFA-based signal exuded by oocytes; gst-1(RNAi) hermaphrodites are infertile, both through aberrant loss of their own sperm and through failure of males to effectively inseminate them. Provisional description: gst-1 encodes a putative glutathione S-tr…
182812	WBGene00016011	C23G10.2	C23G10.2	25	5.0164	5	3	0.281	23120	1.08131	EGVVEQTHQSLK	QIISSANAPGAIGPYSQAVR	7	3	0.281	23662	1.47916	EGVVEQTHQSLK	QIISSANAPGAIGPYSQAVR	1.28024	WBGene00016011	C23G10.2	C23G10.2a	Concise description: none available Provisional description: none available Detailed description: none available
178988	WBGene00004502	F29G9.5	O16368	40	5.0044	23	12	0.305	23120	4.97405	APQETYADVGGLDQQIQEIK	TMLELLNQLDGFDSR	24	11	0.298	23662	5.07142	APQETYADVGGLDQQIQEIK	AVANQTSATFLR	5.02273	WBGene00004502	rpt-2	F29G9.5	Concise description: none available Provisional description: none available Detailed description: none available
177212	WBGene00019947	R08C7.3	Q27511	39	4.9984	7	3	0.179	23120	1.51384	AGLQFPVGR	AGLQFPVGR	5	2	0.179	23662	1.05655	AGLQFPVGR	GAPVPGKPGAPGQGPQ	1.2852	WBGene00019947	htz-1	R08C7.3	Concise description: htz-1 encodes the C. elegans ortholog of the H2A.Z histone variant; htz-1 is an essential gene and during development, HTZ-1 functions with the PHA-4/FoxA transcription factor and the MYS-1/TIP60-SSL-1/SWR1 remodeling complex to regulate gene expression during pharyngeal (foregut) organogenesis; a YFP::HTZ-1 fusion protein localizes to pharyngeal gene promoters at the onset o…
180935	WBGene00018174	F38B6.4	F38B6.4	24	4.9961	5	4	0.051	23120	1.08131	IAQNIQFTGK	SVCGVVLASGNYPK	4	3	0.037	23662	0.845237	IAQNIQFTGK	SVCGVVLASGNYPK	0.963274	WBGene00018174	F38B6.4	F38B6.4	Concise description: none available Provisional description: none available Detailed description: none available
176848	WBGene00003932	T21D12.4	O16785	17	4.9853	2	2	0.075	23120	0.432526	EALDQSLVPVLAR	ITEQITTVQTELAPK	1	1	0.037	23662	0.211309	IEVPEVSQSEEGQR	NA	0.321918	WBGene00003932	pat-6	T21D12.4	Concise description: pat-6 encodes the worm ortholog of alpha-parvin; it is required for muscle assembly and function, with mutations leading to embryonic lethality. Provisional description: pat-6 encodes the worm ortholog of alpha-parvin; it is required for muscle assembly and function, with mutations leading to embryonic lethality. Detailed description: none available
180997	WBGene00015565	C07D8.6	C07D8.6	25	4.9491	5	3	0.142	23120	1.08131	LDWAPAPSDLQDQNVLALAEK	AVGVSNWNNDQISR	6	4	0.196	23662	1.26786	LIDTASVYQNEEAIGTAIK	AVGVSNWNNDQISR	1.17458	WBGene00015565	C07D8.6	C07D8.6	Concise description: none available Provisional description: none available Detailed description: none available
24104866	WBGene00020366	T08G2.3	Q22347	36	4.9298	15	8	0.201	23120	3.24394	VPAENVLGAPGAGFK	IYQIYEGTSQIQR	17	9	0.261	23662	3.59226	VPAENVLGAPGAGFK	FDESGEFPWEIVR	3.4181	WBGene00020366	acdh-10	T08G2.3	Concise description: T08G2.3 is orthologous to the human gene ACYL-CoA DEHYDROGENASE, MEDIUM-CHAIN (ACADM; OMIM:607008), which when mutated leads to MCAD deficiency. Provisional description: T08G2.3 is orthologous to the human gene ACYL-CoA DEHYDROGENASE, MEDIUM-CHAIN (ACADM; OMIM:607008), which when mutated leads to MCAD deficiency. Detailed description: none available
174180	WBGene00017125	E04F6.5	Q19057	32	4.9185	14	9	0.163	23120	3.02768	GSNTTEVHFDNLK	IFEGANDVLR	11	7	0.191	23662	2.3244	GSNTTEVHFDNLK	IPVENLLGK	2.67604	WBGene00017125	acdh-12	E04F6.5a	Concise description: E04F6.5 is orthologous to the human gene ACYL-CoA DEHYDROGENASE, VERY LONG-CHAIN (OMIM:201475), which when mutated leads to VLCAD deficiency, an inborn error of mitochondrial beta-oxidation. Provisional description: E04F6.5 is orthologous to the human gene ACYL-CoA DEHYDROGENASE, VERY LONG-CHAIN (OMIM:201475), which when mutated leads to VLCAD deficiency, an inborn error of m…
3565996	WBGene00011510	T05H10.6	Q8I111	32	4.9117	9	5	0.186	23120	1.94637	IATSDGVLPPEALYADIYHNTPAQEIR	LDNGPNTSVTLNR	13	7	0.225	23662	2.74702	IATSDGVLPPEALYADIYHNTPAQEIR	LDNGPNTSVTLNR	2.34669	WBGene00011510	pdha-1	T05H10.6a	Concise description: T05H10.6 encodes an ortholog of the human gene PYRUVATE DEHYDROGENASE (LIPOAMIDE) ALPHA 1 (PDHA1; OMIM:312170), which when mutated leads to Leigh syndrome (OMIM:256000). Provisional description: Proteins localized to a given organelle by experiments tend to share a characteristic phylogenetic distribution of their homologs, called a phylogenetic profile. For instance, mitocho…
172397	WBGene00006819	F08B6.4	Q6LD30	42	4.9028	25	10	0.43	23120	5.40657	VAQNPADLAELPEEK	NTTFEAEGGELPYEAMK	23	11	0.412	23662	4.86011	NTTFEAEGGELPYEAMK	SENLQEIPEDIANR	5.13334	WBGene00006819	unc-87	F08B6.4a	Concise description: unc-87 encodes, through alternative splicing, two proteins that are required to maintain the structure of myofilaments in body wall muscle cells; UNC-87 proteins resemble the C-terminal repeat region of calponin but have no obvious orthologs outside of nematodes; in vitro, UNC-87 proteins exist as monomers in solution, associate with thin (F-actin) filaments but not with mono…
172442	WBGene00003815	F22D6.3	Q19722	23	4.8908	5	5	0.103	23120	1.08131	FVYGEDIAEAAER	MTDTIGVPILLNR	3	3	0.066	23662	0.633928	FVYGEDIAEAAER	LLADPVTK	0.857619	WBGene00003815	nars-1	F22D6.3a	Concise description: nrs-1 encodes an asparaginyl-tRNA synthetase that is required for embryonic viability and fertility Provisional description: nrs-1 encodes an asparaginyl-tRNA synthetase that is required for embryonic viability and fertility Detailed description: none available
3565888	WBGene00016981	C56G2.7	C56G2.7	37	4.8846	21	10	0.289	23120	4.54152	LFWIQDSTPDVDKDLVK	SVASSSGHIVEFK	20	9	0.278	23662	4.22619	LFWIQDSTPDVDKDLVK	SVASSSGHIVEFK	4.38385	WBGene00016981	C56G2.7	C56G2.7	Concise description: none available Provisional description: none available Detailed description: none available
180986	WBGene00018519	F46H5.3	F46H5.3	64	4.8518	87	26	0.802	23120	18.8149	QMYDGIAHLIALEK	IISMQEGGNVGQVLER	87	26	0.805	23662	18.3839	QMYDGIAHLIALEK	SLQGYPFNPCLSEANYLEMESK	18.5994	WBGene00018519	F46H5.3	F46H5.3a	Concise description: none available Provisional description: none available Detailed description: none available
3564970	WBGene00013025	Y49A3A.2	Q9XW92	64	4.8383	88	32	0.543	23120	19.0311	EILQEEEDLSEIVQLVGK	AAESSYGFVYGVSGPVVTAEK	85	29	0.507	23662	17.9613	EILQEEEDLSEIVQLVGK	MAAESSYGFVYGVSGPVVTAEK	18.4962	WBGene00013025	vha-13	Y49A3A.2	Concise description: vha-13 encodes an ortholog of subunit A of the cytoplasmic (V1) domain of vacuolar proton-translocating ATPase (V-ATPase); VHA-13 is predicted to hydrolyse ATP as part of a cytosolic VHA-12/VHA-13 heterohexamer, whose activity drives the V-ATPase rotor; VHA-13 levels are lowered in mutants with either abnormally low or abnormally high calcineurin levels, and elevated in mutan…
176661	WBGene00004506	Y49E10.1	Q9XTT9	41	4.8316	26	12	0.356	23120	5.62284	IAEQIPGASGAEVK	SVCTEAGMFALR	21	9	0.272	23662	4.43749	TMLELLNQLDGFEATK	VEGSSGGDSEVQR	5.03017	WBGene00004506	rpt-6	Y49E10.1	Concise description: rpt-6 encodes a triple A ATPase that is a subunit of the 26S proteasome 19S regulatory particle (RP) base subcomplex; RPT-6 is required for embryonic and larval development and by homology, is predicted to function in unfolding protein substrates and translocating them into the core proteolytic particle (CP) of the proteasome. Provisional description: rpt-6 encodes a triple A…
180017	WBGene00007235	C01G10.8	C01G10.8	21	4.8208	2	2	0.076	23120	0.432526	DVPTHLAEETQQGLDR	VKPQVVTTGK	3	1	0.029	23662	0.633928	VKPQVVTTGK	NA	0.533227	WBGene00007235	C01G10.8	C01G10.8	Concise description: none available Provisional description: none available Detailed description: none available
174128	WBGene00016630	C44B7.10	Q18599	70	4.8116	94	20	0.599	23120	20.3287	GAAIGNDGLGKPIIALPSISK	SGDNVFVHGIAATPTPLLQSLSEHAVANNLNK	108	24	0.654	23662	22.8214	SGDNVFVHGIAATPTPLLQSLSEHAVANNLNK	GAAIGNDGLGKPIIALPSISK	21.5751	WBGene00016630	C44B7.10	C44B7.10	Concise description: none available Provisional description: none available Detailed description: none available
181528	WBGene00007993	C37E2.1	Q93353	44	4.7885	18	7	0.245	23120	3.89273	SSSIENAVESIGR	DLGGYATTVDFADAVIDK	20	9	0.293	23662	4.22619	DLGGYATTVDFADAVIDK	SSSIENAVESIGR	4.05946	WBGene00007993	idhb-1	C37E2.1	Concise description: C37E2.1 encodes the C. elegans homolog of the beta subunit of an NAD+-dependent mitochondrial isocitrate dehydrogenase; by homology, the product of C37E2.1 is predicted to catalyze the formation of alpha-ketoglutarate from isocitrate as part of the citric acid cycle. Provisional description: C37E2.1 encodes the C. elegans homolog of the beta subunit of an NAD+-dependent mitoc…
173744	WBGene00004467	K07D4.3	O76577	26	4.782	4	3	0.099	23120	0.865052	AVAVVVDPIQSVK	NMTDQELAIK	8	4	0.131	23662	1.69047	AVAVVVDPIQSVK	NMTDQELAIK	1.27776	WBGene00004467	rpn-11	K07D4.3	Concise description: rpn-11 encodes a predicted non-ATPase subunit of the 19S regulatory complex of the proteasome that affects adult viability, osmoregulation, embryonic viability, and movement; interacts with itself, RPN-9, and F55A11.3, based on yeast two-hybrid assays. Provisional description: rpn-11 encodes a predicted non-ATPase subunit of the 19S regulatory complex of the proteasome that a…
176473	WBGene00001993	T21C12.2	Q22633	36	4.7673	19	5	0.176	23120	4.109	AAGATIVHDITEESDADGSIR	TYGETDHTLLER	15	5	0.176	23662	3.16964	AAGATIVHDITEESDADGSIR	GCEFLSIPSSYYDNLK	3.63932	WBGene00001993	hpd-1	T21C12.2	Concise description: hpd-1 encodes a putative 4-hydroxyphenylpyruvate dioxygenase required for normally short lifespan and for negative regulation of the dauer larval stage, with loss of hpd-1 function prolonging lifespan and promoting dauer formation; hpd-1 is a (perhaps evolutionarily conserved) target of transcriptional activation by DAF-16; HPD-1 is orthologous to human HPD (OMIM:609695, muta…
180027	WBGene00000883	Y75B12B.2	P52015	44	4.7583	34	11	0.596	23120	7.35294	HTGPGVLSMANAGPNTNGSQFFLCTVK	HTGPGVLSMANAGPNTNGSQFFLCTVK	29	8	0.526	23662	6.12797	HTGPGVLSMANAGPNTNGSQFFLCTVK	HTGPGVLSMANAGPNTNGSQFFLCTVK	6.74045	WBGene00000883	cyn-7	Y75B12B.2	Concise description: cyn-7 encodes a cyclophilin A isoform; while not tested for peptidyl-prolyl isomerase activity in vitro, it is very similar to CYN-3 and closely resembles the prototypical CypA, and is therefore likely to be a member of the cytosolic CsA-binding cyclophilin subfamily; CYN-7 was required for embryonic viability in one set of mass RNAi assays. Provisional description: CYN-7 has…
180603	WBGene00004951	K10B3.10	G4S034	45	4.7405	30	20	0.105	23120	6.48789	LIQGQHYAADDVAER	DQLVSSEHQQSPAIEK	31	18	0.093	23662	6.55059	LIQGQHYAADDVAER	IAAIIQAGNNLIENAK	6.51924	WBGene00004951	spc-1	K10B3.10a	Concise description: spc-1 encodes the C. elegans alpha spectrin ortholog; during development, spc-1 activity is required for body morphogenesis, formation of body wall muscles, locomotion, and larval development. Provisional description: spc-1 encodes the C. elegans alpha spectrin ortholog; during development, spc-1 activity is required for body morphogenesis, formation of body wall muscles, loc…
172535	WBGene00009187	F27D4.1	F27D4.1	42	4.6968	20	9	0.352	23120	4.32526	LDVSSISDVTEVHSADSFTR	AAVDAGYVPNDMQVGQTGK	26	11	0.419	23662	5.49404	LDVSSISDVTEVHSADSFTR	EGGSGAVENAPSADIK	4.90965	WBGene00009187	F27D4.1	F27D4.1	Concise description: The F27D4.1 gene encodes an ortholog of the human gene ELECTRON-TRANSFER-FLAVOPROTEIN, ALPHA POLYPEPTIDE (ETFA), which when mutated leads to glutaricaciduria type IIA (OMIM:231680). Provisional description: The F27D4.1 gene encodes an ortholog of the human gene ELECTRON-TRANSFER-FLAVOPROTEIN, ALPHA POLYPEPTIDE (ETFA), which when mutated leads to glutaricaciduria type IIA (OMI…
175316	WBGene00002025	Y22D7AL.5	G8JYF5	61	4.694	72	27	0.548	23120	15.5709	IEHITDEIEQSTSDYEK	IEDITANDLGEVDEVTITK	76	30	0.588	23662	16.0595	IEHITDEIEQSTSDYEK	QAMLVGVNLLADAVSVTMGPK	15.8152	WBGene00002025	hsp-60	Y22D7AL.5a	Concise description: hsp-60 encodes a nuclear-encoded mitochondrion-specific chaperone that is a member of the GroE/Hsp10/60 superfamily of molecular chaperones; hsp-60 is involved in the mitochondrial unfolded protein response, as hsp-60 expression, normally broadly detected during development, is greatly increased in response to treatments that disrupt mitochondrial protein handling; loss of hs…
174881	WBGene00013284	Y57A10C.6	G5EDP2	28	4.6841	5	4	0.131	23120	1.08131	MAPGSLENLAAPIDDR	LGTDEPSVFAENSNIK	7	4	0.121	23662	1.47916	MAPGSLENLAAPIDDR	EAVTTALDDCK	1.28024	WBGene00013284	daf-22	Y57A10C.6	Concise description: daf-22 encodes the C. elegans ortholog of human sterol carrier protein SCP2, which catalyzes the final step in peroxisomal fatty acid beta-oxidation; in C. elegans, DAF-22 activity is required for dauer pheromone biosynthesis; daf-22 mutant animals cannot produce dauer pheromone, but can synthesize weakly active longer-chain fatty acid derivatives; in synthesizing dauer phero…
177146	WBGene00018145	F37C4.5	F37C4.5	56	4.6741	45	17	0.331	23120	9.73183	VHLNTPEAVEVDEASVEPTVGAAITPEK	TFQVELAHGYNEVK	46	19	0.388	23662	9.72023	VHLNTPEAVEVDEASVEPTVGAAITPEK	TFQVELAHGYNEVK	9.72603	WBGene00018145	F37C4.5	F37C4.5a	Concise description: none available Provisional description: none available Detailed description: none available
176773	WBGene00006439	T27E9.1	Q86CZ9	64	4.6068	73	21	0.617	23120	15.7872	FFAGNLASGGAAGATSLCFVYPLDFAR	GTGGALVLAIYDEIQK	84	22	0.61	23662	17.75	GTGGALVLAIYDEIQK	FLIDLASGGTAAAVSK	16.7686	WBGene00006439	ant-1.1	T27E9.1a	Concise description: ant-1.1 encodes one of four C. elegans mitochondrial adenine nucleotide transporters; by homology, ANT-1.1 is predicted to facilitate ADP/ATP exchange between the cytosol and mitochondria; ant-1.1 is an essential gene, required for embryogenesis as well as for normal postembryonic body size and adult lifespan; in addition, ANT-1.1 plays a critical role in promoting somatic an…
172715	WBGene00009342	F32H2.5	P91871	46	4.6029	18	11	0.052	23120	3.89273	VDLSQNSSLGMAK	SPETVAFACEAMHSK	20	12	0.065	23662	4.22619	VDLSQNSSLGMAK	SSSVTVEHINR	4.05946	WBGene00009342	fasn-1	F32H2.5	Concise description: fasn-1 encodes a fatty acid synthase, orthologous to human FASN (OMIM:600212); CEP-1 is required for fully normal fasn-1 expression in vivo; CEP-1 drives transcription of luciferase reporters whose promoters contains either of two putative CEP-1 binding sites (FAS-T1 and FAS-T2) found in the fasn-1 gene, and this activity is partially lost by mutation of conserved CEP-1 resid…
181617	WBGene00010357	H03A11.2	H03A11.2	40	4.5944	10	3	0.031	23120	2.16263	TQNQEDFTHISGER	ILQGDGQQFEAR	11	3	0.031	23662	2.3244	TQNQEDFTHISGER	ILQGDGQQFEAR	2.24351	WBGene00010357	H03A11.2	H03A11.2	Concise description: none available Provisional description: none available Detailed description: none available
178387	WBGene00010794	LLC1.3	O17953	50	4.5858	44	15	0.384	23120	9.51557	QIVSSTGALSLGQVPK	NATLGGTCLNVGCIPSK	41	14	0.366	23662	8.66368	VGHVEGFATIVGPNTVQAK	AEEQLKQEGVAYK	9.08962	WBGene00010794	dld-1	LLC1.3a	Concise description: LLC1.3 is orthologous to the human gene DIHYDROLIPOAMIDE DEHYDROGENASE (DLD; OMIM:246900), which when mutated leads to dihydrolipoamide dehydrogenase deficiency. Provisional description: LLC1.3 is orthologous to the human gene DIHYDROLIPOAMIDE DEHYDROGENASE (DLD; OMIM:246900), which when mutated leads to dihydrolipoamide dehydrogenase deficiency. Detailed description: none av…
177753	WBGene00004463	F49C12.8	Q20585	34	4.5799	10	7	0.18	23120	2.16263	IVVDATQLAAMK	LIATGQLQCR	9	6	0.156	23662	1.90178	IVVDATQLAAMK	LIATGQLQCR	2.0322	WBGene00004463	rpn-7	F49C12.8	Concise description: rpn-7 is predicted to encode a non-ATPase subunit of the 19S regulatory complex of the proteasome that affects fertility and embryonic viability. Provisional description: rpn-7 is predicted to encode a non-ATPase subunit of the 19S regulatory complex of the proteasome that affects fertility and embryonic viability. Detailed description: none available
180781	WBGene00006926	C42D8.2	G8JY38	62	4.5569	45	26	0.191	23120	9.73183	FDGLVLSGLPSASSELSQSR	QQPLQLDDYPVSFVESVK	54	30	0.222	23662	11.4107	IESSYDKEEQSEENTSFFTNEK	FDGLVLSGLPSASSELSQSR	10.5713	WBGene00006926	vit-2	C42D8.2a	Concise description: The vit-2 gene encodes the vitellogenin homolog YP170. Provisional description: The vit-2 gene encodes the vitellogenin homolog YP170. Detailed description: none available
178132	WBGene00014096	ZK829.7	ZK829.7	20	4.5093	2	2	0.048	23120	0.432526	QLSMSEVEGR	LAIMGVTR	2	2	0.073	23662	0.422619	NLVNLIAGGQIDAPDYR	QLSMSEVEGR	0.427573	WBGene00014096	ZK829.7	ZK829.7	Concise description: none available Provisional description: none available Detailed description: none available
176504	WBGene00010478	K01G5.5	K01G5.5	32	4.4916	11	3	0.058	23120	2.37889	SKLEGDDLAEAQQK	QMQELR	8	4	0.058	23662	1.69047	SKLEGDDLAEAQQK	QMQELR	2.03468	WBGene00010478	K01G5.5	K01G5.5	Concise description: The K01G5.5 gene encodes an ortholog of human DYSKERIN (DKC1; OMIM:300126), which when mutated leads to X-linked dyskeratosis congenita (OMIM:305000); the K01G5.5 protein is predicted to be mitochondrial with 68 percentage accuracy. Provisional description: Proteins localized to a given organelle by experiments tend to share a characteristic phylogenetic distribution of their…
180044	WBGene00004452	C06B8.8	O17570	58	4.4716	9	5	0.471	23120	1.94637	CASYLYTLVVADKDK	QSLPPGIQVK	10	5	0.471	23662	2.11309	CASYLYTLVVADKDK	QSLPPGIQVK	2.02973	WBGene00004452	rpl-38	C06B8.8	Concise description: rpl-38 encodes a large ribosomal subunit L38 protein. Provisional description: rpl-38 encodes a large ribosomal subunit L38 protein. Detailed description: none available
177895	WBGene00010556	K04D7.1	Q21215	61	4.443	55	17	0.572	23120	11.8945	TILVWDVDSVAPVDEGPIGR	FSPSNRDPVIVSAGWDK	45	15	0.495	23662	9.50892	FSPSNRDPVIVSAGWDK	TILVWDVDSVAPVDEGPIGR	10.7017	WBGene00010556	rack-1	K04D7.1	Concise description: rack-1 encodes a seven-WD repeat-containing protein that is the C. elegans ortholog of vertebrate Receptor for Activated C Kinase (Rack1); rack-1 is required cell autonomously for VD/DD motor axon pathfinding; rack-1 is also required for gonadal distal tip cell migration and for normal brood sizes; genetic analyses indicate that rack-1 functions in the same pathway with ced-1…
180485	WBGene00016995	D1005.1	acly-1	36	4.4347	14	8	0.091	23120	3.02768	DLISSLTSGLLTIGDR	ASGALVPESFDDLGNK	14	9	0.099	23662	2.95833	DLISSLTSGLLTIGDR	ASGALVPESFDDLGNK	2.99301	WBGene00016995	D1005.1	D1005.1	Concise description: none available Provisional description: none available Detailed description: none available
180692	WBGene00006921	F20B6.2	Q19626	68	4.4323	79	24	0.666	23120	17.0848	IYPEEMIQTGISAIDVMNSIAR	IPIFSASGLPHNEIAAQIVR	85	21	0.605	23662	17.9613	IYPEEMIQTGISAIDVMNSIAR	AVVGEEALSSDDLLYLEFLTK	17.5231	WBGene00006921	vha-12	F20B6.2	Concise description: vha-12 encodes an ortholog of subunit B of the cytoplasmic (V1) domain of vacuolar proton-translocating ATPase (V-ATPase); VHA-12 is orthologous to human ATP6V1B1 (OMIM:192132, mutated in distal renal tubular acidosis with progressive sensorineural deafness) and ATP6V1B2 (OMIM:606939); VHA-12 and TAG-300/Y110A7A.12 are co-orthologs; VHA-17, like VHA-1 and VHA-12, antagonizes …
178777	WBGene00020696	T22F3.3	T22F3.3	34	4.4223	13	9	0.141	23120	2.81142	LITAVAEQVNNDAIVGDR	GIAQVENVSNIK	12	8	0.123	23662	2.53571	LITAVAEQVNNDAIVGDR	FFNDGDYVQAVMDR	2.67356	WBGene00020696	T22F3.3	T22F3.3a	Concise description: T22F3.3 is orthologous to the human glycogen phosphorylase isozymes found in the muscle (PYGM), liver (PYGL) and brain (PYGB); T22F3.3 is down-regulated in efl-1/E2F transcription factor and dpl-1/DP (E2F-heterodimerization partner) mutants and has putative E2F consensus sites. Provisional description: T22F3.3 is orthologous to the human glycogen phosphorylase isozymes found …
174311	WBGene00004421	F10B5.1	Q09533	66	4.4122	78	20	0.65	23120	16.8685	ANVDTFPACVHMMSNER	EHLSSEALEAAR	75	19	0.65	23662	15.8482	VDIGDILFSMR	EHLSSEALEAAR	16.3584	WBGene00004421	rpl-10	F10B5.1	Concise description: rpl-10 encodes a large ribosomal subunit L10 protein required in mass RNAi assays for embryonic viability, fertility, normally rapid growth, and normal body coloration; the rpl-10 transcription unit has a nonsense transcript that is up-regulated in vivo by smg[-] mutations, indicating that rpl-10 is a natural substrate for SMG-mediated nonsense suppresssion; several other nat…
176283	WBGene00001385	F02A9.2	G1K0V6	53	4.3864	38	13	0.61	23120	8.21799	EVPENYDDIPAEYK	DKVNALNDEAK	41	14	0.687	23662	8.66368	DKVNALNDEAK	EVPENYDDIPAEYK	8.44083	WBGene00001385	far-1	F02A9.2a	Concise description: far-1 encodes a fatty acid/retinol binding protein; expressed throughout development with highest expression levels in L3 stage larvae and in adult males. Provisional description: far-1 encodes a fatty acid/retinol binding protein; expressed throughout development with highest expression levels in L3 stage larvae and in adult males. Detailed description: none available
3565862	WBGene00001037	T05C3.5	O16303	22	4.383	2	2	0.05	23120	0.432526	QGDVIKPGVIR	ILEVHVLPGMK	2	2	0.046	23662	0.422619	QGDVIKPGVIR	DGDDLHMTK	0.427573	WBGene00001037	dnj-19	T05C3.5	Concise description: This gene encodes a protein containing a DnaJ ('J') domain. Provisional description: Hsp70 chaperones assist many diverse protein-folding processes within cells, including folding of newly synthesized proteins in the cytosol, translocation of proteins into organelles, assembly and disassembly of protein complexes, control of the biological activity of folded regulatory protei…
175786	WBGene00004481	F54E7.2	P49196	63	4.3749	55	11	0.8	23120	11.8945	LVETLCAEHQIPLIK	VVGCSSAVVTNWGNEEQGR	57	12	0.8	23662	12.0446	LVETLCAEHQIPLIK	VVGCSSAVVTNWGNEEQGR	11.9695	WBGene00004481	rps-12	F54E7.2	Concise description: rps-12 encodes a small ribosomal subunit S12 protein; by homology, RPS-12 is predicted to function in protein biosynthesis; in C. elegans, RPS-12 activity is required for embryonic and germline development, normal movement, and the overall health of the animal. Provisional description: rps-12 encodes a small ribosomal subunit S12 protein; by homology, RPS-12 is predicted to f…
174695	WBGene00004454	C09H10.2	P48166	49	4.3599	26	8	0.4	23120	5.62284	QSGFGGQTKPIFR	HFELGGQK	33	9	0.4	23662	6.97321	QSGFGGQTKPIFR	HFELGGQK	6.29802	WBGene00004454	rpl-41	C09H10.2	Concise description: rpl-41 encodes a large ribosomal subunit L41 protein; by homology, RPL-41 is predicted to function in protein biosynthesis. Provisional description: rpl-41 encodes a large ribosomal subunit L41 protein; by homology, RPL-41 is predicted to function in protein biosynthesis. Detailed description: none available
176772	WBGene00012094	T27E9.2	T27E9.2	32	4.3344	3	2	0.24	23120	0.648789	CADHVTEFK	SILDECNDR	2	2	0.24	23662	0.422619	CADHVTEFK	SILDECNDR	0.535704	WBGene00012094	T27E9.2	T27E9.2	Concise description: none available Provisional description: none available Detailed description: none available
177236	WBGene00019543	K08F11.3	Q94261	37	4.3048	14	6	0.146	23120	3.02768	VMTALLGTYTEK	SFSFDHLER	16	10	0.249	23662	3.38095	LIGELECNLETLQDR	VMTALLGTYTEK	3.20431	WBGene00019543	cif-1	K08F11.3	Concise description: none available Provisional description: none available Detailed description: none available
176437	WBGene00000833	T20G5.2	P34575	59	4.2989	62	21	0.459	23120	13.4083	ASYWEYAYEDSMDLLAK	GGEEPLPEAIWWLLCTGDVPSEAQTAAITK	54	19	0.459	23662	11.4107	MLDNFPDNLHPMAQFIAAIAALNNESK	ASYWEYAYEDSMDLLAK	12.4095	WBGene00000833	cts-1	T20G5.2	Concise description: cts-1 encodes a citrate synthase; by homology, CTS-1 is predicted to function in the citric acid cycle to catalyze the formation of citrate from oxaloacetate and acetyl-CoA; cts-1 is required for embryonic development. Provisional description: This gene encodes a protein predicted by Eisenberg and coworkers, with 52 percentage accuracy, to be mitochondrial. Proteins localized…
173229	WBGene00013598	Y87G2A.10	Q9NA26	19	4.2819	2	2	0.124	23120	0.432526	VPIDAIVTTK	LSSMAASDEISDEDAR	1	1	0.048	23662	0.211309	VPIDAIVTTK	NA	0.321918	WBGene00013598	vps-28	Y87G2A.10a	Concise description: vps-28 encodes the C. elegans ortholog of S. cerevisiae vacuolar protein sorting protein Vps28p and human VPS28; VPS-28 is a component of the C. elegans ESCRT-1 (Endosomal Sorting Complex Required for Transport, other members include VPS-37, MVB-12, and TSG-101) that is required for cell surface receptor degradation via the multivesicular body sorting pathway and hence, downr…
176334	WBGene00001094	B0464.1	Q03577	46	4.2734	22	15	0.311	23120	4.75779	IISAPSEGGANVFEVSYFK	ASEQENQLAVVNLDTR	20	12	0.279	23662	4.22619	IISAPSEGGANVFEVSYFK	ASEQENQLAVVNLDTR	4.49199	WBGene00001094	dars-1	B0464.1	Concise description: drs-1 encodes a putative aspartyl(D) tRNA synthetase Provisional description: drs-1 encodes a putative aspartyl(D) tRNA synthetase Detailed description: none available
172071	WBGene00016655	C44E4.6	O01805	29	4.2674	7	3	0.465	23120	1.51384	QGTVGDNTTDKPGMFDLK	TLSFDDAAATVK	7	3	0.465	23662	1.47916	QGTVGDNTTDKPGMFDLK	TLSFDDAAATVK	1.4965	WBGene00016655	acbp-1	C44E4.6	Concise description: acbp-1 encodes a highly conserved protein containing a functional acyl-CoA-binding binding domain orthologous to human DBI (Diazepam Binding inhibitor) (OMIM: 125950) required for protein stability and ligand binding; acyl-CoA proteins are required for lipid droplet morphology and lipid storage function; acbp-1 mutants have reduced triglycerides, aberrant lipid droplet morpho…
172943	WBGene00004408	F25H2.10	Q93572	70	4.2668	80	25	0.692	23120	17.301	QVYDDGTLYTPEVLDMTTEELR	FAAAAPAAAAAPAAAAPAAK	81	22	0.615	23662	17.1161	FAAAAPAAAAAPAAAAPAAK	QVYDDGTLYTPEVLDMTTEELR	17.2085	WBGene00004408	rla-0	F25H2.10	Concise description: rpa-0 encodes an acidic ribosomal subunit protein P0. Provisional description: rpa-0 encodes an acidic ribosomal subunit protein P0. Detailed description: none available
177897	WBGene00001794	K04D7.3	N1NVC4	33	4.2518	10	5	0.153	23120	2.16263	KQDQECLADVEAK	AVQTMLCGTSANENAIK	10	7	0.217	23662	2.11309	KQDQECLADVEAK	TDFADGISHALTSIAPK	2.13786	WBGene00001794	gta-1	K04D7.3	Concise description: The gta-1 gene encodes an ortholog of the human gene GABAT, which when mutated leads to GABA-transaminase deficiency (OMIM:137150). Provisional description: The gta-1 gene encodes an ortholog of the human gene GABAT, which when mutated leads to GABA-transaminase deficiency (OMIM:137150). Detailed description: none available
178458	WBGene00004357	Y51H4A.3	Q22038	31	4.248	8	3	0.135	23120	1.7301	LVIVGDGACGK	ATQAALQQK	9	4	0.188	23662	1.90178	LVIVGDGACGK	ATQAALQQK	1.81594	WBGene00004357	rho-1	Y51H4A.3	Concise description: rho-1 encodes a Rho GTPase; rho-1 activity is required for regulation of a number of actin filament-based processes including embryonic polarity, cell migration, cell shape changes, muscle contraction, and neurite outgrowth; in addition, RHO-1 is required for both DGK-1- and UNC-13-dependent and independent regulation of synaptic signaling at neuromuscular junctions; as RHO-1…
176908	WBGene00001154	F56B3.5	O45106	26	4.2479	6	5	0.185	23120	1.29758	CDNVFCSGADLK	STTTNPANEVFIER	3	3	0.136	23662	0.633928	CDNVFCSGADLK	WALIPGAGGSQR	0.965754	WBGene00001154	ech-5	F56B3.5	Concise description: none available Provisional description: none available Detailed description: none available
180724	WBGene00003963	C07A12.4	G8JY07	62	4.2459	65	23	0.426	23120	14.0571	EGAGASEEEKAEEEADEEGHTEL	TGPVAKPLADADAVK	60	22	0.398	23662	12.6786	EGAGASEEEKAEEEADEEGHTEL	TGPVAKPLADADAVK	13.3679	WBGene00003963	pdi-2	C07A12.4a	Concise description: pdi-2 encodes a protein disulfide isomerase beta subunit; by homology, PDI-2 is predicted to function in oxidative protein folding in the endoplasmic reticulum (ER); PDI-2 activity is required for several organismal processes including body morphology, locomotion, fertility, molting, and collagen deposition; pdi-2 transcript levels are increased in response to ER stress; pdi-…
174482	WBGene00006433	F42A8.2	Q09545	47	4.2366	21	6	0.285	23120	4.54152	ASGAPATAAAAEASFPSTDDVAAK	FNPEAPGAKPTVQK	19	6	0.285	23662	4.01488	ASGAPATAAAAEASFPSTDDVAAK	FNPEAPGAKPTVQK	4.2782	WBGene00006433	sdhb-1	F42A8.2	Concise description: sdhb-1 encodes the C. elegans ortholog of human succinate dehydrogenase subunit B (SDHB; OMIM:185470, mutations lead to extraadrenal pheochromocytoma) which contains several iron-sulfur (Fe-S) clusters and functions to transfer electrons from the A (SDHA) subunit to the membrane-associated C (SDHC) subunit; RNAi screens indicate that sdhb-1 activity is essential for embryonic…
172238	WBGene00004505	F56H1.4	O76371	45	4.228	21	11	0.314	23120	4.54152	TMLELLNQLDGFQPNDDIK	AMEVDERPTEQYSDIGGCDK	21	9	0.237	23662	4.43749	AMEVDERPTEQYSDIGGCDK	IDVLDPALLR	4.48951	WBGene00004505	rpt-5	F56H1.4	Concise description: rpt-5 encodes a triple A ATPase subunit of the 26S proteasome's 19S regulatory particle (RP) base subcomplex; RPT-5 is required for embryonic, larval, and germline development and by homology, is predicted to function in unfolding protein substrates and translocating them into the core proteolytic particle (CP) of the proteasome. Provisional description: rpt-5 encodes a tripl…
177626	WBGene00006914	F35H10.4	G5EEK9	24	4.2212	3	3	0.036	23120	0.648789	DLNPNVNSFQR	IQDLQTVLGQTR	3	3	0.038	23662	0.633928	IQDLQTVLGQTR	DLNPNVNSFQR	0.641359	WBGene00006914	vha-5	F35H10.4	Concise description: vha-5 encodes an ortholog of subunit a of the membrane-bound (V0) domain of vacuolar proton-translocating ATPase (V-ATPase); VHA-5 is orthologous to human ATP6N1A (OMIM:192130), ATP6V0A2, ATP6V0A4 (OMIM:605239, mutated in distal renal tubular acidosis), and TCIRG1 (OMIM:604592, mutated in osteopetrosis); VHA-5 is expressed broadly in embryos (in dot- or cup-like perinuclear c…
180914	WBGene00003495	T22E5.5	Q27371	52	4.2049	17	7	0.168	23120	3.67647	GDQAAQFGNLAQAK	VQDVSGLLPNDLK	14	5	0.119	23662	2.95833	GDQAAQFGNLAQAK	VQDVSGLLPNDLK	3.3174	WBGene00003495	mup-2	T22E5.5	Concise description: mup-2 encodes the muscle contractile protein troponin T ( TnT ) homologous to vertebrate and invertebrate TnT and contains an invertebrate- specific COOH -terminal tail; mup-2 affects embryonic body wall muscle cell contraction, sarcomere organization, cell positioning, regulated muscle contraction in larval and adult body wall muscle, epidermal morphogenesis, and is required…
175398	WBGene00007000	Y71H2AM.23	G5ECM6	53	4.2045	32	13	0.308	23120	6.92042	KYEDIDNAPEEK	TVDQAEPGDQLGVLLR	34	10	0.234	23662	7.18452	KYEDIDNAPEEK	TVDQAEPGDQLGVLLR	7.05247	WBGene00007000	tufm-1	Y71H2AM.23	Concise description: none available Provisional description: none available Detailed description: none available
173384	WBGene00004504	F23F1.8	O17071	45	4.2014	27	14	0.415	23120	5.8391	TLMELLNQLDGFDSLGK	MSHEDPGNISYSDVGGLAEQIR	23	13	0.394	23662	4.86011	TLMELLNQLDGFDSLGK	MSHEDPGNISYSDVGGLAEQIR	5.34961	WBGene00004504	rpt-4	F23F1.8a	Concise description: rpt-4 encodes a predicted ATPase subunit of the 19S regulatory complex of the proteasome that affects body morphology, embryonic viability, growth, movement, and fertility; interacts with itself in yeast two-hybrid assays. Provisional description: rpt-4 encodes a predicted ATPase subunit of the 19S regulatory complex of the proteasome that affects body morphology, embryonic v…
175659	WBGene00004679	F26F4.10	Q65ZK0	36	4.1835	11	7	0.123	23120	2.37889	ELQQGYSDYSAASDQAALLNR	ATSTSSPSSSTSAPAEK	15	8	0.145	23662	3.16964	ATSTSSPSSSTSAPAEK	ETAMSEEQLVAAR	2.77427	WBGene00004679	rars-1	F26F4.10a	Concise description: rrt-1 encodes an arginyl-tRNA synthetase that affects embryonic viability and fertility Provisional description: rrt-1 encodes an arginyl-tRNA synthetase that affects embryonic viability and fertility Detailed description: none available
172074	WBGene00004415	B0041.4	O02056	70	4.1741	80	21	0.612	23120	17.301	KLDTIYGTTVANSSQLK	GHVIDQVAEVPLVVSDK	74	21	0.629	23662	15.6369	KLDTIYGTTVANSSQLK	GHVIDQVAEVPLVVSDK	16.4689	WBGene00004415	rpl-4	B0041.4	Concise description: rpl-4 encodes a large ribosomal subunit L4 protein. Provisional description: rpl-4 encodes a large ribosomal subunit L4 protein. Detailed description: none available
174012	WBGene00020022	R12C12.1	R12C12.1	21	4.1598	1	1	0.018	23120	0.216263	SYIGMGYYDTIVPAVISR	NA	3	3	0.058	23662	0.633928	SYIGMGYYDTIVPAVISR	ATSNICTAQALLANMSAMYAVYHGPQR	0.425096	WBGene00020022	R12C12.1	R12C12.1a	Concise description: R12C12.1 is orthologous to human GLYCINE DECARBOXYLASE (GLDC; OMIM:238300), which when mutated leads to glycine encephalopathy. Provisional description: R12C12.1 is orthologous to human GLYCINE DECARBOXYLASE (GLDC; OMIM:238300), which when mutated leads to glycine encephalopathy. Detailed description: none available
179041	WBGene00018491	F46E10.10	Q8IA50	47	4.1593	33	10	0.354	23120	7.13668	NVIIWGNHSGTQFPDVTHATVNK	VIVVGNPANTNAFIAAK	36	10	0.354	23662	7.60713	NVIIWGNHSGTQFPDVTHATVNK	VIVVGNPANTNAFIAAK	7.3719	WBGene00018491	mdh-1	F46E10.10a	Concise description: mdh-1 encodes a malate dehydrogenase; by homology, MDH-1 is predicted to function to reversibly catalyze the formation of oxaloacetate from malate. Provisional description: mdh-1 encodes a malate dehydrogenase; by homology, MDH-1 is predicted to function to reversibly catalyze the formation of oxaloacetate from malate. Detailed description: none available
176121	WBGene00000041	F54H12.1	P34455	49	4.1539	33	15	0.273	23120	7.13668	CTTDHISAAGPWLK	LDFNPLTDELTAADGSK	36	16	0.26	23662	7.60713	CTTDHISAAGPWLK	LDFNPLTDELTAADGSK	7.3719	WBGene00000041	aco-2	F54H12.1a	Concise description: aco-2 encodes an aconitase homolog that is required for embryonic viability, fertility, locomotion, and vulval morphogenesis, and perhaps for normal lifespan. Provisional description: Mitochondrial aconitase, an enzyme in the citric acid cycle, has been described as a specific target during aging of the housefly, and might be such a target in C. elegans as well; direct observ…
177583	WBGene00004471	C49H3.11	P51403	63	4.1491	57	18	0.544	23120	12.327	EFEIIDALCSNLKDEVLK	ITTLEEIYLNSLPIK	61	16	0.544	23662	12.8899	EFEIIDALCSNLKDEVLK	LLHMAGIEDCYTAAK	12.6084	WBGene00004471	rps-2	C49H3.11	Concise description: rps-2 encodes a small ribosomal subunit S2 protein. Provisional description: rps-2 encodes a small ribosomal subunit S2 protein. Detailed description: none available
177017	WBGene00006920	Y38F2AL.3	Q9XXU9	30	4.1378	7	4	0.115	23120	1.51384	VGTLDQLVGLSDDLSK	QISQIDNDLK	7	5	0.151	23662	1.47916	VGTLDQLVGLSDDLSK	YATLSSMVVPGSSK	1.4965	WBGene00006920	vha-11	Y38F2AL.3a	Concise description: vha-11 encodes, by alternative splicing, two isoforms of an ortholog of subunit C of the cytoplasmic (V1) domain of vacuolar proton-translocating ATPase (V-ATPase); VHA-11 is a predicted cytosolic stator (stalk) component; VHA-11 is found in dot-like structures around embryonic nuclei, with diffuse distribution in embryonic cytoplasm; in later embryos (comma stage onward), VH…
176006	WBGene00004483	F37C12.9	P48150	72	4.1238	35	12	0.579	23120	7.5692	AKEEQAVVSLGPQAK	DESSPYAAMLAAQDVADR	30	10	0.579	23662	6.33928	AKEEQAVVSLGPQAK	DESSPYAAMLAAQDVADR	6.95424	WBGene00004483	rps-14	F37C12.9	Concise description: rps-14 encodes a small ribosomal subunit S14 protein; by homology, RPS-14 is predicted to function in protein biosynthesis; in C. elegans, RPS-14 activity is required for embryonic and germline development, as well as the overall health of the animal; RPS-14 co-immuoprecipitates with ALG-1, a C. elegans Argonaut ortholog. Provisional description: rps-14 encodes a small riboso…
176015	WBGene00004417	R151.3	P47991	57	4.0951	46	15	0.521	23120	9.9481	QLPQSGLLLVTGPHK	QLPQSGLLLVTGPHK	45	13	0.521	23662	9.50892	QLPQSGLLLVTGPHK	TLTPGTVLIVLAGR	9.72851	WBGene00004417	rpl-6	R151.3	Concise description: rpl-6 encodes a large ribosomal subunit L6 protein. Provisional description: rpl-6 encodes a large ribosomal subunit L6 protein. Detailed description: none available
177168	WBGene00016435	C35B1.5	C35B1.5	29	4.0883	6	3	0.225	23120	1.29758	LINNAGELLHDAR	ADLFAGKPLINQEGK	6	3	0.232	23662	1.26786	MADLFAGKPLINQEGK	LINNAGELLHDAR	1.28272	WBGene00016435	C35B1.5	C35B1.5	Concise description: none available Provisional description: none available Detailed description: none available
178997	WBGene00000802	Y38A10A.5	P27798	48	4.0864	28	10	0.372	23120	6.05536	SGTIFDNIIITDSVEEAEAHAAETFDK	HEQGIDCGGGYVK	27	11	0.372	23662	5.70535	SGTIFDNIIITDSVEEAEAHAAETFDK	HEQGIDCGGGYVK	5.88035	WBGene00000802	crt-1	Y38A10A.5	Concise description: crt-1 encodes an ortholog of calreticulin (a calcium-binding molecular chaperone of the endoplasmic reticulum); crt-1 is dispensable for viability, but required for normal sperm development, male mating efficiency, some forms of necrotic cell death, and hermaphrodite fertility at high temperatures (which may reflect a stress response); crt-1 expression is induced by stress; C…
174279	WBGene00014054	ZK669.4	ZK669.4	43	4.059	21	9	0.212	23120	4.54152	AASLALLEYPSLNSTTDEK	SYEPLKEDVAVPIR	18	7	0.167	23662	3.80357	SYEPLKEDVAVPIR	SIFEIAQELNR	4.17255	WBGene00014054	ZK669.4	ZK669.4	Concise description: ZK669.4 is orthologous to the human gene DIHYDROLIPOAMIDE BRANCHED CHAIN TRANSACYLASE (E2 COMPONENT OF BRANCHED CHAIN KETO ACID DEHYDROGENASE COMPLEX; (DBT), which when mutated leads to maple syrup urine disease, type II (OMIM:248610); the ZK669.4 protein is predicted to be mitochondrial with 68 percentage accuracy. Provisional description: Proteins localized to a given organ…
176842	WBGene00019819	R02D3.1	R02D3.1	28	4.0565	3	2	0.022	23120	0.648789	SGVNVLIQPSNR	AGIQRPILK	7	4	0.062	23662	1.47916	SGVNVLIQPSNR	DMVTSSYVSPELEALDK	1.06397	WBGene00019819	R02D3.1	R02D3.1	Concise description: The R02D3.1 gene encodes an ortholog of the human gene ALPHA-AMINOADIPATE SEMIALDEHYDE SYNTHASE (AASS; OMIM:605113), which when mutated leads to hyperlysinemia (OMIM:238700). Provisional description: The R02D3.1 gene encodes an ortholog of the human gene ALPHA-AMINOADIPATE SEMIALDEHYDE SYNTHASE (AASS; OMIM:605113), which when mutated leads to hyperlysinemia (OMIM:238700). Det…
178452	WBGene00001604	Y105C5B.28	Q2HQL4	27	4.0479	5	3	0.152	23120	1.08131	NPGGIDEIMSAINK	TVCLEGAER	4	3	0.152	23662	0.845237	NPGGIDEIMSAINK	TVCLEGAER	0.963274	WBGene00001604	gln-3	Y105C5B.28a	Concise description: none available Provisional description: none available Detailed description: none available
172775	WBGene00004807	F46A9.5	G5ECU1	34	4.047	6	3	0.222	23120	1.29758	ISSSDNEIFLVPR	NDFTPEEEEQIRK	9	3	0.222	23662	1.90178	TDDIGSWDVEFLK	ISSSDNEIFLVPR	1.59968	WBGene00004807	skr-1	F46A9.5	Concise description: The skr-1 gene encodes a homolog of Skp1 in S. cerevisiae that is required for the restraint of cell proliferation, progression through the pachytene stage of meiosis, and the formation of bivalent chromosomes at diakinesis. Provisional description: The skr-1 gene encodes a homolog of Skp1 in S. cerevisiae that is required for the restraint of cell proliferation, progression …
171965	WBGene00020185	T03F1.3	P91427	32	4.0461	5	4	0.098	23120	1.08131	IGNSLYDEEGAK	LAIDQLNLAGK	9	6	0.17	23662	1.90178	IGNSLYDEEGAK	IVNELLEAAK	1.49154	WBGene00020185	pgk-1	T03F1.3	Concise description: pgk-1 encodes a protein that is orthologous to human PHOSPHOGLYCERETE KINASE 1 (PGK1; OMIM:311800), which when mutated leads to hemolytic anemia and neurologic disturbances. Provisional description: pgk-1 encodes a protein that is orthologous to human PHOSPHOGLYCERETE KINASE 1 (PGK1; OMIM:311800), which when mutated leads to hemolytic anemia and neurologic disturbances. Detai…
175628	WBGene00004469	B0393.1	P46769	68	4.0381	71	15	0.71	23120	15.3547	SGGAAHSALTEEDVMK	IDHQAVTEASYVGVPVISFVNTESPLK	65	15	0.681	23662	13.7351	MSGGAAHSALTEEDVMK	IDHQAVTEASYVGVPVISFVNTESPLK	14.5449	WBGene00004469	rps-0	B0393.1	Concise description: rps-0 encodes a small ribosomal subunit SA protein that appears to function as both a ribosomal component and a laminin receptor; by homology, RPS-0 is predicted to play roles in protein biosynthesis and cell adhesion; in C. elegans, RPS-0 activity is required for embryonic and germline development, vulval morphogenesis, and the overall health of the animal. Provisional descr…
173237	WBGene00012354	W09C5.8	W09C5.8	30	4.022	6	3	0.206	23120	1.29758	ELVGYGANGDNIYQDR	LDYWYPAIR	6	3	0.206	23662	1.26786	ELVGYGANGDNIYQDR	LDYWYPAIR	1.28272	WBGene00012354	W09C5.8	W09C5.8	Concise description: W09C5.8 encodes the C. elegans ortholog of the cytochrome c oxidase (COX) subunit IV (COX IV); loss of W09C5.8 activity via RNAi results in a shortened life span, reduced fertility, and defects in mitochondrial respiratory chain function. Provisional description: W09C5.8 encodes the C. elegans ortholog of the cytochrome c oxidase (COX) subunit IV (COX IV); loss of W09C5.8 act…
180950	WBGene00000991	M03A8.1	Q21481	36	3.9987	10	6	0.177	23120	2.16263	SALIGLSNSLAQEGAK	SAGGQAVANYDSVEFGDK	13	9	0.264	23662	2.74702	SALIGLSNSLAQEGAK	SAGGQAVANYDSVEFGDK	2.45483	WBGene00000991	dhs-28	M03A8.1	Concise description: dhs-28 encodes an ortholog of human 17-BETA-HYDROXYSTEROID DEHYDROGENASE 4 (HSD17B4; OMIM:601860, mutated in D-bifunctional protein deficiency), which contains a C-terminal SCP-2 sterol transfer domain; the deletion allele dhs-28(ok450) is superficially wild-type. Provisional description: dhs-28 encodes an ortholog of human 17-BETA-HYDROXYSTEROID DEHYDROGENASE 4 (HSD17B4; OMI…
180534	WBGene00020507	T14F9.1	Q22494	50	3.9883	37	17	0.409	23120	8.00173	SQMIQEDDYNFITSFENAK	QLDSDVQTDTVAVK	29	15	0.391	23662	6.12797	MAEVPHHNIPAVDMLNATSR	QLDSDVQTDTVAVK	7.06485	WBGene00020507	vha-15	T14F9.1	Concise description: vha-15 encodes an ortholog of subunit H of the cytoplasmic (V1) domain of vacuolar proton-translocating ATPase (V-ATPase); VHA-15 and VHA-18 are co-orthologs; VHA-15, along with VHA-2 and probably all V-ATPase subunits, is required for systemic RNAi, probably during endocytotic RNAi uptake; VHA-15 is a predicted cytosolic stator (stalk) component; neurons). Provisional descri…
172408	WBGene00019322	K02F2.2	P27604	68	3.9787	70	21	0.506	23120	15.1384	VIVTEIDPINALQAAMEGYEVTTLEEAAPK	TLDEEVAYLHLAQLGVK	62	21	0.556	23662	13.1012	VIVTEIDPINALQAAMEGYEVTTLEEAAPK	TLDEEVAYLHLAQLGVK	14.1198	WBGene00019322	ahcy-1	K02F2.2	Concise description: ahcy-1 encodes the C. elegans S-adenosylhomocysteine hydrolase (SAHH) ortholog; by homology, AHCY-1 is predicted to catalyze the hydrolysis of S-adenosyl-L-homocysteine to adenosine and L-homocysteine; loss of ahcy-1 activity via RNAi results in embryonic and larval lethality, abnormal body morphology, sick animals, and uncoordinated locomotion; Northern blot analyses indicat…
171901	WBGene00020915	W01B11.3	O45012	50	3.9643	30	14	0.388	23120	6.48789	IDALSDESATNEIGIECR	MTALAPNLTVLLGELVGAR	26	12	0.343	23662	5.49404	MTALAPNLTVLLGELVGAR	LSLNCVHDSSINELMR	5.99097	WBGene00020915	nol-5	W01B11.3	Concise description: none available Provisional description: none available Detailed description: none available
172744	WBGene00009126	F25H5.3	B7WNA0	47	3.9588	22	11	0.12	23120	4.75779	QGAGATNTLR	AADWPTDVDNR	30	12	0.12	23662	6.33928	INHAIAIGK	EAEAAVYHR	5.54854	WBGene00009126	pyk-1	F25H5.3a	Concise description: pyk-1 encodes one of two C. elegans pyruvate kinases; large-scale RNAi experiments indicate that pyk-1 is essential for embryonic development and specifically, for normal cortical activity in the AB blastomere; large-scale expression studies show that pyk-1 is expressed in body wall muscle in larvae and in body wall and vulval muscle, as well as in the reproductive system, in…
178020	WBGene00008505	F01G4.6	F01G4.6	63	3.9544	56	15	0.459	23120	12.1107	VALNLPRPPPPEMPASLK	NVYADMLGEENAYLYR	56	14	0.459	23662	11.8333	VALNLPRPPPPEMPASLK	NVYADMLGEENAYLYR	11.972	WBGene00008505	F01G4.6	F01G4.6a	Concise description: none available Provisional description: none available Detailed description: none available
177540	WBGene00004046	F45E4.2	Q94230	37	3.9292	10	6	0.327	23120	2.16263	FGEGHEQENTNTPK	QQIAIPSDGIAEIHK	11	6	0.327	23662	2.3244	QQIAIPSDGIAEIHK	MLALIDEPSTGEHAPK	2.24351	WBGene00004046	plp-1	F45E4.2	Concise description: plp-1 encodes a protein containing three PUR repeats that has similarity to the mammalian transcription factor pur alpha; plp-1 is required for embryonic development, development of the pharynx, and formation of the intestine; PLP-1 interacts with double-stranded DNA and specifically, with a Lef-1 binding site within the end-1 promoter; PLP-1 DNA binding is regulated by phosp…
177481	WBGene00004473	Y43B11AR.4	Q9N3X2	67	3.9276	61	21	0.714	23120	13.192	FPTGFMDVVAIER	LAAPSHWMLDK	64	20	0.722	23662	13.5238	FPTGFMDVVAIER	LAAPSHWMLDK	13.3579	WBGene00004473	rps-4	Y43B11AR.4	Concise description: rps-4 encodes a small ribosomal subunit S4 protein. Provisional description: rps-4 encodes a small ribosomal subunit S4 protein. Detailed description: none available
175936	WBGene00003162	F20H11.3	O02640	60	3.9201	49	16	0.545	23120	10.5969	VALLGAAGGIGQPLGLLLK	ALIAIITNPVNSTVPIASEVLK	47	18	0.625	23662	9.93154	VALLGAAGGIGQPLGLLLK	AGAGSATLSMALAGAR	10.2642	WBGene00003162	mdh-2	F20H11.3	Concise description: mdh-2 encodes a homolog of malate dehydrogenase that is predicted to be mitochondrial. Provisional description: This gene encodes a protein predicted by Eisenberg and coworkers, with 52 percentage accuracy, to be mitochondrial. Detailed description: none available
179150	WBGene00020246	T05B11.3	P90961	40	3.895	16	6	0.23	23120	3.46021	GPSPILSTVPR	QQDGDAQWETVNK	12	6	0.252	23662	2.53571	QQDGDAQWETVNK	GPSPILSTVPR	2.99796	WBGene00020246	clic-1	T05B11.3	Concise description: none available Provisional description: none available Detailed description: none available
175827	WBGene00017166	F01F1.12	G8JY45	61	3.8776	49	14	0.467	23120	10.5969	YAGEDAAGAAAESLFVAK	YASICQANGLVPIVEPEVLCDGEHDLAR	52	15	0.514	23662	10.9881	YASICQANGLVPIVEPEVLCDGEHDLAR	YAGEDAAGAAAESLFVAK	10.7925	WBGene00017166	aldo-2	F01F1.12a	Concise description: aldo-2 encodes a fructose-bisphosphate aldolase homologous to human ALDOB, which when mutated leads to fructosemia, hereditary fructose intolerance (OMIM:229600). Provisional description: aldo-2 encodes a fructose-bisphosphate aldolase homologous to human ALDOB, which when mutated leads to fructosemia, hereditary fructose intolerance (OMIM:229600). Detailed description: none …
175501	WBGene00004414	F13B10.2	G5ECE5	64	3.8758	57	23	0.414	23120	12.327	ALTTIWAEHLSEEAR	VACIGAWHPSR	54	20	0.387	23662	11.4107	ALTTIWAEHLSEEAR	NNGSTEFDLTQK	11.8689	WBGene00004414	rpl-3	F13B10.2a	Concise description: rpl-3 encodes a large ribosomal subunit L3 protein required in mass RNAi assays for embryonic and larval viability, fertility, and general health; the rpl-3 transcription unit has a nonsense transcript that is up-regulated in vivo by smg[-] mutations, indicating that rpl-3 is a natural substrate for SMG-mediated nonsense suppresssion; several other natural mRNA substrates of …
172127	WBGene00003934	F54C1.7	G5EF37	45	3.8705	9	4	0.205	23120	1.94637	AEDIEEILAEIDGSQIEEYQK	AEDIEEILAEIDGSQIEEYQK	8	4	0.211	23662	1.69047	MAEDIEEILAEIDGSQIEEYQK	AEDIEEILAEIDGSQIEEYQK	1.81842	WBGene00003934	pat-10	F54C1.7	Concise description: pat-10 encodes body wall muscle troponin C, the calcium-binding component of the troponin complex of actin thin filaments; PAT-10 is essential for muscle contraction and thus for completion of embryonic morphogenesis and elongation; by homology, PAT-10 likely functions to regulate body wall muscle contraction in response to changes in intracellular calcium; PAT-10 is expresse…
171800	WBGene00017734	F23C8.5	F23C8.5	36	3.8679	7	3	0.137	23120	1.51384	QAGGFVDDVSALVAK	EIDGGLDTIK	9	4	0.176	23662	1.90178	QAGGFVDDVSALVAK	VEDAGAGHMK	1.70781	WBGene00017734	F23C8.5	F23C8.5	Concise description: The F23C8.5 gene encodes an ortholog of the human gene ELECTRON TRANSFER FLAVOPROTEIN BETA SUBUNIT (ETFB), which when mutated leads to glutaricaciduria type IIB (OMIM:130410). Provisional description: The F23C8.5 gene encodes an ortholog of the human gene ELECTRON TRANSFER FLAVOPROTEIN BETA SUBUNIT (ETFB), which when mutated leads to glutaricaciduria type IIB (OMIM:130410). D…
180956	WBGene00000210	C53B7.4	Q18803	35	3.862	9	4	0.321	23120	1.94637	YIFGYLVPADYVSK	VQSFIQTGGYK	8	3	0.214	23662	1.69047	VQSFIQTGGYK	IANLTGALYR	1.81842	WBGene00000210	asg-2	C53B7.4	Concise description: asg-2 encodes a homolog of subunit G of the membrane-bound F0 proton channel portion of ATP synthase (mitochondrial respiratory chain [MRC] complex V); asg-2 activity is required for growth at a normally high rate and for normal osmoregulation; in addition, asg-2 activity is required for response to hermaphrodite contact, the first step in a series of stereotypical male matin…
174385	WBGene00004259	D2085.1	Q18990	39	3.8587	5	5	0.025	23120	1.08131	DVEEPSSLLVPAR	SVGEVMGIGR	4	4	0.019	23662	0.845237	KADVPCLSGIDVR	SVGEVMGIGR	0.963274	WBGene00004259	pyr-1	D2085.1	Concise description: pyr-1 encodes the C. elegans protein CAD which is orthologous to the human gene CARBAMYL PHOSPHATE SYNTHETASE I (CPS1, which when mutated leads to hyperammonemia (OMIM:237300); pyr-1 encodes a single protein with predicted carbamoyl phosphate synthetase, aspartate transcarbamoylase, and dihydroorotase activities (CAD), which is involved in pyrimidine biosynthesis; pyr-1 mutan…
175393	WBGene00022182	Y71H2AM.17	Q9BL39	7	3.8587	4	3	0.172	23120	0.865052	AENPEAQLWDIGK	EKPAESTETPAAGTEPSTDDGAIETTTTTTTTENK								0.432526	WBGene00022182	swsn-3	Y71H2AM.17	Concise description: none available Provisional description: none available Detailed description: none available
172904	WBGene00001337	ZC434.5	Q23315	46	3.8538	27	13	0.167	23120	5.8391	GAPVSAAASSGGSDALQLYNSIEQQGGIVR	DATGSDYKPAPAQLAASAAAAPAPAPAFDEAALLK	26	10	0.127	23662	5.49404	DATGSDYKPAPAQLAASAAAAPAPAPAFDEAALLK	SAAAPTATASTGK	5.66657	WBGene00001337	ears-1	ZC434.5	Concise description: ers-2 encodes a predicted mitochondrial glutamyl-tRNA synthetase (GluRS), a class I aminoacyl-tRNA synthetase that catalyzes the attachment of glutamate to its cognate tRNA and is thus required for protein biosynthesis; ERS-2 contains, at its C-terminus, six tandemly repeated WHEP-TRS domains that have been predicted to function as general RNA-binding domains that may act as …
174090	WBGene00002045	C56C10.8	Q18885	50	3.846	17	5	0.398	23120	3.67647	VQTSVPANTFSVTGSADNK	LGPDGKGEDEDVPELVGDFDAASK	14	6	0.441	23662	2.95833	LGPDGKGEDEDVPELVGDFDAASK	VQTSVPANTFSVTGSADNK	3.3174	WBGene00002045	icd-1	C56C10.8	Concise description: icd-1 encodes the C. elegans ortholog of the beta-subunit of the nascent polypeptide-associated complex (betaNAC); during development, icd-1 activity is required for prevention of ced-4-dependent, but ced-3-independent, programmed cell death and for normal embryonic development; ICD-1 is widely expressed throughout development and colocalizes primarily with mitochondria. Prov…
177203	WBGene00004419	Y24D9A.4	Q966C6	64	3.8407	56	14	0.43	23120	12.1107	KYNVPYAIIK	LVETVNNNFSER	53	16	0.43	23662	11.1994	LVETVNNNFSER	NFNIGQDIQPK	11.655	WBGene00004419	rpl-7A	Y24D9A.4a	Concise description: rpl-7A encodes a large ribosomal subunit L7a protein required in mass RNAi assays for fertility, vulval development, and general health; the rpl-7A transcription unit has one nonsense transcript that is up-regulated in vivo by smg[-] mutations, indicating that rpl-7A is a natural substrate for SMG-mediated nonsense suppresssion; several other natural mRNA substrates of SMG su…
173086	WBGene00002000	F58D5.1	Q9NLD1	24	3.8123	4	2	0.036	23120	0.865052	QQGAAAVTSGK	EEAPETTTEAK	1	1	0.011	23662	0.211309	EYASLDR	NA	0.53818	WBGene00002000	hrp-2	F58D5.1a	Concise description: none available Provisional description: none available Detailed description: none available
174309	WBGene00008053	C41C4.8	P54812	44	3.8101	23	12	0.204	23120	4.97405	EAVVETPNTTWSDIGGLQNVK	VINQVLTEMDGMNAK	20	11	0.196	23662	4.22619	EAVVETPNTTWSDIGGLQNVK	VINQVLTEMDGMNAK	4.60012	WBGene00008053	cdc-48.2	C41C4.8	Concise description: cdc-48.2 encodes a AAA (ATPase associated with various cellular activities) ATPase that is one of two C. elegans p97/VCP/CDC48 homologs; cdc-48.2 acts redundantly with cdc-48.1 in endoplasmic reticulum-associated protein degradation (ERAD); in addition, cdc-48.1 and cdc-48.2 together provide an essential function during embryonic development; CDC-48.2 exhibits ATPase activity…
176120	WBGene00018846	F54H12.6	P34460	49	3.7769	25	9	0.427	23120	5.40657	SSVILDVKPWDDETDLGEMEK	SIEMDGLVWGGAK	24	8	0.394	23662	5.07142	SSVILDVKPWDDETDLGEMEK	KLQIITVIEDLK	5.239	WBGene00018846	eef-1B.1	F54H12.6	Concise description: none available Provisional description: none available Detailed description: none available
179106	WBGene00017317	F09G2.9	O17406	14	3.7679								8	4	0.137	23662	1.69047	KEDAPEPVVTEEK	KEPAAVVEEK	0.845235	WBGene00017317	attf-2	F09G2.9	Concise description: none available Provisional description: none available Detailed description: none available
175070	WBGene00004456	Y48B6A.2	Q9U2A8	51	3.7494	23	6	0.571	23120	4.97405	KATGIWNCAK	KLEVAQHSR	21	5	0.374	23662	4.43749	KATGIWNCAK	KLEVAQHSR	4.70577	WBGene00004456	rpl-43	Y48B6A.2	Concise description: rpl-43 encodes a large ribosomal subunit L37a protein. Provisional description: rpl-43 encodes a large ribosomal subunit L37a protein. Detailed description: none available
174159	WBGene00002238	T02G5.9	Q95ZQ3	36	3.7448	14	9	0.166	23120	3.02768	VAPELYHK	YLDLILNPR	6	4	0.074	23662	1.26786	LNVAVADAPK	VAPELYHK	2.14777	WBGene00002238	kars-1	T02G5.9a	Concise description: none available Provisional description: none available Detailed description: none available
176975	WBGene00004497	Y41D4B.5	Q95Y04	63	3.7342	12	3	0.508	23120	2.59516	EGDILTLLESER	VEFINDQNNR	12	3	0.508	23662	2.53571	EGDILTLLESER	TGSQGQCTQVR	2.56543	WBGene00004497	rps-28	Y41D4B.5	Concise description: rps-28 encodes a small ribosomal subunit S28 protein. Provisional description: rps-28 encodes a small ribosomal subunit S28 protein. Detailed description: none available
266858	WBGene00006434	F09E5.15	Q8IG31	69	3.7214	59	14	0.759	23120	12.7595	AINTVVLAASTDSVFSHLAWINQPR	HGEVCPAGWTPGSDTIKPGVK	60	16	0.759	23662	12.6786	AINTVVLAASTDSVFSHLAWINQPR	HGEVCPAGWTPGSDTIKPGVK	12.719	WBGene00006434	prdx-2	F09E5.15a	Concise description: prdx-2 encodes one of two C. elegans typical 2-Cys peroxiredoxins, peroxidase enzymes that reduce hydrogen peroxide and contribute to the oxidative-stress response of multicellular organisms; loss of prdx-2 activity results in increased sensitivity to sublethal doses of hydrogen peroxide and increased resistance to heavy metals, likely via increased expression of Phase II det…
178014	WBGene00011480	T05E11.3	Q22235	45	3.704	23	10	0.149	23120	4.97405	QDLINNLGTIAR	ELISNASDALDK	19	10	0.146	23662	4.01488	QDLINNLGTIAR	ELISNASDALDK	4.49446	WBGene00011480	enpl-1	T05E11.3a	Concise description: T05E11.3 encodes the C. elegans ortholog of the Hsp90 family member and endoplasmic reticulum (ER) chaperone GRP94/GP96; loss of T05E11.3 activity via RNAi results in slow growth, larval arrest, uncoordinated locomotion, and weak endocytosis defects; in addition, loss of T05E11.3 expression results in an increase in hsp-4 expression, revealing compensatory regulation amongst …
171750	WBGene00004441	C53H9.1	P91914	58	3.6997	34	11	0.632	23120	7.35294	VVSYTHLLPTR	TYPHAIIAGIDR	44	12	0.596	23662	9.29761	VVSYTHLLPTR	TYPHAIIAGIDR	8.32527	WBGene00004441	rpl-27	C53H9.1	Concise description: rpl-27 encodes a large ribosomal subunit L27 protein. Provisional description: rpl-27 encodes a large ribosomal subunit L27 protein. Detailed description: none available
178012	WBGene00004474	T05E11.1	P49041	61	3.6806	44	14	0.59	23120	9.51557	TIAECLADELINAAK	SVNVSDISLVDYIPVK	47	16	0.614	23662	9.93154	TIAECLADELINAAK	WSLQSVNVSDISLVDYIPVK	9.72355	WBGene00004474	rps-5	T05E11.1	Concise description: rps-5 encodes a small ribosomal subunit S5 protein. Provisional description: rps-5 encodes a small ribosomal subunit S5 protein. Detailed description: none available
172310	WBGene00020347	T08B2.7	Q9GYT0	45	3.6705	19	13	0.262	23120	4.109	VIGMHYFSPVEK	LTAGNYPAPLK	23	11	0.215	23662	4.86011	FGFPVGAATLADEVGLDVAEHVAQFLGK	FAGAYEAVQFEPCQLLK	4.48456	WBGene00020347	T08B2.7	T08B2.7a	Concise description: T08B2.7 is orthologous to the human gene HYDROXYACYL-COENZYME A DEHYDROGENASE/3-KETOACYL-COENZYME A THIOLASE/ENOYL-COENZYME A HYDRATASE (TRIFUNCTIONAL PROTEIN), ALPHA SUBUNIT (HADHA; OMIM:600890), which when mutated leads to disease Provisional description: T08B2.7 is orthologous to the human gene HYDROXYACYL-COENZYME A DEHYDROGENASE/3-KETOACYL-COENZYME A THIOLASE/ENOYL-COENZ…
180231	WBGene00006945	Y80D3A.1	G5EDY2	29	3.6606	5	2	0.055	23120	1.08131	YAFSGGQQTVQEHR	KLDEEIIAR	4	3	0.094	23662	0.845237	YAFSGGQQTVQEHR	LVTDETVEEFVK	0.963274	WBGene00006945	wars-1	Y80D3A.1	Concise description: wrs-1 encodes a predicted tryptophanyl-tRNA synthetase that affects fertility, embryonic viability, growth, and locomotion Provisional description: wrs-1 encodes a predicted tryptophanyl-tRNA synthetase that affects fertility, embryonic viability, growth, and locomotion Detailed description: none available
177503	WBGene00004477	F42C5.8	V6CM07	70	3.6537	61	15	0.606	23120	13.192	TAAVDALLIEQFNTGR	ISSSPGQVGQANGYILEGK	57	14	0.601	23662	12.0446	TAAVDALLIEQFNTGR	ISSSPGQVGQANGYILEGK	12.6183	WBGene00004477	rps-8	F42C5.8	Concise description: rps-8 encodes a small ribosomal subunit S8 protein; by homology, RPS-8 is predicted to function in protein biosynthesis; in C. elegans, RPS-8 activity is required for germline development and the overall health of the animal. Provisional description: rps-8 encodes a small ribosomal subunit S8 protein; by homology, RPS-8 is predicted to function in protein biosynthesis; in C. …
171602	WBGene00004418	F53G12.10	O01802	67	3.6521	56	15	0.512	23120	12.1107	VPITDNTIVEQSLGK	VDGNRVPITDNTIVEQSLGK	52	16	0.598	23662	10.9881	VPITDNTIVEQSLGK	VDGNRVPITDNTIVEQSLGK	11.5494	WBGene00004418	rpl-7	F53G12.10	Concise description: rpl-7 encodes a large ribosomal subunit L7 protein required in mass RNAi assays for embryonic viability and normally rapid growth. Provisional description: rpl-7 encodes a large ribosomal subunit L7 protein required in mass RNAi assays for embryonic viability and normally rapid growth. Detailed description: none available
177855	WBGene00006699	C47E12.5	Q3S1J5	31	3.6521	4	3	0.028	23120	0.865052	LSETDCQPR	LISGQQIDILQK	9	5	0.047	23662	1.90178	IDDATGEQVR	LSETDCQPR	1.38342	WBGene00006699	uba-1	C47E12.5a	Concise description: uba-1 encodes the only known ubiquitin-activating enzyme in C. elegans and is orthologous to Saccharomyces cerevisiae UBA1 and human UBE1; UBA-1 is essential for embryogenesis and larval development and is required for proper formation of the male tail, sperm fertility, proper body size, meiotic progression in the embryo and germline development; by homology, UBA-1 is predict…
178415	WBGene00001336	Y41E3.4	I2HAI0	38	3.6449	12	8	0.106	23120	2.59516	DAEGHVTEVVVK	FDDTNPEKEEEK	11	8	0.112	23662	2.3244	DAEGHVTEVVVK	EASPEEFADGAETMDELLR	2.45978	WBGene00001336	qars-1	Y41E3.4a	Concise description: qars-1 encodes a glutaminyl (Q) tRNA synthetase that affects growth and embryonic and larval viability in large-scale RNAi screens; it is predicted to be mitochondrial. Provisional description: qars-1 encodes a glutaminyl (Q) tRNA synthetase that affects growth and embryonic and larval viability in large-scale RNAi screens; it is predicted to be mitochondrial. Detailed descri…
175584	WBGene00004470	F56F3.5	P48154	69	3.6426	57	19	0.642	23120	12.327	VFEVSLGDLNNSEADFR	NVLTNFHAMSMTHDK	57	19	0.634	23662	12.0446	VFEVSLGDLNNSEADFRK	VFEVSLGDLNNSEADFR	12.1858	WBGene00004470	rps-1	F56F3.5	Concise description: rps-1 encodes a small ribosomal subunit S3A protein. Provisional description: rps-1 encodes a small ribosomal subunit S3A protein. Detailed description: none available
175338	WBGene00004491	F53A3.3	A8WIR1	47	3.6312	18	6	0.423	23120	3.89273	MNVLADALNAINNAEK	YTNTLLPSR	21	8	0.577	23662	4.43749	MNVLADALNAINNAEK	YTNTLLPSR	4.16511	WBGene00004491	rps-22	F53A3.3a	Concise description: rps-22 encodes a small ribosomal subunit S15a protein. Provisional description: rps-22 encodes a small ribosomal subunit S15a protein. Detailed description: none available
177243	WBGene00017121	E04A4.7	P19974	51	3.5996	23	7	0.586	23120	4.97405	TGPTLHGVIGR	ETLFEYLLNPK	19	7	0.586	23662	4.01488	TGPTLHGVIGR	ETLFEYLLNPK	4.49446	WBGene00017121	cyc-2.1	E04A4.7	Concise description: cyc-2.1 encodes, along with cyc-2.2, one of two C. elegans cytochrome c proteins; the product of cyc-2.1 is predicted to function in the electron transport chain by transferring electrons from respiratory chain Complex III to Complex IV; large-scale RNAi screens indicate the cyc-2.1 activity is required for embryonic and larval development as well as for normal brood sizes an…
171949	WBGene00004425	C32E8.2	P91128	68	3.5968	52	11	0.454	23120	11.2457	KGDSSAEELK	GDVLPLSHTITFDEPR	56	13	0.493	23662	11.8333	GDVLPLSHTITFDEPR	GNQMLGNAHFR	11.5395	WBGene00004425	rpl-13	C32E8.2a	Concise description: rpl-13 encodes a large ribosomal subunit L13 protein. Provisional description: rpl-13 encodes a large ribosomal subunit L13 protein. Detailed description: none available
176503	WBGene00004302	K01G5.4	O17915	49	3.5874	16	6	0.279	23120	3.46021	VCENIPIVLCGNK	FNVWDTAGQEK	18	6	0.279	23662	3.80357	VCENIPIVLCGNK	FNVWDTAGQEK	3.63189	WBGene00004302	ran-1	K01G5.4	Concise description: ran-1 encodes the C. elegans Ran GTPase ortholog; ran-1 activity is essential for proper mitotic spindle formation, effective connection between centrosomes and the male pronucleus, nuclear envelope assembly after cell division, and oocyte meiotic maturation; in regulating nuclear envelope dynamics, ran-1 appears to function upstream of MEL-28 by regulating its localization t…
178686	WBGene00021486	Y40B10A.1	Q3LFN1	31	3.5808	5	3	0.226	23120	1.08131	WNFVSSENFDEYLK	PIQTDLVGK	4	2	0.168	23662	0.845237	WNFVSSENFDEYLK	PIQTDLVGK	0.963274	WBGene00021486	lbp-9	Y40B10A.1a	Concise description: none available Provisional description: none available Detailed description: none available
175212	WBGene00002269	Y55B1AR.1	Q9N384	31	3.5509	5	3	0.281	23120	1.08131	FDEGAVVNNSTSGGGWQSEDR	LVLLPTSADSR	6	3	0.281	23662	1.26786	FDEGAVVNNSTSGGGWQSEDR	LVLLPTSADSR	1.17458	WBGene00002269	lec-6	Y55B1AR.1	Concise description: lec-6 encodes a 'proto' type galectin (beta-galactosyl-binding lectin) containing a single carbohydrate recognition domain; by homology, LEC-6 may play roles in cell adhesion and aggregation, proliferation, or programmed cell death, but as loss of lec-6 activity via large-scale RNAi screens does not result in obvious abnormalities, the precise role of LEC-6 in C. elegans deve…
2565697	WBGene00010965	MTCE.31	G5EGS6	24	3.5347	3	2	0.091	23120	0.648789	SLDQLSLGEPR	CVIPCDTNIR	2	2	0.091	23662	0.422619	SLDQLSLGEPR	CVIPCDTNIR	0.535704	WBGene00010965	MTCE.31	MTCE.31	Concise description: none available Provisional description: none available Detailed description: none available
178692	WBGene00017719	F22F7.1	Q8IA58	25	3.5204	2	2	0.064	23120	0.432526	DVSNAAVIVADSADER	SQYYDATSR	4	3	0.087	23662	0.845237	DVSNAAVIVADSADER	LNEMAR	0.638881	WBGene00017719	F22F7.1	F22F7.1a	Concise description: none available Provisional description: none available Detailed description: none available
176024	WBGene00004189	T20H4.3	Q65ZK5	35	3.5108	7	5	0.1	23120	1.51384	EIEEQGAEVR	EVTGQEYAAPNAR	8	5	0.1	23662	1.69047	EIEEQGAEVR	SLLDEIHTAMYNK	1.60215	WBGene00004189	pars-1	T20H4.3a	Concise description: prs-1 encodes a predicted cytoplasmic prolyl-tRNA synthetase (ProRS), a class II aminoacyl-tRNA synthetase that catalyzes the attachment of proline to its cognate tRNA and is thus required for protein biosynthesis; PRS-1 is required for embryonic, germline, and postembryonic development. Provisional description: prs-1 encodes a predicted cytoplasmic prolyl-tRNA synthetase (Pr…
180251	WBGene00000214	Y39B6A.20	G5EEI4	55	3.5061	38	11	0.366	23120	8.21799	DQVISDTGTSWLGAPNTIVSAIVK	NLQIAQGTPGGLITYGAIDTVNCAK	29	10	0.366	23662	6.12797	DQVISDTGTSWLGAPNTIVSAIVK	NLQIAQGTPGGLITYGAIDTVNCAK	7.17298	WBGene00000214	asp-1	Y39B6A.20	Concise description: asp-1 encodes a homolog of cathepsin D aspartic protease; it is transcribed exclusively in intestinal cells of the late embryo and early larvae and is not observed in older larvae or adults; ASP-1 is dispensable for neuronal degeneration. Provisional description: asp-1 encodes a homolog of cathepsin D aspartic protease; it is transcribed exclusively in intestinal cells of the…
179063	WBGene00020950	W02F12.5	O45148	52	3.5059	29	8	0.322	23120	6.27163	SAPPVARPPSTPSSSTPVGAVPVTR	AAAYALQESPVVNAVLDENEIVYR	31	8	0.3	23662	6.55059	SAPPVARPPSTPSSSTPVGAVPVTR	SDVITVEGPAFAESISEGDIR	6.41111	WBGene00020950	dlst-1	W02F12.5	Concise description: none available Provisional description: none available Detailed description: none available
173058	WBGene00006876	ZK1151.1	G5EFM4	36	3.5046	3	2	0.002	23120	0.648789	AEELKK	LAGDIR	4	2	0.002	23662	0.845237	AEELKK	LAGDIR	0.747013	WBGene00006876	vab-10	ZK1151.1a	Concise description: vab-10 encodes, by alternative splicing, two spectraplakins (VAB-10A and VAB-10B) that are jointly required for mechanical resilience of the epidermis under strain by the contraction of actin microfilaments mechanically linked to fibrous organelles (FOs); VAB-10A/B are, accordingly, required for elongation during embryonic morphogenesis; VAB-10A has C-terminal plectin repeats…
174803	WBGene00001679	F13D12.7	D1MN68	30	3.503	3	3	0.1	23120	0.648789	LIVWDSYTTNK	ELPGHTGYLSCCR	6	4	0.132	23662	1.26786	LIVWDSYTTNK	ELPGHTGYLSCCR	0.958325	WBGene00001679	gpb-1	F13D12.7a	Concise description: gpb-1 encodes a heterotrimeric G protein beta subunit that is required during embryonic development for the proper orientation of the mitotic spindle during early cell divisions and thus affects the orientation of early cell division axes, and is also required for larval viability, negatively regulates locomotion and egg-laying, and may affect germline development and osmotic…
181789	WBGene00020732	T23E7.2	T23E7.2	50	3.5	23	11	0.181	23120	4.97405	QSYTPISPFVSTANK	ATPAATPAATATPAATATPAATGTPK	29	13	0.21	23662	6.12797	ATPAATPAATATPAATATPAATGTPK	ADTAFNFEETPATPR	5.55101	WBGene00020732	T23E7.2	T23E7.2a	Concise description: none available Provisional description: none available Detailed description: none available
266969	WBGene00006436	W06H8.8	G4SLD6	51	3.4902	20	7	0.005	23120	4.32526	DVPVPETSAPTVEPTVEK	DVSVPETSAPTVEPTVEK	26	10	0.008	23662	5.49404	ETSEVQPAEIVEQK	ETSEVEPAEIVEQK	4.90965	WBGene00006436	ttn-1	W06H8.8a	Concise description: ttn-1, through multiple splicing, encodes at least six protein isoforms that are orthologs of titin (OMIM:188840, mutated in cardiomyopathy or tibial muscular dystrophy), with the three largest isoforms being 2.2 MDa, 1.2 MDa and 301 kDa; TTN-1 isoforms are expressed in body wall and vulval muscle, localized to the centers of I-bands, with the two largest isoforms expressed i…
176891	WBGene00004427	K11H12.2	P91374	54	3.4862	27	10	0.397	23120	5.8391	VLNSYWVAEDSTYK	THGVNELK	26	9	0.402	23662	5.49404	VLNSYWVAEDSTYK	FYEVVLIDPFHK	5.66657	WBGene00004427	rpl-15	K11H12.2	Concise description: rpl-15 encodes a large ribosomal subunit L15 protein. Provisional description: rpl-15 encodes a large ribosomal subunit L15 protein. Detailed description: none available
178028	WBGene00011128	R07H5.8	R07H5.8	42	3.4811	13	5	0.17	23120	2.81142	VAQWILNAPNR	VEYIPGGAAQNSLR	16	7	0.246	23662	3.38095	VAQWILNAPNR	VEYIPGGAAQNSLR	3.09619	WBGene00011128	R07H5.8	R07H5.8	Concise description: none available Provisional description: none available Detailed description: none available
179795	WBGene00007150	B0365.1	P90731	15	3.4805								11	7	0.065	23662	2.3244	DLISSLTSGLLTIGDR	IGNTGGMMDNILASK	1.1622	WBGene00007150	acly-2	B0365.1	Concise description: none available Provisional description: none available Detailed description: none available
174526	WBGene00014258	ZK1320.9	ZK1320.9	27	3.4793	3	2	0.059	23120	0.648789	IVPFLTQGSGVVTTR	QSGGEEMSETEQR	4	3	0.081	23662	0.845237	IVPFLTQGSGVVTTR	QSGGEEMSETEQR	0.747013	WBGene00014258	ZK1320.9	ZK1320.9	Concise description: none available Provisional description: none available Detailed description: none available
179154	WBGene00004499	C26F1.4	Q18231	51	3.447	11	3	0.131	23120	2.37889	RYVNVASGPGK	YVNVASGPGK	12	2	0.085	23662	2.53571	RYVNVASGPGK	YVNVASGPGK	2.4573	WBGene00004499	rps-30	C26F1.4	Concise description: rps-30 encodes two proteins, a small ribosomal subunit S30 protein and ubiquitin, which is cleaved from the ribosomal protein posttranslationally; by homology, S30 is predicted to function in protein biosynthesis and ubiquitin in protein degradation; in C. elegans, loss of rps-30 function via RNA-mediated interference (RNAi) does not result in any obvious abnormalities. Provi…
178830	WBGene00017982	F32D1.2	O16298	36	3.4469	4	3	0.463	23120	0.865052	YSQIAAEITR	KPEATLK	6	3	0.463	23662	1.26786	YSQIAAEITR	ITTWENGK	1.06646	WBGene00017982	hpo-18	F32D1.2	Concise description: none available Provisional description: none available Detailed description: none available
181775	WBGene00003370	C36E6.5	P19626	70	3.4461	53	13	0.782	23120	11.4619	LTGTDPEATIVGAFAMFDK	DLYASMGQIAPDSQIDAMIK	52	14	0.782	23662	10.9881	LTGTDPEATIVGAFAMFDK	EASGPINFTVFLTLFGER	11.225	WBGene00003370	mlc-2	C36E6.5	Concise description: mlc-2 encodes, along with mlc-1 and mlc-4, one of three C. elegans regulatory myosin light chains; MLC-2 is predicted to function as a regulator of myosin ATPase activity, and genetic studies indicate that MLC-2 is nearly essential in hermaphrodites for normal pharyngeal muscle function, but redundant with MLC-1, with which it is nearly identical, for proper bodywall muscle d…
177524	WBGene00019900	R05G6.7	Q21752	56	3.4179	27	9	0.371	23120	5.8391	VNSSSQVAVAATHSLSPALK	VTADVGVTSAPVINAAGVFSR	17	8	0.3	23662	3.59226	VTADVGVTSAPVINAAGVFSR	VTLDSLYAPHAGK	4.71568	WBGene00019900	R05G6.7	R05G6.7	Concise description: none available Provisional description: none available Detailed description: none available
174371	WBGene00004416	F54C9.5	P49405	65	3.4159	43	14	0.481	23120	9.29931	FLAAGLNADNLVATYQK	GVADGGINVPHSESR	46	14	0.539	23662	9.72023	GVADGGINVPHSESR	FLAAGLNADNLVATYQK	9.50977	WBGene00004416	rpl-5	F54C9.5	Concise description: rpl-5 encodes a large ribosomal subunit L5 protein; by homology, RPL-5 is predicted to function in protein biosynthesis; in C. elegans RPL-5 activity is broadly required for embryonic, larval, germline, and vulval development, as well as normal body coloration, morphology, and postembryonic growth rates. Provisional description: rpl-5 encodes a large ribosomal subunit L5 prot…
179945	WBGene00009082	F23B12.5	dlat-1	55	3.4112	29	10	0.28	23120	6.27163	VPEANSYWMDSFIR	DFKDDGASSGGSAPAAEK	32	12	0.296	23662	6.7619	GATSTTTQAVSGQDYTDIPLSNMR	VPEANSYWMDSFIR	6.51677	WBGene00009082	dlat-1	F23B12.5	Concise description: F23B12.5 is orthologous to the human gene DIHYDROLIPOAMIDE DEHYDROGENASE (DLD; OMIM:109720), which when mutated leads to lactic acidosis due to lipoamide dehydrogenase deficiency. Provisional description: F23B12.5 is orthologous to the human gene DIHYDROLIPOAMIDE DEHYDROGENASE (DLD; OMIM:109720), which when mutated leads to lactic acidosis due to lipoamide dehydrogenase defic…
181062	WBGene00001000	C18A11.7	Q18066	69	3.4108	48	15	0.522	23120	10.3806	LTGFSSPTFVEKPQISSR	QNDDGSLELECFVDANPTPQVK	52	14	0.515	23662	10.9881	QNDDGSLELECFVDANPTPQVK	LTGFSSPTFVEKPQISSR	10.6844	WBGene00001000	dim-1	C18A11.7a	Concise description: dim-1 encodes novel proteins containing three immunoglobulin-like repeats in the carboxy terminus; dim-1 was originally identified in screens for mutations that suppress locomotion defects caused by aberrant muscle assembly in animals carrying a missense mutation in unc-112, which encodes a pleckstrin homology domain-containing protein required for the early stages of muscle …
179442	WBGene00010627	K07C5.4	K07C5.4	50	3.4007	22	11	0.247	23120	4.75779	YPASTVQILGAEK	VDCFSETPVSTYGEFLR	24	12	0.305	23662	5.07142	NTEAALENCNSISEGLAHPDLTNFLQK	YPASTVQILGAEK	4.9146	WBGene00010627	K07C5.4	K07C5.4	Concise description: none available Provisional description: none available Detailed description: none available
172009	WBGene00004464	R12E2.3	O61792	44	3.4005	14	9	0.293	23120	3.02768	SVVALHNLIDNK	TLDIGNSFAVPFDEDDKDK	14	8	0.271	23662	2.95833	SVVALHNLIDNK	FCPNPVLVIIDAEPK	2.99301	WBGene00004464	rpn-8	R12E2.3	Concise description: none available Provisional description: none available Detailed description: none available
177880	WBGene00010677	K08F4.2	Q21351	41	3.3941	16	6	0.152	23120	3.46021	EIVPSNTAQAESEIK	APVPEPVQEQPK	10	5	0.123	23662	2.11309	EIVPSNTAQAESEIK	APVPEPVQEQPK	2.78665	WBGene00010677	K08F4.2	K08F4.2	Concise description: none available Provisional description: none available Detailed description: none available
176148	WBGene00002011	C14B9.1	P34328	37	3.3865	9	4	0.336	23120	1.94637	VSGQELLIHCR	LPDDVDVSTVK	7	3	0.282	23662	1.47916	VSGQELLIHCR	LPDDVDVSTVK	1.71277	WBGene00002011	hsp-12.2	C14B9.1	Concise description: hsp-12.2 encodes a small heat-shock protein that forms heterotetramers with HSP-12.3 and has no chaperone-like activity; structurally, HSP-12.2 is mostly a beta-sheet; at least one HSP-12 (which may or may not be HSP-12.2) is ubiquitously expressed in L1 larvae, and later expressed in adult spermatids (and perhaps spermatocytes), and some adult vulval cells. Provisional descr…
178173	WBGene00004448	C42C1.14	A3QMC5	54	3.382	27	6	0.455	23120	5.8391	AYGGCLSPNAVK	AFLVEEQK	27	6	0.455	23662	5.70535	AYGGCLSPNAVK	AFLVEEQK	5.77222	WBGene00004448	rpl-34	C42C1.14	Concise description: rpl-34 encodes a putative large ribosomal subunit L34 protein that inhibits DHC-1 in vivo; RPL-34 is expressed in most somatic tissues of larvae and adults; in mass RNAi assays, RPL-34 is required for embryonic and larval development, normally rapid growth, and normal body coloration. Provisional description: rpl-34 encodes a putative large ribosomal subunit L34 protein that …
174141	WBGene00004930	C15F1.7	P34697	38	3.3734	8	4	0.335	23120	1.7301	HVGDLGNVEAGADGVAK	LTDTLVTLYGPNTVVGR	11	6	0.525	23662	2.3244	HVGDLGNVEAGADGVAK	LTDTLVTLYGPNTVVGR	2.02725	WBGene00004930	sod-1	C15F1.7a	Concise description: sod-1 encodes the copper/zinc superoxide dismustase, an enzyme that is known to protect cells from oxidative damage; superoxide dismutase activity can be detected in worm extracts; sod-1 activity has been implicated in the increased life-span of dauer larvae where this enzyme demonstrates the highest activity compared to other life-stages as well as in the increased life span…
172901	WBGene00004476	ZC434.2	Q23312	58	3.3682	29	9	0.51	23120	6.27163	TLTAVHDAWLDELVYPAEVVGR	QVSQALIDLETNDDVQSQLK	40	12	0.649	23662	8.45237	TLTAVHDAWLDELVYPAEVVGR	QVSQALIDLETNDDVQSQLK	7.362	WBGene00004476	rps-7	ZC434.2	Concise description: rps-7 encodes a small ribosomal subunit S7 protein. Provisional description: rps-7 encodes a small ribosomal subunit S7 protein. Detailed description: none available
178407	WBGene00013311	Y57G11C.15	O18239	42	3.3674	10	6	0.137	23120	2.16263	SMIHELNR	GTEFEGAVIALFHLLATR	10	5	0.101	23662	2.11309	SMIHELNR	AFSPATMNTGR	2.13786	WBGene00013311	Y57G11C.15	Y57G11C.15a	Concise description: none available Provisional description: none available Detailed description: none available
173374	WBGene00000881	F31C3.1	P52013	31	3.3669	4	3	0.123	23120	0.865052	TATNFIELAK	ILEGMDVVR	4	2	0.093	23662	0.845237	TATNFIELAK	ILEGMDVVR	0.855144	WBGene00000881	cyn-5	F31C3.1	Concise description: cyn-5 encodes a cyclophilin that is functional in vitro and is predicted to be a secreted protein that is structurally most similar to human cyclophilin B; expressed in the intestine. Provisional description: cyn-5 encodes a cyclophilin that is functional in vitro and is predicted to be a secreted protein that is structurally most similar to human cyclophilin B; expressed in …
175879	WBGene00004472	C23G10.3	P48152	69	3.3586	45	15	0.615	23120	9.73183	FVDGLMIHSGHPVNDYIQQAVR	NALPDHVQIVEPQEEVLPK	52	18	0.66	23662	10.9881	FVDGLMIHSGHPVNDYIQQAVR	NALPDHVQIVEPQEEVLPK	10.36	WBGene00004472	rps-3	C23G10.3	Concise description: rps-3 encodes a small ribosomal subunit S3 protein that contains a KH RNA-binding domain and by homology,is predicted to function in protein biosynthesis; in C. elegans, RPS-3 activity is required for embryonic and germline development, as well as the overall health of the animal. Provisional description: rps-3 encodes a small ribosomal subunit S3 protein that contains a KH R…
184918	WBGene00017771	F25B4.8	F25B4.8	55	3.3565	26	8	0.643	23120	5.62284	SNPDAVAIMPHCIDGK	SEVQHFGSCHCGAVK	19	7	0.543	23662	4.01488	SNPDAVAIMPHCIDGK	MSEVQHFGSCHCGAVK	4.81886	WBGene00017771	F25B4.8	F25B4.8a	Concise description: none available Provisional description: none available Detailed description: none available
178408	WBGene00004487	Y57G11C.16	O18240	68	3.3563	47	10	0.584	23120	10.1644	TGQLLSTAVDNK	IVTIMQNPSQYK	47	11	0.584	23662	9.93154	TGQLLSTAVDNK	IVTIMQNPSQYK	10.048	WBGene00004487	rps-18	Y57G11C.16	Concise description: rps-18 encodes a small ribosomal subunit S18 protein. Provisional description: This gene encodes a protein predicted by Eisenberg and coworkers, with 52 percentage accuracy, to be mitochondrial. Proteins localized to a given organelle by experiments tend to share a characteristic phylogenetic distribution of their homologs, called a phylogenetic profile. For instance, mitocho…
172134	WBGene00016258	C30F8.2	Q95YD5	34	3.3417	5	4	0.172	23120	1.08131	GEFLFNIDHGYLEALTR	GGLLAQADYANLVQCETLEDLK	3	3	0.141	23662	0.633928	MGEFLFNIDHGYLEALTR	GGLLAQADYANLVQCETLEDLK	0.857619	WBGene00016258	vha-16	C30F8.2	Concise description: vha-16 encodes an an ortholog of subunit d of the membrane-bound (V0) domain of vacuolar proton-translocating ATPase (V-ATPase); VHA-16 is predicted to mechanically anchor the V-ATPase cytosolic rotor (stalk) to the membrane, while also providing a hub for the V-ATPase transmembrane rotor; vha-16 is expressed in diverse tissues (e.g., excretory cell, pharynx, intestine, hypod…
175925	WBGene00004503	F23F12.6	P46502	47	3.3363	13	8	0.258	23120	2.81142	ENSPSIIFIDEIDAIATK	MNLSDDVDLEDWVARPDK	15	8	0.225	23662	3.16964	ENSPSIIFIDEIDAIATK	ISGADINSICQEAGMQAVR	2.99053	WBGene00004503	rpt-3	F23F12.6	Concise description: rpt-3 encodes a triple A ATPase subunit of the 26S proteasome's 19S regulatory particle (RP) base subcomplex; RPT-3 is required for embryonic, larval, and germline development and by homology, is predicted to function in unfolding protein substrates and translocating them into the core proteolytic particle (CP) of the proteasome. Provisional description: rpt-3 encodes a tripl…
174699	WBGene00004478	F40F8.10	Q20228	60	3.336	23	12	0.503	23120	4.97405	ELLTLEDKDPK	QVVDVPSFIVR	27	11	0.487	23662	5.70535	ELLTLEDKDPK	QVVDVPSFIVR	5.3397	WBGene00004478	rps-9	F40F8.10	Concise description: rps-9 encodes a small ribosomal subunit S9 protein. Provisional description: rps-9 encodes a small ribosomal subunit S9 protein. Detailed description: none available
175472	WBGene00003962	C14B1.1	Q17967	48	3.3346	20	10	0.262	23120	4.32526	YDEAADLLKEEGSDIK	AQDLPEDWNALPVK	16	8	0.21	23662	3.38095	VLVASNFNEIALDETK	YDEAADLLKEEGSDIK	3.8531	WBGene00003962	pdi-1	C14B1.1	Concise description: pdi-1 encodes a protein disulfide isomerase; loss of function mutations in pdi-1 result in no obvious abnormalities, but animals triply mutant for three C. elegans PDI's, encoded by pdi-1, pdi-2, and pdi-3, display embryonic lethality characterized by loss of vermiform morphology after elongation, suggesting that the pdi genes function redundantly in embryonic morphogenesis; …
178844	WBGene00020369	T08H10.1	T08H10.1	27	3.329	3	2	0.069	23120	0.648789	LPFTAHAPEDVPK	VLHEYISSGK	3	2	0.084	23662	0.633928	LPFTAHAPEDVPK	LSDEDMHTLNSIETR	0.641359	WBGene00020369	T08H10.1	T08H10.1	Concise description: none available Provisional description: none available Detailed description: none available
177775	WBGene00010317	F59B8.2	H9G2T3	57	3.3287	31	15	0.414	23120	6.70415	NSALETFANNLEAVCIETMEAGFLTK	FVSADGTQTIQETVFDFK	34	15	0.384	23662	7.18452	FVSADGTQTIQETVFDFK	DATDDQVTIDAANATLK	6.94433	WBGene00010317	idh-1	F59B8.2a	Concise description: idh-1 encodes a predicted cytosolic isocitrate dehydrogenase; by homology, IDH-1 is predicted to catalyze the formation of alpha-ketoglutarate from isocitrate. Provisional description: idh-1 encodes a predicted cytosolic isocitrate dehydrogenase; by homology, IDH-1 is predicted to catalyze the formation of alpha-ketoglutarate from isocitrate. Detailed description: none availa…
175901	WBGene00004482	C16A3.9	P51404	63	3.3242	27	7	0.411	23120	5.8391	MTAEEVQDQIVK	GMAPELPEDLYHLVK	32	8	0.457	23662	6.7619	MTAEEVQDQIVK	GMAPELPEDLYHLVK	6.3005	WBGene00004482	rps-13	C16A3.9	Concise description: rps-13 encodes a small ribosomal subunit S13 protein; by homology, RPS-13 is predicted to function in protein biosynthesis; in C. elegans, RPS-13 activity is required for embryonic and germline development. Provisional description: rps-13 encodes a small ribosomal subunit S13 protein; by homology, RPS-13 is predicted to function in protein biosynthesis; in C. elegans, RPS-13 …
177906	WBGene00008506	F01G10.1	O17759	58	3.323	35	15	0.277	23120	7.5692	LGQSQATSLGHDVETYK	SGPPDALVDMYGISAR	32	15	0.288	23662	6.7619	SGPPDALVDMYGISAR	TIPGATVFYPTDAVSAER	7.16555	WBGene00008506	tkt-1	F01G10.1	Concise description: tkt-1 encodes an ortholog of the human gene TRANSKETOLASE (TKT; OMIM:606781), which when mutated leads to Wernicke-Korsakoff syndrome (OMIM:277730). Provisional description: tkt-1 encodes an ortholog of the human gene TRANSKETOLASE (TKT; OMIM:606781), which when mutated leads to Wernicke-Korsakoff syndrome (OMIM:277730). Detailed description: none available
266820	WBGene00004888	K12C11.2	P55853	30	3.3216	3	2	0.264	23120	0.648789	ADDAAQAGDNAEYIK	TGVAVNSLR	5	4	0.473	23662	1.05655	MADDAAQAGDNAEYIK	TGVAVNSLR	0.852669	WBGene00004888	smo-1	K12C11.2	Concise description: smo-1 encodes the C. elegans ortholog of SUMO, a small ubiquitin-like moiety that, when attached to protein substrates, regulates their subcellular localization and activity; smo-1 is an essential gene: loss of its activity results in embryonic and larval lethality; in addition, smo-1 mutants have defects in synaptonemal complex disassembly and bivalent formation, enhance mei…
179739	WBGene00004442	R11D1.8	Q21930	59	3.3167	22	9	0.508	23120	4.75779	SDALVWQVIR	AVTTSTLSK	21	9	0.556	23662	4.43749	MSDALVWQVIR	AVTTSTLSK	4.59764	WBGene00004442	rpl-28	R11D1.8	Concise description: rpl-28 encodes a large ribosomal subunit L28 protein. Provisional description: rpl-28 encodes a large ribosomal subunit L28 protein. Detailed description: none available
172921	WBGene00004444	Y106G6H.3	I2HAJ2	60	3.3012	35	9	0.609	23120	7.5692	TGQYVLGYK	LVIIANNTPPLRK	35	8	0.452	23662	7.39582	TGQYVLGYK	LVIIANNTPPLR	7.48251	WBGene00004444	rpl-30	Y106G6H.3a	Concise description: rpl-30 encodes a large ribosomal subunit L30 protein; by homology, RPL-30 is predicted to function in protein biosynthesis; in C. elegans, loss of rpl-30 function via RNA-mediated interference (RNAi) does not result in any obvious abnormalities. Provisional description: rpl-30 encodes a large ribosomal subunit L30 protein; by homology, RPL-30 is predicted to function in prote…
177619	WBGene00006930	K07H8.6	P18948	66	3.2671	38	18	0.127	23120	8.21799	QIEQGEAELEAAHTVAR	SYANNESPCEQTFSSR	46	24	0.167	23662	9.72023	QIEQGEAELEAAHTVAR	SYANNESPCEQTFSSR	8.96911	WBGene00006930	vit-6	K07H8.6a	Concise description: vit-6 encodes a vitellogenin precursor protein that is cleaved in the body cavity into two smaller yolk proteins, YP115 and YP88; in C. elegans, vitellogenin genes exhibit stage-, sex-, and tissue-specific expression being expressed exclusively in the adult hermaphrodite intestine. Provisional description: vit-6 encodes a vitellogenin precursor protein that is cleaved in the …
173260	WBGene00004475	Y71A12B.1	I2HAF8	68	3.2496	49	15	0.553	23120	10.5969	KGDGEIEGLTDSVLPR	MSQEVAIDALGDEWK	39	14	0.472	23662	8.24106	KGDGEIEGLTDSVLPR	MSQEVAIDALGDEWK	9.41898	WBGene00004475	rps-6	Y71A12B.1a	Concise description: rps-6 encodes a small (40S) ribosomal subunit S6 protein; loss of rps-6 activity in adult animals extends lifespan. Provisional description: rps-6 encodes a small (40S) ribosomal subunit S6 protein; loss of rps-6 activity in adult animals extends lifespan. Detailed description: none available
176146	WBGene00004433	C14B9.7	P34334	65	3.1767	36	9	0.54	23120	7.78547	GAHTVTTQNNEPELLAPLR	SAGQPVPALK	41	8	0.453	23662	8.66368	GAHTVTTQNNEPELLAPLR	SAGQPVPALK	8.22457	WBGene00004433	rpl-21	C14B9.7	Concise description: rpl-21 encodes a large ribosomal subunit L21 protein; by homology, RPL-21 is predicted to function in protein biosynthesis; in C. elegans, RPL-21 activity is required for embryonic and germline development. Provisional description: rpl-21 encodes a large ribosomal subunit L21 protein; by homology, RPL-21 is predicted to function in protein biosynthesis; in C. elegans, RPL-21 …
175162	WBGene00013168	Y53F4B.22	U4PR70	32	3.1693	6	4	0.131	23120	1.29758	TTGVVLDSGDGVTHAVPIVK	IWEYIFGQDQLK	2	1	0.053	23662	0.422619	TTGVVLDSGDGVTHAVPIVK	NA	0.8601	WBGene00013168	arp-1	Y53F4B.22	Concise description: none available Provisional description: none available Detailed description: none available
178297	WBGene00004410	Y62E10A.1	Q9U1X9	58	3.1605	18	4	0.855	23120	3.89273	NILSAVGVDADAETAK	TVEELIAEGSAGLVSVSGGAAPAAAAAPAAGGAAPAADSKPAK	12	2	0.536	23662	2.53571	TVEELIAEGSAGLVSVSGGAAPAAAAAPAAGGAAPAADSKPAK	NILSAVGVDADAETAK	3.21422	WBGene00004410	rla-2	Y62E10A.1	Concise description: rla-2 encodes an acidic ribosomal subunit protein P2. Provisional description: rla-2 encodes an acidic ribosomal subunit protein P2. Detailed description: none available
174443	WBGene00004446	T24B8.1	B7WN95	65	3.1567	37	12	0.493	23120	8.00173	YIGEIGHGVSAK	AMPTIGHGSDR	39	13	0.575	23662	8.24106	YIGEIGHGVSAK	AMPTIGHGSDR	8.12139	WBGene00004446	rpl-32	T24B8.1a	Concise description: rpl-32 encodes a large ribosomal subunit L32 protein. Provisional description: rpl-32 encodes a large ribosomal subunit L32 protein. Detailed description: none available
177442	WBGene00006917	C17H12.14	Q95X44	63	3.1461	31	12	0.544	23120	6.70415	GLVMQGLLQLLEK	LELIANQIVPQVR	40	13	0.504	23662	8.45237	HMMAFIEQEANEK	GLVMQGLLQLLEK	7.57826	WBGene00006917	vha-8	C17H12.14	Concise description: vha-8 encodes an ortholog of subunit E of the cytoplasmic (V1) domain of vacuolar proton-translocating ATPase (V-ATPase); VHA-8 is a predicted cytosolic stator (stalk) component; VHA-8 is required for embryonic and larval viability, for ovulation, and for receptor-mediated endocytosis of yolk protein; VHA-8 is highly expressed in the cytoplasm of excretory canals throughout d…
180343	WBGene00004413	B0250.1	Q9XVF7	70	3.1369	44	12	0.477	23120	9.51557	AQIQIGNIVPVGTLPEGTTICNVENK	ASGNYATVIAHNPDTK	43	11	0.473	23662	9.0863	AQIQIGNIVPVGTLPEGTTICNVENK	ASGNYATVIAHNPDTK	9.30094	WBGene00004413	rpl-2	B0250.1	Concise description: rpl-2 encodes a large ribosomal subunit L8 protein. Provisional description: rpl-2 encodes a large ribosomal subunit L8 protein. Detailed description: none available
181324	WBGene00000040	ZK455.1	Q23500	34	3.1088	5	5	0.063	23120	1.08131	LDLGSVVPSVSGPK	TIDYLTQTGR	6	5	0.065	23662	1.26786	TIDYLTQTGR	SVTITNHGR	1.17458	WBGene00000040	aco-1	ZK455.1	Concise description: aco-1 encodes an aconitase that is homologous to mammalian iron regulatory protein-1 (IRP1); aco-1 activity is required for normal brood sizes and, under iron stress conditions, for normal lifespan and L4-to-adult growth rates; ACO-1 physically interacts with GEX-3; like IRP1, ACO-1 has aconitase activity and is post-translationally regulated by iron, but, unlike IRP1, it lac…
171853	WBGene00004412	Y71F9AL.13	Q95Y46	62	3.1075	33	9	0.44	23120	7.13668	FPSVVTHGESLQSK	VCVFGDQHHLDEAAAGDIPSMSADDLK	34	9	0.44	23662	7.18452	VCVFGDQHHLDEAAAGDIPSMSADDLK	FPSVVTHGESLQSK	7.1606	WBGene00004412	rpl-1	Y71F9AL.13a	Concise description: rpl-1 encodes a large ribosomal subunit L10a protein; by homology, RPL-1 is predicted to function in protein biosynthesis; in C. elegans, RPL-1 activity is essential for embryonic development. Provisional description: rpl-1 encodes a large ribosomal subunit L10a protein; by homology, RPL-1 is predicted to function in protein biosynthesis; in C. elegans, RPL-1 activity is esse…
175026	WBGene00001889	ZK131.9	P04255	60	3.1012								39	11	0.541	23662	8.24106	AMSIMNSFVNDVFER	NSFVNDVFER	4.12053	WBGene00001889	his-15	ZK131.9	Concise description: his-15 encodes an H2B histone. Provisional description: his-15 encodes an H2B histone. Detailed description: none available
179998	WBGene00004485	T01C3.6	Q22054	63	3.1004	28	13	0.729	23120	6.05536	VSGGGHVAQIYAVR	LQEPLLLVGK	41	14	0.736	23662	8.66368	VSGGGHVAQIYAVR	TSTVQSVQTFGR	7.35952	WBGene00004485	rps-16	T01C3.6	Concise description: rps-16 encodes a small ribosomal subunit S16 protein. Provisional description: rps-16 encodes a small ribosomal subunit S16 protein. Detailed description: none available
175413	WBGene00006725	H06I04.4	P37165	62	3.0789	27	3	0.233	23120	5.8391	CHDTLVVDTATAAATSGEK	CHDTLVVDTATAAATSGEK	27	3	0.233	23662	5.70535	CHDTLVVDTATAAATSGEK	CHDTLVVDTATAAATSGEK	5.77222	WBGene00006725	ubl-1	H06I04.4a	Concise description: ubl-1 encodes a protein similar to Drosophila ubiquitin/ ribosomal protein S27a that affects body length, fertility, and larval viability. Provisional description: ubl-1 encodes a protein similar to Drosophila ubiquitin/ ribosomal protein S27a that affects body length, fertility, and larval viability. Detailed description: none available
182726	WBGene00007646	C17E4.9	Q93235	35	3.0753	5	4	0.184	23120	1.08131	GTIIGVNPGVGYQPWLK	ECGAGDSNDDLEKNPDALPCR	9	5	0.216	23662	1.90178	GTIIGVNPGVGYQPWLK	GATNVDQEHIGK	1.49154	WBGene00007646	nkb-1	C17E4.9	Concise description: none available Provisional description: none available Detailed description: none available
177787	WBGene00001239	F56H11.4	G5EEE5	32	3.0692	4	2	0.056	23120	0.865052	AQHPLVQR	NFPDAEGR	5	3	0.101	23662	1.05655	MTPEFFGTIANK	MAQHPLVQR	0.960801	WBGene00001239	elo-1	F56H11.4a	Concise description: elo-1 encodes a component of C-18 polyunsaturated fatty acid (PUFA) elongase that is required for normal elongation of n-6 and n-3 20-carbon PUFA in vivo; ELO-1 is a condensing enzyme that elongates n-6 and n-7 (and, with less efficiency, n-3) series C18 PUFAs. Provisional description: elo-1 encodes a component of C-18 polyunsaturated fatty acid (PUFA) elongase that is requir…
171766	WBGene00004409	Y37E3.7	P91913	70	3.0631	40	10	0.991	23120	8.65052	NLITSVSSGAGSGPAPAAAAAAPAAGGAAPAAETK	ASNQELACVYAALILQDDEVAITGEK	43	12	0.829	23662	9.0863	MASNQELACVYAALILQDDEVAITGEK	NLITSVSSGAGSGPAPAAAAAAPAAGGAAPAAETK	8.86841	WBGene00004409	rla-1	Y37E3.7	Concise description: rla-1 encodes an acidic ribosomal subunit protein P1. Provisional description: rla-1 encodes an acidic ribosomal subunit protein P1. Detailed description: none available
177190	WBGene00000123	F36A4.7	P16356	10	3.0625	4	4	0.024	23120	0.865052	AEIEEIAMVPR	IIITPEGGFK								0.432526	WBGene00000123	ama-1	F36A4.7	Concise description: ama-1 encodes the large subunit of RNA polymerase II required for mRNA transcription; AMA-1 is essential for proper embryonic development, particularly for the early division and migration of the endodermal precursor (E) cells that initiate gastrulation; AMA-1 is expressed ubiquitously in the developing embryo until the 550-cell stage. Provisional description: At the onset of…
176626	WBGene00013238	Y56A3A.21	Q9U238	37	3.0621	8	3	0.34	23120	1.7301	DAGAQTFNINIFDEEGAAQYAK	LIPVSISDETAK	9	4	0.34	23662	1.90178	DAGAQTFNINIFDEEGAAQYAK	DAGAQTFNINIFDEEGAAQYAK	1.81594	WBGene00013238	trap-4	Y56A3A.21	Concise description: none available Provisional description: none available Detailed description: none available
180748	WBGene00004438	F55D10.2	P48162	58	3.0581	27	8	0.435	23120	5.8391	LTADYDALDVANK	IIQHPLTTESAMK	26	7	0.435	23662	5.49404	IIQHPLTTESAMK	LTADYDALDVANK	5.66657	WBGene00004438	rpl-25.1	F55D10.2	Concise description: rpl-25.1 encodes a large ribosomal subunit L23a protein. Provisional description: rpl-25.1 encodes a large ribosomal subunit L23a protein. Detailed description: none available
177533	WBGene00002074	F32E10.4	Q19969	32	3.0502	4	2	0.037	23120	0.865052	CKDPAPSPAVVR	VQTAALR	3	2	0.037	23662	0.633928	CKDPAPSPAVVR	VQTAALR	0.74949	WBGene00002074	ima-3	F32E10.4	Concise description: ima-3 encodes one of three C. elegans importin alpha nuclear transport factors and the importin alpha that is most similar to the alpha3-subtype; ima-3 activity is required throughout development: during oogenesis, ima-3 is essential for progression past pachytene of meiotic prophase I and for proper organization of the nuclear pore complex (NPC) as well as association of P g…
180796	WBGene00021325	Y34B4A.9	Y34B4A.9	31	3.049	4	2	0.156	23120	0.865052	LDYEVNSDVDANQACTQANK	EVETNYQAQGPSGMR	4	2	0.156	23662	0.845237	LDYEVNSDVDANQACTQANK	EVETNYQAQGPSGMR	0.855144	WBGene00021325	Y34B4A.9	Y34B4A.9	Concise description: none available Provisional description: none available Detailed description: none available
175966	WBGene00002083	F57B9.6	P27639	62	3.038	33	13	0.403	23120	7.13668	MTENQFTVSCLHGDMDQAER	GIYGFGFEKPSAIQK	31	11	0.328	23662	6.55059	MTENQFTVSCLHGDMDQAER	FDCLCDLYNVVNVTQAVIFCNTR	6.84363	WBGene00002083	inf-1	F57B9.6a	Concise description: inf-1 encodes a protein with high similarity to eukaryotic initiation factor 4A. Provisional description: inf-1 encodes a protein with high similarity to eukaryotic initiation factor 4A. Detailed description: none available
177038	WBGene00022089	Y69A2AR.18	Y69A2AR.18	62	3.0374	32	14	0.548	23120	6.92042	AILDSGYDFETGTILFNR	TFFDNIDPVVEGVEK	32	14	0.478	23662	6.7619	AILDSGYDFETGTILFNR	TFFDNIDPVVEGVEK	6.84116	WBGene00022089	Y69A2AR.18	Y69A2AR.18a	Concise description: none available Provisional description: none available Detailed description: none available
174596	WBGene00006918	ZK970.4	Q23680	37	3.0225	9	3	0.388	23120	1.94637	ILAVIGDEDTVVGFLLGGVGELNK	EAPYDPSKDSILNR	7	3	0.388	23662	1.47916	ILAVIGDEDTVVGFLLGGVGELNK	EAPYDPSKDSILNR	1.71277	WBGene00006918	vha-9	ZK970.4	Concise description: vha-9 encodes an ortholog of subunit F of the cytoplasmic (V1) domain of vacuolar proton-translocating ATPase (V-ATPase); VHA-9 is a predicted cytosolic rotor (stalk) component. Provisional description: vha-9 encodes an ortholog of subunit F of the cytoplasmic (V1) domain of vacuolar proton-translocating ATPase (V-ATPase); VHA-9 is a predicted cytosolic rotor (stalk) componen…
178170	WBGene00004025	F35G2.4	Q20065	8	3.0212	3	3	0.067	23120	0.648789	DVTTIIDQYIEAER	TGELEHATYR								0.324394	WBGene00004025	phy-2	F35G2.4	Concise description: phy-2 encodes a catalytic alpha subunit of collagen prolyl 4-hydroxylase (P4H) orthologous to human P4H alpha (II) isoform (OMIM: 600608); phy-2 is responsible for hydroxylation of cuticle collagen; loss-of-function mutations result in phenotypically wild-type animals, however phy-1; phy-2 double mutants arrest as embryos and larvae, suggesting that the PHY-1 and PHY-2 P2H al…
177106	WBGene00015248	B0546.1	O44441	40	3.006	7	2	0.147	23120	1.51384	ISEIEAQER	AQLQELR	8	3	0.22	23662	1.69047	ISEIEAQER	AQLQELR	1.60215	WBGene00015248	mai-2	B0546.1	Concise description: mai-2/B0546.1 is orthologous to mitochondrial intrinsic ATPase inhibitor protein (IF(1)), which blocks reverse action (ATP hydrolysis) by F(0)F(1)-ATPase when its (normally required) proton gradient is lost; MAI-2 has a mitochondrial import signal at its N-terminus, and is transported to yeast mitochondria; MAI-2 can inhibit yeast F(0)F(1)-ATPase, and this inhibition is pH-de…
172390	WBGene00002258	W02D3.5	O01812	51	3.0002	17	8	0.578	23120	3.67647	VEGDLWYSNQYSTFK	LGQEFDETTPDGR	15	9	0.644	23662	3.16964	VEGDLWYSNQYSTFK	LGQEFDETTPDGR	3.42306	WBGene00002258	lbp-6	W02D3.5	Concise description: none available Provisional description: none available Detailed description: none available
178083	WBGene00004480	F40F11.1	Q20206	65	2.9896	32	8	0.49	23120	6.92042	DIHPGDLVTIGECRPLSK	DAVEGTYIDKK	35	9	0.49	23662	7.39582	DIHPGDLVTIGECRPLSK	CPWAGNVPIR	7.15812	WBGene00004480	rps-11	F40F11.1	Concise description: rps-11 encodes a small ribosomal subunit S11 protein; by homology, RPS-11 is predicted to function in protein biosynthesis; in C. elegans, RPS-11 activity is required for embryonic and germline development, as well as the overall health of the animal; loss of rps-11 activity in adult animals extends lifespan. Provisional description: rps-11 encodes a small ribosomal subunit S…
175971	WBGene00002845	F57B9.2	Q20937	11	2.989								5	3	0.008	23662	1.05655	YNQLAR	QAPIQK	0.528275	WBGene00002845	let-711	F57B9.2	Concise description: let-711 encodes the C. elegans ortholog of NOT1, the conserved core component of the multisubunit CCR4/NOT complex that plays a role in regulation of gene expression via various processes including transcriptional control, mRNA deadenylation, and protein ubiquitination; in C. elegans, let-711 activity is essential for embryonic and larval development and in particular, for pr…
172401	WBGene00016493	C37A2.7	O01504	63	2.9852	34	7	0.907	23120	7.35294	VLEAGGLDCDMENANSVVDALK	LLATLGGNASPSAQDVLK	25	6	0.729	23662	5.28273	VLEAGGLDCDMENANSVVDALK	YLGAYLLATLGGNASPSAQDVLK	6.31783	WBGene00016493	C37A2.7	C37A2.7	Concise description: none available Provisional description: none available Detailed description: none available
174560	WBGene00002265	F52H3.7	G5EGB1	50	2.9765	16	7	0.066	23120	3.46021	YYPVPYESGLAGEGLAPGK	LVEPFEPGQTLIVK	23	9	0.084	23662	4.86011	YYPVPYESGLAGEGLAPGK	LVEPFEPGQTLIVK	4.16016	WBGene00002265	lec-2	F52H3.7a	Concise description: lec-2 encodes a 'tandem repeat' type galectin (beta-galactosyl-binding lectin) containing two, tandemly arranged carbohydrate recognition domains; by homology, LEC-2 may play roles in cell adhesion and aggregation, proliferation, or programmed cell death. Provisional description: lec-2 encodes a 'tandem repeat' type galectin (beta-galactosyl-binding lectin) containing two, ta…
175455	WBGene00004428	M01F1.2	Q27389	52	2.9697	23	9	0.347	23120	4.97405	LSHEVGWQFQDVVAK	SLHAPSASR	20	9	0.347	23662	4.22619	LSHEVGWQFQDVVAK	AYEGVPAK	4.60012	WBGene00004428	rpl-16	M01F1.2	Concise description: rpl-16 encodes a large ribosomal subunit L13a protein. Provisional description: rpl-16 encodes a large ribosomal subunit L13a protein. Detailed description: none available
174543	WBGene00007463	C08H9.2	B3GWB2	52	2.9681	21	13	0.134	23120	4.54152	LATEHIVCPK	DKEENYVEDTVK	22	16	0.13	23662	4.6488	DSHPNVSVVFPDAK	LATEHIVCPK	4.59516	WBGene00007463	C08H9.2	C08H9.2a	Concise description: none available Provisional description: none available Detailed description: none available
181514	WBGene00007296	C04C11.2	Q17624	8	2.9512								3	3	0.057	23662	0.633928	VGAPEISAASPWR	KPIIINAVK	0.316964	WBGene00007296	arrd-25	C04C11.2	Concise description: none available Provisional description: none available Detailed description: none available
178089	WBGene00003415	F58B3.5	D3YT55	40	2.9363	9	5	0.259	23120	1.94637	GGAAAAPVDDTIDVGR	QVPKPVVSCTPTPTSTPASGIITEAPK	10	6	0.095	23662	2.11309	GGAAAAPVDDTIDVGR	VISQLIAQNLK	2.02973	WBGene00003415	mars-1	F58B3.5a	Concise description: mrs-1 encodes a predicted cytoplasmic methionyl-tRNA synthetase (MetRS), a class I aminoacyl-tRNA synthetase that catalyzes the attachment of methionine to its cognate tRNA and is thus required for protein biosynthesis; MRS-1 is essential for embryogenesis and required also for a normal rate of postembryonic growth. Provisional description: mrs-1 encodes a predicted cytoplasm…
176718	WBGene00006728	ZK1010.1	P49632	72	2.9234	38	10	0.5	23120	8.21799	IQDKEGIPPDQQR	ESTLHLVLR	42	10	0.5	23662	8.87499	IQDKEGIPPDQQR	TLSDYNIQK	8.54649	WBGene00006728	ubq-2	ZK1010.1	Concise description: ubq-2 encodes a bifunctional protein that contains two domains; an N-terminal ubiquitin peptide, and a C-terminal large ribosomal subunit protein L40 peptide. Provisional description: ubq-2 encodes a bifunctional protein that contains two domains; an N-terminal ubiquitin peptide, and a C-terminal large ribosomal subunit protein L40 peptide. Detailed description: none available
174401	WBGene00000240	K08F8.4	Q9XYQ5	9	2.9192								3	3	0.055	23662	0.633928	INDIDQFANR	VLVQDWNTK	0.316964	WBGene00000240	pah-1	K08F8.4a	Concise description: pah-1 encodes a biochemically active phenylalanine-4-hydroxylase orthologous to human PAH (OMIM:261600, mutated in phenylketonuria); recombinant PAH-1 has hydroxylase activity on phenylalanine and tryptophan substrates in vitro; pah-1 is expressed in seam cells, tail hypodermal cells, and ventral hypodermis, with stronger posterior than anterior expression; PAH-1 might help p…
173224	WBGene00006936	Y87G2A.5	Q9U1Q4	48	2.9161	19	10	0.128	23120	4.109	GISLNDLQAQLLGGNLDEK	EQTVEAAEPVDQTPTGQR	11	8	0.104	23662	2.3244	GISLNDLQAQLLGGNLDEK	EQTVEAAEPVDQTPTGQR	3.2167	WBGene00006936	vars-2	Y87G2A.5	Concise description: vrs-2 encodes a predicted cytoplasmic valyl-tRNA synthetase (ValRS), a class I aminoacyl-tRNA synthetase that catalyzes the attachment of valine to its cognate tRNA and is thus required for protein biosynthesis; in C. elegans, VRS-2 activity is required for embryonic and germline development. Provisional description: vrs-2 encodes a predicted cytoplasmic valyl-tRNA synthetase…
172944	WBGene00009122	F25H2.11	Q93573	63	2.9137	28	11	0.735	23120	6.05536	EGEIVLAGSNPSAEEGAEDDGSDEHVER	AAEGAENGQVAIIEYR	30	11	0.735	23662	6.33928	EGEIVLAGSNPSAEEGAEDDGSDEHVER	AAEGAENGQVAIIEYR	6.19732	WBGene00009122	tct-1	F25H2.11	Concise description: none available Provisional description: none available Detailed description: none available
173309	WBGene00004489	Y105E8A.16	Q8WQA8	65	2.9092	29	5	0.436	23120	6.27163	LTLTSQNVKPLEK	LINLHAPAEVLR	22	5	0.436	23662	4.6488	LTLTSQNVKPLEK	LINLHAPAEVLR	5.46021	WBGene00004489	rps-20	Y105E8A.16	Concise description: rps-20 encodes a small ribosomal subunit S20 protein. Provisional description: rps-20 encodes a small ribosomal subunit S20 protein. Detailed description: none available
179541	WBGene00007385	C06H2.1	Q17763	62	2.8996	23	7	0.497	23120	4.97405	IPDPCNIGLNETPEIENR	GVSGTFQSAVSQLPADLPK	23	7	0.497	23662	4.86011	IPDPCNIGLNETPEIENR	GVSGTFQSAVSQLPADLPK	4.91708	WBGene00007385	atp-5	C06H2.1	Concise description: none available Provisional description: none available Detailed description: none available
176007	WBGene00004450	F37C12.4	P49181	63	2.8959	26	7	0.51	23120	5.62284	SGPGIEGLAVGLNK	SGPGIEGLAVGLNK	28	9	0.519	23662	5.91666	MSGPGIEGLAVGLNK	SGPGIEGLAVGLNK	5.76975	WBGene00004450	rpl-36	F37C12.4	Concise description: rpl-36 encodes a large ribosomal subunit L36 protein; by homology, RPL-36 is predicted to function in protein biosynthesis; in C. elegans, RPL-36 activity is required for embryonic and germline development and normal postembryonic growth rates. Provisional description: rpl-36 encodes a large ribosomal subunit L36 protein; by homology, RPL-36 is predicted to function in protei…
172939	WBGene00009119	F25H2.5	Q93576	63	2.8891	26	8	0.765	23120	5.62284	SMLGATNPLASAPGTIR	NICHGSDAVDSANR	28	6	0.588	23662	5.91666	SMLGATNPLASAPGTIR	NICHGSDAVDSANR	5.76975	WBGene00009119	ndk-1	F25H2.5	Concise description: none available Provisional description: none available Detailed description: none available
175796	WBGene00004435	B0336.10	P48158	60	2.8818	25	8	0.564	23120	5.40657	LPSAGVGDMFVCSVK	ISLGLPVGAVMNCADNTGAK	29	8	0.564	23662	6.12797	LPSAGVGDMFVCSVK	ISLGLPVGAVMNCADNTGAK	5.76727	WBGene00004435	rpl-23	B0336.10	Concise description: rpl-23 encodes a large ribosomal subunit L23 protein. Provisional description: rpl-23 encodes a large ribosomal subunit L23 protein. Detailed description: none available
180718	WBGene00000207	F02E8.1	Q19126	58	2.8729	25	10	0.328	23120	5.40657	AHAASTQAAAATDDAPNFFQK	LINSEVDKEFSDR	21	10	0.328	23662	4.43749	AHAASTQAAAATDDAPNFFQK	LINSEVDKEFSDR	4.92203	WBGene00000207	asb-2	F02E8.1	Concise description: asb-2 encodes the B subunit of the membrane-bound F0 proton channel portion of ATP synthase (mitochondrial respiratory chain [MRC] complex V) that is closely similar to its paralog ASB-1; RNAi experiments indicate that asb-2 activity is required for larval development as well as for normal body morphology, lifespan, and growth rate. Provisional description: asb-2 encodes the …
176858	WBGene00004493	T07A9.11	Q1XFY9	62	2.8531	23	6	0.466	23120	4.97405	GFALVYDTIDFAK	QMVVEVIHPGRPTVPK	17	6	0.466	23662	3.59226	QMVVEVIHPGRPTVPK	GFALVYDTIDFAK	4.28315	WBGene00004493	rps-24	T07A9.11	Concise description: rps-24 encodes a small ribosomal subunit S24 protein; by homology, RPS-24 is predicted to function in protein biosynthesis; in C. elegans, RPS-24 activity is required for germline development and the overall health of the animal. Provisional description: rps-24 encodes a small ribosomal subunit S24 protein; by homology, RPS-24 is predicted to function in protein biosynthesis;…
177295	WBGene00006586	W03F8.1	O44572	33	2.8495	3	2	0.139	23120	0.648789	IIPLPDLDNEDDLEAVYDEIR	LEEASR	5	4	0.216	23662	1.05655	IIPLPDLDNEDDLEAVYDEIR	FVKPTLK	0.852669	WBGene00006586	tni-4	W03F8.1	Concise description: tni-4 encodes one of the four elegans troponin I proteins; tni-4 is required for the normal development of the pharynx during embryonic development; TNI-4 interacts only with the pharyngeal troponin C; tni-4 is expressed exclusively in the pharyngeal muscles. Provisional description: tni-4 encodes one of the four elegans troponin I proteins; tni-4 is required for the normal d…
173818	WBGene00018271	F41C3.5	F41C3.5	32	2.8359	4	4	0.1	23120	0.865052	FAYGHGLIDEK	EEIKDLPGLDFEPNFK	4	3	0.079	23662	0.845237	FAYGHGLIDEK	EEIKDLPGLDFEPNFK	0.855144	WBGene00018271	F41C3.5	F41C3.5	Concise description: F41C3.5 encodes a serine carboxypeptidase that is related to human cathepsin A (CTSA, OMIM:256540, mutations are associated with galactosialidosis: beta-galactosidase and alpha-neuraminidase deficiency); microarray experiments have shown that F41C3.5 mRNA levels are reduced in a lin-14 loss-of-function mutant background, suggesting that F41C3.5 expression is positively regula…
176471	WBGene00004798	F43D9.4	Q20363	65	2.828	28	8	0.736	23120	6.05536	DVDLAHIHTVINK	HSMLNNFNNIVPQQLNEVENTAQK	26	7	0.591	23662	5.49404	DVDLAHIHTVINK	HSMLNNFNNIVPQQLNEVENTAQK	5.7747	WBGene00004798	sip-1	F43D9.4	Concise description: sip-1 encodes a member of the small heat shock family of proteins; loss of sip-1 function via antisense or large-scale RNAi experiments results in embryonic lethality and in a small but reproducible reduction in lifespan in otherwise long-lived animals, respectively, suggesting that sip-1 plays a role in embryonic development as well as regulation of adult lifespan; in additi…
172805	WBGene00004488	T05F1.3	O18650	64	2.8261	31	8	0.479	23120	6.70415	GVAPNHFQTSAGNCLR	DVDQHEATK	28	9	0.534	23662	5.91666	GVAPNHFQTSAGNCLR	DVDQHEATK	6.31041	WBGene00004488	rps-19	T05F1.3	Concise description: rps-19 encodes a small ribosomal subunit S19 protein, orthologous to human RPS19 (OMIM:603474, mutated in Diamond-Blackfan anemia). Provisional description: rps-19 encodes a small ribosomal subunit S19 protein, orthologous to human RPS19 (OMIM:603474, mutated in Diamond-Blackfan anemia). Detailed description: none available
181370	WBGene00008205	C49F5.1	O17680	56	2.8202	23	12	0.355	23120	4.97405	DGEDVGAGDQGIMFGYATDETEETMPLTLILSHK	IGFTDSSIGFDHK	22	8	0.206	23662	4.6488	FLFTSESVSEGHPDK	IGFTDSSIGFDHK	4.81142	WBGene00008205	sams-1	C49F5.1	Concise description: sams-1 encodes an S-adenosyl methionine synthetase; by homology, SAMS-1 is predicted to function as a methyl-group donor in many biochemical reactions; sams-1 expression levels are negatively regulated by dietary restriction (as seen in eat-2 mutant animals), suggesting that increased lifespan due to dietary restriction is due, in part, to reducing the activity of key metabol…
178342	WBGene00004430	Y45F10D.12	O45946	67	2.8108	32	10	0.516	23120	6.92042	ILAAGGEIITLDQLALK	ISVAALHVTEGAR	32	10	0.516	23662	6.7619	ILAAGGEIITLDQLALK	ISVAALHVTEGAR	6.84116	WBGene00004430	rpl-18	Y45F10D.12	Concise description: rpl-18 encodes a large ribosomal subunit L18 protein. Provisional description: rpl-18 encodes a large ribosomal subunit L18 protein. Detailed description: none available
173319	WBGene00002978	Y105E8B.1	K8FDX2	70	2.7847	24	12	0.434	23120	5.19031	ANFLETQVDEAK	KLAMVEADLER	31	12	0.41	23662	6.55059	ANFLETQVDEAK	KLAMVEADLER	5.87045	WBGene00002978	lev-11	Y105E8B.1a	Concise description: lev-11 encodes tropomyosin, an actin-binding contractile structural protein orthologous to human TROPOMYOSIN 1 (TPM1; OMIM:191010), which when mutated leads to familial hypertrophic cardiomyopathy; LEV-11 is required for embryonic development, normal body morphology, and locomotion; expressed as multiple tissue-specific isoforms generated by alternative mRNA splicing and prom…
174554	WBGene00011273	R53.4	R53.4	33	2.7736	4	2	0.137	23120	0.865052	TPSAFYNEFMR	LGDLPAWMAR	3	2	0.137	23662	0.633928	TPSAFYNEFMR	LGDLPAWMAR	0.74949	WBGene00011273	R53.4	R53.4	Concise description: none available Provisional description: none available Detailed description: none available
172433	WBGene00003964	H06O01.1	G5ED07	49	2.7706	17	11	0.244	23120	3.67647	FTGGDENVVIGFFESESK	MDATANDVPPMFEVR	16	8	0.193	23662	3.38095	FTGGDENVVIGFFESESK	MDATANDVPPMFEVR	3.52871	WBGene00003964	pdi-3	H06O01.1	Concise description: pdi-3 encodes a protein disulfide isomerase (PDI) required for normal cuticle collagen deposition and, subliminally, for maintenance of normal body shape; PDI-3 has both PDI and calcium-dependent transglutaminase activity in vitro, crosslinking proteins through a gamma-glutamyl epsilon-lysine dual residue; PDI-3 is homologous to the human PDI ERp60, as well as a homolog in th…
173873	WBGene00004434	C27A2.2	P52819	63	2.7702	26	8	0.477	23120	5.62284	IEDLEAFLNEK	TGHLAANNVK	29	8	0.523	23662	6.12797	YFHINDGEDAGSDHE	IEDLEAFLNEK	5.8754	WBGene00004434	rpl-22	C27A2.2a	Concise description: rpl-22 encodes a large ribosomal subunit L22 protein; by homology, RPL-22 is predicted to function in protein biosynthesis; in C. elegans, RPL-22 activity is broadly required for embryonic and germline development, as well as normal body coloration, morphology, and postembryonic growth rates. Provisional description: rpl-22 encodes a large ribosomal subunit L22 protein; by ho…
176338	WBGene00010130	F55H2.2	P34462	37	2.7614	7	2	0.113	23120	1.51384	ALEGPGPGEDAAHSENNPPR	LKEQEAAQK	4	2	0.113	23662	0.845237	ALEGPGPGEDAAHSENNPPR	LKEQEAAQK	1.17954	WBGene00010130	vha-14	F55H2.2	Concise description: vha-14 encodes an ortholog of subunit D of the cytoplasmic (V1) domain of vacuolar proton-translocating ATPase (V-ATPase); VHA-14 is a predicted cytosolic rotor (stalk) component. Provisional description: vha-14 encodes an ortholog of subunit D of the cytoplasmic (V1) domain of vacuolar proton-translocating ATPase (V-ATPase); VHA-14 is a predicted cytosolic rotor (stalk) comp…
175772	WBGene00018963	F56D2.1	P98080	52	2.7558	16	9	0.227	23120	3.46021	ASAALESELNAIGAK	MVLSAVGGGVSNVSSLADK	21	11	0.242	23662	4.43749	ASAALESELNAIGAK	QLSELEAQIQK	3.94885	WBGene00018963	ucr-1	F56D2.1	Concise description: none available Provisional description: none available Detailed description: none available
178117	WBGene00002363	F38H4.9	G5EGK8	42	2.7482	9	5	0.226	23120	1.94637	IQEVPHEGPMCDLLWSDPDDR	CGNQAAMVELDDDLK	9	6	0.277	23662	1.90178	CGNQAAMVELDDDLK	IQEVPHEGPMCDLLWSDPDDR	1.92407	WBGene00002363	let-92	F38H4.9	Concise description: let-92 encodes a homolog of PP2AC, the catalytic subunit of protein phosphatase 2A (PP2A); let-92 was identified genetically in screens for essential genes on chromosome IV; LET-92 may regulate a number of signal transduction pathways as it is required for embryogenesis, larval development, Ras-mediated vulval development, and axonal guidance in the DD and VD neurons; let-92 …
175573	WBGene00011110	R07E5.2	Q21824	45	2.7384	13	5	0.204	23120	2.81142	HTTCNDLPVGR	GLFLIDPSGTVR	14	6	0.248	23662	2.95833	GLFLIDPSGTVR	HTTCNDLPVGR	2.88488	WBGene00011110	prdx-3	R07E5.2	Concise description: prdx-3 encodes one of two C. elegans typical 2-Cys peroxiredoxins, peroxidase enzymes that reduce hydrogen peroxide and contribute to the oxidative-stress response of multicellular organisms. Provisional description: prdx-3 encodes one of two C. elegans typical 2-Cys peroxiredoxins, peroxidase enzymes that reduce hydrogen peroxide and contribute to the oxidative-stress respon…
174800	WBGene00000114	F13D12.4	Q7JMI1	41	2.7215	10	8	0.155	23120	2.16263	VNAGWKPDTDIGPLISK	AWLPELVEK	6	5	0.099	23662	1.26786	VNAGWKPDTDIGPLISK	GSFLGDLNFYGK	1.71524	WBGene00000114	alh-8	F13D12.4a	Concise description: alh-8 is orthologous to the human gene METHYLMALONATE-SEMIALDEHYDE DEHYDROGENASE (ALDH6A1; OMIM:603178), which when mutated leads to MMSDH deficiency. Provisional description: alh-8 is orthologous to the human gene METHYLMALONATE-SEMIALDEHYDE DEHYDROGENASE (ALDH6A1; OMIM:603178), which when mutated leads to MMSDH deficiency. Detailed description: none available
171934	WBGene00001501	D1037.3	Q9TYS3	32	2.7177	3	2	0.153	23120	0.648789	VVLQDIQKPENDEWGTALK	YLDEQVK	4	2	0.153	23662	0.845237	VVLQDIQKPENDEWGTALK	YLDEQVK	0.747013	WBGene00001501	ftn-2	D1037.3	Concise description: ftn-2 encodes one of two C. elegans ferritin heavy chain homologs; loss of ftn-2 activity via deletion mutation results in slightly lower brood sizes and, under iron stress conditions, slightly faster growth from the L4 to adult stage of development, and slightly reduced lifespan; an ftn-2::gfp reporter fusion is expressed in diverse tissues, including the pharynx, intestine,…
171854	WBGene00022114	Y71F9AL.9	Y71F9AL.9	53	2.6927	14	6	0.22	23120	3.02768	AAPAPTVAAPASSSVTK	TETAAPETTQSAPAPAK	15	7	0.318	23662	3.16964	QSNASQFDTSTILK	SAAAPKPVVSAPAPADPLSTAFK	3.09866	WBGene00022114	Y71F9AL.9	Y71F9AL.9	Concise description: none available Provisional description: none available Detailed description: none available
174690	WBGene00000472	F33A8.3	O62213	44	2.686	11	3	0.168	23120	2.37889	GLEAASVTGPDGGPVQGSK	NDVAEQPADKPVK	9	3	0.173	23662	1.90178	GLEAASVTGPDGGPVQGSK	MAEKNDVAEQPADKPVK	2.14033	WBGene00000472	cey-1	F33A8.3	Concise description: cey-1 encodes a protein with a cold-shock/Y-box domain that is expressed in early embryonic blastomeres (at the 15-cell stage, i.e., pre-gastrulation), but is normally repressed in early germline blastomeres by PIE-1. Provisional description: cey-1 encodes a protein with a cold-shock/Y-box domain that is expressed in early embryonic blastomeres (at the 15-cell stage, i.e., pr…
173205	WBGene00012344	W08E3.3	E2JL06	43	2.679	7	6	0.187	23120	1.51384	VPAFLNVTDIAGLVK	LLDMPEDER	7	4	0.119	23662	1.47916	VADLIELGDEAK	EQGVTSNLDK	1.4965	WBGene00012344	tag-210	W08E3.3a	Concise description: none available Provisional description: none available Detailed description: none available
178279	WBGene00004424	JC8.3	P61866	59	2.6761	22	8	0.594	23120	4.75779	CVGGEVGATSALAPK	IDVVPSAASLIVK	23	9	0.636	23662	4.86011	CVGGEVGATSALAPK	IDVVPSAASLIVK	4.80895	WBGene00004424	rpl-12	JC8.3a	Concise description: rpl-12 encodes a large ribosomal subunit L12 protein required in mass RNAi assays for embryonic viability, fertility, normally rapid growth, and general health; the rpl-12 transcription unit has a nonsense transcript that is up-regulated in vivo by smg[-] mutations, indicating that rpl-12 is a natural substrate for SMG-mediated nonsense suppresssion; several other natural mRN…
172061	WBGene00004479	D1007.6	O01869	65	2.6671	23	8	0.51	23120	4.97405	THPNIEGVSNLEVIK	LIYEYLFNEGVTVAK	24	8	0.51	23662	5.07142	THPNIEGVSNLEVIK	LIYEYLFNEGVTVAK	5.02273	WBGene00004479	rps-10	D1007.6	Concise description: rps-10 encodes a small (40S) ribosomal subunit S10 protein; loss of rps-10 activity in adult animals extends lifespan. Provisional description: rps-10 encodes a small (40S) ribosomal subunit S10 protein; loss of rps-10 activity in adult animals extends lifespan. Detailed description: none available
172693	WBGene00004484	F36A2.6	Q9XVP0	67	2.6539	31	9	0.49	23120	6.70415	ATQDDAHLAELKK	DMIILPELVGGVIGIYNGK	26	9	0.497	23662	5.49404	MATQDDAHLAELK	MATQDDAHLAELKK	6.0991	WBGene00004484	rps-15	F36A2.6	Concise description: rps-15 encodes a small ribosomal subunit S15 protein. Provisional description: rps-15 encodes a small ribosomal subunit S15 protein. Detailed description: none available
24104384	WBGene00004432	E04A4.8	O44480	64	2.6517	25	10	0.406	23120	5.40657	ALGETLNEYVVVGR	DTTVAGAVTQCYR	27	10	0.4	23662	5.70535	ALGETLNEYVVVGR	DTTVAGAVTQCYR	5.55596	WBGene00004432	rpl-20	E04A4.8	Concise description: rpl-20 encodes a large ribosomal subunit L18a protein. Provisional description: rpl-20 encodes a large ribosomal subunit L18a protein. Detailed description: none available
180872	WBGene00002023	C09B8.6	Q86GU1	53	2.6313	12	5	0.239	23120	2.59516	FDVANYKPEEVTVK	SPLIKDESDGK	11	5	0.239	23662	2.3244	FDVANYKPEEVTVK	SPLIKDESDGK	2.45978	WBGene00002023	hsp-25	C09B8.6a	Concise description: hsp-25 encodes a member of the small heat shock family of proteins; HSP-25 is expressed throughout development and in vitro, exhibits chaperone activity; HSP-25 localizes to: 1) dense bodies and M lines in body wall muscle, 2) the lining of the pharynx, and 3) to cell-cell junctions in the spermathecal wall; consistent with a role in myofibril organization, HSP-25 binds vincu…
172918	WBGene00009113	F25D7.4	A9UJN7	26	2.6257	15	7	0.092	23120	3.24394	ALAGGNEAEVEK	NPGFVAHVR								1.62197	WBGene00009113	F25D7.4	F25D7.4	Concise description: none available Provisional description: none available Detailed description: none available
172201	WBGene00004431	C09D4.5	O02639	65	2.6098	23	9	0.374	23120	4.97405	VWLDPNEVSEISGANSR	QLADQAQAR	29	9	0.369	23662	6.12797	VWLDPNEVSEISGANSR	QLADQAQAR	5.55101	WBGene00004431	rpl-19	C09D4.5	Concise description: rpl-19 encodes a large ribosomal subunit L19 protein. Provisional description: rpl-19 encodes a large ribosomal subunit L19 protein. Detailed description: none available
178402	WBGene00001558	Y57G11C.10	G5EBR1	25	2.6085								5	4	0.074	23662	1.05655	NQPYAPAVEK	CGDEIVR	0.528275	WBGene00001558	gdi-1	Y57G11C.10a	Concise description: gdi-1 encodes a member of the Rab GDP dissociation inhibitor (GDI) family with high similarity to Drosophila Gdi; expressed around the pharyngeal, vulval, and tail regions. Provisional description: gdi-1 encodes a member of the Rab GDP dissociation inhibitor (GDI) family with high similarity to Drosophila Gdi; expressed around the pharyngeal, vulval, and tail regions. Detaile…
174207	WBGene00018395	F43E2.7	Q8I7N5	16	2.6084								7	3	0.12	23662	1.47916	LALSSLSLPLTVTR	TLIQLGHEPFPLSTGK	0.73958	WBGene00018395	mtch-1	F43E2.7a	Concise description: none available Provisional description: none available Detailed description: none available
172313	WBGene00004486	T08B2.10	O01692	70	2.6039	28	7	0.608	23120	6.05536	DNYMPEISTVDPSQLTSIK	AAGFNLPNVTVEDQGK	32	8	0.654	23662	6.7619	DNYMPEISTVDPSQLTSIK	AAGFNLPNVTVEDQGK	6.40863	WBGene00004486	rps-17	T08B2.10	Concise description: rps-17 encodes a small ribosomal subunit S17 protein. Provisional description: rps-17 encodes a small ribosomal subunit S17 protein. Detailed description: none available
172195	WBGene00000230	F27C1.7	Q7JNG1	56	2.6037	15	8	0.355	23120	3.24394	LDQISTDLNNVR	ETGNFLGLLAENGR	15	8	0.355	23662	3.16964	LESVVSSFESIMR	LDQISTDLNNVR	3.20679	WBGene00000230	atp-3	F27C1.7a	Concise description: atp-3 encodes the C. elegans homolog of the ATP5O subunit of mitochondrial ATP synthase (complex V); as part of the ATP synthase complex, ATP-3 controls respiration and regulates growth rate and body size, aging, and rates of behaviors such as pharyngeal pumping, defecation, and locomotion; loss of atp-3 function during larval development indicates that respiratory rates esta…
177366	WBGene00006780	B0350.2	G5ECZ1	46	2.6015	11	7	0.045	23120	2.37889	ETAEEGFTNEDGSVVVSK	SASLAAALLELDPR	9	9	0.016	23662	1.90178	ETAEEGFTNEDGSVVVSK	VSVQAQPVPQEMVTR	2.14033	WBGene00006780	unc-44	B0350.2a	Concise description: The unc-44 gene encodes an ankyrin-like protein required for proper sex myoblast and axonal guidance during development. Provisional description: Sex myoblasts, which migrate during larval hermaphrodite development, require a gonad-dependent repellent cue to properly reach their precise final positions: this repulsive signal requires the activity of unc-14, unc-33, unc-44, an…
178538	WBGene00004496	F56E10.4	Q9TXP0	69	2.5997	26	5	0.41	23120	5.62284	PLAVDLLHPEPQR	LVQHPNSYFMDVK	26	4	0.41	23662	5.49404	LVQHPNSYFMDVK	PLAVDLLHPEPQR	5.55844	WBGene00004496	rps-27	F56E10.4	Concise description: rps-27 encodes a small ribosomal subunit S27 protein. Provisional description: rps-27 encodes a small ribosomal subunit S27 protein. Detailed description: none available
179999	WBGene00001423	T01C3.7	Q22053	58	2.5977	19	8	0.273	23120	4.109	ANCIDSTAEPEAVFAGEVNK	IVALNAQNFLR	22	8	0.273	23662	4.6488	ANCIDSTAEPEAVFAGEVNK	IVALNAQNFLR	4.3789	WBGene00001423	fib-1	T01C3.7	Concise description: fib-1 encodes the C. elegans ortholog of Saccharomyces cerevisiae Nop1p, an essential component of the U3 SnoRNP; FIB-1 localizes to the nucleolus. Provisional description: fib-1 encodes the C. elegans ortholog of Saccharomyces cerevisiae Nop1p, an essential component of the U3 SnoRNP; FIB-1 localizes to the nucleolus. Detailed description: none available
175668	WBGene00016140	C26E6.4	Q10578	12	2.5967	4	3	0.028	23120	0.865052	DCQISHGATQFLR	DGAPMPMMPNEAR								0.432526	WBGene00016140	rpb-2	C26E6.4	Concise description: none available Provisional description: none available Detailed description: none available
178778	WBGene00004422	T22F3.4	Q94300	63	2.5875	22	6	0.281	23120	4.75779	VLEQLTGQTPVFSK	YDGIILPPKPK	26	7	0.316	23662	5.49404	VLEQLTGQTPVFSK	YDGIILPPKPK	5.12591	WBGene00004422	rpl-11.1	T22F3.4	Concise description: rpl-11.1 encodes a large ribosomal subunit L11 protein. Provisional description: This gene encodes a protein predicted by Eisenberg and coworkers, with 52 percentage accuracy, to be mitochondrial. Proteins localized to a given organelle by experiments tend to share a characteristic phylogenetic distribution of their homologs, called a phylogenetic profile. For instance, mitoc…
181124	WBGene00006764	ZK721.2	Q9GYF1	53	2.584	8	4	0.145	23120	1.7301	TISLPNVDSIDDK	FVKPSLK	10	5	0.215	23662	2.11309	MSEEAGEDAQR	IYNDLWAR	1.92159	WBGene00006764	unc-27	ZK721.2	Concise description: unc-27 encodes a troponin I isoform; unc-27 is required for coordinated motility and normal muscle morphology; structural analyses indicate that unc-27 is required for proper sarcomeric organization; unc-27/troponin I interacts with the body wall and pharynx types of troponin C; expression studies show that unc-27 is expressed in body wall, vulval and anal muscles. Provisiona…
181311	WBGene00007942	C34F6.8	O17643	19	2.5832	9	4	0.097	23120	1.94637	CATITPDEAR	TIEAEAAHGTVTR								0.973185	WBGene00007942	idh-2	C34F6.8	Concise description: idh-2 encodes a predicted mitochondrial isocitrate dehydrogenase; by homology, IDH-2 is predicted to catalyze the formation of alpha-ketoglutarate from isocitrate as part of the citric acid cycle. Provisional description: idh-2 encodes a predicted mitochondrial isocitrate dehydrogenase; by homology, IDH-2 is predicted to catalyze the formation of alpha-ketoglutarate from isoc…
173811	WBGene00006626	F10G7.2	Q19328	43	2.5604	4	3	0.044	23120	0.865052	LQTLVNDYNTTEEVAR	QVAVTDIAPGALR	9	7	0.095	23662	1.90178	IGDQNIAEGLISR	QVAVTDIAPGALR	1.38342	WBGene00006626	tsn-1	F10G7.2	Concise description: tsn-1 encodes the C. elegans ortholog of Tudor-SN (tudor staphylococcal nuclease); TSN-1 is a component of the RNA-induced silencing complex (RISC) and its activity is required for proper function of the let-7 miRNA in vivo; TSN-1 is found in both the nucleus and the cytosol. Provisional description: tsn-1 encodes the C. elegans ortholog of Tudor-SN (tudor staphylococcal nucl…
175027	WBGene00001884	ZK131.4	P62784	58	2.557	15	5	0.505	23120	3.24394	DNIQGITKPAIR	TVTAMDVVYALK	14	5	0.505	23662	2.95833	DNIQGITKPAIR	TVTAMDVVYALK	3.10114	WBGene00001884	his-10	ZK131.4	Concise description: his-10 encodes an H4 histone. Provisional description: his-10 encodes an H4 histone. Detailed description: none available
180646	WBGene00006928	F59D8.2	P18947	54	2.5346	7	5	0.027	23120	1.51384	STNPCYQQLAVR	LNQVNVVSEYK	7	4	0.027	23662	1.47916	STNPCYQQLAVR	LEAPQQMYWNTELR	1.4965	WBGene00006928	vit-4	F59D8.2	Concise description: none available Provisional description: none available Detailed description: none available
174964	WBGene00002264	W09H1.6	O45904	51	2.5271	14	6	0.221	23120	3.02768	NSLAANEWGNEER	IVLNSFSNGEWGK	16	10	0.394	23662	3.38095	NSLAANEWGNEER	IVLNSFSNGEWGK	3.20431	WBGene00002264	lec-1	W09H1.6a	Concise description: lec-1 encodes a tandem repeat-type galectin in which each galectin domain is homologous to typical vertebrate 14-kDa-type galectins; the two sugar binding sites have distinct sugar binding properties in vitro and lec-1 is expressed most abundantly in the adult cuticle. Provisional description: lec-1 encodes a tandem repeat-type galectin in which each galectin domain is homolo…
174379	WBGene00004440	F28C6.7	Q19869	64	2.5269	19	8	0.55	23120	4.109	TDDEVVVMR	VNPFVSSDSGK	18	6	0.541	23662	3.80357	TDDEVVVMR	VNPFVSSDSGK	3.95628	WBGene00004440	rpl-26	F28C6.7a	Concise description: rpl-26 encodes a large ribosomal subunit L26 protein; by homology, RPL-26 is predicted to function in protein biosynthesis; in C. elegans, RPL-26 activity is required for embryonic and germline development and normal rates of postembryonic growth. Provisional description: rpl-26 encodes a large ribosomal subunit L26 protein; by homology, RPL-26 is predicted to function in pro…
178365	WBGene00009926	F52B11.3	Q9XUE5	14	2.5137	4	3	0.051	23120	0.865052	VFECSSHETTAFVR	NCIVSDEDTFSR								0.432526	WBGene00009926	noah-2	F52B11.3	Concise description: noah-2 encodes a PAN and ZP domain-containing protein that is related to the Drosophila extracellular matrix component NompA (no-mechanoreceptor-potential A); loss of noah-2 function via RNAi indicates that NOAH-2 activity is essential for molting; in addition, NOAH-2 appears to be required for embryonic and larval development, reproduction, coordinated locomotion, and the ov…
176097	WBGene00004449	ZK652.4	P34662	66	2.494	20	7	0.423	23120	4.32526	LLTVINQTQK	LTAHELSLR	29	7	0.374	23662	6.12797	LLTVINQTQK	LTAHELSLR	5.22661	WBGene00004449	rpl-35	ZK652.4	Concise description: rpl-35 encodes a large ribosomal subunit L35 protein. Provisional description: rpl-35 encodes a large ribosomal subunit L35 protein. Detailed description: none available
171986	WBGene00000779	F28H1.2	O01542	48	2.487	12	5	0.225	23120	2.59516	LSGENISTSGER	KLSGENISTSGER	12	6	0.232	23662	2.53571	LSGENISTSGER	KLSGENISTSGER	2.56543	WBGene00000779	cpn-3	F28H1.2	Concise description: cpn-3 encodes a calponin homolog, most closely related to its paralog CPN-4 in C. elegans; CPN-3 is more similar to the calponin paralogs transgelin (SM22 alpha) or neuronal protein NP25 than to calponin per se. Provisional description: cpn-3 encodes a calponin homolog, most closely related to its paralog CPN-4 in C. elegans; CPN-3 is more similar to the calponin paralogs tra…
179209	WBGene00000219	F21F8.7	O01530	52	2.4805	16	8	0.249	23120	3.46021	SWTIQYGSGDAAGILGQDTVR	TVDVISDTGTSFLGGPQSVVDGLAK	14	7	0.249	23662	2.95833	TVDVISDTGTSFLGGPQSVVDGLAK	SWTIQYGSGDAAGILGQDTVR	3.20927	WBGene00000219	asp-6	F21F8.7	Concise description: aspartic protease. Provisional description: aspartic protease. Detailed description: none available
179690	WBGene00011015	R04F11.2	R04F11.2	39	2.4718	5	3	0.308	23120	1.08131	YLMQVVNIPFEEGVK	QFGVADLYKED	3	1	0.14	23662	0.633928	YLMQVVNIPFEEGVK	NA	0.857619	WBGene00011015	R04F11.2	R04F11.2	Concise description: none available Provisional description: none available Detailed description: none available
176477	WBGene00012860	Y45F3A.3	Q9XWZ2	10	2.4656								3	3	0.053	23662	0.633928	ASDSAIQGETR	IVDSDGNALEGSR	0.316964	WBGene00012860	acdh-11	Y45F3A.3a	Concise description: none available Provisional description: none available Detailed description: none available
174059	WBGene00019061	F58F12.1	F58F12.1	57	2.4535	15	6	0.423	23120	3.24394	LTFASPDTAVFSNAVVK	AAAAPAANANPEELR	17	6	0.423	23662	3.59226	LTFASPDTAVFSNAVVK	AAAAPAANANPEELR	3.4181	WBGene00019061	F58F12.1	F58F12.1	Concise description: F58F12.1 encodes the delta subunit of the soluble, catalytic F1 portion of ATP synthase (mitochondrial respiratory chain [MRC] complex V); RNAi experiments indicate that F58F12.1 activity is essential for embryonic and larval development, as well as for reproduction and normal rates of growth and development. Provisional description: F58F12.1 encodes the delta subunit of the …
172617	WBGene00004439	F52B5.6	Q20647	60	2.4512	21	7	0.404	23120	4.54152	LASDYDALDVANK	VNTLITPLQQK	18	6	0.404	23662	3.80357	LASDYDALDVANK	VNTLITPLQQK	4.17255	WBGene00004439	rpl-25.2	F52B5.6	Concise description: rpl-25.2 encodes a large ribosomal subunit L23a protein. Provisional description: rpl-25.2 encodes a large ribosomal subunit L23a protein. Detailed description: none available
180345	WBGene00012615	Y38H6C.1	Q9XX57	68	2.4272	10	5	0.622	23120	2.16263	AKEEMTAAGLSPESIEGILK	DAATSLAIITK	9	5	0.622	23662	1.90178	AKEEMTAAGLSPESIEGILK	DAATSLAIITK	2.0322	WBGene00012615	dct-16	Y38H6C.1a	Concise description: none available Provisional description: none available Detailed description: none available
179872	WBGene00009973	F53C11.3	F53C11.3	16	2.4178								5	4	0.125	23662	1.05655	RLDVLEK	AGVENMTK	0.528275	WBGene00009973	F53C11.3	F53C11.3	Concise description: none available Provisional description: none available Detailed description: none available
177392	WBGene00022235	Y73B6BL.6	Q8MXR6	39	2.4164	5	3	0.172	23120	1.08131	NNSGFDYQQAQGAR	IFVGGISPEVNNEDLSSHFTQYGEVAQAQVK	7	4	0.198	23662	1.47916	NNSGFDYQQAQGAR	IFVGGISPEVNNEDLSSHFTQYGEVAQAQVK	1.28024	WBGene00022235	sqd-1	Y73B6BL.6a	Concise description: none available Provisional description: none available Detailed description: none available
178788	WBGene00003025	T27C4.4	Q86S28	18	2.4039	4	3	0.054	23120	0.865052	DTYPCQVDDSSGLQTK	NKPSAGGGSSTTTDEK								0.432526	WBGene00003025	lin-40	T27C4.4a	Concise description: lin-40 encodes a homolog of mammalian MTA (Metastasis-Associated) proteins, components of the multisubunit, ATP-dependent NuRD complex that mediates transcriptional repression via nucleosome remodeling and histone deacetylation; lin-40 is an essential gene required for proper vulval cell fate specification and morphogenesis; in addition, lin-40 acts with its paralog, egl-27, …
178188	WBGene00004492	F28D1.7	Q19877	65	2.4029	23	6	0.322	23120	4.97405	SGHAVGDIPGVR	VANTSLIALFK	21	6	0.322	23662	4.43749	VANTSLIALFK	SGHAVGDIPGVR	4.70577	WBGene00004492	rps-23	F28D1.7	Concise description: rps-23 encodes a small ribosomal subunit S23 protein; by homology, RPS-23 is predicted to function in protein biosynthesis; in C. elegans, RPS-23 activity is required for germline development, vulval morphogenesis, and the overall health of the animal. Provisional description: rps-23 encodes a small ribosomal subunit S23 protein; by homology, RPS-23 is predicted to function i…
177971	WBGene00012015	T25B9.9	T25B9.9	19	2.3999								8	6	0.159	23662	1.69047	IIGAHSIEEMCK	GIMFVGCGVSGGEEGAR	0.845235	WBGene00012015	T25B9.9	T25B9.9	Concise description: none available Provisional description: none available Detailed description: none available
174807	WBGene00009688	F44E5.1	F44E5.1	46	2.3836	11	3	0.372	23120	2.37889	AIANVAAAAPAHH	GIWQSIVQTK	6	2	0.295	23662	1.26786	AIANVAAAAPAHH	GIWQSIVQTK	1.82337	WBGene00009688	F44E5.1	F44E5.1	Concise description: none available Provisional description: none available Detailed description: none available
179522	WBGene00008920	F17C11.9	P54412	61	2.3463	17	6	0.208	23120	3.67647	EVLGEVSLASSVAQFNQAK	PAAAAAQPEDDEPKEEK	20	9	0.271	23662	4.22619	EVLGEVSLASSVAQFNQAK	PAAAAAQPEDDEPKEEK	3.95133	WBGene00008920	eef-1G	F17C11.9a	Concise description: none available Provisional description: none available Detailed description: none available
176071	WBGene00004420	R13A5.8	Q95Y90	62	2.3405	19	7	0.392	23120	4.109	LIESNDTVVFPEGVTFTVK	FLDGIYVSEK	19	8	0.487	23662	4.01488	LIESNDTVVFPEGVTFTVK	FLDGIYVSEK	4.06194	WBGene00004420	rpl-9	R13A5.8	Concise description: rpl-9 encodes a large ribosomal subunit L9 protein that affects fertility and embryonic viability. Provisional description: rpl-9 encodes a large ribosomal subunit L9 protein that affects fertility and embryonic viability. Detailed description: none available
178854	WBGene00018811	F54D11.1	Q22993	47	2.3348	12	8	0.231	23120	2.59516	TGFVNVQTENMTPR	DCIQHIPDTEK	7	5	0.169	23662	1.47916	SVSNVQVVSPCQK	TGFVNVQTENMTPR	2.03716	WBGene00018811	pmt-2	F54D11.1	Concise description: pmt-2 encodes an experimentally validated N-methyltransferase required for phosphocholine biosynthesis and viability; PMT-2 lacks known mammalian orthologs, but has orthologs in parasitic nematodes, fish, amphibians, echinoderms, plants, alveolata, and bacteria; PMT-2 is distantly paralogous to PMT-1; PMT-2 has a single C-terminal methyltransferase domain, unlike plant enzyme…
172818	WBGene00004426	C04F12.4	Q9XVE9	62	2.3084	17	6	0.319	23120	3.67647	LAAIVNVIDGNR	VQIDGPSSDVTR	20	7	0.37	23662	4.22619	LAAIVNVIDGNR	VQIDGPSSDVTR	3.95133	WBGene00004426	rpl-14	C04F12.4	Concise description: rpl-14 encodes a large ribosomal subunit L14 protein. Provisional description: rpl-14 encodes a large ribosomal subunit L14 protein. Detailed description: none available
172252	WBGene00016333	C32F10.8	C32F10.8	19	2.3033								7	4	0.095	23662	1.47916	VLCIINPGNPTGQALSR	MELASFHSVSK	0.73958	WBGene00016333	C32F10.8	C32F10.8a	Concise description: none available Provisional description: none available Detailed description: none available
173512	WBGene00006924	F56D12.5	H2KYR1	56	2.3033	16	6	0.238	23120	3.46021	GNWGDQKDELAGETENIAPEGAESTEPEVPR	SVKPAQPVKPAAAPVAATK	14	5	0.204	23662	2.95833	GNWGDQKDELAGETENIAPEGAESTEPEVPR	QEVSFEDGQDTR	3.20927	WBGene00006924	vig-1	F56D12.5a	Concise description: vig-1 encodes a predicted RNA-binding protein orthologous to Drosophila VIG (Vasa Intronic Gene); vig-1 activity is required for proper function of the let-7 miRNA in vivo and thus, for regulating the transition from late larval to adult cell fates; VIG-1 is a component of the 250 kDa RNA-induced silencing complex (RISC) complex and co-immunoprecipates with both TSN-1, the C.…
174603	WBGene00001683	T09F3.3	P04970	41	2.2599								26	9	0.255	23662	5.49404	VINDNFGIIEGLMTTVHAVTATQK	GAGQNIIPASTGAAK	2.74702	WBGene00001683	gpd-1	T09F3.3	Concise description: gpd-1 encodes one of four C. elegans glyceraldehyde-3-phosphate dehydrogenases (GAPDHs); by homology, GPD-1 is predicted to reversibly catalyze the oxidation and phosphorylation of glyceraldehyde-3-phosphate to 1,3-diphosphoglycerate during glycolysis; GPD-1 is required for embryogenesis, normal body morphology, and gonad development; in C. elegans, GPD-1 and GPD-4 constitute…
174367	WBGene00002065	F54C9.1	Q20751	59	2.2578	17	6	0.416	23120	3.67647	KLEDICPSTHNMDVPVVK	DAYEKDEGSVLVQVVSAIGEEAILGWK	15	5	0.416	23662	3.16964	KLEDICPSTHNMDVPVVK	DAYEKDEGSVLVQVVSAIGEEAILGWK	3.42306	WBGene00002065	iff-2	F54C9.1	Concise description: none available Provisional description: none available Detailed description: none available
179025	WBGene00020275	T05H4.12	O16517	51	2.2177	9	3	0.256	23120	1.94637	NAGNLANSDPAVK	LPTNFEAAK	11	5	0.333	23662	2.3244	NAGNLANSDPAVK	LPTNFEAAK	2.13538	WBGene00020275	atp-4	T05H4.12	Concise description: none available Provisional description: none available Detailed description: none available
176059	WBGene00001503	H14A12.2	Q8ITZ0	20	2.2155								7	6	0.176	23662	1.47916	AIEILGGELGSK	THTQDAVPLTLGQEFSAYVTQLDNSIAR	0.73958	WBGene00001503	fum-1	H14A12.2a	Concise description: fum-1 is orthologous to human FUMARASE (FH; OMIM:136850), which when mutated leads to fumarase deficiency; FUM-1A and FUM-1B are predicted to be mitochondrial. Provisional description: This gene encodes, by alternative splicing, two proteins predicted by Eisenberg and coworkers, with 52 percentage accuracy, to be mitochondrial. Proteins localized to a given organelle by exper…
171646	WBGene00022042	Y65B4BR.5	V6CKR1	66	2.1986	19	8	0.549	23120	4.109	IEDLTQHAQMSAIENLKPTR	TVEEDENEDVEEDSTGIEEK	19	6	0.451	23662	4.01488	IEDLTQHAQMSAIENLKPTR	TVEEDENEDVEEDSTGIEEK	4.06194	WBGene00022042	icd-2	Y65B4BR.5a	Concise description: none available Provisional description: none available Detailed description: none available
179981	WBGene00004336	W06A7.3	G5ECZ2	40	2.1485	3	2	0.04	23120	0.648789	NVQNIIDEK	QAVDSGDEIGR	4	3	0.059	23662	0.845237	SAPVAAEEK	NVQNIIDEK	0.747013	WBGene00004336	ret-1	W06A7.3a	Concise description: none available Provisional description: none available Detailed description: none available
173342	WBGene00004495	F39B2.6	O45499	59	2.1473	13	4	0.333	23120	2.81142	DIGDASAYTQYALPK	NIVEAAAVR	16	4	0.333	23662	3.38095	DIGDASAYTQYALPK	NIVEAAAVR	3.09619	WBGene00004495	rps-26	F39B2.6	Concise description: rps-26 encodes a small ribosomal subunit S26 protein; by homology, RPS-26 is predicted to function in protein biosynthesis; in C. elegans, RPS-26 activity is required for embryonic, larval, and germline development, as well as normal locomotion and body morphology. Provisional description: rps-26 encodes a small ribosomal subunit S26 protein; by homology, RPS-26 is predicted …
175940	WBGene00015734	C13B9.3	copd-1	37	2.121	2	2	0.039	23120	0.432526	QQGQSIAPVQK	ESVNLAQIR	2	2	0.039	23662	0.422619	ESVNLAQIR	QHTFVETDSVR	0.427573	WBGene00015734	C13B9.3	C13B9.3	Concise description: C13B9.3 encodes a delta subunit of the coatomer (COPI) complex; in mass RNAi assays, C13B9.3 is required for fertility and general health. Provisional description: C13B9.3 encodes a delta subunit of the coatomer (COPI) complex; in mass RNAi assays, C13B9.3 is required for fertility and general health. Detailed description: none available
173160	WBGene00001427	Y18D10A.19	Q9U2Q8	45	2.0777	7	2	0.25	23120	1.51384	GWDQGVAQMSVGEK	QILVEGDNVTKPK	6	2	0.25	23662	1.26786	GWDQGVAQMSVGEK	QILVEGDNVTKPK	1.39085	WBGene00001427	fkb-2	Y18D10A.19	Concise description: fkb-2 encodes a peptidylprolyl cis/trans isomerase homologous to the mammalian FK506 immunosuppressant-binding protein 1A (FKBP1A, OMIM:186945, mutations associated with myocardial noncompaction); by homology, FKB-2 could function in a number of processes including protein folding, signal transduction, and regulation of muscle contraction; however, the precise role of FKB-2 i…
176011	WBGene00004490	F37C12.11	P49197	60	2.0698	7	4	0.443	23120	1.51384	MQNDAGQTVELYVPR	MGESDDAILR	8	5	0.455	23662	1.69047	MQNDAGQTVELYVPR	MGESDDAILR	1.60215	WBGene00004490	rps-21	F37C12.11	Concise description: rps-21 encodes a small ribosomal subunit S21 protein; by homology, RPS-21 is predicted to function in protein biosynthesis; in C. elegans, RPS-21 activity is required for embryonic and germline development, as well as the overall health of the animal. Provisional description: rps-21 encodes a small ribosomal subunit S21 protein; by homology, RPS-21 is predicted to function in…
172942	WBGene00003926	F25H2.9	Q95008	32	2.061	2	2	0.093	23120	0.432526	SIGAASDGAEQNLK	LMVNDAIEK	2	1	0.056	23662	0.422619	SIGAASDGAEQNLK	NA	0.427573	WBGene00003926	pas-5	F25H2.9	Concise description: pas-5 encodes a proteasome alpha-type five subunit of the core 20S proteasome subcomplex; loss of pas-5 activity via RNAi results in a variety of defects including embryonic and larval lethality, sterility, and abnormal locomotion; loss of pas-5 activity also results in activation of SKN-1, a transcription factor required in adult worms for the acute response to oxidative str…
175538	WBGene00003073	R74.1	Q09996	26	2.0561								9	5	0.035	23662	1.90178	EEALEK	EFMYWYPIDMR	0.95089	WBGene00003073	lars-1	R74.1	Concise description: lrs-1 encodes a predicted cytoplasmic leucyl-tRNA synthetase (LeuRS), a class I aminoacyl-tRNA synthetase that catalyzes the attachment of leucine to its cognate tRNA and is thus required for protein biosynthesis; LRS-1 activity is required for embryonic, larval, and germline development, as well as normal body morphology and rates of postembryonic growth. Provisional descrip…
177365	WBGene00004494	K02B2.5	P52821	62	2.0523	13	4	0.274	23120	2.81142	DKLNNMVLFDQATYDK	LNNMVLFDQATYDK	15	4	0.274	23662	3.16964	DKLNNMVLFDQATYDK	LNNMVLFDQATYDK	2.99053	WBGene00004494	rps-25	K02B2.5	Concise description: rps-25 encodes a small ribosomal subunit S25 protein. Provisional description: rps-25 encodes a small ribosomal subunit S25 protein. Detailed description: none available
178078	WBGene00004755	F12F6.6	Q19371	18	2.0371								4	4	0.034	23662	0.845237	NALVPQEDSYTK	TENVMPLIYPR	0.422619	WBGene00004755	sec-24.1	F12F6.6	Concise description: sec-24.1 encodes one of two C. elegans Sec24 homologs; in Saccharomyces cerevisiae, Sec24 is a member of the Sec24-Sec23 subunit of the COPII coat complex, assembly of which is essential for the first step of secretory protein transport from the endoplasmic reticulum (ER) to the Golgi; by homology with Sec24, SEC-24.1 is predicted to facilitate vesicle cargo selection, and li…
171865	WBGene00022122	Y71F9AM.6	Q95XT5	38	2.0268	4	4	0.222	23120	0.865052	NSQEDDDLTIGASPDAGLAFHFVQPSDANVVR	YLIGFQNK	4	4	0.222	23662	0.845237	NSQEDDDLTIGASPDAGLAFHFVQPSDANVVR	YLIGFQNK	0.855144	WBGene00022122	trap-1	Y71F9AM.6	Concise description: none available Provisional description: none available Detailed description: none available
177097	WBGene00021088	W08E12.7	W08E12.7	47	2.0122	7	4	0.123	23120	1.51384	EGAIAGDLCDLGDK	SLRPDTENTTITK	7	4	0.153	23662	1.47916	SLRPDTENTTITK	EGAIAGDLCDLGDK	1.4965	WBGene00021088	W08E12.7	W08E12.7	Concise description: none available Provisional description: none available Detailed description: none available
177636	WBGene00017075	D2096.8	Q19007	48	2.0018	7	5	0.177	23120	1.51384	TYLLGFDPDAEAPLQFDGPHVIR	AVGDTIEWEDGK	8	5	0.174	23662	1.69047	TYLLGFDPDAEAPLQFDGPHVIR	AVGDTIEWEDGK	1.60215	WBGene00017075	nap-1	D2096.8	Concise description: D2096.8 encodes a protein related in sequence to the conserved NAP (Nucleosome Assembly Protein) family of proteins involved in chromatin remodeling; loss of D2096.8 activity in wild-type and various mutant backgrounds suggests that, in C. elegans, the product of D2096.8 is required for proper transcriptional regulation that affects a number of biological processes including …
175467	WBGene00008117	C46F11.2	Q86DB5	16	2.0007								4	3	0.074	23662	0.845237	FLLTPVAIAAGR	GILTLK	0.422619	WBGene00008117	gsr-1	C46F11.2a	Concise description: gsr-1 encodes a protein orthologous to human MITOCHONDRIAL GLUTATHIONE REDUCTASE (GSR; OMIM:138300); GSR deficiency has been associated with hemolytic anemia. Provisional description: gsr-1 encodes a protein orthologous to human MITOCHONDRIAL GLUTATHIONE REDUCTASE (GSR; OMIM:138300); GSR deficiency has been associated with hemolytic anemia. Detailed description: none available
180111	WBGene00000776	T03E6.7	H9G333	54	1.9982	11	3	0.095	23120	2.37889	DNHGVDTEESYPYK	DTHLVTDVK	10	4	0.157	23662	2.11309	DNHGVDTEESYPYK	TVGADDKGYVDTPEGDEEQLK	2.24599	WBGene00000776	cpl-1	T03E6.7a	Concise description: cpl-1 encodes a member of the cathepsin L-like cysteine protease family required for embryonic viability and normal growth; expressed in eggshells and throughout early embryos, accumulates in intestinal cells during late embryogenesis, and expressed in the cuticle, gonad, and pharynx later in development. Provisional description: cpl-1 encodes a member of the cathepsin L-like…
179302	WBGene00000215	T18H9.2	Q86NE1	39	1.9874	4	3	0.091	23120	0.865052	QYCNIYDVGTQR	AYVSAIADAVGATWR	3	2	0.063	23662	0.633928	AYVSAIADAVGATWR	QYCNIYDVGTQR	0.74949	WBGene00000215	asp-2	T18H9.2a	Concise description: asp-2 encodes aspartic protease. Provisional description: asp-2 encodes aspartic protease. Detailed description: none available
172216	WBGene00006919	F46F11.5	P91303	63	1.942	14	6	0.302	23120	3.02768	ASQTQGIQQLLAAEK	AFEQQYLGTK	13	6	0.254	23662	2.74702	MASQTQGIQQLLAAEK	AFEQQYLGTK	2.88735	WBGene00006919	vha-10	F46F11.5	Concise description: vha-10 encodes an ortholog of subunit G of the cytoplasmic (V1) domain of vacuolar proton-translocating ATPase (V-ATPase); VHA-10 is required for necrosis, since vha-10(RNAi) suppresses necrotic neurodegeneration and thapsigargin-induced cell death; VHA-10 is a predicted cytosolic stator (stalk) component. Provisional description: vha-10 encodes an ortholog of subunit G of th…
173976	WBGene00002053	F10C1.2	Q19289	63	1.9384	9	6	0.105	23120	1.94637	EVQNLNYQLTDDQR	SDLDDETIGR	10	7	0.161	23662	2.11309	ISQWTNAIADAQSEVEMLR	EVQNLNYQLTDDQR	2.02973	WBGene00002053	ifb-1	F10C1.2a	Concise description: ifb-1 (also known as vab-21) encodes two isoforms of an essential intermediate filament protein that is coexpressed with the essential IF proteins IFA-1, IFA-2, and IFA-3, along with IFA-4; IFB-1 is required for embryonic development and epidermal morphogenesis; IFB-1 forms heteropolymeric intermediate filaments in vitro with an equimolar mixture of IFA-1, IFA-2, or IFA-3, an…
176707	WBGene00012553	Y37D8A.14	P55954	35	1.9335	3	2	0.126	23120	0.648789	ALSELHDYDVIPDPK	QVEPVLK	2	2	0.075	23662	0.422619	QVEPVLK	LAIAGR	0.535704	WBGene00012553	cco-2	Y37D8A.14	Concise description: cco-2 encodes the C. elegans ortholog of the cytochrome c oxidase (COX) subunit Va (COX Va); loss of cco-2 activity via RNAi results in a shortened life span, reduced fertility, and defects in mitochondrial respiratory chain function. Provisional description: cco-2 encodes the C. elegans ortholog of the cytochrome c oxidase (COX) subunit Va (COX Va); loss of cco-2 activity vi…
177469	WBGene00015551	C06G3.5	C06G3.5	14	1.9146								3	3	0.109	23662	0.633928	SCFLPEDEKAELVK	VLEAFEIFLPVIR	0.316964	WBGene00015551	C06G3.5	C06G3.5a	Concise description: C06G3.5 is orthologous to human ADENOSINE DEAMINASE (ADA; OMIM:102700), which when mutated leads to severe combined immunodeficiency. Provisional description: C06G3.5 is orthologous to human ADENOSINE DEAMINASE (ADA; OMIM:102700), which when mutated leads to severe combined immunodeficiency. Detailed description: none available
172979	WBGene00015021	B0205.6	B0205.6	20	1.8655	5	3	0.075	23120	1.08131	IDLMSISAHK	VPIDVNEMK								0.540655	WBGene00015021	B0205.6	B0205.6	Concise description: none available Provisional description: none available Detailed description: none available
176376	WBGene00001155	T05G5.6	P34559	47	1.8393	3	3	0.194	23120	0.648789	ALNALCAQLMTELADALEVLDTDK	FGQPEINIGTIPGAGGTQR	7	4	0.219	23662	1.47916	ALNALCAQLMTELADALEVLDTDK	IFPADQVVGEAVK	1.06397	WBGene00001155	ech-6	T05G5.6	Concise description: none available Provisional description: none available Detailed description: none available
180974	WBGene00015168	B0403.4	Q11067	41	1.8275	5	2	0.091	23120	1.08131	YFAPGSDVSDAQDYDGGR	DGALPAEDDIDLSDIDLDKTEL	3	2	0.091	23662	0.633928	YFAPGSDVSDAQDYDGGR	DGALPAEDDIDLSDIDLDKTEL	0.857619	WBGene00015168	tag-320	B0403.4	Concise description: none available Provisional description: none available Detailed description: none available
178620	WBGene00004266	C39F7.4	I7FW32	40	1.787	3	2	0.107	23120	0.648789	MGPVQGAGGAPGVR	QWLQEIDR	2	1	0.068	23662	0.422619	MGPVQGAGGAPGVR	NA	0.535704	WBGene00004266	rab-1	C39F7.4	Concise description: rab-1 encodes an ortholog of the small Ras-like GTPase Rab1; by homology, RAB-1 is predicted to play a role in intracellular vesicle trafficking, and consistent with this broad role, large-scale RNAi screens indicate that rab-1 activity is required for fertility, movement, and survival; in yeast two-hybrid assays, RAB-1 interacts with TIR-1, a C. elegans SARM ortholog that is…
171768	WBGene00004014	Y37E3.9	Q9BKU4	54	1.7831	4	3	0.142	23120	0.865052	AFASAGDGLVELR	IAAVTTAEGDAQAAK	6	4	0.175	23662	1.26786	IAAVTTAEGDAQAAK	AFASAGDGLVELR	1.06646	WBGene00004014	phb-1	Y37E3.9	Concise description: phb-1 encodes the C. elegans ortholog of prohibitin PHB1; loss of phb-1 activity via RNAi indicates that phb-1 function is required for mitochondrial organization and morphology and for embryonic, germline, and somatic gonad development; PHB-1, along with prohibitin subunit PHB-2, forms a macromolecular complex that localizes to mitochondrial membranes; PHB-1 and PHB-2 are de…
175315	WBGene00021248	Y22D7AL.10	Y22D7AL.10	49	1.6272	3	2	0.213	23120	0.648789	VLLPEYGGTK	GELVALTVKPGDR	3	2	0.167	23662	0.633928	VLLPEYGGTK	TFKPLYDR	0.641359	WBGene00021248	Y22D7AL.10	Y22D7AL.10	Concise description: none available Provisional description: none available Detailed description: none available
173510	WBGene00000112	F56D12.1	Q86N72	18	1.589	3	3	0.076	23120	0.648789	STGSIVGQQPFGGSR	LNASTMLGQGK								0.324394	WBGene00000112	alh-6	F56D12.1a	Concise description: alh-6 is orthologous to the human gene ALDEHYDE DEHYDROGENASE 4 FAMILY, MEMBER A1 (ALDH4A1; OMIM:606811), which when mutated leads to hyperprolinemia type II. Provisional description: alh-6 is orthologous to the human gene ALDEHYDE DEHYDROGENASE 4 FAMILY, MEMBER A1 (ALDH4A1; OMIM:606811), which when mutated leads to hyperprolinemia type II. Detailed description: none available
175915	WBGene00003214	C05D11.11	P50432	46	1.5808	5	4	0.093	23120	1.08131	SFTETNEPFKK	GVDTLYDLEEK	3	3	0.055	23662	0.633928	SFTETNEPFKK	YSEGYPGAR	0.857619	WBGene00003214	mel-32	C05D11.11a	Concise description: mel-32 encodes a serine hydroxymethyltransferase; by homology, MEL-32 is predicted to catalyze the biochemical reaction that converts serine to glycine and in the process transfers a methyl group to tetrahydrofolate and, thus, into the one-carbon pool used for a variety of cellular metabolic processes; in C. elegans MEL-32 activity is required maternally for embryonic develop…
176284	WBGene00001386	F02A9.3	P34383	57	1.564	6	4	0.258	23120	1.29758	EVPQNFDDIPAEYK	GLIPAEVAEHLK	5	3	0.198	23662	1.05655	EVPQNFDDIPAEYK	GLIPAEVAEHLK	1.17707	WBGene00001386	far-2	F02A9.3	Concise description: far-2 encodes a protein similar to a class of secreted fatty acid and retinol-binding proteins expressed in parasitic nematodes and secreted in the surrounding tissues of the host; expressed in body wall muscle and vulval cells of adult hermaphrodites, and transcript levels progressively increase during development. Provisional description: far-2 encodes a protein similar to …
174645	WBGene00010896	M28.5	M28.5	44	1.5579	4	2	0.188	23120	0.865052	LMDLVQQAMNYK	AFPLADTNLSQK	4	1	0.094	23662	0.845237	AFPLADTNLSQK	LQPRLK	0.855144	WBGene00010896	M28.5	M28.5	Concise description: none available Provisional description: none available Detailed description: none available
175441	WBGene00010303	F59A2.3	Q21018	47	1.5283	3	2	0.055	23120	0.648789	YIDPDLHDLLFVR	IDPDLHDLLFVR	2	1	0.055	23662	0.422619	YIDPDLHDLLFVR	NA	0.535704	WBGene00010303	cri-3	F59A2.3	Concise description: none available Provisional description: none available Detailed description: none available
174161	WBGene00002183	T02G5.8	Q22100	27	1.4773								5	3	0.128	23662	1.05655	GEIPYGGFQVIDGIVK	DGLTDAYDK	0.528275	WBGene00002183	kat-1	T02G5.8	Concise description: kat-1 encodes a predicted 3-ketoacyl-coA thiolase, a conserved enzyme in the mitochondrial fatty acid beta-oxidation pathway; kat-1 acts synergistically with tub-1 and together with the Bardet-Biedl syndrome protein BBS1 ortholog, bbs-1, to regulate lipid accumulation; genetic interaction studies of kat-1 with che-2, osm-5 and daf-6, genes that are required for ciliary struct…
173161	WBGene00003989	Y18D10A.20	Q9XW16	58	1.4627	6	3	0.326	23120	1.29758	GADIEGVHYVVPR	TFVALFNDVTQVPAK	7	3	0.326	23662	1.47916	GADIEGVHYVVPR	TFVALFNDVTQVPAK	1.38837	WBGene00003989	pfn-1	Y18D10A.20	Concise description: none available Provisional description: none available Detailed description: none available
179958	WBGene00008262	C53A5.1	O17694	50	1.438	3	2	0.209	23120	0.648789	GAAVVVASPNAPIPATDLHPR	LADKEYFK	5	1	0.151	23662	1.05655	GAAVVVASPNAPIPATDLHPR	NA	0.852669	WBGene00008262	ril-1	C53A5.1	Concise description: none available Provisional description: none available Detailed description: none available
173227	WBGene00013597	Y87G2A.8	Q7K707	29	1.3948	5	4	0.092	23120	1.08131	SSGMSPESIAK	FAAYFQQGDMESNGK								0.540655	WBGene00013597	gpi-1	Y87G2A.8a	Concise description: gpi-1 encodes two isoforms of a putative glucose 6-phosphate isomerase orthologous to human GPI (OMIM:172400, mutated in chronic hemolytic anemia); gpi-1 is required both for embryonic viability and (paradoxically) for normally short lifespan; gpi-1 is expressed in neurons and intestine. Provisional description: gpi-1 encodes two isoforms of a putative glucose 6-phosphate iso…
180279	WBGene00012812	Y43F8B.1	Y43F8B.1	34	1.3812	5	4	0.074	23120	1.08131	VAQAQNQAQVNQAAQDQAK	TIVAQPASYHK								0.540655	WBGene00012812	Y43F8B.1	Y43F8B.1a	Concise description: none available Provisional description: none available Detailed description: none available
171829	WBGene00000788	F32B5.8	G5EGP8	35	1.3203	4	3	0.092	23120	0.865052	AFETYAGGIYK	GPIACGIAATK								0.432526	WBGene00000788	cpz-1	F32B5.8	Concise description: cpz-1 encodes a homolog of cathepsin z-like cysteine protease cyclically expressed in hypodermal cells throughout development (along with adult gonad and pharynx) and required for normal molting; CPZ-1 protein is present in cuticle regions shortly before their degradation during ecydsis, and this expression pattern is conserved in Onchocerca volvulus; cpz-1(ok497) and cpz-1(R…
177952	WBGene00011182	R09H10.5	R09H10.5	38	1.0904								4	3	0.024	23662	0.845237	QYTLVTFDDTNIK	STGSCYLQAR	0.422619	WBGene00011182	R09H10.5	R09H10.5	Concise description: none available Provisional description: none available Detailed description: none available
175443	WBGene00003795	F59A2.1	Q86G90	38	1.0221								4	3	0.037	23662	0.845237	TGEEGEQTMFCNR	IEHQTGVTQLR	0.422619	WBGene00003795	npp-9	F59A2.1a	Concise description: none available Provisional description: none available Detailed description: none available
