# Supplementary material for: The LRR-TM protein PAN-1 interacts with MYRF to promote its nuclear translocation in synaptic remodeling
Source: eLife. 2021 May 5;10:e67628. doi: 10.7554/eLife.67628 (PMC8099431; doi:10.7554/eLife.67628)
Supplement: Supplementary file 2. [file elife-67628-supp2.xlsx]

## Sheet: MYRF-2(F21A10.2).final
Summary table of putative preys identified from MYRF-2 Immunoprecipitation Mass Spectrometry (IP-MS) datasets with detailed information
Number of interacting preys: 277
Top 5% wd score threshold: 13
Top 10% wd score threshold: 27
Number of baits: 72 baits
Bait name: MYRF-2
MS type: HCD-FTMS
Database-searching software: pFind 3.1 (http://pfind.ict.ac.cn/)
WD score: A scoring metrix for identifying high-confidence candidate interacting proteins (HCIPs) http://besra.hms.harvard.edu/ipmsmsdbs/cgi-bin/tutorial.cgi; Revised
This is a summary table in which the rows are the unique proteins (preys) identified from all IP-MS/MS experiments and the columns represent the statistics of this bait used for IPMS experimens.
Prey: NCBI Entrez gene ID.
WB_ID: Wormbase gene ID.
Tx_ID: stable transcript ID following the principles of parsimony to minimize confusion due to isoforms.
UP_ID: UniPort ID.
Freq(obs): the observed frequency of specific interacting protein across all baits.
Spec_rep1: the spectral count for specific interacting protein from particular bait's IP-MS/MS experiment(technical replicate 1).
Peptide_rep1: the peptide count for specific interacting protein from particular bait's IP-MS/MS experiment (technical replicate 1).
Coverage_rep1: the coverage for specific interacting protein from particular bait's IP-MS/MS experiment (technical replicate 1).
Spec_sum_rep1: the Total Spectral Count (TSC) for particular bait's IP-MS/MS experiment (technical replicate 1).
Norm_spec_rep1: the normalized spectral count (Spec_rep1/Spec_sum_rep1*5,000) for specific interacting protein from particular bait's IP-MS/MS experiment (technical replicate 1).
Pep_seq1_rep1: the amino acid sequence of the first peptide identified from particular bait's IP-MS/MS experiment (technical replicate 1).
Pep_seq2_rep1: the amino acid sequence of the second peptide identified from particular bait's IP-MS/MS experiment (technical replicate 1).
Spec_rep2: the spectral count for specific interacting protein from particular bait's IP-MS/MS experiment (technical replicate 2).
Peptide_rep2: the peptide count for specific interacting protein from particular bait's IP-MS/MS experiment (technical replicate 2).
Coverage_rep2: the coverage for specific interacting protein from particular bait's IP-MS/MS experiment (technical replicate 2).
Spec_sum_rep2: the Total Spectral Count (TSC) for particular bait's IP-MS/MS experiment(technical replicate 2).
Norm_spec_rep2: the normalized spectral count (Spec_rep2/Spec_sum_rep2*5,000) for specific interacting protein from particular bait's IP-MS/MS experiment (technical replicate 2).
Pep_seq1_rep2: the amino acid sequence of the first peptide identified from particular bait's IP-MS/MS experiment (technical replicate 2).
Pep_seq2_rep2: the amino acid sequence of the second peptide identified from particular bait's IP-MS/MS experiment (technical replicate 2).
Avg_norm_spec: the average of normalized spectral count for specific interacting protein from particular bait's IP-MS/MS experiment (all technical replicates).
Functional descriptions: the last four columns are gene functional descriptions downloaded from ftp://ftp.wormbase.org/pub/wormbase/species/c_elegans/annotation/geneIDs/.
Prey	WB_ID	Tx_ID	UP_ID	Freq(obs)	WD_score	Spec_rep1	Peptide_rep1	Coverage_rep1	Spec_sum_rep1	Norm_spec_rep1	Pep_seq1_rep1	Pep_seq2_rep1	Spec_rep2	Peptide_rep2	Coverage_rep2	Spec_sum_rep2	Norm_spec_rep2	Pep_seq1_rep2	Pep_seq2_rep2	Avg_norm_spec	Functional_descriptions
181357	WBGene00006654	C40H5.5	G5EE86	1	2151.11	23	5	0.147	9543	12.0507	AIVDKEISVVDGKYYHNNCLR	AIVDKEISVVDGK	25	5	0.1	9547	13.0931	AIVDKEISVVDGKYYHNNCLR	AIVDKEISVVDGK	12.5719	WBGene00006654	ttx-3	C40H5.5a	Concise description: ttx-3 encodes a LIM homeodomain protein required for functions of the interneuron AIY, including thermosensory behavior and olfactory learning. Provisional description: Normal animals primarily sense non-noxious thermal gradients by means of the finger amphid neuron AFD, which synapses onto AIY; AIY, in turn, is required to transmit information about excessive cold in thermal…
181229	WBGene00008999	F21A10.2	D9PTN5	3	1688.68	271	88	0.562	9543	141.989	LKDNITEKGAKDALENLQK	LTGDLDQKIDDKVAEISQR	265	87	0.578	9547	138.787	LKDNITEKGAKDALENLQKLR	LKDNITEKGAKDALENLQK	140.388	WBGene00008999	F21A10.2	F21A10.2a	Concise description: none available Provisional description: none available Detailed description: none available
174614	WBGene00004134	F59B10.1	G5EFI7	3	1071.21	110	37	0.323	9543	57.6339	MTGDLDSKIDEKVAEISR	MTGDLDSKIDEKVAEISR	106	37	0.328	9547	55.5148	MTGDLDSKIDEKVAEISR	MTGDLDSKIDEKVAEISR	56.5744	WBGene00004134	pqn-47	F59B10.1	Concise description: pqn-47 encodes a protein with a glutamine/asparagine-rich domain, homologous to human C11orf9 and Drosophila CG3328, that is required for locomotion, vulval development, full body size, cuticular integrity, and general health in mass RNAi assays; pqn-47(cxP5915) homozygotes are sluggish. Provisional description: The protein product of this gene is predicted to contain a gluta…
175596	WBGene00003915	M88.6	Q9U3A0	4	937.044	216	71	0.571	9543	113.172	SDELPKSLSSLALDHNVISKIEAR	GFKEEFNAHKQPVCICADNGIFSTVK	209	64	0.559	9547	109.458	SDELPKSLSSLALDHNVISKIEAR	GFKEEFNAHKQPVCICADNGIFSTVK	111.315	WBGene00003915	pan-1	M88.6a	Concise description: pan-1 encodes a novel predicted transmembrane protein with extracellular leucine-rich repeats; loss of PAN-1 activity via RNAi results in molting defects and arrested L2-sized larvae, indicating that PAN-1 is required for completion of the larval molts; pan-1 expression is enriched in the germline and upregulated in animals mutant for unc-95, which encodes a LIM domain-contai…
187255	WBGene00010731	K10C3.4	K10C3.4	3	208.902	3	2	0.108	9543	1.57183	TAAHLVSMAEKGAEDKLNIVDLKDHLMR	RVPVVEQEQLLK	5	3	0.146	9547	2.61862	RVPVVEQEQLLK	TAAHLVSMAEKGAEDKLNIVDLKDHLMR	2.09523	WBGene00010731	K10C3.4	K10C3.4a	Concise description: none available Provisional description: none available Detailed description: none available
178747	WBGene00002055	F37B4.2	O45168	4	125.994	5	4	0.08	9543	2.61972	EIGLLNDRLADYIEK	REDIEIAYR	3	3	0.096	9547	1.57117	EIGLLNDRLADYIEKVR	IRIVEEDVIR	2.09544	WBGene00002055	ifc-1	F37B4.2	Concise description: ifc-1 encodes a nonessential intermediate filament protein; IFC-1 is predicted to function as a structural component of the cytoskeleton; IFC-1 has no function in RNAi assays. Provisional description: Based on sequence similarity, the C. elegans intermediate filament protein family is comprised of five distinct subfamilies, A, B, C, D, and E. IFC-1, and IFC-2 define the C sub…
180665	WBGene00018538	F47B7.7	F47B7.7	7	74.9188	8	2	0.078	9543	4.19155	SSAPAEEAPKEEKKIPK	SSAPAEEAPKEEK	9	2	0.078	9547	4.71352	SSAPAEEAPKEEKKIPK	SSAPAEEAPKEEK	4.45254	WBGene00018538	F47B7.7	F47B7.7a	Concise description: F47B7.7 encodes a novel protein conserved amongst nematode species. Provisional description: F47B7.7 encodes a novel protein conserved amongst nematode species. Detailed description: none available
180819	WBGene00001006	C25F6.2	G5ECY0	11	60.1949	18	13	0.184	9543	9.431	VGDKILEVDHHSLINTTHENAVNVLK	MSHESSEKAHKAIENVEDYCQTLTR	21	10	0.137	9547	10.9982	VGDKILEVDHHSLINTTHENAVNVLK	STRPNTSVIDLVK	10.2146	WBGene00001006	dlg-1	C25F6.2a	Concise description: dlg-1 encodes a MAGUK protein, orthologous to Drosophila Discs large; DLG-1 is physically located at apical adherens junctions in all epithelia and is required for organization of the embryonic gut epithelium into a coherent tube. Provisional description: Loss of dlg-1 activity differentially affects localisation of proteins normally enriched apically to the zonula adherens. …
181182	WBGene00002067	C43C3.1	Q09501	7	55.5185	7	4	0.089	9543	3.66761	TSNTEIGDADHHHH	IQIETLQGTLPVLPSHSVETIR	3	1	0.028	9547	1.57117	IQIETLQGTLPVLPSHSVETIR	NA	2.61939	WBGene00002067	ifp-1	C43C3.1	Concise description: ifp-1 encodes a nonessential intermediate filament protein; IFP-1 is predicted to function as a structural component of the cytoskeleton; IFP-1 has no obvious function in RNAi assays. Provisional description: Based on sequence similarity, the C. elegans intermediate filament protein family is comprised of five distinct subfamilies, A, B, C, D, and E. IFP-1 is the sole member …
177047	WBGene00022075	Y69A2AR.3	Y69A2AR.3	7	53.4239	5	2	0.145	9543	2.61972	TSTGIEHAEKAR	STGIEHAEKAR	4	2	0.145	9547	2.0949	STGIEHAEKAR	TSTGIEHAEKAR	2.35731	WBGene00022075	Y69A2AR.3	Y69A2AR.3	Concise description: none available Provisional description: none available Detailed description: none available
266835	WBGene00022749	ZK484.3	ZK484.3	12	51.5964	13	7	0.315	9543	6.81128	ASLNEANQQGIKVPSTSSTASASAPAPVKK	KPAPVPVVEK	15	9	0.315	9547	7.85587	ASLNEANQQGIKVPSTSSTASASAPAPVKK	KPAPVPVVEK	7.33357	WBGene00022749	ZK484.3	ZK484.3	Concise description: none available Provisional description: none available Detailed description: none available
180414	WBGene00002056	M6.1	G8JY94	12	46.0118	18	8	0.129	9543	9.431	IKQLTHNEIALKNER	EIGLLNDRLADYIEK	18	10	0.096	9547	9.42705	IKQLTHNEIALKNER	EIGLLNDRLADYIEKVR	9.42902	WBGene00002056	ifc-2	M6.1a	Concise description: ifc-2 encodes three isoforms of an intermediate filament protein dispensable for viability but required for normal movement, growth rate, body size, body shape, and cuticle strength; IFC-2 is present in the cytoplasm of intestinal cells, and at the desmosomes of intestinal and pharyngeal cells. Provisional description: ifc-2 encodes three isoforms of an intermediate filament …
177056	WBGene00022380	Y94H6A.8	Y94H6A.8	8	45.975	4	2	0.267	9543	2.09578	TKIQGWQPGEKPQFD	VGTLVGSDNFGNRYYENNAYFVPR	6	2	0.267	9547	3.14235	TKIQGWQPGEKPQFD	VGTLVGSDNFGNRYYENNAYFVPR	2.61906	WBGene00022380	Y94H6A.8	Y94H6A.8	Concise description: none available Provisional description: none available Detailed description: none available
175840	WBGene00006727	F25B5.4	G8JY83	2	41.7675								22	5	0.113	9547	11.5219	QLEDGRTLSDYNIQKESTLHLVLR	TITLEVEASDTIENVKAK	5.76095	WBGene00006727	ubq-1	F25B5.4a	Concise description: none available Provisional description: none available Detailed description: none available
13190517	WBGene00043097	C02D5.4	C02D5.4	9	39.6616	5	2	0.122	9543	2.61972	IVKNGDPAPAPPAAGTIR	ILPTDPYEKVQQK	6	3	0.122	9547	3.14235	IVKNGDPAPAPPAAGTIR	ILPTDPYEKVQQK	2.88103	WBGene00043097	C02D5.4	C02D5.4	Concise description: none available Provisional description: none available Detailed description: none available
173973	WBGene00002054	F10C1.7	M1Z854	32	35.0056	139	50	0.75	9543	72.8283	LYNSHGIEKASHIQTTVASSR	NSALEREANTLQIQLGEDQRAYESELHKR	147	48	0.671	9547	76.9875	LVESEEGRLVPVEQDHWDSGEVQTR	LYNSHGIEKASHIQTTVASSR	74.9079	WBGene00002054	ifb-2	F10C1.7a	Concise description: ifb-2 encodes a nonessential intermediate filament protein; IFB-2 is predicted to function as a structural component of the cytoskeleton; IFB-2 has no obvious function in RNAi assays. Provisional description: Based on sequence similarity, the C. elegans intermediate filament protein family is comprised of five distinct subfamilies, A, B, C, D, and E. IFB-2, along with IFB-1, …
186951	WBGene00019361	K03E5.2	K03E5.2	13	34.664	15	9	0.668	9543	7.85916	WAVADNAAHDSIVR	NTQTKVEFAEHGAR	10	6	0.396	9547	5.23725	WAVADNAAHDSIVR	NTQTKVEFAEHGAR	6.54821	WBGene00019361	K03E5.2	K03E5.2a	Concise description: none available Provisional description: none available Detailed description: none available
24104769	WBGene00001572	M03A8.4	G4SI07	17	31.0171	24	10	0.262	9543	12.5747	QLRDDNLTHSQREANTHTEPVYQRDPNYNQR	MSEYGSAANLSNFRER	22	9	0.335	9547	11.5219	QLRDDNLTHSQREANTHTEPVYQRDPNYNQR	TMFYSPIGDGTVAADGYELK	12.0483	WBGene00001572	gei-15	M03A8.4	Concise description: none available Provisional description: none available Detailed description: none available
173805	WBGene00001976	T05A7.4	G5EEL9	35	30.347	33	10	0.511	9543	17.2902	SYAEDVAATKPAKTDVATPALAALTGEKKGR	SYAEDVAATKPAKTDVATPALAALTGEKK	29	10	0.511	9547	15.188	SYAEDVAATKPAKTDVATPALAALTGEKKGR	SYAEDVAATKPAKTDVATPALAALTGEK	16.2391	WBGene00001976	hmg-11	T05A7.4	Concise description: none available Provisional description: none available Detailed description: none available
175307	WBGene00022053	Y67D2.3	Q9BKQ9	10	29.9505	5	3	0.244	9543	2.61972	MVAFDESPVYAGVAQK	VAFDESPVYAGVAQK	4	2	0.103	9547	2.0949	MVAFDESPVYAGVAQK	VAFDESPVYAGVAQK	2.35731	WBGene00022053	Y67D2.3	Y67D2.3	Concise description: none available Provisional description: none available Detailed description: none available
187585	WBGene00002057	R04E5.10	Q86DC6	12	28.426	4	3	0.082	9543	2.09578	LINDCDDEKSHLKTEISR	KLEPEITTAIR	10	6	0.148	9547	5.23725	VRSDKKEQLKHLSDLESETAYIKR	LINDCDDEKSHLKTEISR	3.66651	WBGene00002057	ifd-1	R04E5.10a	Concise description: ifd-1 encodes two isoforms of a nonessential intermediate filament protein; IFD-1 is predicted to function as a structural component of the cytoskeleton; IFD-1 has no obvious function in RNAi assays. Provisional description: Based on sequence similarity, the C. elegans intermediate filament protein family is comprised of five distinct subfamilies, A, B, C, D, and E. IFD-1 and…
266853	WBGene00020868	T27F7.3	Q967F1	13	26.8466	7	2	0.422	9543	3.66761	MSIANLNRPADAFEQLETEDGVRQGVCHIR	TITTVQGIGTEYDLKR	8	2	0.422	9547	4.1898	MSIANLNRPADAFEQLETEDGVRQGVCHIR	TITTVQGIGTEYDLKR	3.9287	WBGene00020868	eif-1	T27F7.3	Concise description: none available Provisional description: none available Detailed description: none available
177390	WBGene00001853	Y73B6BL.9	P15796	21	25.298	25	7	0.251	9543	13.0986	MSDVTVAETPAVKTPTKAPK	SDVTVAETPAVKTPTKAPK	24	7	0.251	9547	12.5694	MSDVTVAETPAVKTPTKAPK	SDVTVAETPAVKTPTKAPK	12.834	WBGene00001853	hil-2	Y73B6BL.9a	Concise description: none available Provisional description: none available Detailed description: none available
191734	WBGene00003773	ZK892.2	Q23655	22	25.0119	22	6	0.305	9543	11.5268	MAFKSDVIFEEIKER	IATDKEMVKK	26	8	0.305	9547	13.6168	MAFKSDVIFEEIKER	IATDKEMVKK	12.5718	WBGene00003773	nlt-1	ZK892.2	Concise description: nlt-1 encodes a member of the SCP-2 sterol transfer family. Provisional description: nlt-1 encodes a member of the SCP-2 sterol transfer family. Detailed description: none available
181031	WBGene00016898	C53C9.2	C53C9.2	25	24.8462	32	10	0.297	9543	16.7662	VQCGTNQYASQKGETPIGASR	VTYKKEWETILDKEGEKIIPK	33	9	0.297	9547	17.2829	VQCGTNQYASQKGETPIGASR	VTYKKEWETILDKEGEKIIPK	17.0246	WBGene00016898	C53C9.2	C53C9.2	Concise description: none available Provisional description: none available Detailed description: none available
172687	WBGene00003052	DY3.2	Q21443	46	24.3511	9	5	0.097	9543	4.7155	SFQEKLDDKDAR	VVDVNGEDQDIDYLNRR	13	7	0.155	9547	6.80842	ERQEEAVSEAIHLR	SFQEKLDDKDAR	5.76196	WBGene00003052	lmn-1	DY3.2	Concise description: lmn-1 encodes the sole C. elegans nuclear lamin; lmn-1 is an essential gene that is required for a number of nuclear processes, including chromatin organization, cell cycle progression, chromosome segregation, and nuclear pore complex spacing; LMN-1 is also required for nuclear envelope localization of EMR-1/Emerin during early development; LMN-1 localizes to the nuclear peri…
175028	WBGene00001886	ZK131.6	P09588	48	23.5905	89	31	0.638	9543	46.631	HLQLAVRNDEELNKLLAGVTIAQGGVLPNIQAVLLPK	HLQLAVRNDEELNKLLAGVTIAQGGVLPNIQAVLLPKKTGGDKE	90	29	0.63	9547	47.1352	HLQLAVRNDEELNKLLAGVTIAQGGVLPNIQAVLLPKKTGGDKE	HLQLAVRNDEELNKLLAGVTIAQGGVLPNIQAVLLPK	46.8831	WBGene00001886	his-12	ZK131.6	Concise description: his-12 encodes an H2A histone; his-12 is contained within the histone gene cluster HIS3. Provisional description: his-12 encodes an H2A histone; his-12 is contained within the histone gene cluster HIS3. Detailed description: none available
173279	WBGene00013406	Y63D3A.7	Y63D3A.7	16	23.2078	9	4	0.478	9543	4.7155	VATLEDLSRENVKSTITQLASQK	VATLEDLSRENVK	13	6	0.685	9547	6.80842	VATLEDLSRENVKSTITQLASQK	AFIENDYVGIKK	5.76196	WBGene00013406	Y63D3A.7	Y63D3A.7	Concise description: Y63D3A.7 encodes the C. elegans ortholog of the NDUFA2/B8 subunit of the mitochondrial NADH dehydrogenase (ubiquinone) complex (complex I). Provisional description: Y63D3A.7 encodes the C. elegans ortholog of the NDUFA2/B8 subunit of the mitochondrial NADH dehydrogenase (ubiquinone) complex (complex I). Detailed description: none available
174494	WBGene00010942	M176.3	Q21551	13	20.9525	3	2	0.178	9543	1.57183	KKIFDDTVER	KTAGISAAPVSISGNDLEER	7	5	0.402	9547	3.66607	TAGISAAPVSISGNDLEER	KKIFDDTVER	2.61895	WBGene00010942	chch-3	M176.3	Concise description: none available Provisional description: none available Detailed description: none available
172300	WBGene00020379	T09B4.5	T09B4.5	24	19.9825	19	9	0.15	9543	9.95494	DVVKTIEVADDEDEVTTPSR	TIEVADDEDEVTTPSRLR	18	8	0.15	9547	9.42705	DVVKTIEVADDEDEVTTPSR	TIEVADDEDEVTTPSR	9.69099	WBGene00020379	T09B4.5	T09B4.5a	Concise description: none available Provisional description: none available Detailed description: none available
179534	WBGene00000064	T04C12.5	P10984	58	19.2466	371	88	0.774	9543	194.383	HQGVMVGMGQKDSYVGDEAQSKR	HQGVMVGMGQKDSYVGDEAQSKR	360	91	0.755	9547	188.541	HQGVMVGMGQKDSYVGDEAQSKR	HQGVMVGMGQKDSYVGDEAQSKR	191.462	WBGene00000064	act-2	T04C12.5	Concise description: act-2 encodes an invertebrate actin that may function specifically in the pharynx. Provisional description: The act-2 gene, embedded in the 11-kb gene cluster act-123, encodes an typical invertebrate actin highly similar to ACT-1, ACT-3, and ACT-4; a single mutant allele of act-2 has been isolated on the basis of defective feeding (an Eat phenotype), as part of a double mutan…
175026	WBGene00001889	ZK131.9	P04255	60	18.4665	119	39	0.566	9543	62.3494	HAVSEGTKAVTKYTSSK	VRLILPGELAKHAVSEGTKAVTKYTSSK	120	38	0.697	9547	62.847	HAVSEGTKAVTKYTSSK	EIQTAVRLILPGELAK	62.5982	WBGene00001889	his-15	ZK131.9	Concise description: his-15 encodes an H2B histone. Provisional description: his-15 encodes an H2B histone. Detailed description: none available
180044	WBGene00004452	C06B8.8	O17570	58	18.0307	63	16	0.586	9543	33.0085	TLVVADKDKAEKLKQSLPPGIQVK	VVADKDKAEKLKQSLPPGIQVK	63	16	0.586	9547	32.9947	VVADKDKAEKLKQSLPPGIQVK	TLVVADKDKAEKLKQSLPPGIQVK	33.0016	WBGene00004452	rpl-38	C06B8.8	Concise description: rpl-38 encodes a large ribosomal subunit L38 protein. Provisional description: rpl-38 encodes a large ribosomal subunit L38 protein. Detailed description: none available
179656	WBGene00004138	R07B7.3	Q21793	15	18.0212	4	3	0.08	9543	2.09578	QIITAPVQSQVIR	APVKVVR	4	3	0.08	9547	2.0949	QIITAPVQSQVIR	APVKVVR	2.09534	WBGene00004138	pqn-53	R07B7.3a	Concise description: The protein product of this gene is predicted to contain a glutamine/asparagine (Q/N)-rich ('prion') domain, by the algorithm of Michelitsch and Weissman (as of the WS77 release of WormBase, i.e., in wormpep77). Provisional description: Proteins bearing such domains can sometimes stably exist in at least two distinct physical states, each associated with a different phenotype…
172832	WBGene00000371	F26E4.9	P90849	26	17.5644	22	5	0.356	9543	11.5268	ATEASPEDYGYYPDPLEHATGR	ATEASPEDYGYYPDPLEHATGREK	26	7	0.364	9547	13.6168	ATEASPEDYGYYPDPLEHATGR	ATEASPEDYGYYPDPLEHATGREK	12.5718	WBGene00000371	cco-1	F26E4.9	Concise description: cco-1 encodes the ortholog of the nuclear-encoded cytochrome c oxidase-1 subunit Vb/COX4, a component of the electron transport chain in mitochondria; knock-down of cco-1 via RNA interference in specific tissues like body wall muscle decreases life span, whereas knock-down in the nervous system and intestine increases life-span; the effects of cco-1 on life span indicate that…
172396	WBGene00001682	F08B6.2	G5ECT6	17	17.4361	5	3	0.581	9543	2.61972	FTESQEDPLVNPIDKK	TPITVSAAELRR	9	5	0.79	9547	4.71352	FTESQEDPLVNPIDKK	TPITVSAAELRR	3.66662	WBGene00001682	gpc-2	F08B6.2	Concise description: gpc-2 encodes one of two C. elegans heterotrimeric G protein gamma subunits; gpc-2 is required, along with its partner GPB-1, a G protein beta subunit, for proper mitotic spindle positioning and orientation during early embryonic cell divisions; to date, GPC-2 expression has been reported in electrically excitable cells (all neurons and muscles). Provisional description: gpc-…
176772	WBGene00012094	T27E9.2	T27E9.2	32	16.6	14	4	0.92	9543	7.33522	SNTEETCHQEMADYVHHLDHCAMPK	MSSHKEEPLEADVDQLTQYRER	16	3	0.8	9547	8.3796	SNTEETCHQEMADYVHHLDHCAMPK	MSSHKEEPLEADVDQLTQYRER	7.85741	WBGene00012094	T27E9.2	T27E9.2	Concise description: none available Provisional description: none available Detailed description: none available
177212	WBGene00019947	R08C7.3	Q27511	39	16.1145	27	11	0.429	9543	14.1465	KGAPVPGKPGAPGQGPQ	KGAPVPGKPGAPGQGPQ	24	9	0.307	9547	12.5694	KGAPVPGKPGAPGQGPQ	KGAPVPGKPGAPGQGPQ	13.358	WBGene00019947	htz-1	R08C7.3	Concise description: htz-1 encodes the C. elegans ortholog of the H2A.Z histone variant; htz-1 is an essential gene and during development, HTZ-1 functions with the PHA-4/FoxA transcription factor and the MYS-1/TIP60-SSL-1/SWR1 remodeling complex to regulate gene expression during pharyngeal (foregut) organogenesis; a YFP::HTZ-1 fusion protein localizes to pharyngeal gene promoters at the onset o…
181776	WBGene00003369	C36E6.3	P19625	38	16.0949	86	29	0.565	9543	45.0592	RGEPLDEDEVKAMYK	RGEPLDEDEVKAMYK	88	29	0.559	9547	46.0878	RGEPLDEDEVKAMYK	AMFDKKDCGKIKEDDLIK	45.5735	WBGene00003369	mlc-1	C36E6.3	Concise description: mlc-1 encodes a muscle regulatory myosin light chain that is nearly identical to MLC-2 and functions redundantly with MLC-2 in the body-wall and in pharyngeal muscle to affect L1 larval viability, elongation, and pharyngeal and body-wall muscle development, and also affects locomotion and growth; expressed in the body-wall muscles, pharyngeal muscles, and vulval muscles. Prov…
177621	WBGene00019510	K07H8.10	K07H8.10	16	16.0496	2	2	0.014	9543	1.04789	KLDEPTVASK	RKLDEPTVASK	9	5	0.05	9547	4.71352	HQETKVDVKPK	KLDEPTVASK	2.8807	WBGene00019510	K07H8.10	K07H8.10	Concise description: none available Provisional description: none available Detailed description: none available
179069	WBGene00020808	T25F10.6	H2L0M6	58	16.0314	133	51	0.724	9543	69.6846	YKDEVRGDMPHDEGTLSR	ASDGIVPLQSGTNKLASQAGMTGIGMPR	117	40	0.692	9547	61.2758	QVYTPFTDDTHEDLPADIAR	YKDEVRGDMPHDEGTLSR	65.4802	WBGene00020808	T25F10.6	T25F10.6a	Concise description: none available Provisional description: none available Detailed description: none available
181348	WBGene00001502	F52D10.3	Q95ZT1	67	15.8438	22	10	0.505	9543	11.5268	YLAEVASGDDRNSVVEK	KVTELGAELSNEERNLLSVAYKNVVGAR	30	12	0.465	9547	15.7117	YLAEVASGDDRNSVVEK	MSDGKEELVNRAK	13.6192	WBGene00001502	ftt-2	F52D10.3a	Concise description: none available Provisional description: none available Detailed description: none available
175384	WBGene00002915	H19M22.2	Q9UB29	33	15.3166	25	9	0.032	9543	13.0986	SLSASALAANREAAHQSSSYLQTGGTLSR	INNYTSSSNDRGQGDVVEEKYHR	26	13	0.041	9547	13.6168	SLSASALAANREAAHQSSSYLQTGGTLSR	HYTPGDYLKQDAEEGYNSLSR	13.3577	WBGene00002915	let-805	H19M22.2a	Concise description: let-805 encodes myotactin, a novel single-transmembrane protein containing extracellular fibronectin repeats; genetic analyses indicate that LET-805 is essential for proper association between hypodermal fibrous organelles and the contractile apparatus of muscle cells; LET-805 is expressed in hypodermal cells and in the pharynx and localizes to basolateral membranes. Provisio…
178404	WBGene00013308	Y57G11C.12	O18236	15	14.86	5	2	0.107	9543	2.61972	TVAPIKSNNSAEAR	VAPIKSNNSAEAR	3	1	0.107	9547	1.57117	TVAPIKSNNSAEAR	NA	2.09544	WBGene00013308	nuo-3	Y57G11C.12a	Concise description: The nuo-3 locus encodes two distinct, non-overlapping proteins: Y57G11C.12a (homologous to human C3orf10/BRICK1, a component of the WAVE1 complex) and Y57G11C.12b (a putative NADH-ubiquinone oxidoreductase alpha subunit, homologous to human NDUFA6 [OMIM:602138]). Provisional description: The nuo-3 locus encodes two distinct, non-overlapping proteins: Y57G11C.12a (homologous t…
179533	WBGene00000063	T04C12.6	P0DM41	71	14.4945	396	93	0.793	9543	207.482	HQGVMVGMGQKDSYVGDEAQSKR	HQGVMVGMGQKDSYVGDEAQSKR	384	95	0.774	9547	201.11	HQGVMVGMGQKDSYVGDEAQSKR	HQGVMVGMGQKDSYVGDEAQSKR	204.296	WBGene00000063	act-1	T04C12.6	Concise description: act-1 encodes an actin isoform that is required for proper body wall muscle and pharyngeal muscle structures and the motility of animals; actins have highly similar amino acid sequences; ACT-1 is identical to ACT-3; act-1 functions redundantly with two other actin isoforms, act-2 and act-3, to control cytoplasmic microfilament function in the early embryo. Provisional descrip…
175081	WBGene00001971	Y48B6A.14	G5EFV4	39	14.1014	27	8	0.474	9543	14.1465	KAADDKKRYEVDIANYKK	KAADDKKRYEVDIANYK	34	10	0.474	9547	17.8066	KAADDKKRYEVDIANYKK	AADDKKRYEVDIANYKK	15.9765	WBGene00001971	hmg-1.1	Y48B6A.14	Concise description: hmg-1.1 encodes a member of the high mobility group (HMG) family of proteins. Provisional description: hmg-1.1 encodes a member of the high mobility group (HMG) family of proteins. Detailed description: none available
177482	WBGene00000942	ZC477.9	V6CK82	25	14.0019	12	5	0.07	9543	6.28733	SHVDDAIDTGEFVR	TIENILEPVAQQVSR	13	5	0.07	9547	6.80842	SHVDDAIDTGEFVR	SVNASPPTAPIIHNK	6.54788	WBGene00000942	deb-1	ZC477.9a	Concise description: The deb-1 gene encodes a vinculin ortholog highly conserved amongst metazoans including Drosophila, chick, and humans (OMIM:193065); DEB-1 is a muscle attachment protein found in dense bodies, and is required for attaching actin thin filaments to the basal sarcolemma; DEB-1 requires PAT-4/integrin-linked kinase for full assembly into nascent attachments. Provisional descripti…
172397	WBGene00006819	F08B6.4	Q6LD30	42	13.9643	77	28	0.658	9543	40.3437	PPTEDQVVAEEQPNATMETK	MVDSKHPEYDHEKPDQSEIPLQSGTNKFASQK	82	27	0.701	9547	42.9454	MVDSKHPEYDHEKPDQSEIPLQSGTNKFASQK	PPTEDQVVAEEQPNATMETK	41.6446	WBGene00006819	unc-87	F08B6.4a	Concise description: unc-87 encodes, through alternative splicing, two proteins that are required to maintain the structure of myofilaments in body wall muscle cells; UNC-87 proteins resemble the C-terminal repeat region of calponin but have no obvious orthologs outside of nematodes; in vitro, UNC-87 proteins exist as monomers in solution, associate with thin (F-actin) filaments but not with mono…
180393	WBGene00002060	R04A9.4	Q21693	32	13.8417	3	2	0.162	9543	1.57183	MSEEPVAAPGTISHPVYK	QVLNNASMIHQRPLYDVLR	2	1	0.079	9547	1.04745	MSEEPVAAPGTISHPVYK	NA	1.30964	WBGene00002060	ife-2	R04A9.4	Concise description: ife-2 encodes a translation initiation factor 4F, cap-binding subunit (eIF-4E); by homology, IFE-2 is predicted to function in cap-dependent mRNA translation initiation; loss of ife-2 activity in adult animals extends lifespan. Provisional description: ife-2 encodes a translation initiation factor 4F, cap-binding subunit (eIF-4E); by homology, IFE-2 is predicted to function i…
176793	WBGene00000067	T25C8.2	O45815	70	13.7078	258	59	0.624	9543	135.178	HQGVMVGMGQKDSYVGDEAQSKR	HQGVMVGMGQKDSYVGDEAQSKR	261	57	0.571	9547	136.692	HQGVMVGMGQKDSYVGDEAQSKR	HQGVMVGMGQKDSYVGDEAQSKR	135.935	WBGene00000067	act-5	T25C8.2	Concise description: an ortholog of human cytoplasmic actin; and is expressed only in microvillous intestinal cells and excretory cell. Provisional description: an ortholog of human cytoplasmic actin; and is expressed only in microvillous intestinal cells and excretory cell. Detailed description: none available
266845	WBGene00000931	C25A1.10	Q9XVS4	14	13.5579	2	2	0.042	9543	1.04789	AKPLATSTEKAVYENR	IASSSGNEPPVKK	3	2	0.042	9547	1.57117	IASSSGNEPPVKK	AKPLATSTEKAVYENR	1.30953	WBGene00000931	dao-5	C25A1.10a	Concise description: dao-5 encodes a predicted nucleolar phosphoprotein related to Saccharomyces cerevisiae SRP40 and the vertebrate Nopp140 proteins that may play a role in rRNA gene transcription and nucleolar structural organization; dao-5 expression is negatively regulated by the DAF-2/insulin-like receptor and positively regulated by the DAF-16/fork-head transcription factor, suggesting that…
174993	WBGene00009740	F45H10.3	F45H10.3	19	12.8927	7	5	0.232	9543	3.66761	SKQNELASQQKNTEFEYLQR	SKQNELASQQKNTEFEYLQRFDKFTK	5	4	0.155	9547	2.61862	SKQNELASQQKNTEFEYLQRFDKFTK	SKQNELASQQKNTEFEYLQR	3.14311	WBGene00009740	F45H10.3	F45H10.3	Concise description: none available Provisional description: none available Detailed description: none available
178113	WBGene00003920	M117.2	N1NV25	68	12.8364	32	14	0.496	9543	16.7662	VISSIEQKTEGSEKKQQLAKEYR	AKLAEQAERYDDMAAAMK	41	15	0.431	9547	21.4727	VISSIEQKTEGSEKKQQLAKEYR	YLAEVASEDRAAVVEK	19.1195	WBGene00003920	par-5	M117.2	Concise description: PAR-5 encodes one of two C. elegans 14-3-3 proteins; par-5 is essential for early embryonic development, particularly for early embryonic asymmetry; PAR-5 also functions in a Wnt/MAPK signaling pathway to regulate the nuclear level of the POP-1/TCF transcription factor; PAR-5 has been shown to physically interact with a number of proteins, including those involved in G protei…
181340	WBGene00009259	F29G6.3	Q6A2D2	18	12.8242	5	3	0.071	9543	2.61972	VNPTVQQHVIYNPYGDHQSVR	STTVVLEDVRSGSEGVSSLRR	4	2	0.054	9547	2.0949	VNPTVQQHVIYNPYGDHQSVR	STTVVLEDVRSGSEGVSSLRR	2.35731	WBGene00009259	hpo-34	F29G6.3a	Concise description: none available Provisional description: none available Detailed description: none available
173459	WBGene00020181	T02H6.11	T02H6.11	22	12.7387	9	4	0.315	9543	4.7155	AHTLALHGEKLPK	RLNLQEPHVFDQR	10	5	0.323	9547	5.23725	AHTLALHGEKLPK	RLNLQEPHVFDQR	4.97637	WBGene00020181	T02H6.11	T02H6.11	Concise description: none available Provisional description: none available Detailed description: none available
174557	WBGene00002266	ZK892.1	I2HAG1	22	12.5157	9	2	0.095	9543	4.7155	AHDSKFQVSINHKEVK	SKLTERIEPGQTLIIR	8	3	0.136	9547	4.1898	SKLTERIEPGQTLIIR	AHDSKFQVSINHKEVK	4.45265	WBGene00002266	lec-3	ZK892.1a	Concise description: none available Provisional description: none available Detailed description: none available
187502	WBGene00019800	PAR2.1	P34496	22	12.4469	6	3	0.253	9543	3.14367	LHYSGGQKDEQGNRTQR	AEQPSKQEVDDLFAEKPQHHNPEQRR	8	3	0.253	9547	4.1898	AEQPSKQEVDDLFAEKPQHHNPEQRR	LHYSGGQKDEQGNR	3.66674	WBGene00019800	mtss-1	PAR2.1	Concise description: none available Provisional description: none available Detailed description: none available
180566	WBGene00020511	T14G11.3	Q22505	26	12.0768	15	8	0.144	9543	7.85916	QLFEIEQNQKVEEAVLQER	TASAHSEHLEQVIR	11	5	0.078	9547	5.76097	QLFEIEQNQKVEEAVLQER	TASAHSEHLEQVIR	6.81006	WBGene00020511	immt-1	T14G11.3	Concise description: none available Provisional description: none available Detailed description: none available
176011	WBGene00004490	F37C12.11	P49197	60	11.9824	106	26	0.841	9543	55.5381	IIGPKDHASVQIDFVDVDPETGRMIPGKSTR	IIGPKDHASVQIDFVDVDPETGR	99	26	0.841	9547	51.8487	MQNDAGQTVELYVPRK	IIGPKDHASVQIDFVDVDPETGR	53.6934	WBGene00004490	rps-21	F37C12.11	Concise description: rps-21 encodes a small ribosomal subunit S21 protein; by homology, RPS-21 is predicted to function in protein biosynthesis; in C. elegans, RPS-21 activity is required for embryonic and germline development, as well as the overall health of the animal. Provisional description: rps-21 encodes a small ribosomal subunit S21 protein; by homology, RPS-21 is predicted to function in…
181545	WBGene00001898	M163.3	P10771	40	11.3192	47	13	0.37	9543	24.6254	MSDSAVVAAAVEPKVPKAK	SDSAVVAAAVEPKVPK	41	14	0.404	9547	21.4727	MSDSAVVAAAVEPKVPKAK	AKAPVAHPPYINMIK	23.0491	WBGene00001898	his-24	M163.3	Concise description: his-24 encodes one of eight C. elegans H1 linker histones; HIS-24, along with the histone deacetylase SIR-2.1 and the Enhancer of zeste E(Z) ortholog MES-2, plays a key role in heterochromatin regulation and thus, in regulation of fertility and embryonic development; specifically, HIS-24 and SIR-2.1 are essential for maintenance of the histone H3K27me3 mark at subtelomeric re…
177524	WBGene00019900	R05G6.7	Q21752	56	11.2771	100	35	0.565	9543	52.3944	AGDNKEVEFKSAASHNIGSGK	AGDNKEVEFKSAASHNIGSGK	96	34	0.562	9547	50.2776	AGDNKEVEFKSAASHNIGSGK	AGDNKEVEFKSAASHNIGSGK	51.336	WBGene00019900	R05G6.7	R05G6.7	Concise description: none available Provisional description: none available Detailed description: none available
173525	WBGene00019207	H17B01.1	O44827	13	11.0999	2	2	0.059	9543	1.04789	GVNDHDVSVPLQEVQSR	GQRNEAESALKK	1	1	0.035	9547	0.523725	GVNDHDVSVPLQEVQSR	NA	0.785807	WBGene00019207	fgt-1	H17B01.1a	Concise description: none available Provisional description: none available Detailed description: none available
173076	WBGene00011059	R06C1.4	R06C1.4	28	10.7852	12	5	0.786	9543	6.28733	GFAFVEFSEEAGAQR	AVEQLNGVAFNGR	14	5	0.464	9547	7.33215	GFAFVEFSEEAGAQR	AVEQLNGVAFNGR	6.80974	WBGene00011059	R06C1.4	R06C1.4	Concise description: none available Provisional description: none available Detailed description: none available
174421	WBGene00000378	T21B10.7	P47207	40	10.3726	5	3	0.066	9543	2.61972	MLPVQILKDNAQEERGESAR	SSIESGDNIRDDLLK	4	3	0.087	9547	2.0949	VAELEAAEKLK	SSIESGDNIRDDLLK	2.35731	WBGene00000378	cct-2	T21B10.7	Concise description: cct-2 encodes a putative beta subunit of the eukaryotic cytosolic ('T complex') chaperonin, orthologous to human CCT2 (OMIM:605139); CCT-2 is expressed in most, if not all, tissues; CCT-2 represses SKN-1-dependent transcription of gst-4; CCT-2 is expressed in touch receptor neurons in a MEC-3-dependent fashion; in mass RNAi assays, CCT-2 is required for normal transgene repre…
177609	WBGene00002162	F42G8.12	O44512	32	10.1888	20	8	0.254	9543	10.4789	VISGSQQHVNFVAATPAADNVAAFRDVPAEFSTAEAR	DSTKNTQVPARDTEDQRR	23	8	0.312	9547	12.0457	VISGSQQHVNFVAATPAADNVAAFRDVPAEFSTAEAR	DSTKNTQVPARDTEDQRR	11.2623	WBGene00002162	isp-1	F42G8.12	Concise description: isp-1 encodes a Rieske iron sulphur protein (ISP) which is a subunit of the mitochondrial complex III in the mitochondrial membrane; the subunits are highly conserved in all mitochondria and aerobic bacteria; mitochondrial complex III catalyses electron transport from ubiquinol to cytochrome c; isp-1 mutants show low oxygen consumption, a decreased sensitivity to reactive oxy…
181238	WBGene00009621	F41E7.5	Q20277	41	10.0795	22	12	0.58	9543	11.5268	GGPTIIKETIIR	GGFGGGPGSNYGPGR	20	10	0.58	9547	10.4745	GGFGGGPGSNYGPGR	GGPTIIKETIIR	11.0007	WBGene00009621	fipr-21	F41E7.5	Concise description: none available Provisional description: none available Detailed description: none available
181044	WBGene00001169	R03G5.1	G8JY74	72	9.8176	187	54	0.624	9543	97.9776	QTVAVGVIKSVEKSDGSSGKVTK	IGGIGTVPVGRVETGIIKPGMVVTFAPQNVTTEVK	181	53	0.587	9547	94.7942	DMRQTVAVGVIKSVEKSDGSSGKVTK	QTVAVGVIKSVEKSDGSSGKVTK	96.3859	WBGene00001169	eef-1A.2	R03G5.1a	Concise description: eft-4 encodes a translation elongation factor 1-alpha homolog that is required for embryonic viability, fertility, and a normal postembryonic growth rate; eft-4 encodes at least one alternatively spliced coding sequence identical to that of eft-3. Provisional description: Paralogs are encoded by H19N07.1, K07A12.4, and other genes. Detailed description: none available
186113	WBGene00002021	F52E1.7	Q20660	18	9.6657	3	2	0.101	9543	1.57183	SIPITIVPK	YGQVER	1	1	0.061	9547	0.523725	SIPITIVPK	NA	1.04778	WBGene00002021	hsp-17	F52E1.7a	Concise description: hsp-17 encodes a heat shock protein that is a member of the hsp16/hsp20/alpha-crystallin family of heat shock proteins; by homology, HSP-17 is predicted to function as a molecular chaperone that protects cells from heat-induced protein aggregation and denaturation; at present, the precise developmental and/or behavioral role of HSP-17, as well as its expression pattern, are n…
176975	WBGene00004497	Y41D4B.5	Q95Y04	63	9.395	30	7	0.846	9543	15.7183	NVKGPVREGDILTLLESEREAR	SIIRNVKGPVREGDILTLLESEREAR	32	9	0.846	9547	16.7592	SIIRNVKGPVREGDILTLLESEREAR	GPVREGDILTLLESEREAR	16.2387	WBGene00004497	rps-28	Y41D4B.5	Concise description: rps-28 encodes a small ribosomal subunit S28 protein. Provisional description: rps-28 encodes a small ribosomal subunit S28 protein. Detailed description: none available
173134	WBGene00010419	H28O16.1	H28O16.1	70	9.163	155	45	0.45	9543	81.2114	ILGTETGINLEETGKVLSIGDGIAR	LSVREPMVTGVKAVDSLVPIGR	148	48	0.403	9547	77.5113	ILGTETGINLEETGKVLSIGDGIAR	LSVREPMVTGVKAVDSLVPIGR	79.3614	WBGene00010419	H28O16.1	H28O16.1a	Concise description: none available Provisional description: none available Detailed description: none available
173237	WBGene00012354	W09C5.8	W09C5.8	30	9.0873	15	5	0.291	9543	7.85916	FRKEDSVIAPIR	ALVLEKGQFLGAPTHYDYENKKWK	10	5	0.291	9547	5.23725	FRKEDSVIAPIR	RKEDSVIAPIR	6.54821	WBGene00012354	W09C5.8	W09C5.8	Concise description: W09C5.8 encodes the C. elegans ortholog of the cytochrome c oxidase (COX) subunit IV (COX IV); loss of W09C5.8 activity via RNAi results in a shortened life span, reduced fertility, and defects in mitochondrial respiratory chain function. Provisional description: W09C5.8 encodes the C. elegans ortholog of the cytochrome c oxidase (COX) subunit IV (COX IV); loss of W09C5.8 act…
175768	WBGene00003371	F09F7.2	G8JY79	70	9.0523	122	35	0.889	9543	63.9212	HILLALGERLSADEADELLKGVEDGEGMVKYEDFIKK	LSADEADELLKGVEDGEGMVKYEDFIKK	103	33	0.889	9547	53.9436	APPSQDVLKEIFNLYDEELDGKIDGTQVGDVAR	LSADEADELLKGVEDGEGMVKYEDFIKK	58.9324	WBGene00003371	mlc-3	F09F7.2a	Concise description: mlc-3 encodes an essential myosin light chain; large-scale RNAi screens indicate that mlc-3 activity is required for both embryonic and postembryonic development, as well as for normal locomotion and egg laying. Provisional description: mlc-3 encodes an essential myosin light chain; large-scale RNAi screens indicate that mlc-3 activity is required for both embryonic and poste…
177786	WBGene00007880	C33A12.1	C33A12.1	26	8.7826	6	4	0.167	9543	3.14367	TTGITGLFVNEHPHR	SKVSEDFHKK	7	4	0.167	9547	3.66607	KTTGITGLFVNEHPHR	TTGITGLFVNEHPHR	3.40487	WBGene00007880	C33A12.1	C33A12.1	Concise description: C33A12.1 encodes the C. elegans ortholog of the NDUFA5/B13 subunit of the mitochondrial NADH dehydrogenase (ubiquinone) complex (complex I). Provisional description: C33A12.1 encodes the C. elegans ortholog of the NDUFA5/B13 subunit of the mitochondrial NADH dehydrogenase (ubiquinone) complex (complex I). Detailed description: none available
179541	WBGene00007385	C06H2.1	Q17763	62	8.7769	88	19	0.749	9543	46.1071	APPVEHFDRQHFVEYFPAHFYDLR	IKLHEVKVADGLQEAK	84	22	0.885	9547	43.9929	APPVEHFDRQHFVEYFPAHFYDLR	IKLHEVKVADGLQEAK	45.05	WBGene00007385	atp-5	C06H2.1	Concise description: none available Provisional description: none available Detailed description: none available
174379	WBGene00004440	F28C6.7	Q19869	64	8.723	92	28	0.718	9543	48.2029	EKANGSTVHIGIHPSKVAITK	AIPIRTDDEVVVMR	88	27	0.704	9547	46.0878	EKANGSTVHIGIHPSKVAITK	VTGILKGKHTDETVN	47.1454	WBGene00004440	rpl-26	F28C6.7a	Concise description: rpl-26 encodes a large ribosomal subunit L26 protein; by homology, RPL-26 is predicted to function in protein biosynthesis; in C. elegans, RPL-26 activity is required for embryonic and germline development and normal rates of postembryonic growth. Provisional description: rpl-26 encodes a large ribosomal subunit L26 protein; by homology, RPL-26 is predicted to function in pro…
172491	WBGene00006754	F07A5.7	B3WFV3	64	8.6042	56	17	0.196	9543	29.3409	RYQHELEDAEGRADQAESSLHLIR	YQHELEDAEGRADQAESSLHLIR	50	16	0.181	9547	26.1862	RYQHELEDAEGRADQAESSLHLIR	YQHELEDAEGRADQAESSLHLIR	27.7635	WBGene00006754	unc-15	F07A5.7a	Concise description: The unc-15 gene encodes a paramyosin ortholog; UNC-15 protein physically interacts with MHC A, one isoform of myosin heavy chain (MHC) in striated muscle; UNC-15 accumulation is decreased in the absence of UNC-54 (myosin B), implying that degradation of UNC-15 is inhibited by its binding myosin B; conversely, myosin B (but not MYO-3/myosin A) fails to accumulate in unc-15 mut…
266824	WBGene00021839	Y54E10BL.5	Q9N3D9	23	8.4728	4	2	0.372	9543	2.09578	MATGNRNPENFTSLSPIVK	IAKPYVDNHPEPGQFKTDHFQWNRIN	6	5	0.504	9547	3.14235	MATGNRNPENFTSLSPIVK	MATGNRNPENFTSLSPIVKAPITDTLSVPLSQQGR	2.61906	WBGene00021839	nduf-5	Y54E10BL.5	Concise description: Y54E10BL.5 encodes the C. elegans ortholog of the NDUFS5/15 kDa subunit of the mitochondrial NADH dehydrogenase (ubiquinone) complex (complex I). Provisional description: Y54E10BL.5 encodes the C. elegans ortholog of the NDUFS5/15 kDa subunit of the mitochondrial NADH dehydrogenase (ubiquinone) complex (complex I). Detailed description: none available
179739	WBGene00004442	R11D1.8	Q21930	59	8.4523	59	25	0.675	9543	30.9127	YSGLANKHAIDVSAAAK	SGLANKHAIDVSAAAK	55	22	0.698	9547	28.8049	YSGLANKHAIDVSAAAK	SGLANKHAIDVSAAAK	29.8588	WBGene00004442	rpl-28	R11D1.8	Concise description: rpl-28 encodes a large ribosomal subunit L28 protein. Provisional description: rpl-28 encodes a large ribosomal subunit L28 protein. Detailed description: none available
171768	WBGene00004014	Y37E3.9	Q9BKU4	54	8.1469	49	17	0.538	9543	25.6733	IAAVTTAEGDAQAAKLLAK	YLVEKAEQMKIAAVTTAEGDAQAAK	36	13	0.451	9547	18.8541	YLVEKAEQMKIAAVTTAEGDAQAAK	IAAVTTAEGDAQAAKLLAK	22.2637	WBGene00004014	phb-1	Y37E3.9	Concise description: phb-1 encodes the C. elegans ortholog of prohibitin PHB1; loss of phb-1 activity via RNAi indicates that phb-1 function is required for mitochondrial organization and morphology and for embryonic, germline, and somatic gonad development; PHB-1, along with prohibitin subunit PHB-2, forms a macromolecular complex that localizes to mitochondrial membranes; PHB-1 and PHB-2 are de…
173360	WBGene00001488	ZK270.2	G5EEP9	26	8.0936	7	4	0.016	9543	3.66761	FRHEGDEDVVEKPDPYQIA	VRTEPEAEIVDVPVVKETK	6	2	0.007	9547	3.14235	QTVIEAIETPAEPEKKR	TALCKEVDEVPIGR	3.40498	WBGene00001488	frm-1	ZK270.2a	Concise description: none available Provisional description: none available Detailed description: none available
184918	WBGene00017771	F25B4.8	F25B4.8	55	8.0185	52	14	0.55	9543	27.2451	SNPDAVAIMPHCIDGK	MSEVQHFGSCHCGAVK	53	15	0.55	9547	27.7574	MSEVQHFGSCHCGAVK	SNPDAVAIMPHCIDGK	27.5012	WBGene00017771	F25B4.8	F25B4.8a	Concise description: none available Provisional description: none available Detailed description: none available
175605	WBGene00000206	F35G12.10	Q20053	26	7.9306	5	3	0.159	9543	2.61972	AATGHAVAPSSDNSIGYFEK	LINDSVEKQVSQKDFQEK	8	3	0.159	9547	4.1898	AATGHAVAPSSDNSIGYFEK	LINDSVEKQVSQKDFQEK	3.40476	WBGene00000206	asb-1	F35G12.10	Concise description: asb-1 encodes the B subunit of the membrane-bound F0 proton channel portion of ATP synthase (mitochondrial respiratory chain [MRC] complex V) that is closely similar to its paralog ASB-2; asb-1 activity is required for embryonic viability and for normal proliferation of germline cells, specifically their progression to meiosis; in addition, asb-1 is required for response to h…
176858	WBGene00004493	T07A9.11	Q1XFY9	62	7.8565	60	21	0.634	9543	31.4367	KQMVVEVIHPGRPTVPK	KQMVVEVIHPGRPTVPK	64	21	0.557	9547	33.5184	KQMVVEVIHPGRPTVPK	SKGFALVYDTIDFAK	32.4776	WBGene00004493	rps-24	T07A9.11	Concise description: rps-24 encodes a small ribosomal subunit S24 protein; by homology, RPS-24 is predicted to function in protein biosynthesis; in C. elegans, RPS-24 activity is required for germline development and the overall health of the animal. Provisional description: rps-24 encodes a small ribosomal subunit S24 protein; by homology, RPS-24 is predicted to function in protein biosynthesis;…
172061	WBGene00004479	D1007.6	O01869	65	7.8233	84	18	0.738	9543	44.0113	THPNIEGVSNLEVIKTLK	AAQGEKGDREAYRTEKVTEAGPGGAPVYR	81	18	0.691	9547	42.4217	THPNIEGVSNLEVIKTLK	AAQGEKGDREAYRTEKVTEAGPGGAPVYR	43.2165	WBGene00004479	rps-10	D1007.6	Concise description: rps-10 encodes a small (40S) ribosomal subunit S10 protein; loss of rps-10 activity in adult animals extends lifespan. Provisional description: rps-10 encodes a small (40S) ribosomal subunit S10 protein; loss of rps-10 activity in adult animals extends lifespan. Detailed description: none available
173976	WBGene00002053	F10C1.2	Q19289	63	7.8163	65	26	0.392	9543	34.0564	MVTEMGSATVGGISPALSANAAK	NKDENVGEHKIR	61	27	0.397	9547	31.9472	MVTEMGSATVGGISPALSANAAK	NKDENVGEHKIR	33.0018	WBGene00002053	ifb-1	F10C1.2a	Concise description: ifb-1 (also known as vab-21) encodes two isoforms of an essential intermediate filament protein that is coexpressed with the essential IF proteins IFA-1, IFA-2, and IFA-3, along with IFA-4; IFB-1 is required for embryonic development and epidermal morphogenesis; IFB-1 forms heteropolymeric intermediate filaments in vitro with an equimolar mixture of IFA-1, IFA-2, or IFA-3, an…
177106	WBGene00015248	B0546.1	O44441	40	7.6869	21	5	0.486	9543	11.0028	AQLQELREHIQEEVKHHEGQLENHKK	ISEIEAQERALGKE	19	4	0.367	9547	9.95077	AQLQELREHIQEEVKHHEGQLENHKK	ISEIEAQERALGKE	10.4768	WBGene00015248	mai-2	B0546.1	Concise description: mai-2/B0546.1 is orthologous to mitochondrial intrinsic ATPase inhibitor protein (IF(1)), which blocks reverse action (ATP hydrolysis) by F(0)F(1)-ATPase when its (normally required) proton gradient is lost; MAI-2 has a mitochondrial import signal at its N-terminus, and is transported to yeast mitochondria; MAI-2 can inhibit yeast F(0)F(1)-ATPase, and this inhibition is pH-de…
172037	WBGene00003061	ZK973.10	Q9N4L8	18	7.6093	2	2	0.062	9543	1.04789	STGKDNLPVTR	TGKDNLPVTR	2	1	0.051	9547	1.04745	GKDNLPVTR	NA	1.04767	WBGene00003061	lpd-5	ZK973.10	Concise description: lpd-5 is orthologous to the human gene NADH DEHYDROGENASE (UBIQUINONE) FE-S PROTEIN 4 (18KD) (NADH-COENZYME Q REDUCTASE) (NDUFS4; OMIM:602694), which when mutated leads to NADH:ubiquinone oxidoreductase (complex I) deficiency. Provisional description: lpd-5 is orthologous to the human gene NADH DEHYDROGENASE (UBIQUINONE) FE-S PROTEIN 4 (18KD) (NADH-COENZYME Q REDUCTASE) (NDUF…
172195	WBGene00000230	F27C1.7	Q7JNG1	56	7.4782	49	15	0.333	9543	25.6733	YAAALYSAGHKQNKLDQISTDLNNVR	AAALYSAGHKQNKLDQISTDLNNVR	52	13	0.39	9547	27.2337	YAAALYSAGHKQNKLDQISTDLNNVR	AAALYSAGHKQNKLDQISTDLNNVR	26.4535	WBGene00000230	atp-3	F27C1.7a	Concise description: atp-3 encodes the C. elegans homolog of the ATP5O subunit of mitochondrial ATP synthase (complex V); as part of the ATP synthase complex, ATP-3 controls respiration and regulates growth rate and body size, aging, and rates of behaviors such as pharyngeal pumping, defecation, and locomotion; loss of atp-3 function during larval development indicates that respiratory rates esta…
172805	WBGene00004488	T05F1.3	O18650	64	7.3956	82	24	0.644	9543	42.9634	TRATSIKDVDQHEATKSIAHFLKK	TRATSIKDVDQHEATK	83	23	0.644	9547	43.4692	TRATSIKDVDQHEATKSIAHFLKK	TRATSIKDVDQHEATK	43.2163	WBGene00004488	rps-19	T05F1.3	Concise description: rps-19 encodes a small ribosomal subunit S19 protein, orthologous to human RPS19 (OMIM:603474, mutated in Diamond-Blackfan anemia). Provisional description: rps-19 encodes a small ribosomal subunit S19 protein, orthologous to human RPS19 (OMIM:603474, mutated in Diamond-Blackfan anemia). Detailed description: none available
187645	WBGene00001784	R07B1.4	Q09607	71	7.3396	107	30	0.714	9543	56.062	KSEMPLGQVPVLEIDGVKISQTTAIAR	KSEMPLGQVPVLEIDGVKISQTTAIAR	93	33	0.743	9547	48.7064	KSEMPLGQVPVLEIDGVKISQTTAIAR	VLLGMIQANKEQFFKENVLPDVEK	52.3842	WBGene00001784	gst-36	R07B1.4	Concise description: none available Provisional description: none available Detailed description: none available
176148	WBGene00002011	C14B9.1	P34328	37	7.2535	14	4	0.364	9543	7.33522	AYKLPDDVDVSTVKSHLATR	AYKLPDDVDVSTVK	16	7	0.5	9547	8.3796	AYKLPDDVDVSTVKSHLATR	AYKLPDDVDVSTVK	7.85741	WBGene00002011	hsp-12.2	C14B9.1	Concise description: hsp-12.2 encodes a small heat-shock protein that forms heterotetramers with HSP-12.3 and has no chaperone-like activity; structurally, HSP-12.2 is mostly a beta-sheet; at least one HSP-12 (which may or may not be HSP-12.2) is ubiquitously expressed in L1 larvae, and later expressed in adult spermatids (and perhaps spermatocytes), and some adult vulval cells. Provisional descr…
174590	WBGene00010015	F54B3.3	Q20748	29	7.1875	3	2	0.042	9543	1.57183	KRAEEELAMKAR	KQEESVKKQEQLR	8	4	0.089	9547	4.1898	KRAEEELAMKAR	ILLQYFNEHIVTPATSGSR	2.88082	WBGene00010015	atad-3	F54B3.3	Concise description: atad-3 encodes the ortholog of the vertebrate mitochondrial protein ATAD3; both vertebrate and elegans ATAD-3 contain the conserved AAA (ATPases associated with a variety of cellular activities) domain; atad-3 is required for normal mitochondrial morphology and activity as atad-3 mutants show reduced complex I and citrate synthase activities; atad-3 is also required for embry…
178709	WBGene00017499	F15E11.13	G5EET8	31	7.1812	7	3	0.245	9543	3.66761	TEVDNKGHQIGKK	MSTDPTPPQLTRR	10	5	0.384	9547	5.23725	TEVDNKGHQIGKK	TEVDNKGHQIGK	4.45243	WBGene00017499	F15E11.13	F15E11.13	Concise description: F15E11.13, along with Y19D10B.7, encodes a protein (CE25224) of unknown function; the Y19D10B.7/F15E11.13 proteins are present at significantly higher levels in daf-2 mutant vs. wild-type adults during a temperature shift from 15 to 25 degrees C; F15E11.13 (RNAi) animals have no obvious mutant phenotype (i. e., they have no obvious defect in fertility or germline maintenance)…
180718	WBGene00000207	F02E8.1	Q19126	58	7.1069	61	18	0.38	9543	31.9606	AHAASTQAAAATDDAPNFFQK	LINSEVDKEFSDRSFKDKYLQNAIQQLK	54	16	0.38	9547	28.2811	AHAASTQAAAATDDAPNFFQK	RIDYLKETEESKAR	30.1209	WBGene00000207	asb-2	F02E8.1	Concise description: asb-2 encodes the B subunit of the membrane-bound F0 proton channel portion of ATP synthase (mitochondrial respiratory chain [MRC] complex V) that is closely similar to its paralog ASB-1; RNAi experiments indicate that asb-2 activity is required for larval development as well as for normal body morphology, lifespan, and growth rate. Provisional description: asb-2 encodes the …
171800	WBGene00017734	F23C8.5	F23C8.5	36	7.1048	12	3	0.212	9543	6.28733	GADKAVHVQVTDAEAGKLESFHVAK	KLATEVVAFSLGGPK	10	3	0.212	9547	5.23725	GADKAVHVQVTDAEAGKLESFHVAK	KLATEVVAFSLGGPK	5.76229	WBGene00017734	F23C8.5	F23C8.5	Concise description: The F23C8.5 gene encodes an ortholog of the human gene ELECTRON TRANSFER FLAVOPROTEIN BETA SUBUNIT (ETFB), which when mutated leads to glutaricaciduria type IIB (OMIM:130410). Provisional description: The F23C8.5 gene encodes an ortholog of the human gene ELECTRON TRANSFER FLAVOPROTEIN BETA SUBUNIT (ETFB), which when mutated leads to glutaricaciduria type IIB (OMIM:130410). D…
175786	WBGene00004481	F54E7.2	P49196	63	7.0893	58	18	0.971	9543	30.3888	MSDAGGDVQVAPAAVAQGPMDKEGALR	KVVGCSSAVVTNWGNEEQGR	62	18	0.936	9547	32.4709	KVVGCSSAVVTNWGNEEQGR	LVETLCAEHQIPLIK	31.4298	WBGene00004481	rps-12	F54E7.2	Concise description: rps-12 encodes a small ribosomal subunit S12 protein; by homology, RPS-12 is predicted to function in protein biosynthesis; in C. elegans, RPS-12 activity is required for embryonic and germline development, normal movement, and the overall health of the animal. Provisional description: rps-12 encodes a small ribosomal subunit S12 protein; by homology, RPS-12 is predicted to f…
177369	WBGene00004112	C46G7.4	V6CKH6	24	7.0813	4	4	0.08	9543	2.09578	SIPVQNYQSSNYNK	SYSSQTTTQHQPQPVAANNNYSTSYHTER	2	2	0.045	9547	1.04745	SIPVQNYQSSNYNK	HHKQETTTTTTTTPQPPVFQTTTYPTTK	1.57161	WBGene00004112	pqn-22	C46G7.4a	Concise description: The protein product of this gene is predicted to contain a glutamine/asparagine (Q/N)-rich ('prion') domain, by the algorithm of Michelitsch and Weissman (as of the WS77 release of WormBase, i.e., in wormpep77). Provisional description: Proteins bearing such domains can sometimes stably exist in at least two distinct physical states, each associated with a different phenotype…
175716	WBGene00000229	C34E10.6	P46561	68	7.0445	89	26	0.5	9543	46.631	GGIDDVFKKAEELAKQHGN	IMDPNVVGQNHYDIAR	80	24	0.483	9547	41.898	GGIDDVFKKAEELAKQHGN	LILEVSQHLGDNVVR	44.2645	WBGene00000229	atp-2	C34E10.6	Concise description: atp-2 encodes the beta subunit of the soluble, catalytic F1 portion of ATP synthase (mitochondrial respiratory chain [MRC] complex V); atp-2 activity is required for embryonic and larval development past the L3 stage, as well as for normal mobility, pharyngeal pumping, defecation, growth rate, and larval lifespan; in males, atp-2 activity is also required cell autonomously in…
181775	WBGene00003370	C36E6.5	P19626	70	7.023	87	29	0.565	9543	45.5831	RGEPLDEDEVKAMYK	RGEPLDEDEVKAMYK	91	30	0.565	9547	47.659	RGEPLDEDEVKAMYK	AMFDKKDCGKIKEDDLIK	46.621	WBGene00003370	mlc-2	C36E6.5	Concise description: mlc-2 encodes, along with mlc-1 and mlc-4, one of three C. elegans regulatory myosin light chains; MLC-2 is predicted to function as a regulator of myosin ATPase activity, and genetic studies indicate that MLC-2 is nearly essential in hermaphrodites for normal pharyngeal muscle function, but redundant with MLC-1, with which it is nearly identical, for proper bodywall muscle d…
178740	WBGene00004130	F54E2.3	Q5PY59	38	6.9319	6	2	0.004	9543	3.14367	GKDLEAGEKVK	PVLLGHR	6	2	0.004	9547	3.14235	GKDLEAGEKVK	PVLLGHR	3.14301	WBGene00004130	ketn-1	F54E2.3a	Concise description: ketn-1 encodes an ortholog of kettin (in D. melanogaster, SALLIMUS), an invertebrate isoform or paralog of titin; ketn-1 is transcriptionally upregulated two-fold by hypoxia, requires both HIF-1 and VHL-1 for this induction, and contains three predicted HIF-1 binding sites in its predicted 5' regulatory region; ketn-1's induction by hypoxia correlates with upregulation of oth…
173309	WBGene00004489	Y105E8A.16	Q8WQA8	65	6.8921	60	22	0.897	9543	31.4367	MAVAFKNEKAITDNSEHR	VCAQLIDGAKNEHLIVKGPIR	57	20	0.897	9547	29.8523	MAVAFKNEKAITDNSEHR	MAVAFKNEKAITDNSEHRIR	30.6445	WBGene00004489	rps-20	Y105E8A.16	Concise description: rps-20 encodes a small ribosomal subunit S20 protein. Provisional description: rps-20 encodes a small ribosomal subunit S20 protein. Detailed description: none available
173235	WBGene00004445	W09C5.6	Q9U332	58	6.8751	6	4	0.328	9543	3.14367	STINEVVTREYTIHIHAR	TNDVRVDTKLNK	6	6	0.598	9547	3.14235	STINEVVTREYTIHIHAR	AIDEIKKFAK	3.14301	WBGene00004445	rpl-31	W09C5.6a	Concise description: rpl-31 encodes a large ribosomal subunit L31 protein. Provisional description: rpl-31 encodes a large ribosomal subunit L31 protein. Detailed description: none available
181316	WBGene00002050	F38B2.1	P90901	50	6.8722	30	12	0.26	9543	15.7183	SAKGNVSIHEASPDGKFIVLQNTHR	GNVSIHEASPDGKFIVLQNTHR	25	11	0.193	9547	13.0931	SAKGNVSIHEASPDGKFIVLQNTHR	QNMEQGYAKEEVKR	14.4057	WBGene00002050	ifa-1	F38B2.1a	Concise description: IFA-1 encodes an essential intermediate filament protein that is coexpressed with the essential IF protein IFB-1; IFA-1 is required for survival past the L1 larva stage, and a normal intestine; IFA-1 forms heteropolymeric intermediate filaments in vitro with an equimolar mixture of IFB-1; IFA-1 is predicted to function as a structural component of the cytoskeleton, and is req…
179676	WBGene00003515	K12F2.1	P12844	56	6.7912	18	10	0.082	9543	9.431	EKEEDSLNHETAISSLR	NLEHENTILREHLDEEAESKADLTR	15	11	0.087	9547	7.85587	EKEEDSLNHETAISSLR	QVEEAEEVAASNLNKYK	8.64344	WBGene00003515	myo-3	K12F2.1	Concise description: myo-3 encodes MHC A, the minor isoform of MHC (myosin heavy chain) that is essential for thick filament formation, and for viability, movement, and embryonic elongation; expressed in body muscle, the somatic sheath cell covering the hermaphrodite gonad, and also expressed in enteric muscle, vulval muscles of the hermaphrodite and the diagonal muscles of the male tail. Provisi…
175141	WBGene00012179	W01D2.1	W01D2.1	48	6.7549	22	7	0.261	9543	11.5268	TRHLRDVNAR	FRNGFREGTTPKPR	24	7	0.261	9547	12.5694	TRHLRDVNAR	FRNGFREGTTPKPR	12.0481	WBGene00012179	W01D2.1	W01D2.1	Concise description: none available Provisional description: none available Detailed description: none available
177283	WBGene00015329	C02B10.4	C02B10.4	7	6.7119	5	4	0.275	9543	2.61972	TAPAVVREIHTGPSTLIIK	EIHTGPSTLIIK								1.30986	WBGene00015329	C02B10.4	C02B10.4	Concise description: none available Provisional description: none available Detailed description: none available
180872	WBGene00002023	C09B8.6	Q86GU1	53	6.651	32	7	0.346	9543	16.7662	TVFREYNQEFLLPR	LRFDVANYKPEEVTVK	28	6	0.346	9547	14.6643	TVFREYNQEFLLPR	LRFDVANYKPEEVTVK	15.7152	WBGene00002023	hsp-25	C09B8.6a	Concise description: hsp-25 encodes a member of the small heat shock family of proteins; HSP-25 is expressed throughout development and in vitro, exhibits chaperone activity; HSP-25 localizes to: 1) dense bodies and M lines in body wall muscle, 2) the lining of the pharynx, and 3) to cell-cell junctions in the spermathecal wall; consistent with a role in myofibril organization, HSP-25 binds vincu…
178507	WBGene00002005	F26D10.3	P09446	72	6.6136	78	25	0.345	9543	40.8677	IINEPTAAAIAYGLDKKGHGER	MVNEAEKYKADDEAQKDR	89	30	0.403	9547	46.6115	IINEPTAAAIAYGLDKKGHGER	NQVAMNPHNTVFDAK	43.7396	WBGene00002005	hsp-1	F26D10.3	Concise description: hsp-1 encodes hsp70A, a member of the heat shock family of proteins; hsp70A is closely related to the Drosophila heat inducible hsp70s and the S. cerevisiae SSA hsp70 subfamily; the hsp-1 gene is normally expressed throughout development and upon heat-shock the hsp-1 mRNA is enhanced 2-6 fold; down-regulation of hsp-1 via RNA interference results in a small reduction in the l…
175030	WBGene00001883	ZK131.3	K7ZUH9	40	6.5712	10	6	0.279	9543	5.23944	EIAQDFKTDLR	RVTIMPK	9	6	0.316	9547	4.71352	EIAQDFKTDLR	RVTIMPK	4.97648	WBGene00001883	his-9	ZK131.3	Concise description: his-9 encodes an H3 histone; by homology, HIS-9 is predicted to function as a nucleosome component required for packaging of DNA into chromatin; his-9 is a replication-dependent histone locus that resides in the HIS3 cluster on chromosome II. Provisional description: his-9 encodes an H3 histone; by homology, HIS-9 is predicted to function as a nucleosome component required fo…
180956	WBGene00000210	C53B7.4	Q18803	35	6.3888	10	4	0.191	9543	5.23944	KTVKEQEALAALEN	STKKTVKEQEALAALEN	9	4	0.191	9547	4.71352	KTVKEQEALAALEN	STKKTVKEQEALAALEN	4.97648	WBGene00000210	asg-2	C53B7.4	Concise description: asg-2 encodes a homolog of subunit G of the membrane-bound F0 proton channel portion of ATP synthase (mitochondrial respiratory chain [MRC] complex V); asg-2 activity is required for growth at a normally high rate and for normal osmoregulation; in addition, asg-2 activity is required for response to hermaphrodite contact, the first step in a series of stereotypical male matin…
176773	WBGene00006439	T27E9.1	Q86CZ9	64	6.3332	57	26	0.39	9543	29.8648	SFDTKKFLIDLASGGTAAAVSK	KFLIDLASGGTAAAVSK	64	29	0.52	9547	33.5184	SFDTKKFLIDLASGGTAAAVSK	KFLIDLASGGTAAAVSK	31.6916	WBGene00006439	ant-1.1	T27E9.1a	Concise description: ant-1.1 encodes one of four C. elegans mitochondrial adenine nucleotide transporters; by homology, ANT-1.1 is predicted to facilitate ADP/ATP exchange between the cytosol and mitochondria; ant-1.1 is an essential gene, required for embryogenesis as well as for normal postembryonic body size and adult lifespan; in addition, ANT-1.1 plays a critical role in promoting somatic an…
173512	WBGene00006924	F56D12.5	H2KYR1	56	6.2769	43	15	0.37	9543	22.5296	KAGEGAADTFGKLVPIKK	EVIPDREEDEVVVIHKAPR	48	19	0.389	9547	25.1388	KAGEGAADTFGKLVPIKK	EVIPDREEDEVVVIHKAPR	23.8342	WBGene00006924	vig-1	F56D12.5a	Concise description: vig-1 encodes a predicted RNA-binding protein orthologous to Drosophila VIG (Vasa Intronic Gene); vig-1 activity is required for proper function of the let-7 miRNA in vivo and thus, for regulating the transition from late larval to adult cell fates; VIG-1 is a component of the 250 kDa RNA-induced silencing complex (RISC) complex and co-immunoprecipates with both TSN-1, the C.…
180603	WBGene00004951	K10B3.10	G4S034	45	6.2309	23	12	0.071	9543	12.0507	ITELKDQLVSSEHQQSPAIEKR	RIDTELASHEPQVSLVK	20	10	0.072	9547	10.4745	RIDTELASHEPQVSLVK	ITELKDQLVSSEHQQSPAIEKR	11.2626	WBGene00004951	spc-1	K10B3.10a	Concise description: spc-1 encodes the C. elegans alpha spectrin ortholog; during development, spc-1 activity is required for body morphogenesis, formation of body wall muscles, locomotion, and larval development. Provisional description: spc-1 encodes the C. elegans alpha spectrin ortholog; during development, spc-1 activity is required for body morphogenesis, formation of body wall muscles, loc…
176007	WBGene00004450	F37C12.4	P49181	63	5.9501	44	13	0.596	9543	23.0535	MSGPGIEGLAVGLNKGHAATQLPVKQR	SGPGIEGLAVGLNKGHAATQLPVKQR	49	15	0.654	9547	25.6625	MSGPGIEGLAVGLNKGHAATQLPVKQR	MSGPGIEGLAVGLNKGHAATQLPVK	24.358	WBGene00004450	rpl-36	F37C12.4	Concise description: rpl-36 encodes a large ribosomal subunit L36 protein; by homology, RPL-36 is predicted to function in protein biosynthesis; in C. elegans, RPL-36 activity is required for embryonic and germline development and normal postembryonic growth rates. Provisional description: rpl-36 encodes a large ribosomal subunit L36 protein; by homology, RPL-36 is predicted to function in protei…
259839	WBGene00006789	F11C3.3	P02566	70	5.9089	68	31	0.236	9543	35.6282	NYQHEAEQLQESLEEEIEGKNEILR	RLEIEKEELQHALDEAEAALEAEESKVLR	58	32	0.246	9547	30.376	NYQHEAEQLQESLEEEIEGKNEILR	DLEEANMNHENQLGGLR	33.0021	WBGene00006789	unc-54	F11C3.3	Concise description: unc-54 encodes a muscle myosin class II heavy chain (MHC B); UNC-54 is the major myosin heavy chain expressed in C. elegans and is required for locomotion and egg-laying; in vivo and in vitro, UNC-54 interacts with ITR-1, an IP3 receptor, and this interaction may provide a link between calcium signaling and the muscle cytoskeleton; UNC-54 is a thick filament component that is…
173058	WBGene00006876	ZK1151.1	G5EFM4	36	5.8698	6	6	0.057	9543	3.14367	GIGITNEKLDLILK	VIHAHKRFEDALQALDSDVANVKELFR	2	2	0.021	9547	1.04745	GIGITNEKLDLILK	SGKRDDVSLHGSDATSAR	2.09556	WBGene00006876	vab-10	ZK1151.1a	Concise description: vab-10 encodes, by alternative splicing, two spectraplakins (VAB-10A and VAB-10B) that are jointly required for mechanical resilience of the epidermis under strain by the contraction of actin microfilaments mechanically linked to fibrous organelles (FOs); VAB-10A/B are, accordingly, required for elongation during embryonic morphogenesis; VAB-10A has C-terminal plectin repeats…
174690	WBGene00000472	F33A8.3	O62213	44	5.8678	20	5	0.188	9543	10.4789	MAEKNDVAEQPADKPVKATK	MAEKNDVAEQPADKPVKAT	19	5	0.221	9547	9.95077	MAEKNDVAEQPADKPVKATK	MAEKNDVAEQPADKPVKAT	10.2148	WBGene00000472	cey-1	F33A8.3	Concise description: cey-1 encodes a protein with a cold-shock/Y-box domain that is expressed in early embryonic blastomeres (at the 15-cell stage, i.e., pre-gastrulation), but is normally repressed in early germline blastomeres by PIE-1. Provisional description: cey-1 encodes a protein with a cold-shock/Y-box domain that is expressed in early embryonic blastomeres (at the 15-cell stage, i.e., pr…
180343	WBGene00004413	B0250.1	Q9XVF7	70	5.8381	61	16	0.546	9543	31.9606	TTVVAAEGMHTGQFIHCGAK	ASGNYATVIAHNPDTKK	62	20	0.565	9547	32.4709	TTVVAAEGMHTGQFIHCGAK	ASGNYATVIAHNPDTKK	32.2157	WBGene00004413	rpl-2	B0250.1	Concise description: rpl-2 encodes a large ribosomal subunit L8 protein. Provisional description: rpl-2 encodes a large ribosomal subunit L8 protein. Detailed description: none available
177503	WBGene00004477	F42C5.8	V6CM07	70	5.8143	61	20	0.615	9543	31.9606	KKNAKLSEEDNAILNKKR	QKTAAVDALLIEQFNTGR	61	19	0.707	9547	31.9472	QKTAAVDALLIEQFNTGR	KKNAKLSEEDNAILNKKR	31.9539	WBGene00004477	rps-8	F42C5.8	Concise description: rps-8 encodes a small ribosomal subunit S8 protein; by homology, RPS-8 is predicted to function in protein biosynthesis; in C. elegans, RPS-8 activity is required for germline development and the overall health of the animal. Provisional description: rps-8 encodes a small ribosomal subunit S8 protein; by homology, RPS-8 is predicted to function in protein biosynthesis; in C. …
172883	WBGene00007708	C25A1.6	Q9XVR8	44	5.7948	10	4	0.5	9543	5.23944	TAPSGEQTLTAHPAR	TAPSGEQTLTAHPARFSPEDKNSKYR	6	2	0.406	9547	3.14235	TAPSGEQTLTAHPAR	FSPEDKNSKYR	4.1909	WBGene00007708	nola-3	C25A1.6	Concise description: none available Provisional description: none available Detailed description: none available
176071	WBGene00004420	R13A5.8	Q95Y90	62	5.7927	47	13	0.413	9543	24.6254	MKLIESNDTVVFPEGVTFTVK	MKLIESNDTVVFPEGVTFTVK	48	16	0.413	9547	25.1388	MKLIESNDTVVFPEGVTFTVK	IQQSTAVKEKDIRK	24.8821	WBGene00004420	rpl-9	R13A5.8	Concise description: rpl-9 encodes a large ribosomal subunit L9 protein that affects fertility and embryonic viability. Provisional description: rpl-9 encodes a large ribosomal subunit L9 protein that affects fertility and embryonic viability. Detailed description: none available
175772	WBGene00018963	F56D2.1	P98080	52	5.7659	33	11	0.291	9543	17.2902	QLSELEAQIQKVDAGAVR	ASSAVSVKDVLASAPQAEVTTLK	33	14	0.293	9547	17.2829	ASSAVSVKDVLASAPQAEVTTLK	QLSELEAQIQKVDAGAVR	17.2865	WBGene00018963	ucr-1	F56D2.1	Concise description: none available Provisional description: none available Detailed description: none available
177203	WBGene00004419	Y24D9A.4	Q966C6	64	5.7286	47	16	0.389	9543	24.6254	AQTQVQKEVKNPLFEKR	AQTQVQKEVKNPLFEK	52	18	0.434	9547	27.2337	AQTQVQKEVKNPLFEKR	AQTQVQKEVKNPLFEK	25.9295	WBGene00004419	rpl-7A	Y24D9A.4a	Concise description: rpl-7A encodes a large ribosomal subunit L7a protein required in mass RNAi assays for fertility, vulval development, and general health; the rpl-7A transcription unit has one nonsense transcript that is up-regulated in vivo by smg[-] mutations, indicating that rpl-7A is a natural substrate for SMG-mediated nonsense suppresssion; several other natural mRNA substrates of SMG su…
177295	WBGene00006586	W03F8.1	O44572	33	5.6942	7	4	0.289	9543	3.66761	AAEDLKQQQMLKEQER	IIPLPDLDNEDDLEAVYDEIRER	6	3	0.247	9547	3.14235	AAEDLKQQQMLKEQER	IIPLPDLDNEDDLEAVYDEIRER	3.40498	WBGene00006586	tni-4	W03F8.1	Concise description: tni-4 encodes one of the four elegans troponin I proteins; tni-4 is required for the normal development of the pharynx during embryonic development; TNI-4 interacts only with the pharyngeal troponin C; tni-4 is expressed exclusively in the pharyngeal muscles. Provisional description: tni-4 encodes one of the four elegans troponin I proteins; tni-4 is required for the normal d…
171834	WBGene00004920	Y71F9B.4	Q9N4G9	12	5.6414								8	3	0.299	9547	4.1898	MSKTHPPELKK	GNSVVIMEPKER	2.0949	WBGene00004920	snr-7	Y71F9B.4	Concise description: snr-7 encodes the C. elegans ortholog of the small nuclear ribonucleoprotein G, one of seven subunits of the heptameric Sm complex required for the biogenesis and function of snRNPs that catalyze mRNA splicing; in addition to its predicted role in pre-mRNA processing, SNR-7 activity is essential for embryogenesis and for several aspects of germ cell specification including lo…
174166	WBGene00004447	F10E7.7	P49180	51	5.592	23	8	0.508	9543	12.0507	AKFHHNIPPSALGK	AKFHHNIPPSALGKR	22	7	0.29	9547	11.5219	AKFHHNIPPSALGK	FHHNIPPSALGK	11.7863	WBGene00004447	rpl-33	F10E7.7	Concise description: rpl-33 encodes a large ribosomal subunit L35a protein. Provisional description: rpl-33 encodes a large ribosomal subunit L35a protein. Detailed description: none available
178458	WBGene00004357	Y51H4A.3	Q22038	31	5.5887	6	3	0.135	9543	3.14367	MKQEPVKPEQGR	MKQEPVKPEQGR	6	2	0.062	9547	3.14235	MKQEPVKPEQGR	MKQEPVKPEQGR	3.14301	WBGene00004357	rho-1	Y51H4A.3	Concise description: rho-1 encodes a Rho GTPase; rho-1 activity is required for regulation of a number of actin filament-based processes including embryonic polarity, cell migration, cell shape changes, muscle contraction, and neurite outgrowth; in addition, RHO-1 is required for both DGK-1- and UNC-13-dependent and independent regulation of synaptic signaling at neuromuscular junctions; as RHO-1…
171766	WBGene00004409	Y37E3.7	P91913	70	5.546	57	19	0.73	9543	29.8648	ALEGVDVKNLITSVSSGAGSGPAPAAAAAAPAAGGAAPAAETK	NLITSVSSGAGSGPAPAAAAAAPAAGGAAPAAETK	54	16	0.73	9547	28.2811	ALEGVDVKNLITSVSSGAGSGPAPAAAAAAPAAGGAAPAAETK	NLITSVSSGAGSGPAPAAAAAAPAAGGAAPAAETK	29.0729	WBGene00004409	rla-1	Y37E3.7	Concise description: rla-1 encodes an acidic ribosomal subunit protein P1. Provisional description: rla-1 encodes an acidic ribosomal subunit protein P1. Detailed description: none available
178735	WBGene00021562	Y45G12B.1	Q86S76	33	5.5016	6	3	0.055	9543	3.14367	KAAIENKTNPYAEEPVYAR	SLPYSDLKEIR	6	4	0.071	9547	3.14235	KAAIENKTNPYAEEPVYAR	SLPYSDLKEIR	3.14301	WBGene00021562	nuo-5	Y45G12B.1a	Concise description: nuo-5 is orthologous to human NADH-UBIQUINONE OXIDOREDUCTASE Fe-S PROTEIN 1 (NDUFS1; OMIM:157655), which when mutated leads to mitochondrial complex I deficiency. Provisional description: nuo-5 is orthologous to human NADH-UBIQUINONE OXIDOREDUCTASE Fe-S PROTEIN 1 (NDUFS1; OMIM:157655), which when mutated leads to mitochondrial complex I deficiency. Detailed description: none …
175714	WBGene00003588	ZC155.1	G5EEA8	31	5.5011	7	5	0.171	9543	3.66761	ALRAGEKDAVVNVITSISNAQR	SIEKEFSGDLQK	3	2	0.068	9547	1.57117	SIEKEFSGDLQK	APMFAEKIDR	2.61939	WBGene00003588	nex-1	ZC155.1	Concise description: nex-1 encodes an annexin, a member of a family of calcium-dependent phospholipid binding proteins; NEX-1 is required for efficient engulfment of apoptotic cell corpses in the pharynx, and may also function in other membrane fusion events, such as exocytosis; NEX-1 in vitro can bind phosphatidylserine, phosphatidylinositol, heparin, heparan sulfate, and chondroitin sulfate; NE…
173319	WBGene00002978	Y105E8B.1	K8FDX2	70	5.4867	63	19	0.616	9543	33.0085	IATEKLEEATHNVDESER	EVDRLEDELVHEKER	24	6	0.215	9547	12.5694	SLEVSEEKALQREDSYEEQIR	ALQREDSYEEQIR	22.7889	WBGene00002978	lev-11	Y105E8B.1a	Concise description: lev-11 encodes tropomyosin, an actin-binding contractile structural protein orthologous to human TROPOMYOSIN 1 (TPM1; OMIM:191010), which when mutated leads to familial hypertrophic cardiomyopathy; LEV-11 is required for embryonic development, normal body morphology, and locomotion; expressed as multiple tissue-specific isoforms generated by alternative mRNA splicing and prom…
176006	WBGene00004483	F37C12.9	P48150	72	5.4865	21	7	0.507	9543	11.0028	AKEEQAVVSLGPQAK	GKAKEEQAVVSLGPQAK	26	10	0.507	9547	13.6168	GKAKEEQAVVSLGPQAK	AKEEQAVVSLGPQAK	12.3098	WBGene00004483	rps-14	F37C12.9	Concise description: rps-14 encodes a small ribosomal subunit S14 protein; by homology, RPS-14 is predicted to function in protein biosynthesis; in C. elegans, RPS-14 activity is required for embryonic and germline development, as well as the overall health of the animal; RPS-14 co-immuoprecipitates with ALG-1, a C. elegans Argonaut ortholog. Provisional description: rps-14 encodes a small riboso…
173260	WBGene00004475	Y71A12B.1	I2HAF8	68	5.4459	53	16	0.565	9543	27.769	FNLTKHDDVTKYVITHDKTFPDGVTK	MSQEVAIDALGDEWKGYVVR	48	15	0.455	9547	25.1388	FNLTKHDDVTKYVITHDKTFPDGVTK	MSQEVAIDALGDEWKGYVVR	26.4539	WBGene00004475	rps-6	Y71A12B.1a	Concise description: rps-6 encodes a small (40S) ribosomal subunit S6 protein; loss of rps-6 activity in adult animals extends lifespan. Provisional description: rps-6 encodes a small (40S) ribosomal subunit S6 protein; loss of rps-6 activity in adult animals extends lifespan. Detailed description: none available
181617	WBGene00010357	H03A11.2	H03A11.2	40	5.4381	7	2	0.025	9543	3.66761	TQNQEDFTHISGERYAK	TQNQEDFTHISGER	5	2	0.025	9547	2.61862	TQNQEDFTHISGERYAK	TQNQEDFTHISGER	3.14311	WBGene00010357	H03A11.2	H03A11.2	Concise description: none available Provisional description: none available Detailed description: none available
172401	WBGene00016493	C37A2.7	O01504	63	5.4364	41	14	0.738	9543	21.4817	LSSVPSGGSAPAAAAPSGGAAPKAEEK	VKLSSVPSGGSAPAAAAPSGGAAPKAEEK	39	12	0.738	9547	20.4253	VKLSSVPSGGSAPAAAAPSGGAAPKAEEK	VLEAGGLDCDMENANSVVDALKGK	20.9535	WBGene00016493	C37A2.7	C37A2.7	Concise description: none available Provisional description: none available Detailed description: none available
172692	WBGene00009454	F36A2.7	F36A2.7	30	5.4113	4	3	0.138	9543	2.09578	ASSGLTLKHEQTIK	ASSGLTLKHEQTIKINDQQGFFK	5	4	0.156	9547	2.61862	ASSGLTLKHEQTIKINDQQGFFK	SGLTLKHEQTIK	2.3572	WBGene00009454	F36A2.7	F36A2.7	Concise description: none available Provisional description: none available Detailed description: none available
174467	WBGene00000170	C01G6.1	Q17571	28	5.3666	3	2	0.069	9543	1.57183	TGNQELKPLTAKETVDEEAA	TGNQELKPLTAKETVDEEAA	4	3	0.069	9547	2.0949	TGNQELKPLTAKETVDEEAA	TGNQELKPLTAKETVDEEAA	1.83336	WBGene00000170	aqp-2	C01G6.1a	Concise description: aqp-2 encodes, by alternative splicing, two isoforms of an biochemically atypical aquaglyceroporin; when expressed in Xenopus oocytes, AQP-2 increases water permeability 5- to 11-fold, and urea permeability 4.5-fold, but has no effect on glycerol permeability; AQP-2::GFP fusion proteins are expressed predominantly in the excretory cell and more weakly in muscle, motor neurons…
171965	WBGene00020185	T03F1.3	P91427	32	5.3616	5	3	0.113	9543	2.61972	YHLEEEGKGVDASGAK	AHSSMVGVEHSQR	5	4	0.153	9547	2.61862	YHLEEEGKGVDASGAK	MSSLNKLAIDQLNLAGKR	2.61917	WBGene00020185	pgk-1	T03F1.3	Concise description: pgk-1 encodes a protein that is orthologous to human PHOSPHOGLYCERETE KINASE 1 (PGK1; OMIM:311800), which when mutated leads to hemolytic anemia and neurologic disturbances. Provisional description: pgk-1 encodes a protein that is orthologous to human PHOSPHOGLYCERETE KINASE 1 (PGK1; OMIM:311800), which when mutated leads to hemolytic anemia and neurologic disturbances. Detai…
181698	WBGene00003485	W10G6.3	O02365	53	5.3242	15	9	0.219	9543	7.85916	VQEINTQSNRQNAENNYQKEEVKR	GFETELKELQAQAAR	10	5	0.139	9547	5.23725	VQEINTQSNRQNAENNYQKEEVKR	TVTSSSQNYGAPGSGNR	6.54821	WBGene00003485	mua-6	W10G6.3	Concise description: mua-6 encodes an essential intermediate filament protein (MUA-6/IFA-2) that is coexpressed with the essential IF protein IFB-1; MUA-6 is required for hypodermal integrity and for lasting attachment of muscles to the body wall; MUA-6 is also required for normal positioning of excretory canals and muscles; MUA-6 forms heteropolymeric intermediate filaments in vitro with an equi…
174090	WBGene00002045	C56C10.8	Q18885	50	5.2944	15	9	0.404	9543	7.85916	TAAADDKKLQSNLKK	LGPDGKGEDEDVPELVGDFDAASKNETKADEQ	9	6	0.342	9547	4.71352	TAAADDKKLQSNLKK	LGPDGKGEDEDVPELVGDFDAASKNETKADEQ	6.28634	WBGene00002045	icd-1	C56C10.8	Concise description: icd-1 encodes the C. elegans ortholog of the beta-subunit of the nascent polypeptide-associated complex (betaNAC); during development, icd-1 activity is required for prevention of ced-4-dependent, but ced-3-independent, programmed cell death and for normal embryonic development; ICD-1 is widely expressed throughout development and colocalizes primarily with mitochondria. Prov…
173992	WBGene00002268	ZK1248.16	G5EFI4	27	5.2868	4	2	0.083	9543	2.09578	QGDASDPKETNYKK	FIGEQEYKLPFK	3	1	0.045	9547	1.57117	QGDASDPKETNYKK	NA	1.83347	WBGene00002268	lec-5	ZK1248.16	Concise description: none available Provisional description: none available Detailed description: none available
178783	WBGene00019097	F59B1.2	F59B1.2	33	5.2834	4	2	0.286	9543	2.09578	ELASAQAALDAENAPVVNAHHAQAQHVEPVDNQ	AVQAADYVEQLRR	4	1	0.205	9547	2.0949	ELASAQAALDAENAPVVNAHHAQAQHVEPVDNQ	NA	2.09534	WBGene00019097	F59B1.2	F59B1.2	Concise description: none available Provisional description: none available Detailed description: none available
179796	WBGene00001137	B0365.3	P90735	46	5.24	14	4	0.046	9543	7.33522	SVGIISDGTETVEDIAIRR	KFTELTQGNVIAVR	17	8	0.089	9547	8.90332	SVGIISDGTETVEDIAIRR	SVGIISDGTETVEDIAIR	8.11927	WBGene00001137	eat-6	B0365.3	Concise description: eat-6 encodes an ortholog of the alpha subunit of a sodium/potassium ATPase, which in turn affects Na+,K(+)-ATPase activity of membranes by affecting the level of the phosphorylated intermediate of the Na+,K(+)-ATPase; EAT-6 affects relaxation of the pharyngeal muscles, fertility (and thus affects feeding); EAT-6 also affects body length, life span, and ASE, ASI and ASJ axona…
172062	WBGene00004436	D1007.12	O01868	57	5.163	8	4	0.138	9543	4.19155	AVAGLSLDAILAKR	GLSLDAILAKR	13	5	0.138	9547	6.80842	AVAGLSLDAILAKR	RNQTEDFRR	5.49998	WBGene00004436	rpl-24.1	D1007.12	Concise description: rpl-24.1 encodes a large ribosomal subunit L24 protein. Provisional description: rpl-24.1 encodes a large ribosomal subunit L24 protein. Detailed description: none available
174367	WBGene00002065	F54C9.1	Q20751	59	5.1501	33	5	0.373	9543	17.2902	MSDDHHDDEHFHTGDSGAAATFPKQCSALR	MSDDHHDDEHFHTGDSGAAATFPK	35	5	0.385	9547	18.3304	KLEDICPSTHNMDVPVVK	MSDDHHDDEHFHTGDSGAAATFPKQCSALR	17.8103	WBGene00002065	iff-2	F54C9.1	Concise description: none available Provisional description: none available Detailed description: none available
176707	WBGene00012553	Y37D8A.14	P55954	35	5.0584	6	4	0.184	9543	3.14367	ALSELHDYDVIPDPK	ALSELHDYDVIPDPKVVEAALR	8	3	0.184	9547	4.1898	ALSELHDYDVIPDPKVVEAALR	ALSELHDYDVIPDPK	3.66674	WBGene00012553	cco-2	Y37D8A.14	Concise description: cco-2 encodes the C. elegans ortholog of the cytochrome c oxidase (COX) subunit Va (COX Va); loss of cco-2 activity via RNAi results in a shortened life span, reduced fertility, and defects in mitochondrial respiratory chain function. Provisional description: cco-2 encodes the C. elegans ortholog of the cytochrome c oxidase (COX) subunit Va (COX Va); loss of cco-2 activity vi…
176015	WBGene00004417	R151.3	P47991	57	5.0283	25	11	0.387	9543	13.0986	TVDAPILAAIKKHPEHK	TVDAPILAAIKKHPEHKFLFGYLGTR	31	15	0.433	9547	16.2355	TVDAPILAAIKKHPEHK	TVDAPILAAIKKHPEHKFLFGYLGTR	14.667	WBGene00004417	rpl-6	R151.3	Concise description: rpl-6 encodes a large ribosomal subunit L6 protein. Provisional description: rpl-6 encodes a large ribosomal subunit L6 protein. Detailed description: none available
180535	WBGene00004423	F07D10.1	Q19162	35	5.0278	8	4	0.143	9543	4.19155	MGDIEKQTEIREKK	MGDIEKQTEIREK	6	3	0.143	9547	3.14235	MGDIEKQTEIREK	VLEQLTGQTPVFSK	3.66695	WBGene00004423	rpl-11.2	F07D10.1	Concise description: rpl-11.2 encodes a large ribosomal subunit L11 protein; by homology, RPL-11.2 is predicted to function in protein biosynthesis. Provisional description: This gene encodes a protein predicted by Eisenberg and coworkers, with 52 percentage accuracy, to be mitochondrial. Detailed description: none available
173071	WBGene00011156	R09B3.3	R09B3.3	60	5.0245	15	4	0.459	9543	7.85916	GFAFVEFTEEAAAQR	AVDQFNGVDFNGR	13	3	0.459	9547	6.80842	GFAFVEFTEEAAAQR	AVDQFNGVDFNGR	7.33379	WBGene00011156	R09B3.3	R09B3.3	Concise description: none available Provisional description: none available Detailed description: none available
172743	WBGene00001167	F25H5.4	P29691	72	5.0144	47	18	0.183	9543	24.6254	NMSVIAHVDHGKSTLTDSLVSK	AKILAEKYEYDVTEAR	49	20	0.223	9547	25.6625	NMSVIAHVDHGKSTLTDSLVSK	SVIAHVDHGKSTLTDSLVSK	25.144	WBGene00001167	eef-2	F25H5.4a	Concise description: eef-2 encodes a homolog of translation elongation factor 2 (EF-2), a GTP-binding protein essential for the elongation phase of protein synthesis; eef-2 is required for embryogenesis and vulval morphogenesis, and is expressed during all stages of development, including the dauer larval stage. Provisional description: eef-2 encodes a homolog of translation elongation factor 2 (…
174964	WBGene00002264	W09H1.6	O45904	51	5.0057	23	7	0.358	9543	12.0507	SVLQEKFEPGQTLIVK	TADFSGNDVPLHVSVR	25	10	0.459	9547	13.0931	SVLQEKFEPGQTLIVK	TADFSGNDVPLHVSVR	12.5719	WBGene00002264	lec-1	W09H1.6a	Concise description: lec-1 encodes a tandem repeat-type galectin in which each galectin domain is homologous to typical vertebrate 14-kDa-type galectins; the two sugar binding sites have distinct sugar binding properties in vitro and lec-1 is expressed most abundantly in the adult cuticle. Provisional description: lec-1 encodes a tandem repeat-type galectin in which each galectin domain is homolo…
178173	WBGene00004448	C42C1.14	A3QMC5	54	4.9389	24	8	0.4	9543	12.5747	AFLVEEQKIVNKVIKHQKD	AFLVEEQKIVNKVIK	23	7	0.382	9547	12.0457	AFLVEEQKIVNKVIKHQKD	AFLVEEQKIVNKVIK	12.3102	WBGene00004448	rpl-34	C42C1.14	Concise description: rpl-34 encodes a putative large ribosomal subunit L34 protein that inhibits DHC-1 in vivo; RPL-34 is expressed in most somatic tissues of larvae and adults; in mass RNAi assays, RPL-34 is required for embryonic and larval development, normally rapid growth, and normal body coloration. Provisional description: rpl-34 encodes a putative large ribosomal subunit L34 protein that …
180880	WBGene00002007	C15H9.6	V6CJ24	69	4.8062	39	14	0.207	9543	20.4338	LYKDAGAGGEEAPEEGSDDKDEL	VLEDSDLKKDDVHEIVLVGGSTR	42	13	0.248	9547	21.9964	LYKDAGAGGEEAPEEGSDDKDEL	VLEDSDLKKDDVHEIVLVGGSTR	21.2151	WBGene00002007	hsp-3	C15H9.6	Concise description: hsp-3 encodes one of two C. elegans heat shock response 70 (hsp70) proteins homologous to mammalian grp78/BiP (glucose regulated protein 78/immunoglobulin heavy chain-binding protein, OMIM:138120); HSP-3 likely functions as a molecular chaperone, and is expressed constitutively (expression is not heat inducible) throughout development with greatest abundance during the L1 lar…
174034	WBGene00004015	T24H7.1	P50093	40	4.806	10	5	0.293	9543	5.23944	IVQAEGEAESAKLLGEAMKNDPGFLK	IGGLSTDLYKEGLHFR	10	3	0.238	9547	5.23725	IVQAEGEAESAKLLGEAMKNDPGFLK	MAKQGQEAMKK	5.23834	WBGene00004015	phb-2	T24H7.1	Concise description: phb-2 encodes the C. elegans ortholog of prohibitin PHB2; loss of phb-2 activity via RNAi indicates that phb-2 function is required for mitochondrial organization and morphology and for embryonic, germline, and somatic gonad development; PHB-2, along with prohibitin subunit PHB-1, forms a macromolecular complex that localizes to mitochondrial membranes; PHB-1 and PHB-2 are de…
175316	WBGene00002025	Y22D7AL.5	G8JYF5	61	4.7564	30	13	0.282	9543	15.7183	LIQDVANKANEEAGDGTTCATVLAR	SIDLKDKYQNLGAK	32	14	0.282	9547	16.7592	SIDLKDKYQNLGAK	AANEDQQIGVNIVKK	16.2387	WBGene00002025	hsp-60	Y22D7AL.5a	Concise description: hsp-60 encodes a nuclear-encoded mitochondrion-specific chaperone that is a member of the GroE/Hsp10/60 superfamily of molecular chaperones; hsp-60 is involved in the mitochondrial unfolded protein response, as hsp-60 expression, normally broadly detected during development, is greatly increased in response to treatments that disrupt mitochondrial protein handling; loss of hs…
172216	WBGene00006919	F46F11.5	P91303	63	4.7517	33	12	0.794	9543	17.2902	TKQAKQEAQAEVEKYKQQR	MASQTQGIQQLLAAEKR	33	12	0.651	9547	17.2829	TKQAKQEAQAEVEKYKQQR	MASQTQGIQQLLAAEKR	17.2865	WBGene00006919	vha-10	F46F11.5	Concise description: vha-10 encodes an ortholog of subunit G of the cytoplasmic (V1) domain of vacuolar proton-translocating ATPase (V-ATPase); VHA-10 is required for necrosis, since vha-10(RNAi) suppresses necrotic neurodegeneration and thapsigargin-induced cell death; VHA-10 is a predicted cytosolic stator (stalk) component. Provisional description: vha-10 encodes an ortholog of subunit G of th…
175584	WBGene00004470	F56F3.5	P48154	69	4.7466	40	9	0.424	9543	20.9578	LHDLHGDSITVGADGEKVDRPDDYEPPVQQEV	VDLGRLHDLHGDSITVGADGEKVDRPDDYEPPVQQEV	39	10	0.514	9547	20.4253	LHDLHGDSITVGADGEKVDRPDDYEPPVQQEV	VDLGRLHDLHGDSITVGADGEKVDRPDDYEPPVQQEV	20.6915	WBGene00004470	rps-1	F56F3.5	Concise description: rps-1 encodes a small ribosomal subunit S3A protein. Provisional description: rps-1 encodes a small ribosomal subunit S3A protein. Detailed description: none available
178014	WBGene00011480	T05E11.3	Q22235	45	4.7314	13	5	0.088	9543	6.81128	RVTASEEDTTAASTAK	SKAEKHEFQAEVNR	15	6	0.088	9547	7.85587	SKAEKHEFQAEVNR	RVTASEEDTTAASTAK	7.33357	WBGene00011480	enpl-1	T05E11.3a	Concise description: T05E11.3 encodes the C. elegans ortholog of the Hsp90 family member and endoplasmic reticulum (ER) chaperone GRP94/GP96; loss of T05E11.3 activity via RNAi results in slow growth, larval arrest, uncoordinated locomotion, and weak endocytosis defects; in addition, loss of T05E11.3 expression results in an increase in hsp-4 expression, revealing compensatory regulation amongst …
172313	WBGene00004486	T08B2.10	O01692	70	4.7083	40	15	0.523	9543	20.9578	MTNDFHNNKRVCDEVAIIGSKPLR	VCDEVAIIGSKPLR	40	16	0.623	9547	20.949	VCDEVAIIGSKPLR	AAGFNLPNVTVEDQGKNKGK	20.9534	WBGene00004486	rps-17	T08B2.10	Concise description: rps-17 encodes a small ribosomal subunit S17 protein. Provisional description: rps-17 encodes a small ribosomal subunit S17 protein. Detailed description: none available
178342	WBGene00004430	Y45F10D.12	O45946	67	4.6666	34	11	0.59	9543	17.8141	AVQKAGNENKTVVTLSTVTDDARLYTVPK	ILAAGGEIITLDQLALKSPKGENTVFLQGPR	38	12	0.59	9547	19.9015	ILAAGGEIITLDQLALKSPKGENTVFLQGPR	AVQKAGNENKTVVTLSTVTDDARLYTVPK	18.8578	WBGene00004430	rpl-18	Y45F10D.12	Concise description: rpl-18 encodes a large ribosomal subunit L18 protein. Provisional description: rpl-18 encodes a large ribosomal subunit L18 protein. Detailed description: none available
176512	WBGene00004736	K11D9.2	G5EEK8	46	4.638	15	5	0.072	9543	7.85916	AKELVPGDLVEVSVGDKIPADLR	SGHHGIQMVR	15	5	0.074	9547	7.85587	AKELVPGDLVEVSVGDKIPADLR	AVNQDKKNCLFSGTNVASGK	7.85752	WBGene00004736	sca-1	K11D9.2a	Concise description: The sca-1 gene encodes a sarco-endoplasmic reticulum Ca[2+] ATPase homolog that is required for development and muscle function; sca-1 is also a ortholog of human ATP2A1 (OMIM:108730), which when mutated leads to Darier-White disease (OMIM:124200). Provisional description: The sca-1 gene encodes a sarco-endoplasmic reticulum Ca[2+] ATPase homolog that is required for developm…
172070	WBGene00016653	C44E4.4	C44E4.4	39	4.6372	8	4	0.126	9543	4.19155	MGETAAAVHDDADQKIIK	GETAAAVHDDADQKIIK	8	5	0.182	9547	4.1898	MGETAAAVHDDADQKIIK	SAKNTSEAIESEKAQHAVRYEK	4.19067	WBGene00016653	C44E4.4	C44E4.4	Concise description: none available Provisional description: none available Detailed description: none available
172617	WBGene00004439	F52B5.6	Q20647	60	4.5959	33	16	0.651	9543	17.2902	KIEDHNTLVFIVDEKANKHHIKR	APSSNKVGKAIQAK	23	12	0.596	9547	12.0457	KSAPARDKLDSFAVIKAPHTTESSMK	APSSNKVGKAIQAK	14.6679	WBGene00004439	rpl-25.2	F52B5.6	Concise description: rpl-25.2 encodes a large ribosomal subunit L23a protein. Provisional description: rpl-25.2 encodes a large ribosomal subunit L23a protein. Detailed description: none available
178710	WBGene00017490	F15E11.1	G5EBF3	35	4.5917	3	2	0.156	9543	1.57183	SGTSTTDFYRHDV	VLEKEVQFVSK	6	3	0.156	9547	3.14235	SGTSTTDFYRHDV	SGTSTTDFYRHDV	2.35709	WBGene00017490	F15E11.1	F15E11.1	Concise description: F15E11.1, along with F15E11.14, encodes a 17.4 kDa protein (CE16999) with unknown function that is seven-fold more abundant in glp-1 mutant hermaphrodites (which lack a germline) than in normal hermaphrodites; in addition, the protein products of F15E11.1/F15E11.14 are more abundant in daf-2 mutant vs. wild-type adults during a temperature shift from 15 to 25 degrees C; F15E1…
171602	WBGene00004418	F53G12.10	O01802	67	4.5684	35	10	0.324	9543	18.338	KTNHFVEGGDFGNREDQINNLLR	APTKKVPQVPETVLK	34	9	0.205	9547	17.8066	KTNHFVEGGDFGNREDQINNLLR	APTKKVPQVPETVLK	18.0723	WBGene00004418	rpl-7	F53G12.10	Concise description: rpl-7 encodes a large ribosomal subunit L7 protein required in mass RNAi assays for embryonic viability and normally rapid growth. Provisional description: rpl-7 encodes a large ribosomal subunit L7 protein required in mass RNAi assays for embryonic viability and normally rapid growth. Detailed description: none available
179025	WBGene00020275	T05H4.12	O16517	51	4.5288	17	8	0.473	9543	8.90705	ALQEELNRLATK	ASLLEGVKKDHSEYVASR	17	8	0.465	9547	8.90332	ALQEELNRLATK	SLLEGVKKDHSEYVASR	8.90518	WBGene00020275	atp-4	T05H4.12	Concise description: none available Provisional description: none available Detailed description: none available
172074	WBGene00004415	B0041.4	O02056	70	4.4355	36	12	0.293	9543	18.862	GHVIDQVAEVPLVVSDKVESFRK	TPIRPDLVSFIADQVRR	35	13	0.342	9547	18.3304	TPIRPDLVSFIADQVRR	GHVIDQVAEVPLVVSDKVESFRK	18.5962	WBGene00004415	rpl-4	B0041.4	Concise description: rpl-4 encodes a large ribosomal subunit L4 protein. Provisional description: rpl-4 encodes a large ribosomal subunit L4 protein. Detailed description: none available
171854	WBGene00022114	Y71F9AL.9	Y71F9AL.9	53	4.4286	17	8	0.36	9543	8.90705	SAAAPKPVVSAPAPADPLSTAFK	SKKTETAAPETTQSAPAPAK	15	6	0.312	9547	7.85587	SAAAPKPVVSAPAPADPLSTAFK	LALNDREKELKQSNASQFDTSTILK	8.38146	WBGene00022114	Y71F9AL.9	Y71F9AL.9	Concise description: none available Provisional description: none available Detailed description: none available
181168	WBGene00016006	C23F12.1	A0A0K3AVH8	12	4.4151	3	3	0.006	9543	1.57183	TTTTTEYENIDKKPNVPK	RIHILK								0.785915	WBGene00016006	fln-2	C23F12.1a	Concise description: none available Provisional description: none available Detailed description: none available
178130	WBGene00014095	ZK829.4	Q23621	70	4.3726	36	12	0.233	9543	18.862	IAGASEKDIVHSGLEYTMQR	IAGASEKDIVHSGLEYTMQR	33	16	0.302	9547	17.2829	IAGASEKDIVHSGLEYTMQR	AATLDAHSQVLDEQKPMEEQVNPSFYK	18.0724	WBGene00014095	gdh-1	ZK829.4	Concise description: gdh-1 encodes a glutamate dehydrogenase, required in mass RNAi assays for normal fertility and rapid growth, that is expressed in larval and adult pharynx, intestine, and rectal gland cells; GDH-1 is orthologous to human GLUD1 (OMIM:138130, mutated in hyperinsulinemic hypoglycemia and hyperammonemia) and GLUD2 (OMIM:300144). Provisional description: gdh-1 encodes a glutamate …
174543	WBGene00007463	C08H9.2	B3GWB2	52	4.3682	18	10	0.095	9543	9.431	SFGSTSEESKKAQAIATATK	EIDIPKDHHGR	20	10	0.109	9547	10.4745	SFGSTSEESKKAQAIATATK	EIDIPKDHHGR	9.95275	WBGene00007463	C08H9.2	C08H9.2a	Concise description: none available Provisional description: none available Detailed description: none available
172939	WBGene00009119	F25H2.5	Q93576	63	4.3526	24	9	0.301	9543	12.5747	SMLGATNPLASAPGTIR	SMLGATNPLASAPGTIR	26	9	0.392	9547	13.6168	SMLGATNPLASAPGTIR	SMLGATNPLASAPGTIR	13.0958	WBGene00009119	ndk-1	F25H2.5	Concise description: none available Provisional description: none available Detailed description: none available
177481	WBGene00004473	Y43B11AR.4	Q9N3X2	67	4.2954	28	11	0.425	9543	14.6704	LPGASDIIHIKDSAGHSFATR	ITDSVKFEPGNLAYVTGGR	33	12	0.378	9547	17.2829	ERLPGASDIIHIKDSAGHSFATR	LPGASDIIHIKDSAGHSFATR	15.9766	WBGene00004473	rps-4	Y43B11AR.4	Concise description: rps-4 encodes a small ribosomal subunit S4 protein. Provisional description: rps-4 encodes a small ribosomal subunit S4 protein. Detailed description: none available
179971	WBGene00000915	C47E8.5	Q18688	65	4.2772	20	9	0.108	9543	10.4789	IVMHIKEDQIDFLEER	IVMHIKEDQIDFLEER	25	11	0.135	9547	13.0931	IVMHIKEDQIDFLEER	IVMHIKEDQIDFLEER	11.786	WBGene00000915	daf-21	C47E8.5	Concise description: daf-21 encodes a member of the Hsp90 family of molecular chaperones; DAF-21 activity is required for larval development, negative regulation of dauer larva formation, and a number of specific chemosensory behaviors, such as the response to chemicals and odorants detected by the ASE and AWC sensory neurons; a daf-21 sensory defect can be rescued by a cyclic GMP analogue, sugge…
178297	WBGene00004410	Y62E10A.1	Q9U1X9	58	4.2317	13	5	0.345	9543	6.81128	AVLGGNANPKVDDLKNILSAVGVDADAETAKLVVSR	VDDLKNILSAVGVDADAETAKLVVSR	9	4	0.327	9547	4.71352	AVLGGNANPKVDDLKNILSAVGVDADAETAKLVVSR	AVGVDADAETAKLVVSR	5.7624	WBGene00004410	rla-2	Y62E10A.1	Concise description: rla-2 encodes an acidic ribosomal subunit protein P2. Provisional description: rla-2 encodes an acidic ribosomal subunit protein P2. Detailed description: none available
174560	WBGene00002265	F52H3.7	G5EGB1	50	4.1583	16	7	0.245	9543	8.38311	TADFSGNDVPLHVSVR	SKLVEPFEPGQTLIVK	15	6	0.245	9547	7.85587	TADFSGNDVPLHVSVR	KSNPYKKGDDIDIR	8.11949	WBGene00002265	lec-2	F52H3.7a	Concise description: lec-2 encodes a 'tandem repeat' type galectin (beta-galactosyl-binding lectin) containing two, tandemly arranged carbohydrate recognition domains; by homology, LEC-2 may play roles in cell adhesion and aggregation, proliferation, or programmed cell death. Provisional description: lec-2 encodes a 'tandem repeat' type galectin (beta-galactosyl-binding lectin) containing two, ta…
180748	WBGene00004438	F55D10.2	P48162	58	4.1582	20	11	0.333	9543	10.4789	TADYDALDVANKIGVI	IIQHPLTTESAMK	20	9	0.286	9547	10.4745	LTADYDALDVANKIGV	TADYDALDVANKIGVI	10.4767	WBGene00004438	rpl-25.1	F55D10.2	Concise description: rpl-25.1 encodes a large ribosomal subunit L23a protein. Provisional description: rpl-25.1 encodes a large ribosomal subunit L23a protein. Detailed description: none available
171692	WBGene00004429	Y48G8AL.8	Q9BL19	66	4.1568	6	2	0.208	9543	3.14367	AQAFLNHVKEHKEIVPFRR	TKVHYSRAPENSTK	6	2	0.208	9547	3.14235	AQAFLNHVKEHKEIVPFRR	TKVHYSRAPENSTK	3.14301	WBGene00004429	rpl-17	Y48G8AL.8a	Concise description: rpl-17 encodes a large ribosomal subunit L17 protein; by homology, RPL-17 is predicted to function in protein biosynthesis; in C. elegans, RPL-17 activity is required for embryonic and germline development, as well as normal postembryonic growth rates. Provisional description: rpl-17 encodes a large ribosomal subunit L17 protein; by homology, RPL-17 is predicted to function i…
174803	WBGene00001679	F13D12.7	D1MN68	30	4.0949	2	2	0.115	9543	1.04789	KSANDTTLATVASNLEPIGR	MSELDQLRQEAEQLKSQIR	3	2	0.115	9547	1.57117	KSANDTTLATVASNLEPIGR	MSELDQLRQEAEQLKSQIR	1.30953	WBGene00001679	gpb-1	F13D12.7a	Concise description: gpb-1 encodes a heterotrimeric G protein beta subunit that is required during embryonic development for the proper orientation of the mitotic spindle during early cell divisions and thus affects the orientation of early cell division axes, and is also required for larval viability, negatively regulates locomotion and egg-laying, and may affect germline development and osmotic…
174443	WBGene00004446	T24B8.1	B7WN95	65	4.0484	23	13	0.5	9543	12.0507	VLVQNVKDLDMLLMQSYK	KYIGEIGHGVSAK	28	16	0.47	9547	14.6643	KYIGEIGHGVSAK	IGEIGHGVSAK	13.3575	WBGene00004446	rpl-32	T24B8.1a	Concise description: rpl-32 encodes a large ribosomal subunit L32 protein. Provisional description: rpl-32 encodes a large ribosomal subunit L32 protein. Detailed description: none available
174141	WBGene00004930	C15F1.7	P34697	38	4.0214	4	2	0.304	9543	2.09578	HVGDLGNVEAGADGVAK	SMVVHAGQDDLGEGVGDKAEESKKTGNAGAR	7	3	0.304	9547	3.66607	HVGDLGNVEAGADGVAK	SMVVHAGQDDLGEGVGDKAEESKKTGNAGAR	2.88092	WBGene00004930	sod-1	C15F1.7a	Concise description: sod-1 encodes the copper/zinc superoxide dismustase, an enzyme that is known to protect cells from oxidative damage; superoxide dismutase activity can be detected in worm extracts; sod-1 activity has been implicated in the increased life-span of dauer larvae where this enzyme demonstrates the highest activity compared to other life-stages as well as in the increased life span…
175936	WBGene00003162	F20H11.3	O02640	60	4.0097	20	9	0.358	9543	10.4789	AGAGSATLSMALAGAR	ALIAIITNPVNSTVPIASEVLKK	21	7	0.273	9547	10.9982	ALIAIITNPVNSTVPIASEVLKK	SQAFVSELKGHDASK	10.7386	WBGene00003162	mdh-2	F20H11.3	Concise description: mdh-2 encodes a homolog of malate dehydrogenase that is predicted to be mitochondrial. Provisional description: This gene encodes a protein predicted by Eisenberg and coworkers, with 52 percentage accuracy, to be mitochondrial. Detailed description: none available
178279	WBGene00004424	JC8.3	P61866	59	3.9991	22	10	0.545	9543	11.5268	VAKIDVVPSAASLIVKELKEPPRDR	VAKIDVVPSAASLIVK	19	10	0.594	9547	9.95077	VAKIDVVPSAASLIVKELKEPPRDR	VAKIDVVPSAASLIVK	10.7388	WBGene00004424	rpl-12	JC8.3a	Concise description: rpl-12 encodes a large ribosomal subunit L12 protein required in mass RNAi assays for embryonic viability, fertility, normally rapid growth, and general health; the rpl-12 transcription unit has a nonsense transcript that is up-regulated in vivo by smg[-] mutations, indicating that rpl-12 is a natural substrate for SMG-mediated nonsense suppresssion; several other natural mRN…
175901	WBGene00004482	C16A3.9	P51404	63	3.9521	17	8	0.305	9543	8.90705	MTAEEVQDQIVK	SRKDIDSKYR	17	8	0.305	9547	8.90332	MTAEEVQDQIVK	MTAEEVQDQIVK	8.90518	WBGene00004482	rps-13	C16A3.9	Concise description: rps-13 encodes a small ribosomal subunit S13 protein; by homology, RPS-13 is predicted to function in protein biosynthesis; in C. elegans, RPS-13 activity is required for embryonic and germline development. Provisional description: rps-13 encodes a small ribosomal subunit S13 protein; by homology, RPS-13 is predicted to function in protein biosynthesis; in C. elegans, RPS-13 …
178408	WBGene00004487	Y57G11C.16	O18240	68	3.9449	22	7	0.325	9543	11.5268	QKDIKDGKTGQLLSTAVDNKLREDLER	DIKDGKTGQLLSTAVDNKLREDLER	31	10	0.448	9547	16.2355	QKDIKDGKTGQLLSTAVDNKLREDLER	DIKDGKTGQLLSTAVDNKLREDLER	13.8811	WBGene00004487	rps-18	Y57G11C.16	Concise description: rps-18 encodes a small ribosomal subunit S18 protein. Provisional description: This gene encodes a protein predicted by Eisenberg and coworkers, with 52 percentage accuracy, to be mitochondrial. Proteins localized to a given organelle by experiments tend to share a characteristic phylogenetic distribution of their homologs, called a phylogenetic profile. For instance, mitocho…
175429	WBGene00021800	Y53G8AL.2	Y53G8AL.2	37	3.9301	5	2	0.072	9543	2.61972	GATGIKSETSKNVAFN	SSAVTSAENAHPEPR	5	2	0.072	9547	2.61862	GATGIKSETSKNVAFN	SSAVTSAENAHPEPR	2.61917	WBGene00021800	Y53G8AL.2	Y53G8AL.2	Concise description: none available Provisional description: none available Detailed description: none available
175027	WBGene00001884	ZK131.4	P62784	58	3.8614	17	7	0.282	9543	8.90705	KVLRDNIQGITKPAIR	RDNIQGITKPAIR	10	4	0.155	9547	5.23725	RDNIQGITKPAIR	KVLRDNIQGITKPAIR	7.07215	WBGene00001884	his-10	ZK131.4	Concise description: his-10 encodes an H4 histone. Provisional description: his-10 encodes an H4 histone. Detailed description: none available
179150	WBGene00020246	T05B11.3	P90961	40	3.8183	5	4	0.235	9543	2.61972	AQQEQLLSKKDEAEEKKKIELR	TLQLSHDENLKNEKSNQELFAK	6	4	0.199	9547	3.14235	AQQEQLLSKKDEAEEKKKIELR	EKTLQLSHDENLKNEK	2.88103	WBGene00020246	clic-1	T05B11.3	Concise description: none available Provisional description: none available Detailed description: none available
177366	WBGene00006780	B0350.2	G5ECZ1	46	3.7523	8	4	0.028	9543	4.19155	HVHDSEDGPVVEER	SLKMSEADGKHSEAVQR	9	4	0.028	9547	4.71352	HVHDSEDGPVVEER	SLKMSEADGKHSEAVQR	4.45254	WBGene00006780	unc-44	B0350.2a	Concise description: The unc-44 gene encodes an ankyrin-like protein required for proper sex myoblast and axonal guidance during development. Provisional description: Sex myoblasts, which migrate during larval hermaphrodite development, require a gonad-dependent repellent cue to properly reach their precise final positions: this repulsive signal requires the activity of unc-14, unc-33, unc-44, an…
24104384	WBGene00004432	E04A4.8	O44480	64	3.7313	23	8	0.256	9543	12.0507	PTKALGETLNEYVVVGR	ALGETLNEYVVVGR	19	7	0.294	9547	9.95077	PTKALGETLNEYVVVGR	PTKALGETLNEYVVVGRKIPTEKEPVTPI	11.0007	WBGene00004432	rpl-20	E04A4.8	Concise description: rpl-20 encodes a large ribosomal subunit L18a protein. Provisional description: rpl-20 encodes a large ribosomal subunit L18a protein. Detailed description: none available
172408	WBGene00019322	K02F2.2	P27604	68	3.6752	23	12	0.371	9543	12.0507	TLDEEVAYLHLAQLGVK	VAVVAGYGDVGKGSAASLK	23	10	0.359	9547	12.0457	TLDEEVAYLHLAQLGVK	GLSEETTTGVHNLAK	12.0482	WBGene00019322	ahcy-1	K02F2.2	Concise description: ahcy-1 encodes the C. elegans S-adenosylhomocysteine hydrolase (SAHH) ortholog; by homology, AHCY-1 is predicted to catalyze the hydrolysis of S-adenosyl-L-homocysteine to adenosine and L-homocysteine; loss of ahcy-1 activity via RNAi results in embryonic and larval lethality, abnormal body morphology, sick animals, and uncoordinated locomotion; Northern blot analyses indicat…
171767	WBGene00021350	Y37E3.8	Y37E3.8	62	3.6495	5	2	0.125	9543	2.61972	FSHEAEQKIKK	FSHEAEQKIK	5	3	0.25	9547	2.61862	FSHEAEQKIKK	FSHEAEQKIK	2.61917	WBGene00021350	Y37E3.8	Y37E3.8a	Concise description: none available Provisional description: none available Detailed description: none available
176097	WBGene00004449	ZK652.4	P34662	66	3.6182	22	7	0.35	9543	11.5268	KLDEQKTELATLR	LLTVINQTQKQELR	20	7	0.341	9547	10.4745	KLDEQKTELATLR	LLTVINQTQKQELR	11.0007	WBGene00004449	rpl-35	ZK652.4	Concise description: rpl-35 encodes a large ribosomal subunit L35 protein. Provisional description: rpl-35 encodes a large ribosomal subunit L35 protein. Detailed description: none available
173160	WBGene00001427	Y18D10A.19	Q9U2Q8	45	3.6065	8	2	0.157	9543	4.19155	GVDRQILVEGDNVTKPK	QILVEGDNVTKPK	8	2	0.157	9547	4.1898	GVDRQILVEGDNVTKPK	QILVEGDNVTKPK	4.19067	WBGene00001427	fkb-2	Y18D10A.19	Concise description: fkb-2 encodes a peptidylprolyl cis/trans isomerase homologous to the mammalian FK506 immunosuppressant-binding protein 1A (FKBP1A, OMIM:186945, mutations associated with myocardial noncompaction); by homology, FKB-2 could function in a number of processes including protein folding, signal transduction, and regulation of muscle contraction; however, the precise role of FKB-2 i…
172901	WBGene00004476	ZC434.2	Q23312	58	3.5939	19	10	0.32	9543	9.95494	VHLDKSHQTNVGHK	VHLDKSHQTNVGHKIGV	13	6	0.237	9547	6.80842	VHLDKSHQTNVGHK	VHLDKSHQTNVGHKIGV	8.38168	WBGene00004476	rps-7	ZC434.2	Concise description: rps-7 encodes a small ribosomal subunit S7 protein. Provisional description: rps-7 encodes a small ribosomal subunit S7 protein. Detailed description: none available
177365	WBGene00004494	K02B2.5	P52821	62	3.5931	16	9	0.368	9543	8.38311	CVVHHHGQVVYTR	AGLKELQAK	19	9	0.368	9547	9.95077	CVVHHHGQVVYTR	AGLKELQAK	9.16694	WBGene00004494	rps-25	K02B2.5	Concise description: rps-25 encodes a small ribosomal subunit S25 protein. Provisional description: rps-25 encodes a small ribosomal subunit S25 protein. Detailed description: none available
181124	WBGene00006764	ZK721.2	Q9GYF1	53	3.5697	9	5	0.256	9543	4.7155	QQLLKEQERQK	IVKKDVMEAIVNVK	5	3	0.087	9547	2.61862	QQLLKEQERQK	GKFVKPSLKK	3.66706	WBGene00006764	unc-27	ZK721.2	Concise description: unc-27 encodes a troponin I isoform; unc-27 is required for coordinated motility and normal muscle morphology; structural analyses indicate that unc-27 is required for proper sarcomeric organization; unc-27/troponin I interacts with the body wall and pharynx types of troponin C; expression studies show that unc-27 is expressed in body wall, vulval and anal muscles. Provisiona…
176718	WBGene00006728	ZK1010.1	P49632	72	3.5457	25	5	0.484	9543	13.0986	IQDKEGIPPDQQR	QLEDGRTLSDYNIQKESTLHLVLR	23	5	0.484	9547	12.0457	QLEDGRTLSDYNIQKESTLHLVLR	TITLEVEASDTIENVKAK	12.5722	WBGene00006728	ubq-2	ZK1010.1	Concise description: ubq-2 encodes a bifunctional protein that contains two domains; an N-terminal ubiquitin peptide, and a C-terminal large ribosomal subunit protein L40 peptide. Provisional description: ubq-2 encodes a bifunctional protein that contains two domains; an N-terminal ubiquitin peptide, and a C-terminal large ribosomal subunit protein L40 peptide. Detailed description: none available
175827	WBGene00017166	F01F1.12	G8JY45	61	3.5223	19	6	0.213	9543	9.95494	MATVGGAFKDSLTQAQKDELHQIALK	IVQDGKGILAADESTGTIGK	15	6	0.246	9547	7.85587	IVQDGKGILAADESTGTIGK	MATVGGAFKDSLTQAQKDELHQIALK	8.90541	WBGene00017166	aldo-2	F01F1.12a	Concise description: aldo-2 encodes a fructose-bisphosphate aldolase homologous to human ALDOB, which when mutated leads to fructosemia, hereditary fructose intolerance (OMIM:229600). Provisional description: aldo-2 encodes a fructose-bisphosphate aldolase homologous to human ALDOB, which when mutated leads to fructosemia, hereditary fructose intolerance (OMIM:229600). Detailed description: none …
172535	WBGene00009187	F27D4.1	F27D4.1	42	3.4305	5	2	0.087	9543	2.61972	VLVAQDEKLKNNLPER	VAEQVAKVNGVKR	5	2	0.087	9547	2.61862	VLVAQDEKLKNNLPER	VAEQVAKVNGVKR	2.61917	WBGene00009187	F27D4.1	F27D4.1	Concise description: The F27D4.1 gene encodes an ortholog of the human gene ELECTRON-TRANSFER-FLAVOPROTEIN, ALPHA POLYPEPTIDE (ETFA), which when mutated leads to glutaricaciduria type IIA (OMIM:231680). Provisional description: The F27D4.1 gene encodes an ortholog of the human gene ELECTRON-TRANSFER-FLAVOPROTEIN, ALPHA POLYPEPTIDE (ETFA), which when mutated leads to glutaricaciduria type IIA (OMI…
179627	WBGene00010790	K12G11.3	Q17334	33	3.4111	2	2	0.072	9543	1.04789	KPMEQAVEYVR	ALVFDTWNGPLEVR	2	2	0.092	9547	1.04745	GIVKVPLELVKLEDVPAVYQR	KPMEQAVEYVR	1.04767	WBGene00010790	sodh-1	K12G11.3	Concise description: none available Provisional description: none available Detailed description: none available
175413	WBGene00006725	H06I04.4	P37165	62	3.4079	13	5	0.221	9543	6.81128	CHDTLVVDTATAAATSGEKGGKKGKK	CHDTLVVDTATAAATSGEKGGK	14	4	0.221	9547	7.33215	CHDTLVVDTATAAATSGEKGGKKGKK	CHDTLVVDTATAAATSGEKGGKK	7.07172	WBGene00006725	ubl-1	H06I04.4a	Concise description: ubl-1 encodes a protein similar to Drosophila ubiquitin/ ribosomal protein S27a that affects body length, fertility, and larval viability. Provisional description: ubl-1 encodes a protein similar to Drosophila ubiquitin/ ribosomal protein S27a that affects body length, fertility, and larval viability. Detailed description: none available
176146	WBGene00004433	C14B9.7	P34334	65	3.4014	20	8	0.261	9543	10.4789	GAHTVTTQNNEPELLAPLRFEIVA	GAHTVTTQNNEPELLAPLRFE	16	7	0.236	9547	8.3796	GAHTVTTQNNEPELLAPLR	GAHTVTTQNNEPELLAPLRFEIVA	9.42925	WBGene00004433	rpl-21	C14B9.7	Concise description: rpl-21 encodes a large ribosomal subunit L21 protein; by homology, RPL-21 is predicted to function in protein biosynthesis; in C. elegans, RPL-21 activity is required for embryonic and germline development. Provisional description: rpl-21 encodes a large ribosomal subunit L21 protein; by homology, RPL-21 is predicted to function in protein biosynthesis; in C. elegans, RPL-21 …
180651	WBGene00015954	C18B2.3	C18B2.3	31	3.3949	2	2	0.131	9543	1.04789	SLAASALTTTPPFHSVGVQR	KELNLSSSLSR	2	2	0.131	9547	1.04745	SLAASALTTTPPFHSVGVQR	KELNLSSSLSR	1.04767	WBGene00015954	C18B2.3	C18B2.3	Concise description: none available Provisional description: none available Detailed description: none available
178538	WBGene00004496	F56E10.4	Q9TXP0	69	3.386	17	5	0.47	9543	8.90705	PLAVDLLHPEPQREIR	VQHPNSYFMDVK	19	5	0.47	9547	9.95077	PLAVDLLHPEPQREIR	AKLTEGCSFR	9.42891	WBGene00004496	rps-27	F56E10.4	Concise description: rps-27 encodes a small ribosomal subunit S27 protein. Provisional description: rps-27 encodes a small ribosomal subunit S27 protein. Detailed description: none available
179958	WBGene00008262	C53A5.1	O17694	50	3.3814	11	4	0.331	9543	5.76339	GAAVVVASPNAPIPATDLHPR	YNPLKKEGEVEVGH	7	4	0.331	9547	3.66607	GAAVVVASPNAPIPATDLHPR	YNPLKKEGEVEVGHY	4.71473	WBGene00008262	ril-1	C53A5.1	Concise description: none available Provisional description: none available Detailed description: none available
175879	WBGene00004472	C23G10.3	P48152	69	3.3776	24	9	0.417	9543	12.5747	NALPDHVQIVEPQEEVLPKEPHSQHKEEKKDVQVPAAQPVAPVQ	KDVQVPAAQPVAPVQ	16	4	0.279	9547	8.3796	NALPDHVQIVEPQEEVLPKEPHSQHKEEKKDVQVPAAQPVAPVQ	KDVQVPAAQPVAPVQ	10.4771	WBGene00004472	rps-3	C23G10.3	Concise description: rps-3 encodes a small ribosomal subunit S3 protein that contains a KH RNA-binding domain and by homology,is predicted to function in protein biosynthesis; in C. elegans, RPS-3 activity is required for embryonic and germline development, as well as the overall health of the animal. Provisional description: rps-3 encodes a small ribosomal subunit S3 protein that contains a KH R…
179154	WBGene00004499	C26F1.4	Q18231	51	3.3761	5	3	0.138	9543	2.61972	YVNVASGPGKKRGPNSNS	VNVASGPGKKRGPNSNS	4	3	0.138	9547	2.0949	YVNVASGPGKKRGPNSNS	VNVASGPGKKRGPNSNS	2.35731	WBGene00004499	rps-30	C26F1.4	Concise description: rps-30 encodes two proteins, a small ribosomal subunit S30 protein and ubiquitin, which is cleaved from the ribosomal protein posttranslationally; by homology, S30 is predicted to function in protein biosynthesis and ubiquitin in protein degradation; in C. elegans, loss of rps-30 function via RNA-mediated interference (RNAi) does not result in any obvious abnormalities. Provi…
180986	WBGene00018519	F46H5.3	F46H5.3	64	3.3572	17	9	0.248	9543	8.90705	LGLTEFEAVKQMYDGIAHLIALEK	GIHGEHSESEGGVYDISNK	17	10	0.27	9547	8.90332	GIHGEHSESEGGVYDISNK	GIHGEHSESEGGVYDISNKAR	8.90518	WBGene00018519	F46H5.3	F46H5.3a	Concise description: none available Provisional description: none available Detailed description: none available
178083	WBGene00004480	F40F11.1	Q20206	65	3.3345	16	5	0.361	9543	8.38311	MSEQTERAFLKQPTVNLNNKAR	YIREVGLGFKAPR	18	6	0.29	9547	9.42705	YIREVGLGFKAPR	MSEQTERAFLKQPTVNLNNKAR	8.90508	WBGene00004480	rps-11	F40F11.1	Concise description: rps-11 encodes a small ribosomal subunit S11 protein; by homology, RPS-11 is predicted to function in protein biosynthesis; in C. elegans, RPS-11 activity is required for embryonic and germline development, as well as the overall health of the animal; loss of rps-11 activity in adult animals extends lifespan. Provisional description: rps-11 encodes a small ribosomal subunit S…
172943	WBGene00004408	F25H2.10	Q93572	70	3.3293	20	8	0.311	9543	10.4789	LLPHIVENVGFVFTKEDLGEIR	LVELFEEYPKCLLVGVDNVGSK	20	8	0.311	9547	10.4745	LLPHIVENVGFVFTKEDLGEIR	LVELFEEYPKCLLVGVDNVGSK	10.4767	WBGene00004408	rla-0	F25H2.10	Concise description: rpa-0 encodes an acidic ribosomal subunit protein P0. Provisional description: rpa-0 encodes an acidic ribosomal subunit protein P0. Detailed description: none available
172818	WBGene00004426	C04F12.4	Q9XVE9	62	3.2552	15	8	0.481	9543	7.85916	VVFIASGKDQGKLAAIVNVIDGNRVQIDGPSSDVTR	AAFDAAKVTENFQK	15	7	0.474	9547	7.85587	VVFIASGKDQGKLAAIVNVIDGNRVQIDGPSSDVTR	AAFDAAKVTENFQK	7.85752	WBGene00004426	rpl-14	C04F12.4	Concise description: rpl-14 encodes a large ribosomal subunit L14 protein. Provisional description: rpl-14 encodes a large ribosomal subunit L14 protein. Detailed description: none available
174128	WBGene00016630	C44B7.10	Q18599	70	3.2248	20	9	0.221	9543	10.4789	RTAGIFRDEREVAFPIAGKSPK	ESLDKAAFDRLK	17	6	0.149	9547	8.90332	RTAGIFRDEREVAFPIAGKSPK	ESLDKAAFDRLK	9.69111	WBGene00016630	C44B7.10	C44B7.10	Concise description: none available Provisional description: none available Detailed description: none available
172471	WBGene00002348	R06C7.10	P02567	55	3.2131	12	5	0.03	9543	6.28733	IQEKEEEFENTR	IQEKEEEFENTRK	11	7	0.038	9547	5.76097	MSLEHEKDPGWQYLKR	IQEKEEEFENTRK	6.02415	WBGene00002348	myo-1	R06C7.10	Concise description: none available Provisional description: none available Detailed description: none available
174423	WBGene00011884	T21B10.2	Q27527	67	3.2069	21	7	0.217	9543	11.0028	GNPTVEVDLFTEKGVFR	QIYDSRGNPTVEVDLFTEKGVFR	13	4	0.118	9547	6.80842	GNPTVEVDLFTEKGVFR	AAVPSGASTGVHEALELRDGDKAVHLGKGVLK	8.90561	WBGene00011884	enol-1	T21B10.2a	Concise description: enol-1 is orthologous to human ENOLASE 1 (also CRYSTALLIN, TAU; ENO1; OMIM:172430), which when mutated leads to spherocytic red cell enolase deficiency. Provisional description: enol-1 is orthologous to human ENOLASE 1 (also CRYSTALLIN, TAU; ENO1; OMIM:172430), which when mutated leads to spherocytic red cell enolase deficiency. Detailed description: none available
174695	WBGene00004454	C09H10.2	P48166	49	3.2056	4	2	0.105	9543	2.09578	CKHFELGGQKK	CKHFELGGQK	9	5	0.276	9547	4.71352	CKHFELGGQKK	SGFGGQTKPIFR	3.40465	WBGene00004454	rpl-41	C09H10.2	Concise description: rpl-41 encodes a large ribosomal subunit L41 protein; by homology, RPL-41 is predicted to function in protein biosynthesis. Provisional description: rpl-41 encodes a large ribosomal subunit L41 protein; by homology, RPL-41 is predicted to function in protein biosynthesis. Detailed description: none available
180950	WBGene00000991	M03A8.1	Q21481	36	3.1994	3	2	0.083	9543	1.57183	SALIGLSNSLAQEGAK	SSALFQEMADGVKADPTAVK	3	2	0.083	9547	1.57117	SSALFQEMADGVKADPTAVK	SALIGLSNSLAQEGAK	1.5715	WBGene00000991	dhs-28	M03A8.1	Concise description: dhs-28 encodes an ortholog of human 17-BETA-HYDROXYSTEROID DEHYDROGENASE 4 (HSD17B4; OMIM:601860, mutated in D-bifunctional protein deficiency), which contains a C-terminal SCP-2 sterol transfer domain; the deletion allele dhs-28(ok450) is superficially wild-type. Provisional description: dhs-28 encodes an ortholog of human 17-BETA-HYDROXYSTEROID DEHYDROGENASE 4 (HSD17B4; OMI…
178012	WBGene00004474	T05E11.1	P49041	61	3.1964	14	6	0.3	9543	7.33522	GSSNSYAIKKKDELER	SVNVSDISLVDYIPVKEK	14	7	0.329	9547	7.33215	SVNVSDISLVDYIPVKEK	TIAECLADELINAAK	7.33369	WBGene00004474	rps-5	T05E11.1	Concise description: rps-5 encodes a small ribosomal subunit S5 protein. Provisional description: rps-5 encodes a small ribosomal subunit S5 protein. Detailed description: none available
174059	WBGene00019061	F58F12.1	F58F12.1	57	3.1855	9	4	0.258	9543	4.7155	ASGEGSEVARAEAQIRAEVAEALIK	AAAAPAANANPEELRLT	13	6	0.509	9547	6.80842	ANHVPTIGVLKPGVVSVTTNEGTVQR	AAAAPAANANPEELRLTFASPDTAVFSNAVVK	5.76196	WBGene00019061	F58F12.1	F58F12.1	Concise description: F58F12.1 encodes the delta subunit of the soluble, catalytic F1 portion of ATP synthase (mitochondrial respiratory chain [MRC] complex V); RNAi experiments indicate that F58F12.1 activity is essential for embryonic and larval development, as well as for reproduction and normal rates of growth and development. Provisional description: F58F12.1 encodes the delta subunit of the …
175691	WBGene00000107	F54D8.3	Q8IG19	41	3.183	3	2	0.069	9543	1.57183	YIAAGKKDGAQLVTGGAK	TVTIKVPQKNS	6	3	0.097	9547	3.14235	YIAAGKKDGAQLVTGGAK	IDKALHIANATR	2.35709	WBGene00000107	alh-1	F54D8.3a	Concise description: alh-1 is orthologous to the human gene ALDEHYDE DEHYDROGENASE 2, MITOCHONDRIAL (ALDH2; OMIM:100650), in which a polymorphism can lead to acute ethanol intolerance. Provisional description: alh-1 is orthologous to the human gene ALDEHYDE DEHYDROGENASE 2, MITOCHONDRIAL (ALDH2; OMIM:100650), in which a polymorphism can lead to acute ethanol intolerance. Detailed description: non…
178873	WBGene00002010	C37H5.8	P11141	65	3.1563	14	4	0.102	9543	7.33522	AKFEQIVGDLIKR	NSGGDAQEAKTAEEPKKEQN	17	6	0.126	9547	8.90332	AKFEQIVGDLIKR	RYEDPEVQKDLK	8.11927	WBGene00002010	hsp-6	C37H5.8	Concise description: hsp-6 encodes a nuclear-encoded mitochondrion-specific chaperone that is a member of the DnaK/Hsp70 superfamily of molecular chaperones; hsp-6 is involved in the mitochondrial unfolded protein response, as hsp-6 expression, normally broadly detected from the L1 larval through adult stages of development, is greatly increased in response to treatments that disrupt mitochondria…
174699	WBGene00004478	F40F8.10	Q20228	60	3.1346	8	3	0.259	9543	4.19155	LDSQKHIDFSLQSPYGGGRPGR	TLRKGDGAGGDDEE	10	3	0.259	9547	5.23725	LDSQKHIDFSLQSPYGGGRPGR	TLRKGDGAGGDDEE	4.7144	WBGene00004478	rps-9	F40F8.10	Concise description: rps-9 encodes a small ribosomal subunit S9 protein. Provisional description: rps-9 encodes a small ribosomal subunit S9 protein. Detailed description: none available
175628	WBGene00004469	B0393.1	P46769	68	3.1129	16	6	0.232	9543	8.38311	MSGGAAHSALTEEDVMK	AIAAVENPADVVVVSARPYAQR	17	6	0.279	9547	8.90332	MSGGAAHSALTEEDVMK	SPGCLTNQIQK	8.64321	WBGene00004469	rps-0	B0393.1	Concise description: rps-0 encodes a small ribosomal subunit SA protein that appears to function as both a ribosomal component and a laminin receptor; by homology, RPS-0 is predicted to play roles in protein biosynthesis and cell adhesion; in C. elegans, RPS-0 activity is required for embryonic and germline development, vulval morphogenesis, and the overall health of the animal. Provisional descr…
171901	WBGene00020915	W01B11.3	O45012	50	3.1014	6	3	0.068	9543	3.14367	TTAGAVEATSEITEGKLSK	RFDDNEESTNAIKK	8	4	0.072	9547	4.1898	TTAGAVEATSEITEGKLSK	RFDDNEESTNAIKK	3.66674	WBGene00020915	nol-5	W01B11.3	Concise description: none available Provisional description: none available Detailed description: none available
172920	WBGene00003902	Y106G6H.2	Q7K797	60	3.0846	4	3	0.07	9543	2.09578	SKVDEAASVLVSAQKQ	NLDETVDDDGLKKQFESYGNITSAK	3	1	0.043	9547	1.57117	NLDETVDDDGLKKQFESYGNITSAK	NA	1.83347	WBGene00003902	pab-1	Y106G6H.2a	Concise description: pab-1 encodes a polyadenylate-binding protein (i.e., poly(A)-binding protein, or PAB); pab-1 is essential for germline proliferation, regulation of adult lifespan, and normal body size; PAB-1 forms a complex with ATX-2, the C. elegans ataxin 2 ortholog, which is also required for germline development; PAB-1 has been successfully used as an epitope-tagged transgenic reagent fo…
171853	WBGene00004412	Y71F9AL.13	Q95Y46	62	3.0304	12	4	0.218	9543	6.28733	ESLNEAIAEVLKGSSEKPR	ESLNEAIAEVLKGSSEKPRK	14	6	0.264	9547	7.33215	ESLNEAIAEVLKGSSEKPR	SYDAFIASESLIKQIPR	6.80974	WBGene00004412	rpl-1	Y71F9AL.13a	Concise description: rpl-1 encodes a large ribosomal subunit L10a protein; by homology, RPL-1 is predicted to function in protein biosynthesis; in C. elegans, RPL-1 activity is essential for embryonic development. Provisional description: rpl-1 encodes a large ribosomal subunit L10a protein; by homology, RPL-1 is predicted to function in protein biosynthesis; in C. elegans, RPL-1 activity is esse…
180692	WBGene00006921	F20B6.2	Q19626	68	3.0171	15	5	0.128	9543	7.85916	GQKIPIFSASGLPHNEIAAQIVR	MAAVDVNQPITGHK	16	5	0.128	9547	8.3796	GQKIPIFSASGLPHNEIAAQIVR	MAAVDVNQPITGHK	8.11938	WBGene00006921	vha-12	F20B6.2	Concise description: vha-12 encodes an ortholog of subunit B of the cytoplasmic (V1) domain of vacuolar proton-translocating ATPase (V-ATPase); VHA-12 is orthologous to human ATP6V1B1 (OMIM:192132, mutated in distal renal tubular acidosis with progressive sensorineural deafness) and ATP6V1B2 (OMIM:606939); VHA-12 and TAG-300/Y110A7A.12 are co-orthologs; VHA-17, like VHA-1 and VHA-12, antagonizes …
174645	WBGene00010896	M28.5	M28.5	44	2.9868	6	4	0.398	9543	3.14367	ACGVTRPVIAASITQNEGSQLKSQIQK	KGANEATKTLNR	6	3	0.305	9547	3.14235	ACGVTRPVIAASITQNEGSQLKSQIQK	KGANEATKTLNR	3.14301	WBGene00010896	M28.5	M28.5	Concise description: none available Provisional description: none available Detailed description: none available
3565504	WBGene00001684	K10B3.8	P17329	56	2.9427	11	6	0.144	9543	5.76339	FKGTVAHEGDYLLVAKEGK	DGRGAGQNIIPASTGAAK	9	8	0.258	9547	4.71352	FKGTVAHEGDYLLVAKEGK	VINDNFGIIEGLMTTVHAVTATQK	5.23846	WBGene00001684	gpd-2	K10B3.8	Concise description: gpd-2 encodes one of four C. elegans glyceraldehyde-3-phosphate dehydrogenases (GAPDHs); by homology, GPD-2 is predicted to reversibly catalyze the oxidation and phosphorylation of glyceraldehyde-3-phosphate to 1,3-diphosphoglycerate during glycolysis; in C. elegans, GPD-2 and GPD-3 constitute the major GAPDH isoenzymes and are expressed at highest levels during postembryonic…
177442	WBGene00006917	C17H12.14	Q95X44	63	2.9245	14	6	0.385	9543	7.33522	AREDHIGAVLDEAR	MGISDNDVQKQLR	11	5	0.332	9547	5.76097	AREDHIGAVLDEAR	MGISDNDVQKQLR	6.54809	WBGene00006917	vha-8	C17H12.14	Concise description: vha-8 encodes an ortholog of subunit E of the cytoplasmic (V1) domain of vacuolar proton-translocating ATPase (V-ATPase); VHA-8 is a predicted cytosolic stator (stalk) component; VHA-8 is required for embryonic and larval viability, for ovulation, and for receptor-mediated endocytosis of yolk protein; VHA-8 is highly expressed in the cytoplasm of excretory canals throughout d…
177038	WBGene00022089	Y69A2AR.18	Y69A2AR.18	62	2.9117	15	9	0.284	9543	7.85916	TVVSYETSKLQILPLEAIK	ILNNAGDKEIR	9	6	0.195	9547	4.71352	TVVSYETSKLQILPLEAIK	ILNNAGDKEIR	6.28634	WBGene00022089	Y69A2AR.18	Y69A2AR.18a	Concise description: none available Provisional description: none available Detailed description: none available
174371	WBGene00004416	F54C9.5	P49405	65	2.8906	13	7	0.283	9543	6.81128	GVADGGINVPHSESR	VHSAIRADASPAAK	13	8	0.3	9547	6.80842	GVADGGINVPHSESR	FLAAGLNADNLVATYQK	6.80985	WBGene00004416	rpl-5	F54C9.5	Concise description: rpl-5 encodes a large ribosomal subunit L5 protein; by homology, RPL-5 is predicted to function in protein biosynthesis; in C. elegans RPL-5 activity is broadly required for embryonic, larval, germline, and vulval development, as well as normal body coloration, morphology, and postembryonic growth rates. Provisional description: rpl-5 encodes a large ribosomal subunit L5 prot…
171949	WBGene00004425	C32E8.2	P91128	68	2.8674	13	8	0.319	9543	6.81128	TNKTAEGLKANADRLKEYK	AVEIAPRPVAGLLR	15	7	0.266	9547	7.85587	TNKTAEGLKANADRLKEYK	TAEGLKANADRLKEYK	7.33357	WBGene00004425	rpl-13	C32E8.2a	Concise description: rpl-13 encodes a large ribosomal subunit L13 protein. Provisional description: rpl-13 encodes a large ribosomal subunit L13 protein. Detailed description: none available
181404	WBGene00003514	T18D3.4	P12845	54	2.8357	9	5	0.043	9543	4.7155	VKDLHDQLADEKDAR	QLEEAEEQANSHLSK	8	5	0.044	9547	4.1898	VKDLHDQLADEKDAR	SREEMLQDQSR	4.45265	WBGene00003514	myo-2	T18D3.4	Concise description: myo-2 encodes a muscle-type specific myosin heavy chain isoform; myo-2 is expressed in pharyngeal muscle. Provisional description: myo-2 encodes a muscle-type specific myosin heavy chain isoform; myo-2 is expressed in pharyngeal muscle. Detailed description: none available
177906	WBGene00008506	F01G10.1	O17759	58	2.7693	10	6	0.147	9543	5.23944	KIDSDIEGHPTPR	TVSEQLRNDLEDAANR	9	5	0.118	9547	4.71352	KIDSDIEGHPTPR	TVSEQLRNDLEDAANR	4.97648	WBGene00008506	tkt-1	F01G10.1	Concise description: tkt-1 encodes an ortholog of the human gene TRANSKETOLASE (TKT; OMIM:606781), which when mutated leads to Wernicke-Korsakoff syndrome (OMIM:277730). Provisional description: tkt-1 encodes an ortholog of the human gene TRANSKETOLASE (TKT; OMIM:606781), which when mutated leads to Wernicke-Korsakoff syndrome (OMIM:277730). Detailed description: none available
172693	WBGene00004484	F36A2.6	Q9XVP0	67	2.7498	11	4	0.192	9543	5.76339	MATQDDAHLAELKKKR	MATQDDAHLAELKKK	14	4	0.192	9547	7.33215	MATQDDAHLAELKKKR	MATQDDAHLAELKKK	6.54777	WBGene00004484	rps-15	F36A2.6	Concise description: rps-15 encodes a small ribosomal subunit S15 protein. Provisional description: rps-15 encodes a small ribosomal subunit S15 protein. Detailed description: none available
177583	WBGene00004471	C49H3.11	P51403	63	2.7404	11	6	0.228	9543	5.76339	VAIGDHAGHVGLGVK	ISPVQKQTTAGQR	10	6	0.202	9547	5.23725	VAIGDHAGHVGLGVK	ISPVQKQTTAGQR	5.50032	WBGene00004471	rps-2	C49H3.11	Concise description: rps-2 encodes a small ribosomal subunit S2 protein. Provisional description: rps-2 encodes a small ribosomal subunit S2 protein. Detailed description: none available
176120	WBGene00018846	F54H12.6	P34460	49	2.6705	5	3	0.183	9543	2.61972	AALGSAPNASTYPNVAR	IPIGYGIKK	5	3	0.127	9547	2.61862	AALGSAPNASTYPNVAR	IPIGYGIKK	2.61917	WBGene00018846	eef-1B.1	F54H12.6	Concise description: none available Provisional description: none available Detailed description: none available
178188	WBGene00004492	F28D1.7	Q19877	65	2.6589	9	3	0.147	9543	4.7155	SGHAVGDIPGVR	SGHAVGDIPGVR	13	4	0.245	9547	6.80842	SGHAVGDIPGVR	SGHAVGDIPGVR	5.76196	WBGene00004492	rps-23	F28D1.7	Concise description: rps-23 encodes a small ribosomal subunit S23 protein; by homology, RPS-23 is predicted to function in protein biosynthesis; in C. elegans, RPS-23 activity is required for germline development, vulval morphogenesis, and the overall health of the animal. Provisional description: rps-23 encodes a small ribosomal subunit S23 protein; by homology, RPS-23 is predicted to function i…
175501	WBGene00004414	F13B10.2	G5ECE5	64	2.6384	9	6	0.153	9543	4.7155	HGHMGFTPK	LKRDFLAEAEAKA	12	7	0.176	9547	6.2847	SALTEEGKNNGSTEFDLTQK	LKRDFLAEAEAKA	5.5001	WBGene00004414	rpl-3	F13B10.2a	Concise description: rpl-3 encodes a large ribosomal subunit L3 protein required in mass RNAi assays for embryonic and larval viability, fertility, and general health; the rpl-3 transcription unit has a nonsense transcript that is up-regulated in vivo by smg[-] mutations, indicating that rpl-3 is a natural substrate for SMG-mediated nonsense suppresssion; several other natural mRNA substrates of …
181062	WBGene00001000	C18A11.7	Q18066	69	2.6162	12	5	0.142	9543	6.28733	LVGGGAEEIIANSDRIK	PDGKAPHFPQQPVAR	12	7	0.142	9547	6.2847	LVGGGAEEIIANSDRIK	TIKELADADAGAYR	6.28601	WBGene00001000	dim-1	C18A11.7a	Concise description: dim-1 encodes novel proteins containing three immunoglobulin-like repeats in the carboxy terminus; dim-1 was originally identified in screens for mutations that suppress locomotion defects caused by aberrant muscle assembly in animals carrying a missense mutation in unc-112, which encodes a pleckstrin homology domain-containing protein required for the early stages of muscle …
182726	WBGene00007646	C17E4.9	Q93235	35	2.5775	3	3	0.078	9543	1.57183	VEDKPVEEKKEL	ALNIEHDISSR	1	1	0.034	9547	0.523725	ALNIEHDISSR	NA	1.04778	WBGene00007646	nkb-1	C17E4.9	Concise description: none available Provisional description: none available Detailed description: none available
179209	WBGene00000219	F21F8.7	O01530	52	2.555	8	6	0.203	9543	4.19155	FGAKGDSQLSVPTTTFGIASK	SKFDSTASSTFVK	5	4	0.095	9547	2.61862	SKFDSTASSTFVK	SKFDSTASSTFVKNGK	3.40509	WBGene00000219	asp-6	F21F8.7	Concise description: aspartic protease. Provisional description: aspartic protease. Detailed description: none available
173873	WBGene00004434	C27A2.2	P52819	63	2.5495	9	3	0.315	9543	4.7155	TGHLAANNVKVEVAK	SKVSVVSEVPFSKR	10	3	0.315	9547	5.23725	TGHLAANNVKVEVAK	SKVSVVSEVPFSKR	4.97637	WBGene00004434	rpl-22	C27A2.2a	Concise description: rpl-22 encodes a large ribosomal subunit L22 protein; by homology, RPL-22 is predicted to function in protein biosynthesis; in C. elegans, RPL-22 activity is broadly required for embryonic and germline development, as well as normal body coloration, morphology, and postembryonic growth rates. Provisional description: rpl-22 encodes a large ribosomal subunit L22 protein; by ho…
177895	WBGene00010556	K04D7.1	Q21215	61	2.5061	6	4	0.163	9543	3.14367	DKTILVWDVDSVAPVDEGPIGRPVR	FSPSNRDPVIVSAGWDK	7	4	0.163	9547	3.66607	DKTILVWDVDSVAPVDEGPIGRPVR	NDKTTVLSSSRDK	3.40487	WBGene00010556	rack-1	K04D7.1	Concise description: rack-1 encodes a seven-WD repeat-containing protein that is the C. elegans ortholog of vertebrate Receptor for Activated C Kinase (Rack1); rack-1 is required cell autonomously for VD/DD motor axon pathfinding; rack-1 is also required for gonadal distal tip cell migration and for normal brood sizes; genetic analyses indicate that rack-1 functions in the same pathway with ced-1…
178997	WBGene00000802	Y38A10A.5	P27798	48	2.4393	3	2	0.073	9543	1.57183	AAKFDKDFSNKGK	EVYFKEEFNDASWEKR	5	3	0.114	9547	2.61862	AAKFDKDFSNKGK	HKDDFGAFKLSAGK	2.09523	WBGene00000802	crt-1	Y38A10A.5	Concise description: crt-1 encodes an ortholog of calreticulin (a calcium-binding molecular chaperone of the endoplasmic reticulum); crt-1 is dispensable for viability, but required for normal sperm development, male mating efficiency, some forms of necrotic cell death, and hermaphrodite fertility at high temperatures (which may reflect a stress response); crt-1 expression is induced by stress; C…
171646	WBGene00022042	Y65B4BR.5	V6CKR1	66	2.4335	8	2	0.086	9543	4.19155	VAEAAGLGDHIDKQAK	RVAEAAGLGDHIDKQAK	11	4	0.157	9547	5.76097	VAEAAGLGDHIDKQAK	RVAEAAGLGDHIDKQAK	4.97626	WBGene00022042	icd-2	Y65B4BR.5a	Concise description: none available Provisional description: none available Detailed description: none available
176501	WBGene00006536	K01G5.7	O17921	61	2.4163	8	3	0.069	9543	4.19155	AVLVDLEPGTMDSVR	AVLVDLEPGTMDSVR	8	3	0.076	9547	4.1898	AVLVDLEPGTMDSVR	AVLVDLEPGTMDSVR	4.19067	WBGene00006536	tbb-1	K01G5.7	Concise description: This gene encodes a homolog of mammalian beta-tubulin (TUBB) that is expressed at high levels in the germline; TBB-1 is redundant for embryonic viability, due to its paralog TBB-2. Provisional description: This gene encodes a homolog of mammalian beta-tubulin (TUBB) that is expressed at high levels in the germline; TBB-1 is redundant for embryonic viability, due to its paralo…
177701	WBGene00001132	T11B7.4	G5EEF6	20	2.4125	3	3	0.015	9543	1.57183	IKKIEK	IKKLEK								0.785915	WBGene00001132	alp-1	T11B7.4a	Concise description: alp-1 encodes the C. elegans ortholog of the ALP (alpha-actininassociated LIM protein)-Enigma family of proteins that are found at sites of actin filament anchorage, such as the muscle Z disk; in C. elegans, alp-1 is required for maintenance of actin filament organization and for stabilizing muscle contraction; ALP-1 co-localizes with alpha-actinin at body wall muscle dense b…
179998	WBGene00004485	T01C3.6	Q22054	63	2.4115	8	3	0.285	9543	4.19155	IKLQEPLLLVGKER	NIFAAYDKSLLVADPR	9	3	0.285	9547	4.71352	IKLQEPLLLVGKER	NIFAAYDKSLLVADPR	4.45254	WBGene00004485	rps-16	T01C3.6	Concise description: rps-16 encodes a small ribosomal subunit S16 protein. Provisional description: rps-16 encodes a small ribosomal subunit S16 protein. Detailed description: none available
173161	WBGene00003989	Y18D10A.20	Q9XW16	58	2.2906	6	3	0.341	9543	3.14367	VALFNDVTQVPAKGADIEGVHYVVPR	TEESLIFGKKENTGFFAVK	7	3	0.341	9547	3.66607	TEESLIFGKKENTGFFAVK	VALFNDVTQVPAKGADIEGVHYVVPR	3.40487	WBGene00003989	pfn-1	Y18D10A.20	Concise description: none available Provisional description: none available Detailed description: none available
178020	WBGene00008505	F01G4.6	F01G4.6	63	2.2652	6	3	0.096	9543	3.14367	IQVNPEKYTGIATGFR	IQVNPEKYTGIATGFRTTIAEEGAR	9	4	0.119	9547	4.71352	IQVNPEKYTGIATGFR	IQTSPGAPPTLR	3.9286	WBGene00008505	F01G4.6	F01G4.6a	Concise description: none available Provisional description: none available Detailed description: none available
176373	WBGene00002064	T05G5.10	G1K0V9	56	2.2233								14	3	0.261	9547	7.33215	KLEDICPSTHNMDVPVVK	KLEDICPSTHNMDVPVVK	3.66608	WBGene00002064	iff-1	T05G5.10a	Concise description: iff-1 encodes an eIF-5A homolog that affects fertility and is required for germ cell proliferation and for some P granule components to localize properly; expression is germline specific and mRNA is expressed in the distal region of gonads where germ cells actively proliferate. Provisional description: iff-1 encodes an eIF-5A homolog that affects fertility and is required for…
172679	WBGene00003925	C36B1.4	Q95005	39	2.1794	3	2	0.099	9543	1.57183	GKDCIVIGVEKK	VAAEAEEAASKKK	1	1	0.036	9547	0.523725	KVNDELQQR	NA	1.04778	WBGene00003925	pas-4	C36B1.4	Concise description: pas-4 encodes a proteasome alpha-type seven subunit of the core 20S proteasome subcomplex; loss of pas-4 activity via RNAi results in a wide variety of defects including embryonic and larval lethality, sterility, abnormal locomotion, slow growth, and abnormal transgene expression and subcellular localization; loss of pas-4 activity also results in activation of SKN-1, a trans…
179077	WBGene00006803	K11C4.3	G5EG85	31	2.1645								5	3	0.02	9547	2.61862	LQSDIDKFADTIR	VREHEAKLDEAGDLQR	1.30931	WBGene00006803	unc-70	K11C4.3a	Concise description: unc-70 encodes two isoforms of a beta-spectrin ortholog required for normal body curvature and shape, normal movement, and correct localization of the alpha-spectrin SPC-1; the predominant UNC-70 isoform is expressed in all embryonic cells except the intestine, at the plasma membrane at sites of intercellular contact; UNC-70 becomes largely restricted to muscles and neurons f…
177243	WBGene00017121	E04A4.7	P19974	51	2.1286	4	3	0.315	9543	2.09578	TSGTVSGFDYSAANKNK	TGPTLHGVIGR	2	2	0.252	9547	1.04745	ADERADLIKYIEVESAK	TGPTLHGVIGR	1.57161	WBGene00017121	cyc-2.1	E04A4.7	Concise description: cyc-2.1 encodes, along with cyc-2.2, one of two C. elegans cytochrome c proteins; the product of cyc-2.1 is predicted to function in the electron transport chain by transferring electrons from respiratory chain Complex III to Complex IV; large-scale RNAi screens indicate the cyc-2.1 activity is required for embryonic and larval development as well as for normal brood sizes an…
172921	WBGene00004444	Y106G6H.3	I2HAJ2	60	2.1039	14	5	0.252	9543	7.33522	TGVHHYNGNNIELGTACGR	TGVHHYNGNNIELGTACGR								3.66761	WBGene00004444	rpl-30	Y106G6H.3a	Concise description: rpl-30 encodes a large ribosomal subunit L30 protein; by homology, RPL-30 is predicted to function in protein biosynthesis; in C. elegans, loss of rpl-30 function via RNA-mediated interference (RNAi) does not result in any obvious abnormalities. Provisional description: rpl-30 encodes a large ribosomal subunit L30 protein; by homology, RPL-30 is predicted to function in prote…
172390	WBGene00002258	W02D3.5	O01812	51	2.0328	3	2	0.096	9543	1.57183	IKDSDKESIITR	KIKDSDKESIITR	3	2	0.089	9547	1.57117	IKDSDKESIITR	IKDSDKESIITR	1.5715	WBGene00002258	lbp-6	W02D3.5	Concise description: none available Provisional description: none available Detailed description: none available
177636	WBGene00017075	D2096.8	Q19007	48	1.9826	3	3	0.161	9543	1.57183	AVGDTIEWEDGKNVTKK	TIQIESDFYKR	3	2	0.089	9547	1.57117	TIQIESDFYKR	AVGDTIEWEDGKNVTKK	1.5715	WBGene00017075	nap-1	D2096.8	Concise description: D2096.8 encodes a protein related in sequence to the conserved NAP (Nucleosome Assembly Protein) family of proteins involved in chromatin remodeling; loss of D2096.8 activity in wild-type and various mutant backgrounds suggests that, in C. elegans, the product of D2096.8 is required for proper transcriptional regulation that affects a number of biological processes including …
175966	WBGene00002083	F57B9.6	P27639	62	1.9712	6	2	0.075	9543	3.14367	KGVAINFVTENDAR	GIYGFGFEKPSAIQKR	5	2	0.075	9547	2.61862	KGVAINFVTENDAR	GIYGFGFEKPSAIQKR	2.88115	WBGene00002083	inf-1	F57B9.6a	Concise description: inf-1 encodes a protein with high similarity to eukaryotic initiation factor 4A. Provisional description: inf-1 encodes a protein with high similarity to eukaryotic initiation factor 4A. Detailed description: none available
177455	WBGene00004458	T22D1.9	Q9GZH5	52	1.9671	2	1	0.015	9543	1.04789	VGQAVDVVAQAGKPK	NA	3	3	0.032	9547	1.57117	VGQAVDVVAQAGKPK	VGQAVDVVAQAGKPK	1.30953	WBGene00004458	rpn-1	T22D1.9	Concise description: rpn-1 encodes a non-ATPase subunit of the 26S proteasome's 19S regulatory particle (RP) base subcomplex; rpn-1 activity is essential for embryonic, larval, and germline development; by homology, RPN-1 is predicted to function in unfolding and recognition of protein substrates and/or recycling of ubiquitin moieties during protein degradation. Provisional description: rpn-1 enc…
178387	WBGene00010794	LLC1.3	O17953	50	1.9069	4	3	0.095	9543	2.09578	KNDGSVETINAR	AKTNNDQEGFVK	2	1	0.024	9547	1.04745	KNDGSVETINAR	NA	1.57161	WBGene00010794	dld-1	LLC1.3a	Concise description: LLC1.3 is orthologous to the human gene DIHYDROLIPOAMIDE DEHYDROGENASE (DLD; OMIM:246900), which when mutated leads to dihydrolipoamide dehydrogenase deficiency. Provisional description: LLC1.3 is orthologous to the human gene DIHYDROLIPOAMIDE DEHYDROGENASE (DLD; OMIM:246900), which when mutated leads to dihydrolipoamide dehydrogenase deficiency. Detailed description: none av…
179063	WBGene00020950	W02F12.5	O45148	52	1.8749	4	2	0.076	9543	2.09578	LQPGAGGGSSSAPAKEEPK	GVDPSHAITGARDEVR	3	2	0.076	9547	1.57117	LQPGAGGGSSSAPAKEEPK	GVDPSHAITGARDEVR	1.83347	WBGene00020950	dlst-1	W02F12.5	Concise description: none available Provisional description: none available Detailed description: none available
175338	WBGene00004491	F53A3.3	A8WIR1	47	1.8212	3	2	0.146	9543	1.57183	VRMNVLADALNAINNAEKR	ADALNAINNAEKR	1	1	0.1	9547	0.523725	ADALNAINNAEKR	NA	1.04778	WBGene00004491	rps-22	F53A3.3a	Concise description: rps-22 encodes a small ribosomal subunit S15a protein. Provisional description: rps-22 encodes a small ribosomal subunit S15a protein. Detailed description: none available
180251	WBGene00000214	Y39B6A.20	G5EEI4	55	1.7726	4	3	0.04	9543	2.09578	QKFDTTKSTTFVKETR	STTFVKETR	3	2	0.04	9547	1.57117	QKFDTTKSTTFVKETR	TFVKETR	1.83347	WBGene00000214	asp-1	Y39B6A.20	Concise description: asp-1 encodes a homolog of cathepsin D aspartic protease; it is transcribed exclusively in intestinal cells of the late embryo and early larvae and is not observed in older larvae or adults; ASP-1 is dispensable for neuronal degeneration. Provisional description: asp-1 encodes a homolog of cathepsin D aspartic protease; it is transcribed exclusively in intestinal cells of the…
171750	WBGene00004441	C53H9.1	P91914	58	1.7362	4	2	0.191	9543	2.09578	KAVVVKQQDEGVSDR	SKFEERYKTGK	3	2	0.25	9547	1.57117	KAVVVKQQDEGVSDR	KAVVVKQQDEGVSDRTYPHAIIAGIDRYPLKVTK	1.83347	WBGene00004441	rpl-27	C53H9.1	Concise description: rpl-27 encodes a large ribosomal subunit L27 protein. Provisional description: rpl-27 encodes a large ribosomal subunit L27 protein. Detailed description: none available
177775	WBGene00010317	F59B8.2	H9G2T3	57	1.7103	3	2	0.064	9543	1.57183	NILGGTVFREPIIVK	TVEAEAAHGTVTR	4	2	0.064	9547	2.0949	NILGGTVFREPIIVK	TVEAEAAHGTVTR	1.83336	WBGene00010317	idh-1	F59B8.2a	Concise description: idh-1 encodes a predicted cytosolic isocitrate dehydrogenase; by homology, IDH-1 is predicted to catalyze the formation of alpha-ketoglutarate from isocitrate. Provisional description: idh-1 encodes a predicted cytosolic isocitrate dehydrogenase; by homology, IDH-1 is predicted to catalyze the formation of alpha-ketoglutarate from isocitrate. Detailed description: none availa…
172201	WBGene00004431	C09D4.5	O02639	65	1.7007	5	4	0.187	9543	2.61972	KISQSEKVIAGK	RLVNDGLIIRKPV	4	3	0.212	9547	2.0949	KISQSEKVIAGK	RLVNDGLIIRKPV	2.35731	WBGene00004431	rpl-19	C09D4.5	Concise description: rpl-19 encodes a large ribosomal subunit L19 protein. Provisional description: rpl-19 encodes a large ribosomal subunit L19 protein. Detailed description: none available
266858	WBGene00006434	F09E5.15	Q8IG31	69	1.6887	4	2	0.116	9543	2.09578	QITINDLPVGR	GLFIIDPSQNLR	6	3	0.156	9547	3.14235	QITINDLPVGR	GLFIIDPSQNLR	2.61906	WBGene00006434	prdx-2	F09E5.15a	Concise description: prdx-2 encodes one of two C. elegans typical 2-Cys peroxiredoxins, peroxidase enzymes that reduce hydrogen peroxide and contribute to the oxidative-stress response of multicellular organisms; loss of prdx-2 activity results in increased sensitivity to sublethal doses of hydrogen peroxide and increased resistance to heavy metals, likely via increased expression of Phase II det…
172433	WBGene00003964	H06O01.1	G5ED07	49	1.6879	3	2	0.068	9543	1.57183	VADTERDRFSFAHTSNKDIIKK	GQSGPSSKELK	2	2	0.068	9547	1.04745	GQSGPSSKELK	VADTERDRFSFAHTSNKDIIKK	1.30964	WBGene00003964	pdi-3	H06O01.1	Concise description: pdi-3 encodes a protein disulfide isomerase (PDI) required for normal cuticle collagen deposition and, subliminally, for maintenance of normal body shape; PDI-3 has both PDI and calcium-dependent transglutaminase activity in vitro, crosslinking proteins through a gamma-glutamyl epsilon-lysine dual residue; PDI-3 is homologous to the human PDI ERp60, as well as a homolog in th…
179999	WBGene00001423	T01C3.7	Q22053	58	1.6809	4	4	0.17	9543	2.09578	KRPNVVPIVEDARHPHKYR	MVVGESVYGEKR	3	3	0.125	9547	1.57117	KRPNVVPIVEDARHPHKYR	GGLENTHIKPGTK	1.83347	WBGene00001423	fib-1	T01C3.7	Concise description: fib-1 encodes the C. elegans ortholog of Saccharomyces cerevisiae Nop1p, an essential component of the U3 SnoRNP; FIB-1 localizes to the nucleolus. Provisional description: fib-1 encodes the C. elegans ortholog of Saccharomyces cerevisiae Nop1p, an essential component of the U3 SnoRNP; FIB-1 localizes to the nucleolus. Detailed description: none available
3564970	WBGene00013025	Y49A3A.2	Q9XW92	64	1.6284	3	2	0.025	9543	1.57183	TALVANTSNMPVAAR	TALVANTSNMPVAAR	5	3	0.053	9547	2.61862	TALVANTSNMPVAAR	TALVANTSNMPVAAR	2.09523	WBGene00013025	vha-13	Y49A3A.2	Concise description: vha-13 encodes an ortholog of subunit A of the cytoplasmic (V1) domain of vacuolar proton-translocating ATPase (V-ATPase); VHA-13 is predicted to hydrolyse ATP as part of a cytosolic VHA-12/VHA-13 heterohexamer, whose activity drives the V-ATPase rotor; VHA-13 levels are lowered in mutants with either abnormally low or abnormally high calcineurin levels, and elevated in mutan…
180724	WBGene00003963	C07A12.4	G8JY07	62	1.5724	3	3	0.1	9543	1.57183	VVDYTGDRTIEGFTK	GKNFEQVAR	4	2	0.065	9547	2.0949	VVDYTGDRTIEGFTK	GKNFEQVAR	1.83336	WBGene00003963	pdi-2	C07A12.4a	Concise description: pdi-2 encodes a protein disulfide isomerase beta subunit; by homology, PDI-2 is predicted to function in oxidative protein folding in the endoplasmic reticulum (ER); PDI-2 activity is required for several organismal processes including body morphology, locomotion, fertility, molting, and collagen deposition; pdi-2 transcript levels are increased in response to ER stress; pdi-…
178778	WBGene00004422	T22F3.4	Q94300	63	1.5474	3	2	0.138	9543	1.57183	MTDVEKQTEIREK	VLEQLTGQTPVFSK	4	2	0.138	9547	2.0949	MTDVEKQTEIREK	VLEQLTGQTPVFSK	1.83336	WBGene00004422	rpl-11.1	T22F3.4	Concise description: rpl-11.1 encodes a large ribosomal subunit L11 protein. Provisional description: This gene encodes a protein predicted by Eisenberg and coworkers, with 52 percentage accuracy, to be mitochondrial. Proteins localized to a given organelle by experiments tend to share a characteristic phylogenetic distribution of their homologs, called a phylogenetic profile. For instance, mitoc…
173167	WBGene00006529	C47B2.3	P34690	56	1.5355	7	3	0.109	9543	3.66761	SIFVDLEPTVVDEIRTGTYKK	GHYTVGKELIDTVLDR								1.8338	WBGene00006529	tba-2	C47B2.3	Concise description: tba-2 encodes an alpha-tubulin. Provisional description: In large-scale RNAi assays, tba-2 was found to affect embryonic viability and spindle structure. Detailed description: none available
174311	WBGene00004421	F10B5.1	Q09533	66	1.1166	2	2	0.056	9543	1.04789	RSDGVGVQLQR	LRSDGVGVQLQR	2	2	0.056	9547	1.04745	RSDGVGVQLQR	LRSDGVGVQLQR	1.04767	WBGene00004421	rpl-10	F10B5.1	Concise description: rpl-10 encodes a large ribosomal subunit L10 protein required in mass RNAi assays for embryonic viability, fertility, normally rapid growth, and normal body coloration; the rpl-10 transcription unit has a nonsense transcript that is up-regulated in vivo by smg[-] mutations, indicating that rpl-10 is a natural substrate for SMG-mediated nonsense suppresssion; several other nat…
176756	WBGene00009952	F53A2.7	O45552	70	1.038								4	3	0.099	9547	2.0949	AQEAGVYKNEIVGITIK	KGEESFEIDEHPRATTAESLAK	1.04745	WBGene00009952	F53A2.7	F53A2.7	Concise description: none available Provisional description: none available Detailed description: none available
