# Supplementary material for: The LRR-TM protein PAN-1 interacts with MYRF to promote its nuclear translocation in synaptic remodeling
Source: eLife. 2021 May 5;10:e67628. doi: 10.7554/eLife.67628 (PMC8099431; doi:10.7554/eLife.67628)
Supplement: Supplementary file 3. [file elife-67628-supp3.xlsx]

## Sheet: PAN-1.final
Summary table of putative preys identified from PAN-1 Immunoprecipitation Mass Spectrometry (IP-MS) datasets with detailed information
Number of interacting preys: 268
Top 5% wd score threshold: 13
Top 10% wd score threshold: 26
Number of baits: 72 baits
Bait name: PAN-1
MS type: HCD-FTMS
Database-searching software: pFind 3.1 (http://pfind.ict.ac.cn/)
WD score: A scoring metrix for identifying high-confidence candidate interacting proteins (HCIPs) http://besra.hms.harvard.edu/ipmsmsdbs/cgi-bin/tutorial.cgi; Revised
This is a summary table in which the rows are the unique proteins (preys) identified from all IP-MS/MS experiments and the columns represent the statistics of this bait used for IPMS experimens.
Prey: NCBI Entrez gene ID.
WB_ID: Wormbase gene ID.
Tx_ID: stable transcript ID following the principles of parsimony to minimize confusion due to isoforms.
UP_ID: UniPort ID.
Freq(obs): the observed frequency of specific interacting protein across all baits.
Spec_rep1: the spectral count for specific interacting protein from particular bait's IP-MS/MS experiment(technical replicate 1).
Peptide_rep1: the peptide count for specific interacting protein from particular bait's IP-MS/MS experiment (technical replicate 1).
Coverage_rep1: the coverage for specific interacting protein from particular bait's IP-MS/MS experiment (technical replicate 1).
Spec_sum_rep1: the Total Spectral Count (TSC) for particular bait's IP-MS/MS experiment (technical replicate 1).
Norm_spec_rep1: the normalized spectral count (Spec_rep1/Spec_sum_rep1*5,000) for specific interacting protein from particular bait's IP-MS/MS experiment (technical replicate 1).
Pep_seq1_rep1: the amino acid sequence of the first peptide identified from particular bait's IP-MS/MS experiment (technical replicate 1).
Pep_seq2_rep1: the amino acid sequence of the second peptide identified from particular bait's IP-MS/MS experiment (technical replicate 1).
Spec_rep2: the spectral count for specific interacting protein from particular bait's IP-MS/MS experiment (technical replicate 2).
Peptide_rep2: the peptide count for specific interacting protein from particular bait's IP-MS/MS experiment (technical replicate 2).
Coverage_rep2: the coverage for specific interacting protein from particular bait's IP-MS/MS experiment (technical replicate 2).
Spec_sum_rep2: the Total Spectral Count (TSC) for particular bait's IP-MS/MS experiment(technical replicate 2).
Norm_spec_rep2: the normalized spectral count (Spec_rep2/Spec_sum_rep2*5,000) for specific interacting protein from particular bait's IP-MS/MS experiment (technical replicate 2).
Pep_seq1_rep2: the amino acid sequence of the first peptide identified from particular bait's IP-MS/MS experiment (technical replicate 2).
Pep_seq2_rep2: the amino acid sequence of the second peptide identified from particular bait's IP-MS/MS experiment (technical replicate 2).
Avg_norm_spec: the average of normalized spectral count for specific interacting protein from particular bait's IP-MS/MS experiment (all technical replicates).
Functional descriptions: the last four columns are gene functional descriptions downloaded from ftp://ftp.wormbase.org/pub/wormbase/species/c_elegans/annotation/geneIDs/.
Prey	WB_ID	Tx_ID	UP_ID	Freq(obs)	WD_score	Spec_rep1	Peptide_rep1	Coverage_rep1	Spec_sum_rep1	Norm_spec_rep1	Pep_seq1_rep1	Pep_seq2_rep1	Spec_rep2	Peptide_rep2	Coverage_rep2	Spec_sum_rep2	Norm_spec_rep2	Pep_seq1_rep2	Pep_seq2_rep2	Avg_norm_spec	Functional_descriptions
181229	WBGene00008999	F21A10.2	D9PTN5	3	2287.07	624	180	0.807	11862	263.025	TGVIAQELAAVLPDAVKDLGDYLTVNESR	LTGDLDQKIDDKVAEISQR	569	171	0.719	11290	251.993	TGVIAQELAAVLPDAVKDLGDYLTVNESR	TGVIAQELAAVLPDAVKDLGDYLTVNESR	257.509	WBGene00008999	F21A10.2	F21A10.2a	Concise description: none available Provisional description: none available Detailed description: none available
174614	WBGene00004134	F59B10.1	G5EFI7	3	2194.4	557	172	0.627	11862	234.783	APNLEHMAFETGVEIR	NGGALYTQGAVSVGTEHQVESAK	542	170	0.623	11290	240.035	APNLEHMAFETGVEIR	NGGALYTQGAVSVGTEHQVESAK	237.409	WBGene00004134	pqn-47	F59B10.1	Concise description: pqn-47 encodes a protein with a glutamine/asparagine-rich domain, homologous to human C11orf9 and Drosophila CG3328, that is required for locomotion, vulval development, full body size, cuticular integrity, and general health in mass RNAi assays; pqn-47(cxP5915) homozygotes are sluggish. Provisional description: The protein product of this gene is predicted to contain a gluta…
175596	WBGene00003915	M88.6	Q9U3A0	4	1724.28	909	243	0.699	11862	383.156	GFKEEFNAHKQPVCICADNGIFSTVK	GFKEEFNAHKQPVCICADNGIFSTVK	837	243	0.665	11290	370.682	GFKEEFNAHKQPVCICADNGIFSTVK	RSDSDLHKLIENDPLNIASDSILVVPAMPK	376.919	WBGene00003915	pan-1	M88.6a	Concise description: pan-1 encodes a novel predicted transmembrane protein with extracellular leucine-rich repeats; loss of PAN-1 activity via RNAi results in molting defects and arrested L2-sized larvae, indicating that PAN-1 is required for completion of the larval molts; pan-1 expression is enriched in the germline and upregulated in animals mutant for unc-95, which encodes a LIM domain-contai…
187255	WBGene00010731	K10C3.4	K10C3.4	3	1535.86	281	59	0.532	11862	118.445	TAAHLVSMAEKGAEDKLNIVDLKDHLMR	GAEDKLNIVDLKDHLMR	244	52	0.538	11290	108.06	TAAHLVSMAEKGAEDKLNIVDLKDHLMR	YKELMQKPLNEMNLHLVTIR	113.252	WBGene00010731	K10C3.4	K10C3.4a	Concise description: none available Provisional description: none available Detailed description: none available
172410	WBGene00001075	H27M09.4	G5EEB6	1	744.846	4	3	0.081	11862	1.68606	KGETGGQGPIGSK	KGETGGQGPIGSK	3	2	0.04	11290	1.32861	KGETGGQGPIGSK	KGETGGQGPIGSK	1.50734	WBGene00001075	dpy-14	H27M09.4	Concise description: dpy-14 encodes a type III (alpha 1) collagen that is required for embryonic, larval, and vulval development, proper amphid morphology, and regulation of body shape and size; a dpy-14 promoter-GFP fusion construct is reportedly expressed in embryonic neurons. Provisional description: dpy-14 encodes a type III (alpha 1) collagen that is required for embryonic, larval, and vulva…
185896	WBGene00009804	F47B8.3	F47B8.3	2	594.047	12	4	0.225	11862	5.05817	LKPELESEAGEEDLGVK	LNPFDVPTFETLEEDTANPEKLPVSR	6	2	0.12	11290	2.65722	LKPELESEAGEEDLGVK	QTAQREEESEIRNDNSK	3.8577	WBGene00009804	F47B8.3	F47B8.3	Concise description: none available Provisional description: none available Detailed description: none available
173511	WBGene00018974	F56D12.6	H2KYR2	1	486.463	2	2	0.017	11862	0.843028	KVLQENLKK	VELKVAR	1	1	0.007	11290	0.44287	VELKVAR	NA	0.642949	WBGene00018974	F56D12.6	F56D12.6a	Concise description: none available Provisional description: none available Detailed description: none available
172225	WBGene00018892	F55F8.4	G5EBE3	2	442.882	5	3	0.013	11862	2.10757	FQNFMSK	QNFMSK	5	3	0.013	11290	2.21435	FQNFMSK	QNFMSK	2.16096	WBGene00018892	cir-1	F55F8.4	Concise description: cir-1 is a nuclear protein homologous to mammalian CIR, a component of the co-repressor complex which associates with CBF1 in mammals (OMIM:605228); cir-1 is required for larval and different aspects of germ line development from proliferation and gonad extension, to progression of meiosis; cir-1 mutants cause 90 percentage of larvae to cease development at larval stage1, esc…
177505	WBGene00018350	F42C5.10	Q20330	4	128.648	4	3	0.033	11862	1.68606	ASVVQDSHDESR	EYEEEHAYEEIQESK	6	4	0.042	11290	2.65722	ASVVQDSHDESR	EYEEEHAYEEIQESK	2.17164	WBGene00018350	ttm-4	F42C5.10	Concise description: none available Provisional description: none available Detailed description: none available
181284	WBGene00011880	T21B6.3	T21B6.3	9	42.1028	7	2	0.022	11862	2.9506	QREQQQQQQQQQQQQQQR	EQQQQQQQQQQQQQQR	7	3	0.039	11290	3.10009	EQQQQQQQQQQQQQQR	QREQQQQQQQQQQQQQQR	3.02535	WBGene00011880	T21B6.3	T21B6.3	Concise description: The protein product of this gene is predicted to contain a glutamine/asparagine (Q/N)-rich ('prion') domain, by the algorithm of Michelitsch and Weissman (as of the WS77 release of WormBase, i.e., in wormpep77). Provisional description: Proteins bearing such domains can sometimes stably exist in at least two distinct physical states, each associated with a different phenotype…
266835	WBGene00022749	ZK484.3	ZK484.3	12	38.5312	11	6	0.27	11862	4.63665	VPSTSSTASASAPAPVKK	ASLNEANQQGIKVPSTSSTASASAPAPVKK	8	5	0.266	11290	3.54296	VPSTSSTASASAPAPVKK	ASLNEANQQGIKVPSTSSTASASAPAPVKK	4.08981	WBGene00022749	ZK484.3	ZK484.3	Concise description: none available Provisional description: none available Detailed description: none available
187585	WBGene00002057	R04E5.10	Q86DC6	12	35.9406	11	7	0.172	11862	4.63665	HLSDLESETAYIKR	TSYQSDFVIDTPSPLMR	16	9	0.165	11290	7.08592	IIEHKDESIVIENSNSYK	HLSDLESETAYIKR	5.86128	WBGene00002057	ifd-1	R04E5.10a	Concise description: ifd-1 encodes two isoforms of a nonessential intermediate filament protein; IFD-1 is predicted to function as a structural component of the cytoskeleton; IFD-1 has no obvious function in RNAi assays. Provisional description: Based on sequence similarity, the C. elegans intermediate filament protein family is comprised of five distinct subfamilies, A, B, C, D, and E. IFD-1 and…
174743	WBGene00006915	VW02B12L.1	G5EGP4	13	34.3368	15	6	0.067	11862	6.32271	AVLEHVTSLLDPHSKR	KINFVEDEITKDLVPIPDYDEHIPAPQPK	12	4	0.067	11290	5.31444	KINFVEDEITKDLVPIPDYDEHIPAPQPK	AVLEHVTSLLDPHSKR	5.81858	WBGene00006915	vha-6	VW02B12L.1	Concise description: vha-6 encodes an ortholog of subunit a of the membrane-bound (V0) domain of vacuolar proton-translocating ATPase (V-ATPase); VHA-6 is orthologous to human ATP6N1A (OMIM:192130), ATP6V0A2, ATP6V0A4 (OMIM:605239, mutated in distal renal tubular acidosis), and TCIRG1 (OMIM:604592, mutated in osteopetrosis); VHA-6 is expressed in germline (P2 through Z3 cells until the comma stag…
181148	WBGene00000100	C25A11.4	H2KYC5	8	30.6788	1	1	0.017	11862	0.421514	SSLHQTGQQETSNR	NA	4	3	0.039	11290	1.77148	SSLHQTGQQETSNR	REQQNLSER	1.0965	WBGene00000100	ajm-1	C25A11.4a	Concise description: ajm-1 encodes a member of the apical junction molecule class that is required for correct elongation of the C. elegans embryo; AJM-1 contains a coiled-coil motif; AJM-1 binds DLG-1 in vitro, in yeast two-hybrid assays, and in vivo; AJM-1 is mislocalized in a dlg-1(RNAi) background; LET-413 is required for rapid confinement of DLG-1 and AJM-1 to a narrow apical region in C. el…
173973	WBGene00002054	F10C1.7	M1Z854	32	28.641	115	49	0.611	11862	48.4741	TTTTTSSSSHGGVSAGHAAEEFVASAER	YIILENTSGSVAEDVSNFEIR	117	48	0.582	11290	51.8158	TTTTTSSSSHGGVSAGHAAEEFVASAER	EISEAHSGTIGVEVK	50.145	WBGene00002054	ifb-2	F10C1.7a	Concise description: ifb-2 encodes a nonessential intermediate filament protein; IFB-2 is predicted to function as a structural component of the cytoskeleton; IFB-2 has no obvious function in RNAi assays. Provisional description: Based on sequence similarity, the C. elegans intermediate filament protein family is comprised of five distinct subfamilies, A, B, C, D, and E. IFB-2, along with IFB-1, …
180414	WBGene00002056	M6.1	G8JY94	12	26.9554	8	3	0.055	11862	3.37211	LIDDLKNNEEAK	HILEQTTAHR	7	4	0.077	11290	3.10009	VNPDLYKEELISIR	AHREDHDVDLDR	3.2361	WBGene00002056	ifc-2	M6.1a	Concise description: ifc-2 encodes three isoforms of an intermediate filament protein dispensable for viability but required for normal movement, growth rate, body size, body shape, and cuticle strength; IFC-2 is present in the cytoplasm of intestinal cells, and at the desmosomes of intestinal and pharyngeal cells. Provisional description: ifc-2 encodes three isoforms of an intermediate filament …
175227	WBGene00003936	T17H7.4	H2KYY8	23	23.6043	11	5	0.07	11862	4.63665	IGEQKPNSELNLGK	IGEQKPNSELNLGK	14	7	0.096	11290	6.20018	IGEQKPNSELNLGK	MTSHIATETSVNR	5.41842	WBGene00003936	pat-12	T17H7.4a	Concise description: pat-12 encodes several isoforms containing a novel hemidesmosome component that has strong homology to antigen B20 from filarial nematode onchocerca volvulus, which partly protects different hosts against infection when used for immunization; PAT-12 activity is important to maintain FO integrity and might have distinct functions apically and basally based on differential loss…
180819	WBGene00001006	C25F6.2	G5ECY0	11	23.1235	4	3	0.036	11862	1.68606	RNDVIAQSR	INDELVNRDPSK	3	3	0.022	11290	1.32861	VVEHTGVIDDHGR	HGNEELR	1.50734	WBGene00001006	dlg-1	C25F6.2a	Concise description: dlg-1 encodes a MAGUK protein, orthologous to Drosophila Discs large; DLG-1 is physically located at apical adherens junctions in all epithelia and is required for organization of the embryonic gut epithelium into a coherent tube. Provisional description: Loss of dlg-1 activity differentially affects localisation of proteins normally enriched apically to the zonula adherens. …
173058	WBGene00006876	ZK1151.1	G5EFM4	36	20.8112	63	38	0.141	11862	26.5554	STSQVHSVELEPHAEFVGIDR	FEDALQALDSDVANVK	59	36	0.124	11290	26.1293	LGQYSDGIVGIHGPGIK	STSQVHSVELEPHAEFVGIDR	26.3423	WBGene00006876	vab-10	ZK1151.1a	Concise description: vab-10 encodes, by alternative splicing, two spectraplakins (VAB-10A and VAB-10B) that are jointly required for mechanical resilience of the epidermis under strain by the contraction of actin microfilaments mechanically linked to fibrous organelles (FOs); VAB-10A/B are, accordingly, required for elongation during embryonic morphogenesis; VAB-10A has C-terminal plectin repeats…
181168	WBGene00016006	C23F12.1	A0A0K3AVH8	12	19.8879	2	2	0.011	11862	0.843028	GRQDDIDEVSR	LHKYPEEPTIALGEK	1	1	0.005	11290	0.44287	GRQDDIDEVSR	NA	0.642949	WBGene00016006	fln-2	C23F12.1a	Concise description: none available Provisional description: none available Detailed description: none available
179676	WBGene00003515	K12F2.1	P12844	56	19.5383	164	60	0.325	11862	69.1283	NAILQSEKDELAQQAEAAER	KLESDINDLEIALDHANR	167	64	0.327	11290	73.9593	KLNEDLQSEEDKVNHLEK	KLESDINDLEIALDHANR	71.5438	WBGene00003515	myo-3	K12F2.1	Concise description: myo-3 encodes MHC A, the minor isoform of MHC (myosin heavy chain) that is essential for thick filament formation, and for viability, movement, and embryonic elongation; expressed in body muscle, the somatic sheath cell covering the hermaphrodite gonad, and also expressed in enteric muscle, vulval muscles of the hermaphrodite and the diagonal muscles of the male tail. Provisi…
24104769	WBGene00001572	M03A8.4	G4SI07	17	19.047	10	6	0.203	11862	4.21514	TEETTEEQFAPHAPYK	SQTSQEKEEIR	11	7	0.205	11290	4.87157	SDPFPATTRPASGLGGDGGNPFGGSQSNLGPK	TEETTEEQFAPHAPYK	4.54336	WBGene00001572	gei-15	M03A8.4	Concise description: none available Provisional description: none available Detailed description: none available
179534	WBGene00000064	T04C12.5	P10984	58	19.005	434	128	0.763	11862	182.937	HQGVMVGMGQKDSYVGDEAQSKR	HQGVMVGMGQKDSYVGDEAQSKR	430	122	0.723	11290	190.434	KDLYANTVLSGGTTMYPGIADR	HQGVMVGMGQKDSYVGDEAQSKR	186.685	WBGene00000064	act-2	T04C12.5	Concise description: act-2 encodes an invertebrate actin that may function specifically in the pharynx. Provisional description: The act-2 gene, embedded in the 11-kb gene cluster act-123, encodes an typical invertebrate actin highly similar to ACT-1, ACT-3, and ACT-4; a single mutant allele of act-2 has been isolated on the basis of defective feeding (an Eat phenotype), as part of a double mutan…
187645	WBGene00001784	R07B1.4	Q09607	71	18.6547	846	197	0.881	11862	356.601	LLFHLADEKFDDERFGMEQWGVLK	LDMIAEVIQEFMSSSGMGK	723	171	0.852	11290	320.195	VLLGMIQANKEQFFKENVLPDVEK	LDMIAEVIQEFMSSSGMGK	338.398	WBGene00001784	gst-36	R07B1.4	Concise description: none available Provisional description: none available Detailed description: none available
173805	WBGene00001976	T05A7.4	G5EEL9	35	17.495	13	6	0.307	11862	5.47968	SYAEDVAATKPAKTDVATPALAALTGEK	SPVASSSADASPKR	12	5	0.307	11290	5.31444	SPVASSSADASPKR	SYAEDVAATKPAK	5.39706	WBGene00001976	hmg-11	T05A7.4	Concise description: none available Provisional description: none available Detailed description: none available
179106	WBGene00017317	F09G2.9	O17406	14	17.4166	3	2	0.051	11862	1.26454	KSEEAPAPEEK	KTEEPVVEAK	2	1	0.027	11290	0.88574	KSEEAPAPEEK	NA	1.07514	WBGene00017317	attf-2	F09G2.9	Concise description: none available Provisional description: none available Detailed description: none available
186386	WBGene00010152	F56D5.9	F56D5.9	2	16.0159	4	3	0.019	11862	1.68606	LSDEIK	ILIIIII								0.84303	WBGene00010152	F56D5.9	F56D5.9	Concise description: none available Provisional description: none available Detailed description: none available
181340	WBGene00009259	F29G6.3	Q6A2D2	18	15.9976	9	5	0.104	11862	3.79363	HQDVVVEQTQFQK	GVIVGNVVGHDAVIQR	8	5	0.076	11290	3.54296	HQDVVVEQTQFQK	GVIVGNVVGHDAVIQR	3.6683	WBGene00009259	hpo-34	F29G6.3a	Concise description: none available Provisional description: none available Detailed description: none available
177482	WBGene00000942	ZC477.9	V6CK82	25	14.8213	18	10	0.136	11862	7.58725	TIENILEPVAQQVSR	SVNASPPTAPIIHNK	16	8	0.109	11290	7.08592	ALPEDAQSIKR	VLMTAQNEADNSEEPSFVSR	7.33659	WBGene00000942	deb-1	ZC477.9a	Concise description: The deb-1 gene encodes a vinculin ortholog highly conserved amongst metazoans including Drosophila, chick, and humans (OMIM:193065); DEB-1 is a muscle attachment protein found in dense bodies, and is required for attaching actin thin filaments to the basal sarcolemma; DEB-1 requires PAT-4/integrin-linked kinase for full assembly into nascent attachments. Provisional descripti…
174839	WBGene00012459	Y17G7B.3	Y17G7B.3	37	14.6899	28	11	0.396	11862	11.8024	HGDMAEFAGLQIK	NLPVETQIFPGHEYTVANLK	28	10	0.423	11290	12.4004	HGDMAEFAGLQIK	SIGTCDAVVGMAK	12.1014	WBGene00012459	Y17G7B.3	Y17G7B.3	Concise description: Y17G7B.3 is orthologous to the human gene HYDROXYACYLGLUTATHIONE HYDROLASE (HAGH; OMIM:138760), which when mutated leads to disease. Provisional description: Y17G7B.3 is orthologous to the human gene HYDROXYACYLGLUTATHIONE HYDROLASE (HAGH; OMIM:138760), which when mutated leads to disease. Detailed description: none available
175384	WBGene00002915	H19M22.2	Q9UB29	33	14.5978	25	14	0.049	11862	10.5379	EAAHQSSSYLQTGGTLSR	INNYTSSSNDRGQGDVVEEK	31	17	0.058	11290	13.729	INNYTSSSNDRGQGDVVEEK	EAAHQSSSYLQTGGTLSR	12.1334	WBGene00002915	let-805	H19M22.2a	Concise description: let-805 encodes myotactin, a novel single-transmembrane protein containing extracellular fibronectin repeats; genetic analyses indicate that LET-805 is essential for proper association between hypodermal fibrous organelles and the contractile apparatus of muscle cells; LET-805 is expressed in hypodermal cells and in the pharynx and localizes to basolateral membranes. Provisio…
186951	WBGene00019361	K03E5.2	K03E5.2	13	14.0459	3	2	0.282	11862	1.26454	IAAVEVPSNEQLER	MTSPVPPTHQEAGLK	2	2	0.282	11290	0.88574	IAAVEVPSNEQLER	MTSPVPPTHQEAGLK	1.07514	WBGene00019361	K03E5.2	K03E5.2a	Concise description: none available Provisional description: none available Detailed description: none available
180767	WBGene00000066	M03F4.2	Q6A8K1	46	13.8604	463	135	0.782	11862	195.161	HQGVMVGMGQKDSYVGDEAQSKR	HQGVMVGMGQKDSYVGDEAQSKR								97.5805	WBGene00000066	act-4	M03F4.2a	Concise description: act-4 encodes an actin isoform that is most similar to act-2 in amino acid sequence; an act-4 reporter gene is expressed in body wall and vulval muscles and the spermatheca. Provisional description: act-4 encodes an actin isoform that is most similar to act-2 in amino acid sequence; an act-4 reporter gene is expressed in body wall and vulval muscles and the spermatheca. Detai…
259839	WBGene00006789	F11C3.3	P02566	70	13.2839	389	123	0.497	11862	163.969	ATLLQSEKEELLVANEAAER	RLEIEKEELQHALDEAEAALEAEESK	383	118	0.481	11290	169.619	KLEGDINELEIALDHANKANADAQK	ATLLQSEKEELLVANEAAER	166.794	WBGene00006789	unc-54	F11C3.3	Concise description: unc-54 encodes a muscle myosin class II heavy chain (MHC B); UNC-54 is the major myosin heavy chain expressed in C. elegans and is required for locomotion and egg-laying; in vivo and in vitro, UNC-54 interacts with ITR-1, an IP3 receptor, and this interaction may provide a link between calcium signaling and the muscle cytoskeleton; UNC-54 is a thick filament component that is…
172491	WBGene00006754	F07A5.7	B3WFV3	64	12.9777	161	55	0.595	11862	67.8638	QLQVQIQEAEAAALLGGKR	AAERFEAQANELANKVEDLNKHVNDLAQQR	132	52	0.562	11290	58.4588	QLQVQIQEAEAAALLGGKR	NKLETELSTAQADLDEVTKELHAADER	63.1613	WBGene00006754	unc-15	F07A5.7a	Concise description: The unc-15 gene encodes a paramyosin ortholog; UNC-15 protein physically interacts with MHC A, one isoform of myosin heavy chain (MHC) in striated muscle; UNC-15 accumulation is decreased in the absence of UNC-54 (myosin B), implying that degradation of UNC-15 is inhibited by its binding myosin B; conversely, myosin B (but not MYO-3/myosin A) fails to accumulate in unc-15 mut…
176793	WBGene00000067	T25C8.2	O45815	70	12.9674	283	79	0.656	11862	119.288	HQGVMVGMGQKDSYVGDEAQSKR	HQGVMVGMGQKDSYVGDEAQSKR	280	76	0.619	11290	124.004	HQGVMVGMGQKDSYVGDEAQSKR	HQGVMVGMGQKDSYVGDEAQSKR	121.646	WBGene00000067	act-5	T25C8.2	Concise description: an ortholog of human cytoplasmic actin; and is expressed only in microvillous intestinal cells and excretory cell. Provisional description: an ortholog of human cytoplasmic actin; and is expressed only in microvillous intestinal cells and excretory cell. Detailed description: none available
177212	WBGene00019947	R08C7.3	Q27511	39	12.812	18	6	0.257	11862	7.58725	KGAPVPGKPGAPGQGPQ	KGAPVPGKPGAPGQGPQ	21	6	0.257	11290	9.30027	KGAPVPGKPGAPGQGPQ	KGAPVPGKPGAPGQGPQ	8.44376	WBGene00019947	htz-1	R08C7.3	Concise description: htz-1 encodes the C. elegans ortholog of the H2A.Z histone variant; htz-1 is an essential gene and during development, HTZ-1 functions with the PHA-4/FoxA transcription factor and the MYS-1/TIP60-SSL-1/SWR1 remodeling complex to regulate gene expression during pharyngeal (foregut) organogenesis; a YFP::HTZ-1 fusion protein localizes to pharyngeal gene promoters at the onset o…
184239	WBGene00001699	F09D12.1	O44471	18	12.6383	6	2	0.382	11862	2.52908	GAEGSLGGKFETVVAHDDFAYK	SSLGGSDLVGSAGDIQK	6	2	0.382	11290	2.65722	SSLGGSDLVGSAGDIQK	GAEGSLGGKFETVVAHDDFAYK	2.59315	WBGene00001699	grd-10	F09D12.1	Concise description: grd-10 encodes a hedgehog-like protein, with an N-terminal signal sequence and a C-terminal Ground domain; GRD-10 is expressed in seam cells; the Ground domain is predicted to form a cysteine-crosslinked protein involved in intercellular signalling, and it has subtle similarity to the N-terminal Hedge domain of HEDGEHOG proteins; GRD-10 is weakly required for normal molting; …
181348	WBGene00001502	F52D10.3	Q95ZT1	67	12.3266	16	8	0.399	11862	6.74423	SQQSYQEAFDIAKDK	YLAEVASGDDRNSVVEK	22	9	0.399	11290	9.74314	SQQSYQEAFDIAKDK	YLAEVASGDDRNSVVEK	8.24368	WBGene00001502	ftt-2	F52D10.3a	Concise description: none available Provisional description: none available Detailed description: none available
174805	WBGene00009691	F44E5.4	F44E5.4	38	12.028	12	5	0.062	11862	5.05817	ARFEELCADLFR	TTPSYVAFTDTER	14	7	0.085	11290	6.20018	ARFEELCADLFR	IINEPTAAALAYGLDK	5.62918	WBGene00009691	F44E5.4	F44E5.4	Concise description: F44E5.4 encodes a member of the Hsp70 family of heat shock proteins; as loss of F44E5.4 activity via large-scale RNAi screens results in no obvious defects, the precise role of F44E5.4 in C. elegans development and/or behavior is not yet known. Provisional description: F44E5.4 encodes a member of the Hsp70 family of heat shock proteins; as loss of F44E5.4 activity via large-s…
179069	WBGene00020808	T25F10.6	H2L0M6	58	11.6403	85	28	0.515	11862	35.8287	EADHANQTGMTAFGTPR	QVYTPFTDDTHEDLPADIAR	75	27	0.502	11290	33.2152	QVYTPFTDDTHEDLPADIAR	EADHANQTGMTAFGTPR	34.5219	WBGene00020808	T25F10.6	T25F10.6a	Concise description: none available Provisional description: none available Detailed description: none available
181044	WBGene00001169	R03G5.1	G8JY74	72	10.8092	277	76	0.635	11862	116.759	TIEKFEKEAQEMGK	SGDAGIVELIPTKPLCVESFTDYAPLGR	264	73	0.652	11290	116.918	TIEKFEKEAQEMGK	VETGIIKPGMVVTFAPQNVTTEVK	116.838	WBGene00001169	eef-1A.2	R03G5.1a	Concise description: eft-4 encodes a translation elongation factor 1-alpha homolog that is required for embryonic viability, fertility, and a normal postembryonic growth rate; eft-4 encodes at least one alternatively spliced coding sequence identical to that of eft-3. Provisional description: Paralogs are encoded by H19N07.1, K07A12.4, and other genes. Detailed description: none available
172397	WBGene00006819	F08B6.4	Q6LD30	42	10.7838	59	16	0.444	11862	24.8693	PPTEDQVVAEEQPNATMETK	PPTEDQVVAEEQPNATMETK	56	17	0.337	11290	24.8007	NTTFEAEGGELPYEAMK	PPTEDQVVAEEQPNATMETK	24.835	WBGene00006819	unc-87	F08B6.4a	Concise description: unc-87 encodes, through alternative splicing, two proteins that are required to maintain the structure of myofilaments in body wall muscle cells; UNC-87 proteins resemble the C-terminal repeat region of calponin but have no obvious orthologs outside of nematodes; in vitro, UNC-87 proteins exist as monomers in solution, associate with thin (F-actin) filaments but not with mono…
181031	WBGene00016898	C53C9.2	C53C9.2	25	10.4554	8	5	0.191	11862	3.37211	QAGDYGLASQAGEVSMGGHR	IEGLELGEDILR	6	3	0.116	11290	2.65722	SEGIVPLQSGTNK	IEGLELGEDILR	3.01466	WBGene00016898	C53C9.2	C53C9.2	Concise description: none available Provisional description: none available Detailed description: none available
179190	WBGene00019064	F58G4.1	Q21000	34	10.3424	22	9	0.034	11862	9.27331	IQEKEEEFENTRK	IQEKEEEFENTR	28	13	0.048	11290	12.4004	LQEKEEEFENTRK	LQEKEEEFENTR	10.8369	WBGene00019064	myo-5	F58G4.1	Concise description: none available Provisional description: none available Detailed description: none available
184918	WBGene00017771	F25B4.8	F25B4.8	55	10.2751	105	31	0.721	11862	44.259	SNPDAVAIMPHCIDGK	MSEVQHFGSCHCGAVK	104	32	0.721	11290	46.0585	SNPDAVAIMPHCIDGK	SEVQHFGSCHCGAVK	45.1587	WBGene00017771	F25B4.8	F25B4.8a	Concise description: none available Provisional description: none available Detailed description: none available
179533	WBGene00000063	T04C12.6	P0DM41	71	10.0969								454	127	0.742	11290	201.063	KDLYANTVLSGGTTMYPGIADR	HQGVMVGMGQKDSYVGDEAQSKR	100.531	WBGene00000063	act-1	T04C12.6	Concise description: act-1 encodes an actin isoform that is required for proper body wall muscle and pharyngeal muscle structures and the motility of animals; actins have highly similar amino acid sequences; ACT-1 is identical to ACT-3; act-1 functions redundantly with two other actin isoforms, act-2 and act-3, to control cytoplasmic microfilament function in the early embryo. Provisional descrip…
174467	WBGene00000170	C01G6.1	Q17571	28	9.5694	14	7	0.155	11862	5.9012	YVVLTGNQELKPLTAK	TGNQELKPLTAK	13	6	0.081	11290	5.75731	YVVLTGNQELKPLTAK	TGNQELKPLTAK	5.82925	WBGene00000170	aqp-2	C01G6.1a	Concise description: aqp-2 encodes, by alternative splicing, two isoforms of an biochemically atypical aquaglyceroporin; when expressed in Xenopus oocytes, AQP-2 increases water permeability 5- to 11-fold, and urea permeability 4.5-fold, but has no effect on glycerol permeability; AQP-2::GFP fusion proteins are expressed predominantly in the excretory cell and more weakly in muscle, motor neurons…
178507	WBGene00002005	F26D10.3	P09446	72	9.5064	205	63	0.555	11862	86.4104	SLGIETAGGVMTALIKR	MVNEAEKYKADDEAQKDR	213	66	0.564	11290	94.3313	MVNEAEKYKADDEAQKDR	SLGIETAGGVMTALIKR	90.3709	WBGene00002005	hsp-1	F26D10.3	Concise description: hsp-1 encodes hsp70A, a member of the heat shock family of proteins; hsp70A is closely related to the Drosophila heat inducible hsp70s and the S. cerevisiae SSA hsp70 subfamily; the hsp-1 gene is normally expressed throughout development and upon heat-shock the hsp-1 mRNA is enhanced 2-6 fold; down-regulation of hsp-1 via RNA interference results in a small reduction in the l…
172300	WBGene00020379	T09B4.5	T09B4.5	24	9.436	5	2	0.092	11862	2.10757	TIEVADDEDEVTTPSR	SASTPSASSTSVKR	5	3	0.092	11290	2.21435	TIEVADDEDEVTTPSR	STPSASSTSVKR	2.16096	WBGene00020379	T09B4.5	T09B4.5a	Concise description: none available Provisional description: none available Detailed description: none available
3564957	WBGene00019017	F57F4.4	F57F4.4	28	9.396	11	4	0.023	11862	4.63665	TISTDKDITGYCCTTGTNCNVK	STSVPSLQTGAEQLCDGK	12	5	0.027	11290	5.31444	TISTDKDITGYCCTTGTNCNVK	STSVPSLQTGAEQLCDGK	4.97555	WBGene00019017	F57F4.4	F57F4.4	Concise description: none available Provisional description: none available Detailed description: none available
179796	WBGene00001137	B0365.3	P90735	46	9.1333	54	22	0.248	11862	22.7618	GFKFDVEEVNFPLK	KQELHDLKQEVK	60	25	0.286	11290	26.5722	SVGIISDGTETVEDIAIRR	GFKFDVEEVNFPLK	24.667	WBGene00001137	eat-6	B0365.3	Concise description: eat-6 encodes an ortholog of the alpha subunit of a sodium/potassium ATPase, which in turn affects Na+,K(+)-ATPase activity of membranes by affecting the level of the phosphorylated intermediate of the Na+,K(+)-ATPase; EAT-6 affects relaxation of the pharyngeal muscles, fertility (and thus affects feeding); EAT-6 also affects body length, life span, and ASE, ASI and ASJ axona…
177369	WBGene00004112	C46G7.4	V6CKH6	24	9.1148	5	4	0.085	11862	2.10757	ETQTSADPGRETALLKEEEKR	SIPVQNYQSSNYNK	7	5	0.117	11290	3.10009	ETQTSADPGRETALLKEEEKR	VVETPLEPGVISR	2.60383	WBGene00004112	pqn-22	C46G7.4a	Concise description: The protein product of this gene is predicted to contain a glutamine/asparagine (Q/N)-rich ('prion') domain, by the algorithm of Michelitsch and Weissman (as of the WS77 release of WormBase, i.e., in wormpep77). Provisional description: Proteins bearing such domains can sometimes stably exist in at least two distinct physical states, each associated with a different phenotype…
181531	WBGene00010605	K06G5.1	K06G5.1	24	8.9336	7	3	0.086	11862	2.9506	GTDADCSCYNKR	TTQGSDGLAALNSLAK	6	3	0.086	11290	2.65722	GTDADCSCYNKR	TVFYELEVEKDFLK	2.80391	WBGene00010605	K06G5.1	K06G5.1a	Concise description: none available Provisional description: none available Detailed description: none available
180612	WBGene00017892	F28B4.3	F28B4.3	25	8.8905	9	3	0.019	11862	3.79363	HVGEDEFGNTFQR	QNSDTVNQLIANLK	6	3	0.02	11290	2.65722	HVGEDEFGNTFQR	QNSDTVNQLIANLK	3.22542	WBGene00017892	F28B4.3	F28B4.3	Concise description: none available Provisional description: none available Detailed description: none available
175026	WBGene00001889	ZK131.9	P04255	60	8.8696	37	18	0.549	11862	15.596	AMSIMNSFVNDVFER	VRLILPGELAKHAVSEGTKAVTKYTSSK	30	15	0.623	11290	13.2861	AMSIMNSFVNDVFER	VRLILPGELAKHAVSEGTKAVTKYTSSK	14.4411	WBGene00001889	his-15	ZK131.9	Concise description: his-15 encodes an H2B histone. Provisional description: his-15 encodes an H2B histone. Detailed description: none available
173976	WBGene00002053	F10C1.2	Q19289	63	8.8096	97	42	0.538	11862	40.8869	THSLQQQENTDSTR	EIVYSIPANVVIKPGK	97	40	0.516	11290	42.9584	THSLQQQENTDSTR	EIVYSIPANVVIKPGK	41.9226	WBGene00002053	ifb-1	F10C1.2a	Concise description: ifb-1 (also known as vab-21) encodes two isoforms of an essential intermediate filament protein that is coexpressed with the essential IF proteins IFA-1, IFA-2, and IFA-3, along with IFA-4; IFB-1 is required for embryonic development and epidermal morphogenesis; IFB-1 forms heteropolymeric intermediate filaments in vitro with an equimolar mixture of IFA-1, IFA-2, or IFA-3, an…
172127	WBGene00003934	F54C1.7	G5EF37	45	8.7469	22	10	0.373	11862	9.27331	TVANTVDKETLEKELR	FDKEGNGYISRPTLK	21	9	0.373	11290	9.30027	TVANTVDKETLEKELR	LFDKEGNGYISRPTLK	9.28679	WBGene00003934	pat-10	F54C1.7	Concise description: pat-10 encodes body wall muscle troponin C, the calcium-binding component of the troponin complex of actin thin filaments; PAT-10 is essential for muscle contraction and thus for completion of embryonic morphogenesis and elongation; by homology, PAT-10 likely functions to regulate body wall muscle contraction in response to changes in intracellular calcium; PAT-10 is expresse…
175768	WBGene00003371	F09F7.2	G8JY79	70	8.6914	138	33	0.778	11862	58.1689	LSADEADELLKGVEDGEGMVKYEDFIKK	APPSQDVLKEIFNLYDEELDGKIDGTQVGDVAR	114	30	0.81	11290	50.4872	LSADEADELLKGVEDGEGMVKYEDFIKK	LSADEADELLKGVEDGEGMVKYEDFIKK	54.328	WBGene00003371	mlc-3	F09F7.2a	Concise description: mlc-3 encodes an essential myosin light chain; large-scale RNAi screens indicate that mlc-3 activity is required for both embryonic and postembryonic development, as well as for normal locomotion and egg laying. Provisional description: mlc-3 encodes an essential myosin light chain; large-scale RNAi screens indicate that mlc-3 activity is required for both embryonic and poste…
179162	WBGene00003242	C37C3.6	O76840	49	8.6556	15	7	0.048	11862	6.32271	NLSPGYHDIIKLPEGATNIK	SEKEGEEGKLLAADACPADEQEKFDTER	19	9	0.063	11290	8.41453	SEKEGEEGKLLAADACPADEQEKFDTER	AADACPADEQEKFDTER	7.36862	WBGene00003242	mig-6	C37C3.6a	Concise description: mig-6 encodes at least two protein isoforms (long and short) that are highly similar to the extracellular matrix proteins papilin and lacunin; mig-6 is an essential gene required for embryonic hypodermal cell enclosure and normal excretory canal cell function in L1 larvae; MIG-6(S) activity is required cell nonautonomously for the ventral to dorsal phase of distal tip cell (D…
175028	WBGene00001886	ZK131.6	P09588	48	8.4599	16	8	0.449	11862	6.74423	NDEELNKLLAGVTIAQGGVLPNIQAVLLPK	YLAAEVLELAGNAAR	12	6	0.291	11290	5.31444	AGLQFPVGR	AGLQFPVGR	6.02933	WBGene00001886	his-12	ZK131.6	Concise description: his-12 encodes an H2A histone; his-12 is contained within the histone gene cluster HIS3. Provisional description: his-12 encodes an H2A histone; his-12 is contained within the histone gene cluster HIS3. Detailed description: none available
178614	WBGene00000552	T21H3.3	A0A0K3AVX0	34	8.1567	3	2	0.208	11862	1.26454	MADQLTEEQIAEFK	MADQLTEEQIAEFKEAFSLFDKDGDGTITTK	6	3	0.208	11290	2.65722	EAFSLFDKDGDGTITTK	MADQLTEEQIAEFK	1.96088	WBGene00000552	cmd-1	T21H3.3	Concise description: cmd-1 encodes a putative homolog of calmodulin 1 that affects growth rate and fertility. Provisional description: cmd-1 encodes a putative homolog of calmodulin 1 that affects growth rate and fertility. Detailed description: none available
177089	WBGene00003153	Y67D8C.10	B7CED8	26	7.7119	4	3	0.038	11862	1.68606	EVVAVTGDGTNDGPALK	LKTDPNNGLPNNEEELER	8	6	0.069	11290	3.54296	EVVAVTGDGTNDGPALK	EKIETDYGGTTGLCER	2.61451	WBGene00003153	mca-3	Y67D8C.10a	Concise description: mca-3 encodes one of three C. elegans plasma membrane Ca2+ ATPases (PMCAs); by homology, MCA-3 is predicted to function as a molecular pump that couples ATP hydrolysis to extrusion of cytosolic Ca2+; mca-3 activity is required for coelomoycte endocytosis, normal coordinated locomotion, and embryonic and larval development; in regulating endocytosis, MCA-3 is required specific…
172471	WBGene00002348	R06C7.10	P02567	55	7.5959	82	34	0.198	11862	34.5642	RLEQEKDELQHALDEAEAALEAEESK	KVDDIQKEIDATTR	74	34	0.187	11290	32.7724	KVDDIQKEIDATTR	QIEEAEEVATQNLSK	33.6683	WBGene00002348	myo-1	R06C7.10	Concise description: none available Provisional description: none available Detailed description: none available
181316	WBGene00002050	F38B2.1	P90901	50	7.5809	38	18	0.355	11862	16.0175	THAITQETDTETMR	GNVSIHEASPDGK	43	19	0.314	11290	19.0434	THAITQETDTETMR	GNVSIHEASPDGK	17.5304	WBGene00002050	ifa-1	F38B2.1a	Concise description: IFA-1 encodes an essential intermediate filament protein that is coexpressed with the essential IF protein IFB-1; IFA-1 is required for survival past the L1 larva stage, and a normal intestine; IFA-1 forms heteropolymeric intermediate filaments in vitro with an equimolar mixture of IFB-1; IFA-1 is predicted to function as a structural component of the cytoskeleton, and is req…
179428	WBGene00003090	Y22F5A.4	O62415	32	7.541	7	2	0.114	11862	2.9506	GFTPFGSGAFDTTSVTSIR	SATTNVNFLNSIISR	7	3	0.164	11290	3.10009	GFTPFGSGAFDTTSVTSIR	SATTNVNFLNSIISR	3.02535	WBGene00003090	lys-1	Y22F5A.4	Concise description: lys-1 encodes a putative lysozyme, whose overexpression increases resistance to infection by Serratia marcescens; lys-1(RNAi) animals have normal resistance to S. marcescens, perhaps because of genetic redundancy with the LYS-1 paralogs LYS-2 to -8 and LYS-10; in uninfected animals, LYS-1 is expressed in the intestine and in IL1/IL2 neurons, along with a few unidentified head…
178113	WBGene00003920	M117.2	N1NV25	68	7.4808	14	7	0.298	11862	5.9012	KVTEQGQELSNEER	VKVEQELNDICQDVLK	16	7	0.298	11290	7.08592	KVTEQGQELSNEER	VKVEQELNDICQDVLK	6.49356	WBGene00003920	par-5	M117.2	Concise description: PAR-5 encodes one of two C. elegans 14-3-3 proteins; par-5 is essential for early embryonic development, particularly for early embryonic asymmetry; PAR-5 also functions in a Wnt/MAPK signaling pathway to regulate the nuclear level of the POP-1/TCF transcription factor; PAR-5 has been shown to physically interact with a number of proteins, including those involved in G protei…
177295	WBGene00006586	W03F8.1	O44572	33	7.3076	14	5	0.366	11862	5.9012	VVDKNEFALDEEDTEKKEK	AAEDLKQQQMLK	12	6	0.387	11290	5.31444	VVDKNEFALDEEDTEKKEK	IIPLPDLDNEDDLEAVYDEIRER	5.60782	WBGene00006586	tni-4	W03F8.1	Concise description: tni-4 encodes one of the four elegans troponin I proteins; tni-4 is required for the normal development of the pharynx during embryonic development; TNI-4 interacts only with the pharyngeal troponin C; tni-4 is expressed exclusively in the pharyngeal muscles. Provisional description: tni-4 encodes one of the four elegans troponin I proteins; tni-4 is required for the normal d…
181698	WBGene00003485	W10G6.3	O02365	53	7.2379	28	14	0.275	11862	11.8024	GFETELKELQAQAAR	QTGKDHGETEKEIR	28	14	0.317	11290	12.4004	GFETELKELQAQAAR	SYEAALNDKDAQIR	12.1014	WBGene00003485	mua-6	W10G6.3	Concise description: mua-6 encodes an essential intermediate filament protein (MUA-6/IFA-2) that is coexpressed with the essential IF protein IFB-1; MUA-6 is required for hypodermal integrity and for lasting attachment of muscles to the body wall; MUA-6 is also required for normal positioning of excretory canals and muscles; MUA-6 forms heteropolymeric intermediate filaments in vitro with an equi…
181404	WBGene00003514	T18D3.4	P12845	54	7.096	64	30	0.194	11862	26.9769	VKDLHDQLADEKDAR	LNKETADLLAQLEASK	65	33	0.189	11290	28.7865	VKDLHDQLADEKDAR	LNKETADLLAQLEASK	27.8817	WBGene00003514	myo-2	T18D3.4	Concise description: myo-2 encodes a muscle-type specific myosin heavy chain isoform; myo-2 is expressed in pharyngeal muscle. Provisional description: myo-2 encodes a muscle-type specific myosin heavy chain isoform; myo-2 is expressed in pharyngeal muscle. Detailed description: none available
178740	WBGene00004130	F54E2.3	Q5PY59	38	7.057	6	4	0.01	11862	2.52908	EKLEAVDAEPEKTAPK	GKDLEAGEKVK	9	6	0.015	11290	3.98583	EKLEAVDAEPEKTAPK	GKDLEAGEKVK	3.25746	WBGene00004130	ketn-1	F54E2.3a	Concise description: ketn-1 encodes an ortholog of kettin (in D. melanogaster, SALLIMUS), an invertebrate isoform or paralog of titin; ketn-1 is transcriptionally upregulated two-fold by hypoxia, requires both HIF-1 and VHL-1 for this induction, and contains three predicted HIF-1 binding sites in its predicted 5' regulatory region; ketn-1's induction by hypoxia correlates with upregulation of oth…
181238	WBGene00009621	F41E7.5	Q20277	41	7.0531	14	7	0.75	11862	5.9012	GGFGGGPGSNYGPGR	GGGGGFGGGPGQFGR	11	6	0.536	11290	4.87157	GGFGGGPGSNYGPGR	GGGGGFGGGPGQFGR	5.38638	WBGene00009621	fipr-21	F41E7.5	Concise description: none available Provisional description: none available Detailed description: none available
180044	WBGene00004452	C06B8.8	O17570	58	7.0086	10	4	0.443	11862	4.21514	TLVVADKDKAEK	LKQSLPPGIQVK	13	4	0.443	11290	5.75731	TLVVADKDKAEK	LKQSLPPGIQVK	4.98623	WBGene00004452	rpl-38	C06B8.8	Concise description: rpl-38 encodes a large ribosomal subunit L38 protein. Provisional description: rpl-38 encodes a large ribosomal subunit L38 protein. Detailed description: none available
180603	WBGene00004951	K10B3.10	G4S034	45	6.8492	32	17	0.103	11862	13.4885	STGEQIIDSGHFAADHIGDR	RIDTELASHEPQVSLVK	31	19	0.104	11290	13.729	STGEQIIDSGHFAADHIGDR	ITELKDQLVSSEHQQSPAIEKR	13.6088	WBGene00004951	spc-1	K10B3.10a	Concise description: spc-1 encodes the C. elegans alpha spectrin ortholog; during development, spc-1 activity is required for body morphogenesis, formation of body wall muscles, locomotion, and larval development. Provisional description: spc-1 encodes the C. elegans alpha spectrin ortholog; during development, spc-1 activity is required for body morphogenesis, formation of body wall muscles, loc…
181776	WBGene00003369	C36E6.3	P19625	38	6.7248	90	32	0.765	11862	37.9363	RGEPLDEDEVKAMYK	RGEPLDEDEVKAMYK								18.9682	WBGene00003369	mlc-1	C36E6.3	Concise description: mlc-1 encodes a muscle regulatory myosin light chain that is nearly identical to MLC-2 and functions redundantly with MLC-2 in the body-wall and in pharyngeal muscle to affect L1 larval viability, elongation, and pharyngeal and body-wall muscle development, and also affects locomotion and growth; expressed in the body-wall muscles, pharyngeal muscles, and vulval muscles. Prov…
172134	WBGene00016258	C30F8.2	Q95YD5	34	6.7097	8	3	0.115	11862	3.37211	TLEDKFFEHEVK	MGEFLFNIDHGYLEALTR	8	2	0.063	11290	3.54296	TLEDKFFEHEVK	FDTELSKDDR	3.45754	WBGene00016258	vha-16	C30F8.2	Concise description: vha-16 encodes an an ortholog of subunit d of the membrane-bound (V0) domain of vacuolar proton-translocating ATPase (V-ATPase); VHA-16 is predicted to mechanically anchor the V-ATPase cytosolic rotor (stalk) to the membrane, while also providing a hub for the V-ATPase transmembrane rotor; vha-16 is expressed in diverse tissues (e.g., excretory cell, pharynx, intestine, hypod…
173319	WBGene00002978	Y105E8B.1	K8FDX2	70	6.6103	75	21	0.586	11862	31.6136	AEAGENKIVELEEELRVVGNNLK	AEAGENKIVELEEELR	78	22	0.648	11290	34.5438	AEAGENKIVELEEELRVVGNNLK	AEAGENKIVELEEELR	33.0787	WBGene00002978	lev-11	Y105E8B.1a	Concise description: lev-11 encodes tropomyosin, an actin-binding contractile structural protein orthologous to human TROPOMYOSIN 1 (TPM1; OMIM:191010), which when mutated leads to familial hypertrophic cardiomyopathy; LEV-11 is required for embryonic development, normal body morphology, and locomotion; expressed as multiple tissue-specific isoforms generated by alternative mRNA splicing and prom…
180279	WBGene00012812	Y43F8B.1	Y43F8B.1	34	6.5611	8	4	0.111	11862	3.37211	YNPAEVDQQQQAAGQQQVIR	AQAAQQQAQAQAQAQQK	8	5	0.096	11290	3.54296	YNPAEVDQQQQAAGQQQVIR	AQQAQQAQAQAQTQAQKK	3.45754	WBGene00012812	Y43F8B.1	Y43F8B.1a	Concise description: none available Provisional description: none available Detailed description: none available
181775	WBGene00003370	C36E6.5	P19626	70	6.3564	94	32	0.765	11862	39.6223	RGEPLDEDEVKAMYK	RGEPLDEDEVKAMYK	83	27	0.629	11290	36.7582	RGEPLDEDEVKAMYK	RGEPLDEDEVKAMYK	38.1902	WBGene00003370	mlc-2	C36E6.5	Concise description: mlc-2 encodes, along with mlc-1 and mlc-4, one of three C. elegans regulatory myosin light chains; MLC-2 is predicted to function as a regulator of myosin ATPase activity, and genetic studies indicate that MLC-2 is nearly essential in hermaphrodites for normal pharyngeal muscle function, but redundant with MLC-1, with which it is nearly identical, for proper bodywall muscle d…
171692	WBGene00004429	Y48G8AL.8	Q9BL19	66	6.3508	18	5	0.371	11862	7.58725	NAESNAEYKGLDVDHLVIEHINVQR	GLDVDHLVIEHINVQR	16	5	0.371	11290	7.08592	NAESNAEYKGLDVDHLVIEHINVQR	GLDVDHLVIEHINVQR	7.33659	WBGene00004429	rpl-17	Y48G8AL.8a	Concise description: rpl-17 encodes a large ribosomal subunit L17 protein; by homology, RPL-17 is predicted to function in protein biosynthesis; in C. elegans, RPL-17 activity is required for embryonic and germline development, as well as normal postembryonic growth rates. Provisional description: rpl-17 encodes a large ribosomal subunit L17 protein; by homology, RPL-17 is predicted to function i…
179077	WBGene00006803	K11C4.3	G5EG85	31	6.2458	5	4	0.021	11862	2.10757	HRPDLVDYDNLQK	SPLTEQIQVR	9	5	0.029	11290	3.98583	HQAFQSELAANKER	SPLTEQIQVR	3.0467	WBGene00006803	unc-70	K11C4.3a	Concise description: unc-70 encodes two isoforms of a beta-spectrin ortholog required for normal body curvature and shape, normal movement, and correct localization of the alpha-spectrin SPC-1; the predominant UNC-70 isoform is expressed in all embryonic cells except the intestine, at the plasma membrane at sites of intercellular contact; UNC-70 becomes largely restricted to muscles and neurons f…
180613	WBGene00018237	F40F4.6	Q20219	43	6.0977	12	6	0.042	11862	5.05817	HVGEDEFGNTFQR	QNSDTVNQLIANLK	9	5	0.028	11290	3.98583	HVGEDEFGNTFQR	QNSDTVNQLIANLK	4.522	WBGene00018237	F40F4.6	F40F4.6	Concise description: none available Provisional description: none available Detailed description: none available
175519	WBGene00006537	C36E8.5	P52275	57	6.0077	59	19	0.362	11862	24.8693	GHYTEGAELVDNVLDVIRK	GHYTEGAELVDNVLDVIR	46	16	0.338	11290	20.372	GHYTEGAELVDNVLDVIRK	MAATFVGNSTAIQELFKR	22.6207	WBGene00006537	tbb-2	C36E8.5	Concise description: tbb-2 encodes a homolog of mammalian beta-tubulin (TUBB) that is expressed at high levels in the germline; TBB-2 is redundant for embryonic viability, due to its paralog TBB-1; however, unlike its paralog TBB-1 it is preferred for normal microtubule severing by the katanin complex MEI-1/MEI-2; TBB-2 is required together with TBB-1, TBA-1, and tba-2 to make spindle structures …
175030	WBGene00001883	ZK131.3	K7ZUH9	40	5.9649	10	5	0.199	11862	4.21514	RPGTVALR	RVTIMPK	9	6	0.279	11290	3.98583	EIAQDFKTDLR	RPGTVALR	4.10048	WBGene00001883	his-9	ZK131.3	Concise description: his-9 encodes an H3 histone; by homology, HIS-9 is predicted to function as a nucleosome component required for packaging of DNA into chromatin; his-9 is a replication-dependent histone locus that resides in the HIS3 cluster on chromosome II. Provisional description: his-9 encodes an H3 histone; by homology, HIS-9 is predicted to function as a nucleosome component required fo…
175716	WBGene00000229	C34E10.6	P46561	68	5.8854	72	24	0.416	11862	30.349	LILEVSQHLGDNVVR	TREGNDLYHEMIEGGVIDLK	71	25	0.431	11290	31.4438	GQPVADTGDPIKIPVGPETLGR	TREGNDLYHEMIEGGVIDLK	30.8964	WBGene00000229	atp-2	C34E10.6	Concise description: atp-2 encodes the beta subunit of the soluble, catalytic F1 portion of ATP synthase (mitochondrial respiratory chain [MRC] complex V); atp-2 activity is required for embryonic and larval development past the L3 stage, as well as for normal mobility, pharyngeal pumping, defecation, growth rate, and larval lifespan; in males, atp-2 activity is also required cell autonomously in…
176516	WBGene00000475	Y39A1C.3	G5EDV3	43	5.7741	8	2	0.187	11862	3.37211	VAEVTEKLDNLAVDTTNEANDAKQPAR	LQPDAPSGEKGDGDAAAATTDAAPAAEK	8	5	0.306	11290	3.54296	LQPDAPSGEKGDGDAAAATTDAAPAAEK	KLEEDLASKK	3.45754	WBGene00000475	cey-4	Y39A1C.3	Concise description: cey-4 encodes a Y box-containing protein with no known function in vivo; CEY-4 associates with CGH-1 and CEY-2/3 in cytoplasmic particles of the gonad and early embryo. Provisional description: cey-4 encodes a Y box-containing protein with no known function in vivo; CEY-4 associates with CGH-1 and CEY-2/3 in cytoplasmic particles of the gonad and early embryo. Detailed descri…
180914	WBGene00003495	T22E5.5	Q27371	52	5.6889	12	5	0.168	11862	5.05817	NLEPPKYVEQVKVEGAR	IVKLEAEKYDLEK	16	7	0.242	11290	7.08592	NLEPPKYVEQVKVEGAR	VLEKEQIEQELR	6.07205	WBGene00003495	mup-2	T22E5.5	Concise description: mup-2 encodes the muscle contractile protein troponin T ( TnT ) homologous to vertebrate and invertebrate TnT and contains an invertebrate- specific COOH -terminal tail; mup-2 affects embryonic body wall muscle cell contraction, sarcomere organization, cell positioning, regulated muscle contraction in larval and adult body wall muscle, epidermal morphogenesis, and is required…
181119	WBGene00006587	F53A9.10	Q7Z071	34	5.6492	4	3	0.096	11862	1.68606	AEGLTKEQQEDAKR	GLDPEEAASSVHPPK	7	5	0.178	11290	3.10009	NFTVSNKGDQAANFGNLAQGAK	GLDPEEAASSVHPPK	2.39308	WBGene00006587	tnt-2	F53A9.10a	Concise description: none available Provisional description: none available Detailed description: none available
180535	WBGene00004423	F07D10.1	Q19162	35	5.5965	10	4	0.235	11862	4.21514	VLEQLTGQTPVFSK	GPKAEEILEK	11	4	0.235	11290	4.87157	VLEQLTGQTPVFSK	GPKAEEILEK	4.54336	WBGene00004423	rpl-11.2	F07D10.1	Concise description: rpl-11.2 encodes a large ribosomal subunit L11 protein; by homology, RPL-11.2 is predicted to function in protein biosynthesis. Provisional description: This gene encodes a protein predicted by Eisenberg and coworkers, with 52 percentage accuracy, to be mitochondrial. Detailed description: none available
175951	WBGene00000998	K07E12.1	Q8MQ08	23	5.4447	2	2	0.004	11862	0.843028	NEDGEFVKPK	IGPDGQVLPTDNSGNYIYPVIGPDGQVLPTDASGK	2	2	0.002	11290	0.88574	NEDGEFVKPK	VNTDGPDQNTLR	0.864384	WBGene00000998	dig-1	K07E12.1a	Concise description: dig-1 encodes a giant member of the immunoglobulin superfamily; dig-1 functions cell non-autonomously to mediate axon fasciculation and maintenance of cell body position within ganglia; dig-1 is also required for proper placement of the gonad; dig-1 is initially expressed in the developing embryonic gut and then expressed by a number of different muscle cells, including the b…
172743	WBGene00001167	F25H5.4	P29691	72	5.4221	67	30	0.311	11862	28.2414	GHVFEESQVTGTPMFVVK	DLEFVKGENQFETVEVDGKK	69	31	0.288	11290	30.558	LANDEKDLEGKPLMK	LANDEKDLEGKPLMK	29.3997	WBGene00001167	eef-2	F25H5.4a	Concise description: eef-2 encodes a homolog of translation elongation factor 2 (EF-2), a GTP-binding protein essential for the elongation phase of protein synthesis; eef-2 is required for embryogenesis and vulval morphogenesis, and is expressed during all stages of development, including the dauer larval stage. Provisional description: eef-2 encodes a homolog of translation elongation factor 2 (…
266969	WBGene00006436	W06H8.8	G4SLD6	51	5.332	26	9	0.006	11862	10.9594	LKKENDDKLKQEADAK	EKDDKLKQEADAK	27	9	0.006	11290	11.9575	LKKENDDKLKQEADAK	EKDDKLKQEADAK	11.4584	WBGene00006436	ttn-1	W06H8.8a	Concise description: ttn-1, through multiple splicing, encodes at least six protein isoforms that are orthologs of titin (OMIM:188840, mutated in cardiomyopathy or tibial muscular dystrophy), with the three largest isoforms being 2.2 MDa, 1.2 MDa and 301 kDa; TTN-1 isoforms are expressed in body wall and vulval muscle, localized to the centers of I-bands, with the two largest isoforms expressed i…
181108	WBGene00015391	C03G5.1	Q09508	62	5.288	49	16	0.294	11862	20.6542	AAGECGAHSVHGANR	VVDHAYDAVVVGAGGAGLR	47	17	0.289	11290	20.8149	AAGECGAHSVHGANR	VVDHAYDAVVVGAGGAGLR	20.7345	WBGene00015391	sdha-1	C03G5.1	Concise description: sdha-1 is orthologous to the human gene SUCCINATE DEHYDROGENASE COMPLEX, SUBUNIT A, FLAVOPROTEIN (SDHA; OMIM:600857), which when mutated leads to complex II mitochondrial respiratory chain deficiency presenting as Leigh syndrome. Provisional description: This gene encodes a protein predicted by Eisenberg and coworkers, with 52 percentage accuracy, to be mitochondrial. Protein…
176434	WBGene00011867	T20G5.1	P34574	49	5.1136	28	12	0.077	11862	11.8024	IQEGATDAATHNAMAK	GKFDIDELVEEVEKR	19	13	0.101	11290	8.41453	IQEGATDAATHNAMAK	GKFDIDELVEEVEKR	10.1085	WBGene00011867	chc-1	T20G5.1	Concise description: chc-1 encodes the C. elegans clathrin heavy chain ortholog; loss of chc-1 activity via RNAi results in defects in receptor-mediated yolk endocytosis and thus, embryonic lethality. Provisional description: chc-1 encodes the C. elegans clathrin heavy chain ortholog; loss of chc-1 activity via RNAi results in defects in receptor-mediated yolk endocytosis and thus, embryonic leth…
171990	WBGene00006820	C09D1.1	O01761	23	5.0023	2	2	0.004	11862	0.843028	KIEHTAHTEIR	AVATNSEGSDETKAK	1	1	0.002	11290	0.44287	KIEHTAHTEIR	NA	0.642949	WBGene00006820	unc-89	C09D1.1a	Concise description: unc-89 encodes several protein isoforms variably characterized by the presence or absence of SH3, DH, PH, immunoglobulin and myosin light chain kinase (MLCK)-like protein kinase domains; during development, unc-89 is required for proper organization of A bands in striated muscle and thus for fully normal locomotion, pharyngeal muscle contractions, and body size; unc-89 is exp…
172401	WBGene00016493	C37A2.7	O01504	63	4.9365	41	11	0.738	11862	17.2821	VLEAGGLDCDMENANSVVDALK	LSSVPSGGSAPAAAAPSGGAAPK	39	12	0.738	11290	17.2719	SSVPSGGSAPAAAAPSGGAAPK	LSSVPSGGSAPAAAAPSGGAAPK	17.277	WBGene00016493	C37A2.7	C37A2.7	Concise description: none available Provisional description: none available Detailed description: none available
179095	WBGene00003786	VC5.3	G5EF32	35	4.8183	7	4	0.029	11862	2.9506	GVVDRQEGEVK	TLTEEFKGK	7	4	0.029	11290	3.10009	GVVDRQEGEVK	TLTEEFKGK	3.02535	WBGene00003786	npa-1	VC5.3a	Concise description: npa-1 encodes a large polyprotein precursor that is posttranslationally cleaved to multiple units of ~14.5kDa, each of which is a strong binding protein for fatty acids and retinol (Vitamin A); the lipid binding sites of NPA-1-derived peptides are unusually apolar; NPA-1-derived peptides probably are carrier proteins that enable distribution of these lipids within nematodes; …
180880	WBGene00002007	C15H9.6	V6CJ24	69	4.7983	52	20	0.309	11862	21.9187	VLEDSDLKKDDVHEIVLVGGSTR	IINEPTAAAIAYGLDKK	46	17	0.271	11290	20.372	VLEDSDLKKDDVHEIVLVGGSTR	IINEPTAAAIAYGLDKK	21.1454	WBGene00002007	hsp-3	C15H9.6	Concise description: hsp-3 encodes one of two C. elegans heat shock response 70 (hsp70) proteins homologous to mammalian grp78/BiP (glucose regulated protein 78/immunoglobulin heavy chain-binding protein, OMIM:138120); HSP-3 likely functions as a molecular chaperone, and is expressed constitutively (expression is not heat inducible) throughout development with greatest abundance during the L1 lar…
172920	WBGene00003902	Y106G6H.2	Q7K797	60	4.73	11	5	0.116	11862	4.63665	GPPQQYNQVAQGGVR	FGDHYNKETLEK	9	4	0.116	11290	3.98583	FGDHYNKETLEK	TQNPGVQQQNVPRPPQQQQQQRPAPTGPK	4.31124	WBGene00003902	pab-1	Y106G6H.2a	Concise description: pab-1 encodes a polyadenylate-binding protein (i.e., poly(A)-binding protein, or PAB); pab-1 is essential for germline proliferation, regulation of adult lifespan, and normal body size; PAB-1 forms a complex with ATX-2, the C. elegans ataxin 2 ortholog, which is also required for germline development; PAB-1 has been successfully used as an epitope-tagged transgenic reagent fo…
173134	WBGene00010419	H28O16.1	H28O16.1	70	4.7122	46	20	0.37	11862	19.3896	GYLDKVDPSAITKFEKEFLAHLR	VVDALGNPIDGKGPIANAR	51	22	0.327	11290	22.5864	VVDALGNPIDGKGPIANAR	ILGTETGINLEETGK	20.988	WBGene00010419	H28O16.1	H28O16.1a	Concise description: none available Provisional description: none available Detailed description: none available
173076	WBGene00011059	R06C1.4	R06C1.4	28	4.7061	3	2	0.31	11862	1.26454	GFAFVEFSEEAGAQR	IVYDRETGRPR	3	2	0.31	11290	1.32861	GFAFVEFSEEAGAQR	IVYDRETGRPR	1.29658	WBGene00011059	R06C1.4	R06C1.4	Concise description: none available Provisional description: none available Detailed description: none available
176975	WBGene00004497	Y41D4B.5	Q95Y04	63	4.7026	13	7	0.738	11862	5.47968	GPVREGDILTLLESER	TGSQGQCTQVR	6	4	0.615	11290	2.65722	TGSQGQCTQVR	VEFINDQNNR	4.06845	WBGene00004497	rps-28	Y41D4B.5	Concise description: rps-28 encodes a small ribosomal subunit S28 protein. Provisional description: rps-28 encodes a small ribosomal subunit S28 protein. Detailed description: none available
173360	WBGene00001488	ZK270.2	G5EEP9	26	4.548	3	3	0.009	11862	1.26454	GIVETHVEHR	EKVDVPAEPEKK	2	2	0.005	11290	0.88574	EKVDVPAEPEKK	GIVETHVEHR	1.07514	WBGene00001488	frm-1	ZK270.2a	Concise description: none available Provisional description: none available Detailed description: none available
181545	WBGene00001898	M163.3	P10771	40	4.5222	8	4	0.192	11862	3.37211	MSDSAVVAAAVEPK	ALVQAAGSGANGR	9	6	0.236	11290	3.98583	MSDSAVVAAAVEPK	ALVQAAGSGANGR	3.67897	WBGene00001898	his-24	M163.3	Concise description: his-24 encodes one of eight C. elegans H1 linker histones; HIS-24, along with the histone deacetylase SIR-2.1 and the Enhancer of zeste E(Z) ortholog MES-2, plays a key role in heterochromatin regulation and thus, in regulation of fertility and embryonic development; specifically, HIS-24 and SIR-2.1 are essential for maintenance of the histone H3K27me3 mark at subtelomeric re…
178709	WBGene00017499	F15E11.13	G5EET8	31	4.5023	2	1	0.073	11862	0.843028	SIDNQTGSHFK	NA	6	3	0.159	11290	2.65722	TEVDNKGHQIGKK	TEVDNKGHQIGK	1.75012	WBGene00017499	F15E11.13	F15E11.13	Concise description: F15E11.13, along with Y19D10B.7, encodes a protein (CE25224) of unknown function; the Y19D10B.7/F15E11.13 proteins are present at significantly higher levels in daf-2 mutant vs. wild-type adults during a temperature shift from 15 to 25 degrees C; F15E11.13 (RNAi) animals have no obvious mutant phenotype (i. e., they have no obvious defect in fertility or germline maintenance)…
172943	WBGene00004408	F25H2.10	Q93572	70	4.4728	54	18	0.413	11862	22.7618	LLPHIVENVGFVFTKEDLGEIR	AAAAPAAAAAPAAAAPAAK	34	15	0.417	11290	15.0576	LLPHIVENVGFVFTKEDLGEIR	FAAAAPAAAAAPAAAAPAAK	18.9097	WBGene00004408	rla-0	F25H2.10	Concise description: rpa-0 encodes an acidic ribosomal subunit protein P0. Provisional description: rpa-0 encodes an acidic ribosomal subunit protein P0. Detailed description: none available
178710	WBGene00017490	F15E11.1	G5EBF3	35	4.4074	4	3	0.175	11862	1.68606	QIETNLDDKNGVVDGK	QIETNLDDKNGVVDGK	6	4	0.253	11290	2.65722	VEDHAQTTVIK	QIETNLDDKNGVVDGK	2.17164	WBGene00017490	F15E11.1	F15E11.1	Concise description: F15E11.1, along with F15E11.14, encodes a 17.4 kDa protein (CE16999) with unknown function that is seven-fold more abundant in glp-1 mutant hermaphrodites (which lack a germline) than in normal hermaphrodites; in addition, the protein products of F15E11.1/F15E11.14 are more abundant in daf-2 mutant vs. wild-type adults during a temperature shift from 15 to 25 degrees C; F15E1…
174803	WBGene00001679	F13D12.7	D1MN68	30	4.3933	4	2	0.074	11862	1.68606	MSELDQLRQEAEQLK	AGVLAGHDNR	3	1	0.044	11290	1.32861	MSELDQLRQEAEQLK	NA	1.50734	WBGene00001679	gpb-1	F13D12.7a	Concise description: gpb-1 encodes a heterotrimeric G protein beta subunit that is required during embryonic development for the proper orientation of the mitotic spindle during early cell divisions and thus affects the orientation of early cell division axes, and is also required for larval viability, negatively regulates locomotion and egg-laying, and may affect germline development and osmotic…
171766	WBGene00004409	Y37E3.7	P91913	70	4.3835	41	14	0.667	11862	17.2821	NLITSVSSGAGSGPAPAAAAAAPAAGGAAPAAETK	AALILQDDEVAITGEK	43	15	0.523	11290	19.0434	NLITSVSSGAGSGPAPAAAAAAPAAGGAAPAAETK	KNLITSVSSGAGSGPAPAAAAAAPAAGGAAPAAETK	18.1627	WBGene00004409	rla-1	Y37E3.7	Concise description: rla-1 encodes an acidic ribosomal subunit protein P1. Provisional description: rla-1 encodes an acidic ribosomal subunit protein P1. Detailed description: none available
177392	WBGene00022235	Y73B6BL.6	Q8MXR6	39	4.3302	9	4	0.263	11862	3.79363	RNFAFIVFEEEESADKASSQTK	IFVGGISPEVNNEDLSSHFTQYGEVAQAQVK	10	5	0.269	11290	4.4287	RNFAFIVFEEEESADKASSQTK	VFVGGLPSDYSEQDLR	4.11116	WBGene00022235	sqd-1	Y73B6BL.6a	Concise description: none available Provisional description: none available Detailed description: none available
176718	WBGene00006728	ZK1010.1	P49632	72	4.3097	44	11	0.484	11862	18.5466	TLSDYNIQKESTLHLVLR	TITLEVEASDTIENVK	42	12	0.484	11290	18.6005	TLSDYNIQKESTLHLVLR	TITLEVEASDTIENVK	18.5736	WBGene00006728	ubq-2	ZK1010.1	Concise description: ubq-2 encodes a bifunctional protein that contains two domains; an N-terminal ubiquitin peptide, and a C-terminal large ribosomal subunit protein L40 peptide. Provisional description: ubq-2 encodes a bifunctional protein that contains two domains; an N-terminal ubiquitin peptide, and a C-terminal large ribosomal subunit protein L40 peptide. Detailed description: none available
172074	WBGene00004415	B0041.4	O02056	70	4.2714	44	16	0.362	11862	18.5466	GHVIDQVAEVPLVVSDKVESFRK	GHVIDQVAEVPLVVSDKVESFR	36	13	0.319	11290	15.9433	GHVIDQVAEVPLVVSDKVESFRK	MAARPLVTVYDEKYEATQSQIR	17.2449	WBGene00004415	rpl-4	B0041.4	Concise description: rpl-4 encodes a large ribosomal subunit L4 protein. Provisional description: rpl-4 encodes a large ribosomal subunit L4 protein. Detailed description: none available
176006	WBGene00004483	F37C12.9	P48150	72	4.2418	16	5	0.382	11862	6.74423	AKEEQAVVSLGPQAK	ASFNDTFVHITDISGR	18	6	0.401	11290	7.97166	AKEEQAVVSLGPQAK	ASFNDTFVHITDISGR	7.35794	WBGene00004483	rps-14	F37C12.9	Concise description: rps-14 encodes a small ribosomal subunit S14 protein; by homology, RPS-14 is predicted to function in protein biosynthesis; in C. elegans, RPS-14 activity is required for embryonic and germline development, as well as the overall health of the animal; RPS-14 co-immuoprecipitates with ALG-1, a C. elegans Argonaut ortholog. Provisional description: rps-14 encodes a small riboso…
177018	WBGene00006911	R10E11.2	P34546	39	4.241	4	2	0.13	11862	1.68606	MSYDLETAER	TVLGAAYGTAK	4	2	0.13	11290	1.77148	MSYDLETAER	TVLGAAYGTAK	1.72877	WBGene00006911	vha-2	R10E11.2	Concise description: vha-2 and vha-3 encode an ortholog of subunit c of the membrane-bound (V0) domain of vacuolar proton-translocating ATPase (V-ATPase); the protein encoded by vha-2 and vha-3 (VHA-2/3) is identical; VHA-2/3 is a predicted V-ATPase transmembrane rotor component, whose polypeptide sequence is identical to that of VHA-3; VHA-1 and VHA-2/3 comprise a closely related family of subun…
176011	WBGene00004490	F37C12.11	P49197	60	4.1023	12	8	0.625	11862	5.05817	DHASVQIDFVDVDPETGR	MQNDAGQTVELYVPRK	17	8	0.625	11290	7.52879	DHASVQIDFVDVDPETGR	MQNDAGQTVELYVPRK	6.29348	WBGene00004490	rps-21	F37C12.11	Concise description: rps-21 encodes a small ribosomal subunit S21 protein; by homology, RPS-21 is predicted to function in protein biosynthesis; in C. elegans, RPS-21 activity is required for embryonic and germline development, as well as the overall health of the animal. Provisional description: rps-21 encodes a small ribosomal subunit S21 protein; by homology, RPS-21 is predicted to function in…
174379	WBGene00004440	F28C6.7	Q19869	64	4.0916	24	8	0.55	11862	10.1163	AIPIRTDDEVVVMR	MKVNPFVSSDSGK	24	8	0.495	11290	10.6289	MKVNPFVSSDSGK	AIPIRTDDEVVVMR	10.3726	WBGene00004440	rpl-26	F28C6.7a	Concise description: rpl-26 encodes a large ribosomal subunit L26 protein; by homology, RPL-26 is predicted to function in protein biosynthesis; in C. elegans, RPL-26 activity is required for embryonic and germline development and normal rates of postembryonic growth. Provisional description: rpl-26 encodes a large ribosomal subunit L26 protein; by homology, RPL-26 is predicted to function in pro…
178130	WBGene00014095	ZK829.4	Q23621	70	4.0859	36	18	0.341	11862	15.1745	IAGASEKDIVHSGLEYTMQR	SAATLDAHSQVLDEQKPMEEQVNPSFYK	37	18	0.313	11290	16.3862	IAGASEKDIVHSGLEYTMQR	SAATLDAHSQVLDEQKPMEEQVNPSFYK	15.7804	WBGene00014095	gdh-1	ZK829.4	Concise description: gdh-1 encodes a glutamate dehydrogenase, required in mass RNAi assays for normal fertility and rapid growth, that is expressed in larval and adult pharynx, intestine, and rectal gland cells; GDH-1 is orthologous to human GLUD1 (OMIM:138130, mutated in hyperinsulinemic hypoglycemia and hyperammonemia) and GLUD2 (OMIM:300144). Provisional description: gdh-1 encodes a glutamate …
259727	WBGene00012018	T25C12.3	T25C12.3	40	4.0524	5	4	0.025	11862	2.10757	SSPEDYLQVGQISQK	HLLVYVTQTNPTDADPSELLR	4	3	0.022	11290	1.77148	SSPEDYLQVGQISQK	HLLVYVTQTNPTDADPSELLR	1.93952	WBGene00012018	T25C12.3	T25C12.3	Concise description: none available Provisional description: none available Detailed description: none available
174367	WBGene00002065	F54C9.1	Q20751	59	3.968	26	4	0.335	11862	10.9594	MSDDHHDDEHFHTGDSGAAATFPK	KLEDICPSTHNMDVPVVK	23	3	0.261	11290	10.186	MSDDHHDDEHFHTGDSGAAATFPK	KLEDICPSTHNMDVPVVK	10.5727	WBGene00002065	iff-2	F54C9.1	Concise description: none available Provisional description: none available Detailed description: none available
175584	WBGene00004470	F56F3.5	P48154	69	3.9408	33	11	0.346	11862	13.91	LHDLHGDSITVGADGEKVDRPDDYEPPVQQEV	VFEVSLGDLNNSEADFRK	33	11	0.342	11290	14.6147	LHDLHGDSITVGADGEKVDRPDDYEPPVQQEV	VFEVSLGDLNNSEADFRK	14.2623	WBGene00004470	rps-1	F56F3.5	Concise description: rps-1 encodes a small ribosomal subunit S3A protein. Provisional description: rps-1 encodes a small ribosomal subunit S3A protein. Detailed description: none available
177952	WBGene00011182	R09H10.5	R09H10.5	38	3.9179	5	3	0.028	11862	2.10757	FTNDQGDDFGSGTPR	SQFSAYLGFSPDPSFDR	4	3	0.026	11290	1.77148	FTNDQGDDFGSGTPR	TATNSASNLDAVR	1.93952	WBGene00011182	R09H10.5	R09H10.5	Concise description: none available Provisional description: none available Detailed description: none available
172061	WBGene00004479	D1007.6	O01869	65	3.906	28	10	0.577	11862	11.8024	THPNIEGVSNLEVIK	LIYEYLFNEGVTVAK	22	10	0.557	11290	9.74314	THPNIEGVSNLEVIK	EYLALPAEIVPATIK	10.7728	WBGene00004479	rps-10	D1007.6	Concise description: rps-10 encodes a small (40S) ribosomal subunit S10 protein; loss of rps-10 activity in adult animals extends lifespan. Provisional description: rps-10 encodes a small (40S) ribosomal subunit S10 protein; loss of rps-10 activity in adult animals extends lifespan. Detailed description: none available
176858	WBGene00004493	T07A9.11	Q1XFY9	62	3.8917	21	8	0.351	11862	8.8518	SKGFALVYDTIDFAK	KQMVVEVIHPGRPTVPK	16	7	0.351	11290	7.08592	KQMVVEVIHPGRPTVPK	QMVVEVIHPGRPTVPK	7.96886	WBGene00004493	rps-24	T07A9.11	Concise description: rps-24 encodes a small ribosomal subunit S24 protein; by homology, RPS-24 is predicted to function in protein biosynthesis; in C. elegans, RPS-24 activity is required for germline development and the overall health of the animal. Provisional description: rps-24 encodes a small ribosomal subunit S24 protein; by homology, RPS-24 is predicted to function in protein biosynthesis;…
176283	WBGene00001385	F02A9.2	G1K0V6	53	3.8473	14	8	0.445	11862	5.9012	GYKDFKSEDDFLNALKEK	THIEAYKGLSQDAK	16	8	0.478	11290	7.08592	GYKDFKSEDDFLNALKEK	THIEAYKGLSQDAK	6.49356	WBGene00001385	far-1	F02A9.2a	Concise description: far-1 encodes a fatty acid/retinol binding protein; expressed throughout development with highest expression levels in L3 stage larvae and in adult males. Provisional description: far-1 encodes a fatty acid/retinol binding protein; expressed throughout development with highest expression levels in L3 stage larvae and in adult males. Detailed description: none available
174690	WBGene00000472	F33A8.3	O62213	44	3.8121	11	3	0.255	11862	4.63665	MAEKNDVAEQPADKPVK	GLEAASVTGPDGGPVQGSK	9	2	0.173	11290	3.98583	GLEAASVTGPDGGPVQGSK	MAEKNDVAEQPADKPVK	4.31124	WBGene00000472	cey-1	F33A8.3	Concise description: cey-1 encodes a protein with a cold-shock/Y-box domain that is expressed in early embryonic blastomeres (at the 15-cell stage, i.e., pre-gastrulation), but is normally repressed in early germline blastomeres by PIE-1. Provisional description: cey-1 encodes a protein with a cold-shock/Y-box domain that is expressed in early embryonic blastomeres (at the 15-cell stage, i.e., pr…
172805	WBGene00004488	T05F1.3	O18650	64	3.8099	25	6	0.185	11862	10.5379	ATSIKDVDQHEATK	TSIKDVDQHEATK	28	8	0.342	11290	12.4004	ATSIKDVDQHEATK	TRATSIKDVDQHEATK	11.4692	WBGene00004488	rps-19	T05F1.3	Concise description: rps-19 encodes a small ribosomal subunit S19 protein, orthologous to human RPS19 (OMIM:603474, mutated in Diamond-Blackfan anemia). Provisional description: rps-19 encodes a small ribosomal subunit S19 protein, orthologous to human RPS19 (OMIM:603474, mutated in Diamond-Blackfan anemia). Detailed description: none available
179971	WBGene00000915	C47E8.5	Q18688	65	3.7989	21	11	0.187	11862	8.8518	IVMHIKEDQIDFLEER	YSTSAGDEPTSLKEYVSR	22	12	0.201	11290	9.74314	YSTSAGDEPTSLKEYVSR	IVMHIKEDQIDFLEER	9.29747	WBGene00000915	daf-21	C47E8.5	Concise description: daf-21 encodes a member of the Hsp90 family of molecular chaperones; DAF-21 activity is required for larval development, negative regulation of dauer larva formation, and a number of specific chemosensory behaviors, such as the response to chemicals and odorants detected by the ASE and AWC sensory neurons; a daf-21 sensory defect can be rescued by a cyclic GMP analogue, sugge…
171767	WBGene00021350	Y37E3.8	Y37E3.8	62	3.7904	5	2	0.295	11862	2.10757	GLLPETPLIVK	DKATGGKSPVIDCTK	8	3	0.241	11290	3.54296	GLLPETPLIVK	DKYHPGYFGK	2.82526	WBGene00021350	Y37E3.8	Y37E3.8a	Concise description: none available Provisional description: none available Detailed description: none available
172034	WBGene00000140	ZK973.6	Q9N4M4	51	3.7837	18	12	0.023	11862	7.58725	SAAHDQIVALEKEAEDVTAK	ISELLDPLESAYADVR	11	6	0.011	11290	4.87157	AVAPSSLISHDDLVVGLPEK	LAESSDKIDPQVAK	6.22941	WBGene00000140	anc-1	ZK973.6	Concise description: anc-1 encodes a protein, orthologous to Drosophila MSP 300 and mammalian SYNE1 and SYNE2 proteins; ANC-1 has coiled regions, a nuclear envelope localization domain (the KASH domain) and an actin-binding domain; ANC-1 affects the positioning of nuclei and mitochondria within the cytoskeleton; ANC-1 is expressed in the cytoplasm, but is localized to the nuclear periphery in an …
171602	WBGene00004418	F53G12.10	O01802	67	3.7756	26	11	0.344	11862	10.9594	VDGNRVPITDNTIVEQSLGK	KTNHFVEGGDFGNREDQINNLLR	31	9	0.344	11290	13.729	VDGNRVPITDNTIVEQSLGK	KTNHFVEGGDFGNREDQINNLLR	12.3442	WBGene00004418	rpl-7	F53G12.10	Concise description: rpl-7 encodes a large ribosomal subunit L7 protein required in mass RNAi assays for embryonic viability and normally rapid growth. Provisional description: rpl-7 encodes a large ribosomal subunit L7 protein required in mass RNAi assays for embryonic viability and normally rapid growth. Detailed description: none available
180343	WBGene00004413	B0250.1	Q9XVF7	70	3.7649	31	10	0.404	11862	13.0669	ASGNYATVIAHNPDTKK	ASGNYATVIAHNPDTK	31	9	0.419	11290	13.729	TTVVAAEGMHTGQFIHCGAK	TTVVAAEGMHTGQFIHCGAK	13.3979	WBGene00004413	rpl-2	B0250.1	Concise description: rpl-2 encodes a large ribosomal subunit L8 protein. Provisional description: rpl-2 encodes a large ribosomal subunit L8 protein. Detailed description: none available
178620	WBGene00004266	C39F7.4	I7FW32	40	3.76	6	3	0.122	11862	2.52908	MGPVQGAGGAPGVR	ITGSQPVQDKK	5	3	0.122	11290	2.21435	MGPVQGAGGAPGVR	MGPVQGAGGAPGVR	2.37172	WBGene00004266	rab-1	C39F7.4	Concise description: rab-1 encodes an ortholog of the small Ras-like GTPase Rab1; by homology, RAB-1 is predicted to play a role in intracellular vesicle trafficking, and consistent with this broad role, large-scale RNAi screens indicate that rab-1 activity is required for fertility, movement, and survival; in yeast two-hybrid assays, RAB-1 interacts with TIR-1, a C. elegans SARM ortholog that is…
175338	WBGene00004491	F53A3.3	A8WIR1	47	3.676	15	7	0.246	11862	6.32271	VRMNVLADALNAINNAEKR	MNVLADALNAINNAEKR	5	3	0.2	11290	2.21435	ADALNAINNAEKR	TTSAGIMDHEEAR	4.26853	WBGene00004491	rps-22	F53A3.3a	Concise description: rps-22 encodes a small ribosomal subunit S15a protein. Provisional description: rps-22 encodes a small ribosomal subunit S15a protein. Detailed description: none available
178020	WBGene00008505	F01G4.6	F01G4.6	63	3.6751	27	14	0.362	11862	11.3809	TVEALYQYVVPKPR	LNQDSQATAGGILKK	21	10	0.241	11290	9.30027	LNQDSQATAGGILKK	TVEALYQYVVPKPR	10.3406	WBGene00008505	F01G4.6	F01G4.6a	Concise description: none available Provisional description: none available Detailed description: none available
174695	WBGene00004454	C09H10.2	P48166	49	3.6161	9	5	0.276	11862	3.79363	CKHFELGGQKK	SGFGGQTKPIFR	11	7	0.276	11290	4.87157	CKHFELGGQKK	SGFGGQTKPIFR	4.3326	WBGene00004454	rpl-41	C09H10.2	Concise description: rpl-41 encodes a large ribosomal subunit L41 protein; by homology, RPL-41 is predicted to function in protein biosynthesis. Provisional description: rpl-41 encodes a large ribosomal subunit L41 protein; by homology, RPL-41 is predicted to function in protein biosynthesis. Detailed description: none available
175398	WBGene00007000	Y71H2AM.23	G5ECM6	53	3.6093	11	5	0.161	11862	4.63665	DKPHLNVGTIGHVDHGK	KYEDIDNAPEEK	13	5	0.161	11290	5.75731	KYEDIDNAPEEK	DKPHLNVGTIGHVDHGK	5.19698	WBGene00007000	tufm-1	Y71H2AM.23	Concise description: none available Provisional description: none available Detailed description: none available
175316	WBGene00002025	Y22D7AL.5	G8JYF5	61	3.597	22	10	0.206	11862	9.27331	IGGGSEVEVGEKKDR	AANEDQQIGVNIVKK	21	10	0.162	11290	9.30027	AANEDQQIGVNIVKK	IGGGSEVEVGEKKDR	9.28679	WBGene00002025	hsp-60	Y22D7AL.5a	Concise description: hsp-60 encodes a nuclear-encoded mitochondrion-specific chaperone that is a member of the GroE/Hsp10/60 superfamily of molecular chaperones; hsp-60 is involved in the mitochondrial unfolded protein response, as hsp-60 expression, normally broadly detected during development, is greatly increased in response to treatments that disrupt mitochondrial protein handling; loss of hs…
171853	WBGene00004412	Y71F9AL.13	Q95Y46	62	3.5349	24	9	0.403	11862	10.1163	VCVFGDQHHLDEAAAGDIPSMSADDLKK	VCVFGDQHHLDEAAAGDIPSMSADDLKK	19	8	0.403	11290	8.41453	VCVFGDQHHLDEAAAGDIPSMSADDLKK	VCVFGDQHHLDEAAAGDIPSMSADDLKK	9.26542	WBGene00004412	rpl-1	Y71F9AL.13a	Concise description: rpl-1 encodes a large ribosomal subunit L10a protein; by homology, RPL-1 is predicted to function in protein biosynthesis; in C. elegans, RPL-1 activity is essential for embryonic development. Provisional description: rpl-1 encodes a large ribosomal subunit L10a protein; by homology, RPL-1 is predicted to function in protein biosynthesis; in C. elegans, RPL-1 activity is esse…
181617	WBGene00010357	H03A11.2	H03A11.2	40	3.4927	3	2	0.021	11862	1.26454	TQNQEDFTHISGER	ILQGDGQQFEAR	3	2	0.021	11290	1.32861	TQNQEDFTHISGER	ILQGDGQQFEAR	1.29658	WBGene00010357	H03A11.2	H03A11.2	Concise description: none available Provisional description: none available Detailed description: none available
175171	WBGene00021043	W05G11.6	Q8ITY0	52	3.4897	10	5	0.1	11862	4.21514	SETTAAAEFTGK	VAGGEEEIAIETAIGYVPK	7	4	0.065	11290	3.10009	SETTAAAEFTGK	VLEALGDNDFVR	3.65761	WBGene00021043	pck-1	W05G11.6a	Concise description: pck-1 is one of three C. elegans genes that encode proteins with similarity to phosphoenolpyruvate carboxykinase (PEPCK); by similarity, the products of W05G11.6 are predicted to function in gluconeogenesis. Provisional description: pck-1 is one of three C. elegans genes that encode proteins with similarity to phosphoenolpyruvate carboxykinase (PEPCK); by similarity, the prod…
177503	WBGene00004477	F42C5.8	V6CM07	70	3.4785	28	15	0.361	11862	11.8024	IVDTMYNATNNELVR	TAAVDALLIEQFNTGR	25	15	0.418	11290	11.0717	IVDTMYNATNNELVR	TAAVDALLIEQFNTGR	11.437	WBGene00004477	rps-8	F42C5.8	Concise description: rps-8 encodes a small ribosomal subunit S8 protein; by homology, RPS-8 is predicted to function in protein biosynthesis; in C. elegans, RPS-8 activity is required for germline development and the overall health of the animal. Provisional description: rps-8 encodes a small ribosomal subunit S8 protein; by homology, RPS-8 is predicted to function in protein biosynthesis; in C. …
179150	WBGene00020246	T05B11.3	P90961	40	3.4722	5	2	0.071	11862	2.10757	TLQLSHDENLKNEK	EKTLQLSHDENLKNEK	6	2	0.071	11290	2.65722	TLQLSHDENLKNEK	EKTLQLSHDENLKNEK	2.38239	WBGene00020246	clic-1	T05B11.3	Concise description: none available Provisional description: none available Detailed description: none available
179627	WBGene00010790	K12G11.3	Q17334	33	3.4555	3	2	0.074	11862	1.26454	KPMEQAVEYVR	QVPVPSPADDEILVK	2	2	0.074	11290	0.88574	KPMEQAVEYVR	QVPVPSPADDEILVK	1.07514	WBGene00010790	sodh-1	K12G11.3	Concise description: none available Provisional description: none available Detailed description: none available
172939	WBGene00009119	F25H2.5	Q93576	63	3.4467	19	6	0.353	11862	8.00877	SMLGATNPLASAPGTIR	NICHGSDAVDSANR	19	7	0.353	11290	8.41453	SMLGATNPLASAPGTIR	NICHGSDAVDSANR	8.21165	WBGene00009119	ndk-1	F25H2.5	Concise description: none available Provisional description: none available Detailed description: none available
175443	WBGene00003795	F59A2.1	Q86G90	38	3.4423	5	2	0.041	11862	2.10757	TIDKEIKPAAEVKK	QQTPSTTAPAKQEENKQSETPK	4	2	0.026	11290	1.77148	TIDKEIKPAAEVKK	SDQKPNMGR	1.93952	WBGene00003795	npp-9	F59A2.1a	Concise description: none available Provisional description: none available Detailed description: none available
175419	WBGene00003175	C44B11.3	P91910	26	3.4281	10	3	0.073	11862	4.21514	VGINYQPPTVVPGGDLAK	VGINYQPPTVVPGGDLAK								2.10757	WBGene00003175	mec-12	C44B11.3	Concise description: mec-12 encodes an alpha-tubulin; MEC-12 is required for normal mechanosensory response to gentle touch, and specifically for formation of the 15-protofilament microtubule bundle present in the touch receptor neurons; mec-12 interacts genetically with mec-5, which encodes a unique C. elegans collagen secreted by the hypodermis; MEC-12 is highly expressed in the touch neurons a…
176148	WBGene00002011	C14B9.1	P34328	37	3.3918	5	3	0.227	11862	2.10757	AYKLPDDVDVSTVK	VSGQELLIHCR	3	1	0.127	11290	1.32861	AYKLPDDVDVSTVK	NA	1.71809	WBGene00002011	hsp-12.2	C14B9.1	Concise description: hsp-12.2 encodes a small heat-shock protein that forms heterotetramers with HSP-12.3 and has no chaperone-like activity; structurally, HSP-12.2 is mostly a beta-sheet; at least one HSP-12 (which may or may not be HSP-12.2) is ubiquitously expressed in L1 larvae, and later expressed in adult spermatids (and perhaps spermatocytes), and some adult vulval cells. Provisional descr…
177203	WBGene00004419	Y24D9A.4	Q966C6	64	3.3456	22	9	0.377	11862	9.27331	TTAAVALVDVNPEDKSALNK	FNIGQDIQPK	19	9	0.321	11290	8.41453	TTAAVALVDVNPEDKSALNK	LVETVNNNFSERHEEIR	8.84392	WBGene00004419	rpl-7A	Y24D9A.4a	Concise description: rpl-7A encodes a large ribosomal subunit L7a protein required in mass RNAi assays for fertility, vulval development, and general health; the rpl-7A transcription unit has one nonsense transcript that is up-regulated in vivo by smg[-] mutations, indicating that rpl-7A is a natural substrate for SMG-mediated nonsense suppresssion; several other natural mRNA substrates of SMG su…
173512	WBGene00006924	F56D12.5	H2KYR1	56	3.3264	16	7	0.251	11862	6.74423	KAGEGAADTFGK	EVIPDREEDEVVVIHK	15	7	0.272	11290	6.64305	EVIPDREEDEVVVIHK	NNTPFNASDDAFPALGAK	6.69364	WBGene00006924	vig-1	F56D12.5a	Concise description: vig-1 encodes a predicted RNA-binding protein orthologous to Drosophila VIG (Vasa Intronic Gene); vig-1 activity is required for proper function of the let-7 miRNA in vivo and thus, for regulating the transition from late larval to adult cell fates; VIG-1 is a component of the 250 kDa RNA-induced silencing complex (RISC) complex and co-immunoprecipates with both TSN-1, the C.…
173309	WBGene00004489	Y105E8A.16	Q8WQA8	65	3.3235	17	6	0.427	11862	7.16574	VCAQLIDGAKNEHLIVK	MAVAFKNEK	16	7	0.53	11290	7.08592	VCAQLIDGAKNEHLIVK	AITDNSEHR	7.12583	WBGene00004489	rps-20	Y105E8A.16	Concise description: rps-20 encodes a small ribosomal subunit S20 protein. Provisional description: rps-20 encodes a small ribosomal subunit S20 protein. Detailed description: none available
176773	WBGene00006439	T27E9.1	Q86CZ9	64	3.3096	19	12	0.213	11862	8.00877	KFLIDLASGGTAAAVSK	LIDLASGGTAAAVSK	21	12	0.21	11290	9.30027	KFLIDLASGGTAAAVSK	FLIDLASGGTAAAVSK	8.65452	WBGene00006439	ant-1.1	T27E9.1a	Concise description: ant-1.1 encodes one of four C. elegans mitochondrial adenine nucleotide transporters; by homology, ANT-1.1 is predicted to facilitate ADP/ATP exchange between the cytosol and mitochondria; ant-1.1 is an essential gene, required for embryogenesis as well as for normal postembryonic body size and adult lifespan; in addition, ANT-1.1 plays a critical role in promoting somatic an…
174560	WBGene00002265	F52H3.7	G5EGB1	50	3.2516	12	4	0.158	11862	5.05817	TADFSGNDVPLHVSVR	MAHESAFPVPYR	11	4	0.158	11290	4.87157	TADFSGNDVPLHVSVR	MAHESAFPVPYR	4.96487	WBGene00002265	lec-2	F52H3.7a	Concise description: lec-2 encodes a 'tandem repeat' type galectin (beta-galactosyl-binding lectin) containing two, tandemly arranged carbohydrate recognition domains; by homology, LEC-2 may play roles in cell adhesion and aggregation, proliferation, or programmed cell death. Provisional description: lec-2 encodes a 'tandem repeat' type galectin (beta-galactosyl-binding lectin) containing two, ta…
176756	WBGene00009952	F53A2.7	O45552	70	3.2464	21	8	0.272	11862	8.8518	HANVGADAVDHVIFGNVVASSR	KGEESFEIDEHPR	25	9	0.299	11290	11.0717	HANVGADAVDHVIFGNVVASSR	KGEESFEIDEHPR	9.96175	WBGene00009952	F53A2.7	F53A2.7	Concise description: none available Provisional description: none available Detailed description: none available
181124	WBGene00006764	ZK721.2	Q9GYF1	53	3.2366	8	5	0.24	11862	3.37211	TISLPNVDSIDDKGQLEK	MSEEAGEDAQRK	6	4	0.198	11290	2.65722	TISLPNVDSIDDKGQLEK	MSEEAGEDAQRK	3.01466	WBGene00006764	unc-27	ZK721.2	Concise description: unc-27 encodes a troponin I isoform; unc-27 is required for coordinated motility and normal muscle morphology; structural analyses indicate that unc-27 is required for proper sarcomeric organization; unc-27/troponin I interacts with the body wall and pharynx types of troponin C; expression studies show that unc-27 is expressed in body wall, vulval and anal muscles. Provisiona…
173071	WBGene00011156	R09B3.3	R09B3.3	60	3.2214	8	3	0.329	11862	3.37211	GFAFVEFTEEAAAQR	AVDQFNGVDFNGR	6	3	0.329	11290	2.65722	GFAFVEFTEEAAAQR	AVDQFNGVDFNGR	3.01466	WBGene00011156	R09B3.3	R09B3.3	Concise description: none available Provisional description: none available Detailed description: none available
174964	WBGene00002264	W09H1.6	O45904	51	3.2118	13	6	0.222	11862	5.47968	TADFSGNDVPLHVSVR	SVLQEKFEPGQTLIVK	11	5	0.172	11290	4.87157	TADFSGNDVPLHVSVR	SVLQEKFEPGQTLIVK	5.17563	WBGene00002264	lec-1	W09H1.6a	Concise description: lec-1 encodes a tandem repeat-type galectin in which each galectin domain is homologous to typical vertebrate 14-kDa-type galectins; the two sugar binding sites have distinct sugar binding properties in vitro and lec-1 is expressed most abundantly in the adult cuticle. Provisional description: lec-1 encodes a tandem repeat-type galectin in which each galectin domain is homolo…
178538	WBGene00004496	F56E10.4	Q9TXP0	69	3.1961	22	9	0.47	11862	9.27331	PLAVDLLHPEPQR	PLAVDLLHPEPQR	17	9	0.337	11290	7.52879	PLAVDLLHPEPQR	PLAVDLLHPEPQR	8.40105	WBGene00004496	rps-27	F56E10.4	Concise description: rps-27 encodes a small ribosomal subunit S27 protein. Provisional description: rps-27 encodes a small ribosomal subunit S27 protein. Detailed description: none available
176071	WBGene00004420	R13A5.8	Q95Y90	62	3.1949	17	7	0.344	11862	7.16574	MKLIESNDTVVFPEGVTFTVK	SVYAHFPINVTLQDGNR	18	6	0.296	11290	7.97166	SVYAHFPINVTLQDGNR	MKLIESNDTVVFPEGVTFTVK	7.5687	WBGene00004420	rpl-9	R13A5.8	Concise description: rpl-9 encodes a large ribosomal subunit L9 protein that affects fertility and embryonic viability. Provisional description: rpl-9 encodes a large ribosomal subunit L9 protein that affects fertility and embryonic viability. Detailed description: none available
172408	WBGene00019322	K02F2.2	P27604	68	3.1917	20	9	0.229	11862	8.43028	TLDEEVAYLHLAQLGVK	ANIIVTTTGCKDIVTGK	22	12	0.256	11290	9.74314	ANIIVTTTGCKDIVTGK	TLDEEVAYLHLAQLGVK	9.08671	WBGene00019322	ahcy-1	K02F2.2	Concise description: ahcy-1 encodes the C. elegans S-adenosylhomocysteine hydrolase (SAHH) ortholog; by homology, AHCY-1 is predicted to catalyze the hydrolysis of S-adenosyl-L-homocysteine to adenosine and L-homocysteine; loss of ahcy-1 activity via RNAi results in embryonic and larval lethality, abnormal body morphology, sick animals, and uncoordinated locomotion; Northern blot analyses indicat…
175628	WBGene00004469	B0393.1	P46769	68	3.188	22	6	0.29	11862	9.27331	MSGGAAHSALTEEDVMK	MSGGAAHSALTEEDVMK	20	7	0.272	11290	8.8574	MSGGAAHSALTEEDVMK	SGGAAHSALTEEDVMK	9.06536	WBGene00004469	rps-0	B0393.1	Concise description: rps-0 encodes a small ribosomal subunit SA protein that appears to function as both a ribosomal component and a laminin receptor; by homology, RPS-0 is predicted to play roles in protein biosynthesis and cell adhesion; in C. elegans, RPS-0 activity is required for embryonic and germline development, vulval morphogenesis, and the overall health of the animal. Provisional descr…
178297	WBGene00004410	Y62E10A.1	Q9U1X9	58	3.1712	8	2	0.191	11862	3.37211	VDDLKNILSAVGVDADAETAK	NILSAVGVDADAETAK	7	2	0.282	11290	3.10009	VDDLKNILSAVGVDADAETAK	AVLGGNANPK	3.2361	WBGene00004410	rla-2	Y62E10A.1	Concise description: rla-2 encodes an acidic ribosomal subunit protein P2. Provisional description: rla-2 encodes an acidic ribosomal subunit protein P2. Detailed description: none available
179522	WBGene00008920	F17C11.9	P54412	61	3.1508	17	6	0.158	11862	7.16574	KEAKPAAAAAQPEDDEPKEEK	EAKPAAAAAQPEDDEPKEEK	16	8	0.158	11290	7.08592	KEAKPAAAAAQPEDDEPKEEK	TVEQYKNELNGQLQVLDR	7.12583	WBGene00008920	eef-1G	F17C11.9a	Concise description: none available Provisional description: none available Detailed description: none available
180718	WBGene00000207	F02E8.1	Q19126	58	3.1265	14	8	0.302	11862	5.9012	AHAASTQAAAATDDAPNFFQK	GLIQEDLKEAVEFKK	13	7	0.246	11290	5.75731	AHAASTQAAAATDDAPNFFQK	GLIQEDLKEAVEFKK	5.82925	WBGene00000207	asb-2	F02E8.1	Concise description: asb-2 encodes the B subunit of the membrane-bound F0 proton channel portion of ATP synthase (mitochondrial respiratory chain [MRC] complex V) that is closely similar to its paralog ASB-1; RNAi experiments indicate that asb-2 activity is required for larval development as well as for normal body morphology, lifespan, and growth rate. Provisional description: asb-2 encodes the …
178169	WBGene00009436	F35G2.2	Q20062	55	3.1113	3	2	0.131	11862	1.26454	LILTSAPDTGLVPLSK	GLVGGSDHPK	5	2	0.151	11290	2.21435	LILTSAPDTGLVPLSK	EGLAENTPIFDKTK	1.73944	WBGene00009436	F35G2.2	F35G2.2	Concise description: none available Provisional description: none available Detailed description: none available
181062	WBGene00001000	C18A11.7	Q18066	69	3.1088	19	8	0.25	11862	8.00877	VGGGAEEIIANSDR	LVGGGAEEIIANSDR	22	8	0.25	11290	9.74314	LVGGGAEEIIANSDR	VGGGAEEIIANSDR	8.87595	WBGene00001000	dim-1	C18A11.7a	Concise description: dim-1 encodes novel proteins containing three immunoglobulin-like repeats in the carboxy terminus; dim-1 was originally identified in screens for mutations that suppress locomotion defects caused by aberrant muscle assembly in animals carrying a missense mutation in unc-112, which encodes a pleckstrin homology domain-containing protein required for the early stages of muscle …
175827	WBGene00017166	F01F1.12	G8JY45	61	3.1062	15	5	0.208	11862	6.32271	MATVGGAFKDSLTQAQKDELHQIALK	RLDAINLENNETNR	17	4	0.208	11290	7.52879	MATVGGAFKDSLTQAQKDELHQIALK	DSLTQAQKDELHQIALK	6.92575	WBGene00017166	aldo-2	F01F1.12a	Concise description: aldo-2 encodes a fructose-bisphosphate aldolase homologous to human ALDOB, which when mutated leads to fructosemia, hereditary fructose intolerance (OMIM:229600). Provisional description: aldo-2 encodes a fructose-bisphosphate aldolase homologous to human ALDOB, which when mutated leads to fructosemia, hereditary fructose intolerance (OMIM:229600). Detailed description: none …
179541	WBGene00007385	C06H2.1	Q17763	62	3.1025	12	5	0.288	11862	5.05817	ALPAHSAVLDSLQK	VPEHAAELTR	14	6	0.33	11290	6.20018	ALPAHSAVLDSLQK	LVPEHAAELTR	5.62918	WBGene00007385	atp-5	C06H2.1	Concise description: none available Provisional description: none available Detailed description: none available
180986	WBGene00018519	F46H5.3	F46H5.3	64	3.0972	16	10	0.351	11862	6.74423	GIHGEHSESEGGVYDISNK	IISMQEGGNVGQVLER	19	8	0.231	11290	8.41453	GIHGEHSESEGGVYDISNK	IISMQEGGNVGQVLER	7.57938	WBGene00018519	F46H5.3	F46H5.3a	Concise description: none available Provisional description: none available Detailed description: none available
174699	WBGene00004478	F40F8.10	Q20228	60	3.0772	10	4	0.212	11862	4.21514	ELLTLEDKDPKR	HIDFSLQSPYGGGRPGR	11	4	0.212	11290	4.87157	HIDFSLQSPYGGGRPGR	ELLTLEDKDPKR	4.54336	WBGene00004478	rps-9	F40F8.10	Concise description: rps-9 encodes a small ribosomal subunit S9 protein. Provisional description: rps-9 encodes a small ribosomal subunit S9 protein. Detailed description: none available
175786	WBGene00004481	F54E7.2	P49196	63	3.0503	15	9	0.571	11862	6.32271	LVETLCAEHQIPLIK	MSDAGGDVQVAPAAVAQGPMDKEGALR	12	9	0.529	11290	5.31444	MSDAGGDVQVAPAAVAQGPMDKEGALR	AILTDYFASKN	5.81858	WBGene00004481	rps-12	F54E7.2	Concise description: rps-12 encodes a small ribosomal subunit S12 protein; by homology, RPS-12 is predicted to function in protein biosynthesis; in C. elegans, RPS-12 activity is required for embryonic and germline development, normal movement, and the overall health of the animal. Provisional description: rps-12 encodes a small ribosomal subunit S12 protein; by homology, RPS-12 is predicted to f…
180872	WBGene00002023	C09B8.6	Q86GU1	53	3.0181	8	4	0.171	11862	3.37211	FDVANYKPEEVTVK	LRFDVANYKPEEVTVK	7	3	0.25	11290	3.10009	FDVANYKPEEVTVK	LRFDVANYKPEEVTVK	3.2361	WBGene00002023	hsp-25	C09B8.6a	Concise description: hsp-25 encodes a member of the small heat shock family of proteins; HSP-25 is expressed throughout development and in vitro, exhibits chaperone activity; HSP-25 localizes to: 1) dense bodies and M lines in body wall muscle, 2) the lining of the pharynx, and 3) to cell-cell junctions in the spermathecal wall; consistent with a role in myofibril organization, HSP-25 binds vincu…
180724	WBGene00003963	C07A12.4	G8JY07	62	3.0069	15	6	0.15	11862	6.32271	AATQLKEEGSDIK	VAFDEKLTQDGLK	16	8	0.178	11290	7.08592	VAFDEKLTQDGLK	FKPDFEEITTENISK	6.70432	WBGene00003963	pdi-2	C07A12.4a	Concise description: pdi-2 encodes a protein disulfide isomerase beta subunit; by homology, PDI-2 is predicted to function in oxidative protein folding in the endoplasmic reticulum (ER); PDI-2 activity is required for several organismal processes including body morphology, locomotion, fertility, molting, and collagen deposition; pdi-2 transcript levels are increased in response to ER stress; pdi-…
177481	WBGene00004473	Y43B11AR.4	Q9N3X2	67	2.9543	18	9	0.363	11862	7.58725	ERLPGASDIIHIK	LPGASDIIHIK	17	8	0.324	11290	7.52879	LPGASDIIHIK	VNDTIVFNISTQK	7.55802	WBGene00004473	rps-4	Y43B11AR.4	Concise description: rps-4 encodes a small ribosomal subunit S4 protein. Provisional description: rps-4 encodes a small ribosomal subunit S4 protein. Detailed description: none available
178117	WBGene00002363	F38H4.9	G5EGK8	42	2.9124	5	2	0.072	11862	2.10757	AKEILEKEPNVQEVR	RGEPHVTR	5	2	0.072	11290	2.21435	AKEILEKEPNVQEVR	RGEPHVTR	2.16096	WBGene00002363	let-92	F38H4.9	Concise description: let-92 encodes a homolog of PP2AC, the catalytic subunit of protein phosphatase 2A (PP2A); let-92 was identified genetically in screens for essential genes on chromosome IV; LET-92 may regulate a number of signal transduction pathways as it is required for embryogenesis, larval development, Ras-mediated vulval development, and axonal guidance in the DD and VD neurons; let-92 …
179025	WBGene00020275	T05H4.12	O16517	51	2.8982	11	6	0.426	11862	4.63665	VDSAVQSALEGQTLASLLEGVKK	AGNLANSDPAVKK	6	4	0.24	11290	2.65722	NAGNLANSDPAVKK	AGNLANSDPAVKK	3.64694	WBGene00020275	atp-4	T05H4.12	Concise description: none available Provisional description: none available Detailed description: none available
176568	WBGene00006533	T28D6.2	O18154	29	2.8895								10	5	0.158	11290	4.4287	SIFVDLEPTVVDEIR	IISQVVSSITASLR	2.21435	WBGene00006533	tba-7	T28D6.2	Concise description: none available Provisional description: none available Detailed description: none available
180601	WBGene00001685	K10B3.7	P17330	29	2.854								11	5	0.158	11290	4.87157	VPTPDVSVVDLTAR	LEKPASLDDIKK	2.43579	WBGene00001685	gpd-3	K10B3.7	Concise description: gpd-3 encodes a predicted glyceraldehyde 3-phosphate dehydrogenase that affects embryonic viability; GPD-3 interacts with LIN-2 in two-hybrid assays. Provisional description: gpd-3 encodes a predicted glyceraldehyde 3-phosphate dehydrogenase that affects embryonic viability; GPD-3 interacts with LIN-2 in two-hybrid assays. Detailed description: none available
174128	WBGene00016630	C44B7.10	Q18599	70	2.8418	21	9	0.274	11862	8.8518	GAAIGNDGLGKPIIALPSISK	IVPTINEGAGVVTSR	14	6	0.178	11290	6.20018	IVPTINEGAGVVTSR	GAAIGNDGLGKPIIALPSISK	7.52599	WBGene00016630	C44B7.10	C44B7.10	Concise description: none available Provisional description: none available Detailed description: none available
175879	WBGene00004472	C23G10.3	P48152	69	2.8346	14	6	0.3	11862	5.9012	KDVQVPAAQPVAPVQ	NALPDHVQIVEPQEEVLPKEPHSQHKEEK	20	10	0.3	11290	8.8574	KDVQVPAAQPVAPVQ	NALPDHVQIVEPQEEVLPKEPHSQHKEEK	7.3793	WBGene00004472	rps-3	C23G10.3	Concise description: rps-3 encodes a small ribosomal subunit S3 protein that contains a KH RNA-binding domain and by homology,is predicted to function in protein biosynthesis; in C. elegans, RPS-3 activity is required for embryonic and germline development, as well as the overall health of the animal. Provisional description: rps-3 encodes a small ribosomal subunit S3 protein that contains a KH R…
175901	WBGene00004482	C16A3.9	P51404	63	2.8262	9	4	0.146	11862	3.79363	MTAEEVQDQIVK	MTAEEVQDQIVK	12	5	0.192	11290	5.31444	MTAEEVQDQIVK	MTAEEVQDQIVK	4.55403	WBGene00004482	rps-13	C16A3.9	Concise description: rps-13 encodes a small ribosomal subunit S13 protein; by homology, RPS-13 is predicted to function in protein biosynthesis; in C. elegans, RPS-13 activity is required for embryonic and germline development. Provisional description: rps-13 encodes a small ribosomal subunit S13 protein; by homology, RPS-13 is predicted to function in protein biosynthesis; in C. elegans, RPS-13 …
177038	WBGene00022089	Y69A2AR.18	Y69A2AR.18	62	2.7961	17	6	0.236	11862	7.16574	AILDSGYDFETGTILFNR	TFFDNIDPVVEGVEKQESK	10	5	0.28	11290	4.4287	TFFDNIDPVVEGVEKQESK	ILNNAGDKEIR	5.79722	WBGene00022089	Y69A2AR.18	Y69A2AR.18a	Concise description: none available Provisional description: none available Detailed description: none available
172070	WBGene00016653	C44E4.4	C44E4.4	39	2.791	3	1	0.038	11862	1.26454	MGETAAAVHDDADQK	NA	4	3	0.073	11290	1.77148	MGETAAAVHDDADQK	TREEAEAAQKAEVK	1.51801	WBGene00016653	C44E4.4	C44E4.4	Concise description: none available Provisional description: none available Detailed description: none available
179739	WBGene00004442	R11D1.8	Q21930	59	2.7872	7	3	0.143	11862	2.9506	GVVVSTKNEK	TPVASVRR	8	3	0.143	11290	3.54296	GVVVSTKNEK	TPVASVRR	3.24678	WBGene00004442	rpl-28	R11D1.8	Concise description: rpl-28 encodes a large ribosomal subunit L28 protein. Provisional description: rpl-28 encodes a large ribosomal subunit L28 protein. Detailed description: none available
175501	WBGene00004414	F13B10.2	G5ECE5	64	2.7697	13	6	0.161	11862	5.47968	SALTEEGKNNGSTEFDLTQK	SALTEEGKNNGSTEFDLTQK	15	7	0.2	11290	6.64305	SALTEEGKNNGSTEFDLTQK	SALTEEGKNNGSTEFDLTQK	6.06137	WBGene00004414	rpl-3	F13B10.2a	Concise description: rpl-3 encodes a large ribosomal subunit L3 protein required in mass RNAi assays for embryonic and larval viability, fertility, and general health; the rpl-3 transcription unit has a nonsense transcript that is up-regulated in vivo by smg[-] mutations, indicating that rpl-3 is a natural substrate for SMG-mediated nonsense suppresssion; several other natural mRNA substrates of …
177366	WBGene00006780	B0350.2	G5ECZ1	46	2.7447	5	2	0.014	11862	2.10757	HVHDSEDGPVVEER	MSEADGKHSEAVQR	6	4	0.027	11290	2.65722	HVHDSEDGPVVEER	KEDANQDNLDQALR	2.38239	WBGene00006780	unc-44	B0350.2a	Concise description: The unc-44 gene encodes an ankyrin-like protein required for proper sex myoblast and axonal guidance during development. Provisional description: Sex myoblasts, which migrate during larval hermaphrodite development, require a gonad-dependent repellent cue to properly reach their precise final positions: this repulsive signal requires the activity of unc-14, unc-33, unc-44, an…
177524	WBGene00019900	R05G6.7	Q21752	56	2.7328	8	5	0.12	11862	3.37211	AGDNKEVEFK	VTLDSLYAPHAGKR	6	4	0.117	11290	2.65722	AGDNKEVEFK	APPTFADLGK	3.01466	WBGene00019900	R05G6.7	R05G6.7	Concise description: none available Provisional description: none available Detailed description: none available
172944	WBGene00009122	F25H2.11	Q93573	63	2.7217	12	6	0.298	11862	5.05817	KEGEIVLAGSNPSAEEGAEDDGSDEHVER	AAEGAENGQVAIIEYR	13	7	0.403	11290	5.75731	AAEGAENGQVAIIEYR	KEGEIVLAGSNPSAEEGAEDDGSDEHVER	5.40774	WBGene00009122	tct-1	F25H2.11	Concise description: none available Provisional description: none available Detailed description: none available
177583	WBGene00004471	C49H3.11	P51403	63	2.7146	13	7	0.243	11862	5.47968	AFVAIGDHAGHVGLGVK	VAIGDHAGHVGLGVK	12	6	0.202	11290	5.31444	AFVAIGDHAGHVGLGVK	VAIGDHAGHVGLGVK	5.39706	WBGene00004471	rps-2	C49H3.11	Concise description: rps-2 encodes a small ribosomal subunit S2 protein. Provisional description: rps-2 encodes a small ribosomal subunit S2 protein. Detailed description: none available
178997	WBGene00000802	Y38A10A.5	P27798	48	2.7137	6	4	0.114	11862	2.52908	KDDDEEEKEEEEGHDEL	HEQGIDCGGGYVK	6	2	0.081	11290	2.65722	KDDDEEEKEEEEGHDEL	EKADEETRKAEEEAR	2.59315	WBGene00000802	crt-1	Y38A10A.5	Concise description: crt-1 encodes an ortholog of calreticulin (a calcium-binding molecular chaperone of the endoplasmic reticulum); crt-1 is dispensable for viability, but required for normal sperm development, male mating efficiency, some forms of necrotic cell death, and hermaphrodite fertility at high temperatures (which may reflect a stress response); crt-1 expression is induced by stress; C…
175141	WBGene00012179	W01D2.1	W01D2.1	48	2.7102	5	3	0.217	11862	2.10757	EGTTPKPR	SFHIQK	4	2	0.152	11290	1.77148	EGTTPKPR	SFHIQK	1.93952	WBGene00012179	W01D2.1	W01D2.1	Concise description: none available Provisional description: none available Detailed description: none available
172901	WBGene00004476	ZC434.2	Q23312	58	2.7067	11	6	0.304	11862	4.63665	VHLDKSHQTNVGHK	SDGKVVSEIEK	11	3	0.232	11290	4.87157	VHLDKSHQTNVGHK	SDGKVVSEIEK	4.75411	WBGene00004476	rps-7	ZC434.2	Concise description: rps-7 encodes a small ribosomal subunit S7 protein. Provisional description: rps-7 encodes a small ribosomal subunit S7 protein. Detailed description: none available
180692	WBGene00006921	F20B6.2	Q19626	68	2.6959	15	8	0.169	11862	6.32271	IPIFSASGLPHNEIAAQIVR	MAAVDVNQPITGHK	15	8	0.175	11290	6.64305	IPIFSASGLPHNEIAAQIVR	MAAVDVNQPITGHK	6.48288	WBGene00006921	vha-12	F20B6.2	Concise description: vha-12 encodes an ortholog of subunit B of the cytoplasmic (V1) domain of vacuolar proton-translocating ATPase (V-ATPase); VHA-12 is orthologous to human ATP6V1B1 (OMIM:192132, mutated in distal renal tubular acidosis with progressive sensorineural deafness) and ATP6V1B2 (OMIM:606939); VHA-12 and TAG-300/Y110A7A.12 are co-orthologs; VHA-17, like VHA-1 and VHA-12, antagonizes …
178342	WBGene00004430	Y45F10D.12	O45946	67	2.6867	16	7	0.404	11862	6.74423	ILAAGGEIITLDQLALK	ILAAGGEIITLDQLALKSPK	13	6	0.314	11290	5.75731	SPKGENTVFLQGPR	ISVAALHVTEGAR	6.25077	WBGene00004430	rpl-18	Y45F10D.12	Concise description: rpl-18 encodes a large ribosomal subunit L18 protein. Provisional description: rpl-18 encodes a large ribosomal subunit L18 protein. Detailed description: none available
181789	WBGene00020732	T23E7.2	T23E7.2	50	2.6724	8	5	0.091	11862	3.37211	ATPAATPAATATPAATATPAATGTPK	SAVPSEAPPTPR	7	4	0.078	11290	3.10009	ATPAATPAATATPAATATPAATGTPK	SAVPSEAPPTPR	3.2361	WBGene00020732	T23E7.2	T23E7.2a	Concise description: none available Provisional description: none available Detailed description: none available
172313	WBGene00004486	T08B2.10	O01692	70	2.6611	16	7	0.523	11862	6.74423	VCDEVAIIGSKPLR	AAGFNLPNVTVEDQGK	15	6	0.3	11290	6.64305	VCDEVAIIGSKPLR	AAGFNLPNVTVEDQGK	6.69364	WBGene00004486	rps-17	T08B2.10	Concise description: rps-17 encodes a small ribosomal subunit S17 protein. Provisional description: rps-17 encodes a small ribosomal subunit S17 protein. Detailed description: none available
171949	WBGene00004425	C32E8.2	P91128	68	2.6495	15	7	0.275	11862	6.32271	GDVLPLSHTITFDEPR	KGDSSAEELKVAAQLR	14	7	0.304	11290	6.20018	GDVLPLSHTITFDEPR	KGDSSAEELKVAAQLR	6.26145	WBGene00004425	rpl-13	C32E8.2a	Concise description: rpl-13 encodes a large ribosomal subunit L13 protein. Provisional description: rpl-13 encodes a large ribosomal subunit L13 protein. Detailed description: none available
173260	WBGene00004475	Y71A12B.1	I2HAF8	68	2.6495	15	7	0.277	11862	6.32271	KGDGEIEGLTDSVLPR	KGDGEIEGLTDSVLPR	14	7	0.244	11290	6.20018	KGDGEIEGLTDSVLPR	KGDGEIEGLTDSVLPR	6.26145	WBGene00004475	rps-6	Y71A12B.1a	Concise description: rps-6 encodes a small (40S) ribosomal subunit S6 protein; loss of rps-6 activity in adult animals extends lifespan. Provisional description: rps-6 encodes a small (40S) ribosomal subunit S6 protein; loss of rps-6 activity in adult animals extends lifespan. Detailed description: none available
179209	WBGene00000219	F21F8.7	O01530	52	2.6481	10	4	0.185	11862	4.21514	SKFDSTASSTFVK	TVDVISDTGTSFLGGPQSVVDGLAK	7	3	0.141	11290	3.10009	SKFDSTASSTFVK	TVDVISDTGTSFLGGPQSVVDGLAK	3.65761	WBGene00000219	asp-6	F21F8.7	Concise description: aspartic protease. Provisional description: aspartic protease. Detailed description: none available
179302	WBGene00000215	T18H9.2	Q86NE1	39	2.6247	2	2	0.056	11862	0.843028	MSAIGSGSYHSSK	FIIEYGTGSAR	4	2	0.056	11290	1.77148	MSAIGSGSYHSSK	FIIEYGTGSAR	1.30725	WBGene00000215	asp-2	T18H9.2a	Concise description: asp-2 encodes aspartic protease. Provisional description: asp-2 encodes aspartic protease. Detailed description: none available
178407	WBGene00013311	Y57G11C.15	O18239	42	2.6225	3	2	0.025	11862	1.26454	IIEVGDTPKDR	IEVGDTPKDR	3	1	0.025	11290	1.32861	IIEVGDTPKDR	NA	1.29658	WBGene00013311	Y57G11C.15	Y57G11C.15a	Concise description: none available Provisional description: none available Detailed description: none available
178083	WBGene00004480	F40F11.1	Q20206	65	2.5934	14	6	0.258	11862	5.9012	DIHPGDLVTIGECRPLSK	DAVEGTYIDKK	11	5	0.258	11290	4.87157	DIHPGDLVTIGECRPLSK	DAVEGTYIDKK	5.38638	WBGene00004480	rps-11	F40F11.1	Concise description: rps-11 encodes a small ribosomal subunit S11 protein; by homology, RPS-11 is predicted to function in protein biosynthesis; in C. elegans, RPS-11 activity is required for embryonic and germline development, as well as the overall health of the animal; loss of rps-11 activity in adult animals extends lifespan. Provisional description: rps-11 encodes a small ribosomal subunit S…
266858	WBGene00006434	F09E5.15	Q8IG31	69	2.569	13	8	0.402	11862	5.47968	KHGGLGEMNIPVLADTNHQISR	GLFIIDPSQNLR	15	8	0.402	11290	6.64305	KHGGLGEMNIPVLADTNHQISR	GLFIIDPSQNLR	6.06137	WBGene00006434	prdx-2	F09E5.15a	Concise description: prdx-2 encodes one of two C. elegans typical 2-Cys peroxiredoxins, peroxidase enzymes that reduce hydrogen peroxide and contribute to the oxidative-stress response of multicellular organisms; loss of prdx-2 activity results in increased sensitivity to sublethal doses of hydrogen peroxide and increased resistance to heavy metals, likely via increased expression of Phase II det…
178873	WBGene00002010	C37H5.8	P11141	65	2.5682	15	7	0.154	11862	6.32271	ELVEVINQAEGIIHDTEAK	EQGVDLTKDPQAMQR	10	6	0.102	11290	4.4287	EQGVDLTKDPQAMQR	AKFEQIVGDLIK	5.3757	WBGene00002010	hsp-6	C37H5.8	Concise description: hsp-6 encodes a nuclear-encoded mitochondrion-specific chaperone that is a member of the DnaK/Hsp70 superfamily of molecular chaperones; hsp-6 is involved in the mitochondrial unfolded protein response, as hsp-6 expression, normally broadly detected from the L1 larval through adult stages of development, is greatly increased in response to treatments that disrupt mitochondria…
176146	WBGene00004433	C14B9.7	P34334	65	2.5174	14	7	0.304	11862	5.9012	GAVGIIVNKR	RLPVAPR	10	5	0.267	11290	4.4287	GAVGIIVNKR	RLPVAPR	5.16495	WBGene00004433	rpl-21	C14B9.7	Concise description: rpl-21 encodes a large ribosomal subunit L21 protein; by homology, RPL-21 is predicted to function in protein biosynthesis; in C. elegans, RPL-21 activity is required for embryonic and germline development. Provisional description: rpl-21 encodes a large ribosomal subunit L21 protein; by homology, RPL-21 is predicted to function in protein biosynthesis; in C. elegans, RPL-21 …
178408	WBGene00004487	Y57G11C.16	O18240	68	2.5122	12	7	0.396	11862	5.05817	MSLIIPEKFQHIHR	TGQLLSTAVDNK	14	7	0.338	11290	6.20018	TGQLLSTAVDNK	MSLIIPEKFQHIHR	5.62918	WBGene00004487	rps-18	Y57G11C.16	Concise description: rps-18 encodes a small ribosomal subunit S18 protein. Provisional description: This gene encodes a protein predicted by Eisenberg and coworkers, with 52 percentage accuracy, to be mitochondrial. Proteins localized to a given organelle by experiments tend to share a characteristic phylogenetic distribution of their homologs, called a phylogenetic profile. For instance, mitocho…
176007	WBGene00004450	F37C12.4	P49181	63	2.5095	9	4	0.375	11862	3.79363	MSGPGIEGLAVGLNK	SGPGIEGLAVGLNK	11	5	0.375	11290	4.87157	REELQNVIIAQR	MSGPGIEGLAVGLNK	4.3326	WBGene00004450	rpl-36	F37C12.4	Concise description: rpl-36 encodes a large ribosomal subunit L36 protein; by homology, RPL-36 is predicted to function in protein biosynthesis; in C. elegans, RPL-36 activity is required for embryonic and germline development and normal postembryonic growth rates. Provisional description: rpl-36 encodes a large ribosomal subunit L36 protein; by homology, RPL-36 is predicted to function in protei…
174423	WBGene00011884	T21B10.2	Q27527	67	2.5015	11	5	0.163	11862	4.63665	AAVPSGASTGVHEALELR	VNQIGSVTESIEAAK	14	6	0.187	11290	6.20018	VNQIGSVTESIEAAK	GNPTVEVDLFTEK	5.41842	WBGene00011884	enol-1	T21B10.2a	Concise description: enol-1 is orthologous to human ENOLASE 1 (also CRYSTALLIN, TAU; ENO1; OMIM:172430), which when mutated leads to spherocytic red cell enolase deficiency. Provisional description: enol-1 is orthologous to human ENOLASE 1 (also CRYSTALLIN, TAU; ENO1; OMIM:172430), which when mutated leads to spherocytic red cell enolase deficiency. Detailed description: none available
171901	WBGene00020915	W01B11.3	O45012	50	2.4999	5	2	0.029	11862	2.10757	FDDNEESTNAIKK	RFDDNEESTNAIKK	6	3	0.06	11290	2.65722	SSVDETEKLAVGDAK	FDDNEESTNAIKK	2.38239	WBGene00020915	nol-5	W01B11.3	Concise description: none available Provisional description: none available Detailed description: none available
173167	WBGene00006529	C47B2.3	P34690	56	2.4965	23	9	0.261	11862	9.69482	FDGALNVDLNEFQTNLVPYPR	SIFVDLEPTVVDEIR								4.84741	WBGene00006529	tba-2	C47B2.3	Concise description: tba-2 encodes an alpha-tubulin. Provisional description: In large-scale RNAi assays, tba-2 was found to affect embryonic viability and spindle structure. Detailed description: none available
178279	WBGene00004424	JC8.3	P61866	59	2.4776	8	5	0.412	11862	3.37211	HNGDLTVDTIIK	IDVVPSAASLIVK	11	6	0.291	11290	4.87157	HNGDLTVDTIIK	IDVVPSAASLIVK	4.12184	WBGene00004424	rpl-12	JC8.3a	Concise description: rpl-12 encodes a large ribosomal subunit L12 protein required in mass RNAi assays for embryonic viability, fertility, normally rapid growth, and general health; the rpl-12 transcription unit has a nonsense transcript that is up-regulated in vivo by smg[-] mutations, indicating that rpl-12 is a natural substrate for SMG-mediated nonsense suppresssion; several other natural mRN…
175936	WBGene00003162	F20H11.3	O02640	60	2.4713	12	5	0.276	11862	5.05817	SQAFVSELKGHDASK	TVVPVVGGHAGITIIPLLSQVKPSTK	7	4	0.208	11290	3.10009	SQAFVSELKGHDASK	IQDAGTEVVNAK	4.07913	WBGene00003162	mdh-2	F20H11.3	Concise description: mdh-2 encodes a homolog of malate dehydrogenase that is predicted to be mitochondrial. Provisional description: This gene encodes a protein predicted by Eisenberg and coworkers, with 52 percentage accuracy, to be mitochondrial. Detailed description: none available
3565440	WBGene00002077	C53D5.6	Q9N5V3	38	2.4657	2	2	0.022	11862	0.843028	QAEEVYEKIEGPTK	LDFGLHDGVR	2	2	0.022	11290	0.88574	QAEEVYEKIEGPTK	LDFGLHDGVR	0.864384	WBGene00002077	imb-3	C53D5.6	Concise description: imb-3 encodes an importin-beta-like protein orthologous to Drosophila, vertebrate, and yeast importin/karyopherin-beta3; IMB-3 is predicted to function as a nuclear transport factor that, with the RAN-1 GTPase, regulates nuclear import of ribosomal proteins; in C. elegans, IMB-3 is essential for embryogenesis and germline development, and may also be required for normal poste…
171854	WBGene00022114	Y71F9AL.9	Y71F9AL.9	53	2.4633	6	4	0.118	11862	2.52908	KTETAAPETTQSAPAPAK	AAPAPTVAAPASSSVTK	6	3	0.118	11290	2.65722	SKKTETAAPETTQSAPAPAK	AAPAPTVAAPASSSVTK	2.59315	WBGene00022114	Y71F9AL.9	Y71F9AL.9	Concise description: none available Provisional description: none available Detailed description: none available
3564970	WBGene00013025	Y49A3A.2	Q9XW92	64	2.4447	14	8	0.124	11862	5.9012	TALVANTSNMPVAAR	VGGHVTGGDIIGTVDENLLIK	8	4	0.063	11290	3.54296	VGHQELVGEIIR	VGHQELVGEIIR	4.72208	WBGene00013025	vha-13	Y49A3A.2	Concise description: vha-13 encodes an ortholog of subunit A of the cytoplasmic (V1) domain of vacuolar proton-translocating ATPase (V-ATPase); VHA-13 is predicted to hydrolyse ATP as part of a cytosolic VHA-12/VHA-13 heterohexamer, whose activity drives the V-ATPase rotor; VHA-13 levels are lowered in mutants with either abnormally low or abnormally high calcineurin levels, and elevated in mutan…
176512	WBGene00004736	K11D9.2	G5EEK8	46	2.4383	4	4	0.056	11862	1.68606	AKELVPGDLVEVSVGDKIPADLR	IGLFGENEDTTGK	6	5	0.083	11290	2.65722	AKELVPGDLVEVSVGDKIPADLR	IGLFGENEDTTGK	2.17164	WBGene00004736	sca-1	K11D9.2a	Concise description: The sca-1 gene encodes a sarco-endoplasmic reticulum Ca[2+] ATPase homolog that is required for development and muscle function; sca-1 is also a ortholog of human ATP2A1 (OMIM:108730), which when mutated leads to Darier-White disease (OMIM:124200). Provisional description: The sca-1 gene encodes a sarco-endoplasmic reticulum Ca[2+] ATPase homolog that is required for developm…
174371	WBGene00004416	F54C9.5	P49405	65	2.4206	9	3	0.181	11862	3.79363	GVADGGINVPHSESR	TIGLDSTYKGHEELTGEDYNVEEEGDRAPFK	13	4	0.181	11290	5.75731	GVADGGINVPHSESR	TIGLDSTYKGHEELTGEDYNVEEEGDRAPFK	4.77547	WBGene00004416	rpl-5	F54C9.5	Concise description: rpl-5 encodes a large ribosomal subunit L5 protein; by homology, RPL-5 is predicted to function in protein biosynthesis; in C. elegans RPL-5 activity is broadly required for embryonic, larval, germline, and vulval development, as well as normal body coloration, morphology, and postembryonic growth rates. Provisional description: rpl-5 encodes a large ribosomal subunit L5 prot…
176437	WBGene00000833	T20G5.2	P34575	59	2.4101	8	5	0.128	11862	3.37211	STSAEGSTNLKEVLSK	ITPGILLEQGK	10	5	0.143	11290	4.4287	STSAEGSTNLKEVLSK	ITPGILLEQGK	3.90041	WBGene00000833	cts-1	T20G5.2	Concise description: cts-1 encodes a citrate synthase; by homology, CTS-1 is predicted to function in the citric acid cycle to catalyze the formation of citrate from oxaloacetate and acetyl-CoA; cts-1 is required for embryonic development. Provisional description: This gene encodes a protein predicted by Eisenberg and coworkers, with 52 percentage accuracy, to be mitochondrial. Proteins localized…
179063	WBGene00020950	W02F12.5	O45148	52	2.4083	7	3	0.121	11862	2.9506	SAPPVARPPSTPSSSTPVGAVPVTR	LQPGAGGGSSSAPAKEEPK	7	3	0.121	11290	3.10009	LQPGAGGGSSSAPAKEEPK	GVDPSHAITGAR	3.02535	WBGene00020950	dlst-1	W02F12.5	Concise description: none available Provisional description: none available Detailed description: none available
172693	WBGene00004484	F36A2.6	Q9XVP0	67	2.3996	10	5	0.258	11862	4.21514	MATQDDAHLAELKK	GVDLDQLLDMSR	13	5	0.252	11290	5.75731	MATQDDAHLAELKK	GVDLDQLLDMSR	4.98623	WBGene00004484	rps-15	F36A2.6	Concise description: rps-15 encodes a small ribosomal subunit S15 protein. Provisional description: rps-15 encodes a small ribosomal subunit S15 protein. Detailed description: none available
174059	WBGene00019061	F58F12.1	F58F12.1	57	2.3873	8	5	0.344	11862	3.37211	AEEVLKVEEIDESAAR	AAAAPAANANPEELR	7	3	0.202	11290	3.10009	AAAAPAANANPEELR	AEEVLKVEEIDESAAR	3.2361	WBGene00019061	F58F12.1	F58F12.1	Concise description: F58F12.1 encodes the delta subunit of the soluble, catalytic F1 portion of ATP synthase (mitochondrial respiratory chain [MRC] complex V); RNAi experiments indicate that F58F12.1 activity is essential for embryonic and larval development, as well as for reproduction and normal rates of growth and development. Provisional description: F58F12.1 encodes the delta subunit of the …
172831	WBGene00006528	F26E4.8	H2L2E8	59	2.3822								21	7	0.185	11290	9.30027	SIFVDLEPTVVDEIR	IISQVVSSITASLR	4.65013	WBGene00006528	tba-1	F26E4.8a	Concise description: tba-1 encodes one of nine C. elegans alpha-tubulins; in early embryos, tba-1 is required, partially redundantly with the closely related tba-2, for a number of microtubule-dependent processes and hence, for normal embryonic development; wild-type tba-1 activity is also required for cell migrations as well as motor neuron synapse and axon development; tba-1 is transcribed duri…
173342	WBGene00004495	F39B2.6	O45499	59	2.3407	8	2	0.239	11862	3.37211	DIGDASAYTQYALPK	AAAARPGAPGPRP	9	2	0.239	11290	3.98583	AAAARPGAPGPRP	DIGDASAYTQYALPK	3.67897	WBGene00004495	rps-26	F39B2.6	Concise description: rps-26 encodes a small ribosomal subunit S26 protein; by homology, RPS-26 is predicted to function in protein biosynthesis; in C. elegans, RPS-26 activity is required for embryonic, larval, and germline development, as well as normal locomotion and body morphology. Provisional description: rps-26 encodes a small ribosomal subunit S26 protein; by homology, RPS-26 is predicted …
177880	WBGene00010677	K08F4.2	Q21351	41	2.3152	3	2	0.049	11862	1.26454	APVPEPVQEQPK	KVLDSPNDTSK	3	2	0.049	11290	1.32861	KVLDSPNDTSK	APVPEPVQEQPK	1.29658	WBGene00010677	K08F4.2	K08F4.2	Concise description: none available Provisional description: none available Detailed description: none available
181699	WBGene00002051	F52E10.5	Q21065	31	2.2948	7	3	0.059	11862	2.9506	QIEDLNYQLEDDQR	TILEEIDFMKR								1.4753	WBGene00002051	ifa-3	F52E10.5	Concise description: ifa-3 encodes an essential intermediate filament protein that is coexpressed with the essential IF protein IFB-1; IFA-3 is required for survival past early larval stages, correct positioning of excretory canals and body muscles, attachment of cuticle to hypodermis, and locomotion; IFA-3 forms heteropolymeric intermediate filaments in vitro with an equimolar mixture of IFB-1; …
171768	WBGene00004014	Y37E3.9	Q9BKU4	54	2.2702	4	3	0.095	11862	1.68606	KIEAAEEIAER	AAVTTAEGDAQAAK	4	2	0.095	11290	1.77148	KIEAAEEIAER	IAAVTTAEGDAQAAK	1.72877	WBGene00004014	phb-1	Y37E3.9	Concise description: phb-1 encodes the C. elegans ortholog of prohibitin PHB1; loss of phb-1 activity via RNAi indicates that phb-1 function is required for mitochondrial organization and morphology and for embryonic, germline, and somatic gonad development; PHB-1, along with prohibitin subunit PHB-2, forms a macromolecular complex that localizes to mitochondrial membranes; PHB-1 and PHB-2 are de…
175027	WBGene00001884	ZK131.4	P62784	58	2.2462	4	2	0.126	11862	1.68606	DNIQGITKPAIR	DNIQGITKPAIRR	7	4	0.223	11290	3.10009	DNIQGITKPAIR	NIQGITKPAIR	2.39308	WBGene00001884	his-10	ZK131.4	Concise description: his-10 encodes an H4 histone. Provisional description: his-10 encodes an H4 histone. Detailed description: none available
178188	WBGene00004492	F28D1.7	Q19877	65	2.2401	11	4	0.28	11862	4.63665	SGHAVGDIPGVR	SGHAVGDIPGVR	8	2	0.084	11290	3.54296	SGHAVGDIPGVR	SGHAVGDIPGVR	4.08981	WBGene00004492	rps-23	F28D1.7	Concise description: rps-23 encodes a small ribosomal subunit S23 protein; by homology, RPS-23 is predicted to function in protein biosynthesis; in C. elegans, RPS-23 activity is required for germline development, vulval morphogenesis, and the overall health of the animal. Provisional description: rps-23 encodes a small ribosomal subunit S23 protein; by homology, RPS-23 is predicted to function i…
171736	WBGene00006771	Y71G12B.11	G5EGK1	27	2.1627								4	3	0.019	11290	1.77148	HSQLLTEQFQHEAHQRPEHR	EQGITEEETLILR	0.88574	WBGene00006771	tln-1	not known	Concise description: none available Provisional description: none available Detailed description: none available
177906	WBGene00008506	F01G10.1	O17759	58	2.1554	8	4	0.121	11862	3.37211	KIDSDIEGHPTPR	VVTTEDHYAAGGIGEAVSAALADYPTIR	6	3	0.076	11290	2.65722	KIDSDIEGHPTPR	TVSEQLRNDLEDAANR	3.01466	WBGene00008506	tkt-1	F01G10.1	Concise description: tkt-1 encodes an ortholog of the human gene TRANSKETOLASE (TKT; OMIM:606781), which when mutated leads to Wernicke-Korsakoff syndrome (OMIM:277730). Provisional description: tkt-1 encodes an ortholog of the human gene TRANSKETOLASE (TKT; OMIM:606781), which when mutated leads to Wernicke-Korsakoff syndrome (OMIM:277730). Detailed description: none available
176097	WBGene00004449	ZK652.4	P34662	66	2.1515	9	4	0.163	11862	3.79363	KLDEQKTELATLR	LDEQKTELATLR	9	4	0.163	11290	3.98583	KLDEQKTELATLR	LDEQKTELATLR	3.88973	WBGene00004449	rpl-35	ZK652.4	Concise description: rpl-35 encodes a large ribosomal subunit L35 protein. Provisional description: rpl-35 encodes a large ribosomal subunit L35 protein. Detailed description: none available
177775	WBGene00010317	F59B8.2	H9G2T3	57	2.1192	6	2	0.064	11862	2.52908	TVEAEAAHGTVTR	NILGGTVFREPIIVK	7	3	0.101	11290	3.10009	TVEAEAAHGTVTR	NILGGTVFREPIIVK	2.81459	WBGene00010317	idh-1	F59B8.2a	Concise description: idh-1 encodes a predicted cytosolic isocitrate dehydrogenase; by homology, IDH-1 is predicted to catalyze the formation of alpha-ketoglutarate from isocitrate. Provisional description: idh-1 encodes a predicted cytosolic isocitrate dehydrogenase; by homology, IDH-1 is predicted to catalyze the formation of alpha-ketoglutarate from isocitrate. Detailed description: none availa…
180345	WBGene00012615	Y38H6C.1	Q9XX57	68	2.083	5	2	0.367	11862	2.10757	KKAELIEAAK	KKDDEPERDAATSLAIITK	2	1	0.241	11290	0.88574	KKDDEPERDAATSLAIITK	NA	1.49666	WBGene00012615	dct-16	Y38H6C.1a	Concise description: none available Provisional description: none available Detailed description: none available
173161	WBGene00003989	Y18D10A.20	Q9XW16	58	2.0826	6	2	0.174	11862	2.52908	GADIEGVHYVVPR	TEESLIFGKK	7	2	0.174	11290	3.10009	GADIEGVHYVVPR	TEESLIFGKK	2.81459	WBGene00003989	pfn-1	Y18D10A.20	Concise description: none available Provisional description: none available Detailed description: none available
177365	WBGene00004494	K02B2.5	P52821	62	2.0642	7	3	0.154	11862	2.9506	AGLKELQAK	AGLKELQAK	7	5	0.248	11290	3.10009	AGLKELQAK	AGLKELQAK	3.02535	WBGene00004494	rps-25	K02B2.5	Concise description: rps-25 encodes a small ribosomal subunit S25 protein. Provisional description: rps-25 encodes a small ribosomal subunit S25 protein. Detailed description: none available
172216	WBGene00006919	F46F11.5	P91303	63	2.0559	8	3	0.349	11862	3.37211	MASQTQGIQQLLAAEKR	AFEQQYLGTKEDIESK	7	3	0.349	11290	3.10009	AFEQQYLGTKEDIESK	MASQTQGIQQLLAAEKR	3.2361	WBGene00006919	vha-10	F46F11.5	Concise description: vha-10 encodes an ortholog of subunit G of the cytoplasmic (V1) domain of vacuolar proton-translocating ATPase (V-ATPase); VHA-10 is required for necrosis, since vha-10(RNAi) suppresses necrotic neurodegeneration and thapsigargin-induced cell death; VHA-10 is a predicted cytosolic stator (stalk) component. Provisional description: vha-10 encodes an ortholog of subunit G of th…
180748	WBGene00004438	F55D10.2	P48162	58	1.9784	6	4	0.224	11862	2.52908	IIQHPLTTESAMK	IIQHPLTTESAMK	5	3	0.177	11290	2.21435	IIQHPLTTESAMK	IIQHPLTTESAMK	2.37172	WBGene00004438	rpl-25.1	F55D10.2	Concise description: rpl-25.1 encodes a large ribosomal subunit L23a protein. Provisional description: rpl-25.1 encodes a large ribosomal subunit L23a protein. Detailed description: none available
3565504	WBGene00001684	K10B3.8	P17329	56	1.9477	14	5	0.232	11862	5.9012	VPTPDVSVVDLTAR	LEKPASLDDIKK								2.9506	WBGene00001684	gpd-2	K10B3.8	Concise description: gpd-2 encodes one of four C. elegans glyceraldehyde-3-phosphate dehydrogenases (GAPDHs); by homology, GPD-2 is predicted to reversibly catalyze the oxidation and phosphorylation of glyceraldehyde-3-phosphate to 1,3-diphosphoglycerate during glycolysis; in C. elegans, GPD-2 and GPD-3 constitute the major GAPDH isoenzymes and are expressed at highest levels during postembryonic…
174311	WBGene00004421	F10B5.1	Q09533	66	1.8975	7	4	0.089	11862	2.9506	RSDGVGVQLQR	LRSDGVGVQLQR	7	5	0.14	11290	3.10009	RSDGVGVQLQR	SDGVGVQLQR	3.02535	WBGene00004421	rpl-10	F10B5.1	Concise description: rpl-10 encodes a large ribosomal subunit L10 protein required in mass RNAi assays for embryonic viability, fertility, normally rapid growth, and normal body coloration; the rpl-10 transcription unit has a nonsense transcript that is up-regulated in vivo by smg[-] mutations, indicating that rpl-10 is a natural substrate for SMG-mediated nonsense suppresssion; several other nat…
175413	WBGene00006725	H06I04.4	P37165	62	1.8839	5	2	0.117	11862	2.10757	CHDTLVVDTATAAATSGEK	HDTLVVDTATAAATSGEK	5	2	0.117	11290	2.21435	CHDTLVVDTATAAATSGEK	HDTLVVDTATAAATSGEK	2.16096	WBGene00006725	ubl-1	H06I04.4a	Concise description: ubl-1 encodes a protein similar to Drosophila ubiquitin/ ribosomal protein S27a that affects body length, fertility, and larval viability. Provisional description: ubl-1 encodes a protein similar to Drosophila ubiquitin/ ribosomal protein S27a that affects body length, fertility, and larval viability. Detailed description: none available
180111	WBGene00000776	T03E6.7	H9G333	54	1.862	4	2	0.202	11862	1.68606	KLGQLVSLSEQNLVDCSTK	TVGADDKGYVDTPEGDEEQLK	5	3	0.283	11290	2.21435	KLGQLVSLSEQNLVDCSTK	TVGADDKGYVDTPEGDEEQLK	1.9502	WBGene00000776	cpl-1	T03E6.7a	Concise description: cpl-1 encodes a member of the cathepsin L-like cysteine protease family required for embryonic viability and normal growth; expressed in eggshells and throughout early embryos, accumulates in intestinal cells during late embryogenesis, and expressed in the cuticle, gonad, and pharynx later in development. Provisional description: cpl-1 encodes a member of the cathepsin L-like…
173224	WBGene00006936	Y87G2A.5	Q9U1Q4	48	1.8438	4	3	0.039	11862	1.68606	SLGNVIDPLDVIR	EQTVEAAEPVDQTPTGQR	2	1	0.017	11290	0.88574	EQTVEAAEPVDQTPTGQR	NA	1.2859	WBGene00006936	vars-2	Y87G2A.5	Concise description: vrs-2 encodes a predicted cytoplasmic valyl-tRNA synthetase (ValRS), a class I aminoacyl-tRNA synthetase that catalyzes the attachment of valine to its cognate tRNA and is thus required for protein biosynthesis; in C. elegans, VRS-2 activity is required for embryonic and germline development. Provisional description: vrs-2 encodes a predicted cytoplasmic valyl-tRNA synthetase…
180251	WBGene00000214	Y39B6A.20	G5EEI4	55	1.8231	5	3	0.106	11862	2.10757	TQPDLIFTIGGAQFPVK	NLQIAQGTPGGLITYGAIDTVNCAK	4	2	0.098	11290	1.77148	NLQIAQGTPGGLITYGAIDTVNCAK	TQACNGYPDSGYTK	1.93952	WBGene00000214	asp-1	Y39B6A.20	Concise description: asp-1 encodes a homolog of cathepsin D aspartic protease; it is transcribed exclusively in intestinal cells of the late embryo and early larvae and is not observed in older larvae or adults; ASP-1 is dispensable for neuronal degeneration. Provisional description: asp-1 encodes a homolog of cathepsin D aspartic protease; it is transcribed exclusively in intestinal cells of the…
175772	WBGene00018963	F56D2.1	P98080	52	1.8178	5	3	0.076	11862	2.10757	TNLYQNLETNTQK	HVYDRDLAAVGVGR	3	3	0.076	11290	1.32861	TNLYQNLETNTQK	HVYDRDLAAVGVGR	1.71809	WBGene00018963	ucr-1	F56D2.1	Concise description: none available Provisional description: none available Detailed description: none available
174443	WBGene00004446	T24B8.1	B7WN95	65	1.7837	6	4	0.179	11862	2.52908	GEIGHGVSAK	IGEIGHGVSAK	6	4	0.172	11290	2.65722	GEIGHGVSAK	IGEIGHGVSAK	2.59315	WBGene00004446	rpl-32	T24B8.1a	Concise description: rpl-32 encodes a large ribosomal subunit L32 protein. Provisional description: rpl-32 encodes a large ribosomal subunit L32 protein. Detailed description: none available
179945	WBGene00009082	F23B12.5	dlat-1	55	1.7569	4	2	0.069	11862	1.68606	ILIQEGSKDVPIGK	KLAAENGLDLSGVSGSGPGGR	4	3	0.091	11290	1.77148	ILIQEGSKDVPIGK	KLAAENGLDLSGVSGSGPGGR	1.72877	WBGene00009082	dlat-1	F23B12.5	Concise description: F23B12.5 is orthologous to the human gene DIHYDROLIPOAMIDE DEHYDROGENASE (DLD; OMIM:109720), which when mutated leads to lactic acidosis due to lipoamide dehydrogenase deficiency. Provisional description: F23B12.5 is orthologous to the human gene DIHYDROLIPOAMIDE DEHYDROGENASE (DLD; OMIM:109720), which when mutated leads to lactic acidosis due to lipoamide dehydrogenase defic…
178387	WBGene00010794	LLC1.3	O17953	50	1.7248	4	2	0.071	11862	1.68606	SNTQDADLVVIGGGPGGYVAAIK	KNDGSVETINAR	2	2	0.071	11290	0.88574	KNDGSVETINAR	SNTQDADLVVIGGGPGGYVAAIK	1.2859	WBGene00010794	dld-1	LLC1.3a	Concise description: LLC1.3 is orthologous to the human gene DIHYDROLIPOAMIDE DEHYDROGENASE (DLD; OMIM:246900), which when mutated leads to dihydrolipoamide dehydrogenase deficiency. Provisional description: LLC1.3 is orthologous to the human gene DIHYDROLIPOAMIDE DEHYDROGENASE (DLD; OMIM:246900), which when mutated leads to dihydrolipoamide dehydrogenase deficiency. Detailed description: none av…
176120	WBGene00018846	F54H12.6	P34460	49	1.711	3	2	0.117	11862	1.26454	AALGSAPNASTYPNVAR	IPIGYGIK	2	1	0.08	11290	0.88574	AALGSAPNASTYPNVAR	NA	1.07514	WBGene00018846	eef-1B.1	F54H12.6	Concise description: none available Provisional description: none available Detailed description: none available
172062	WBGene00004436	D1007.12	O01868	57	1.7103								6	4	0.201	11290	2.65722	MKVETCVYSGYK	KGTHGQEQVTR	1.32861	WBGene00004436	rpl-24.1	D1007.12	Concise description: rpl-24.1 encodes a large ribosomal subunit L24 protein. Provisional description: rpl-24.1 encodes a large ribosomal subunit L24 protein. Detailed description: none available
171750	WBGene00004441	C53H9.1	P91914	58	1.6911	3	2	0.213	11862	1.26454	TYPHAIIAGIDRYPLK	SVDVAFDKTNINK	5	3	0.213	11290	2.21435	SVDVAFDKTNINK	TYPHAIIAGIDRYPLK	1.73944	WBGene00004441	rpl-27	C53H9.1	Concise description: rpl-27 encodes a large ribosomal subunit L27 protein. Provisional description: rpl-27 encodes a large ribosomal subunit L27 protein. Detailed description: none available
171646	WBGene00022042	Y65B4BR.5	V6CKR1	66	1.6763	7	3	0.183	11862	2.9506	VAEAAGLGDHIDKQAK	IEDLTQHAQMSAIENLKPTR	4	3	0.183	11290	1.77148	VAEAAGLGDHIDKQAK	IEDLTQHAQMSAIENLKPTR	2.36104	WBGene00022042	icd-2	Y65B4BR.5a	Concise description: none available Provisional description: none available Detailed description: none available
178778	WBGene00004422	T22F3.4	Q94300	63	1.5908								10	4	0.23	11290	4.4287	VLEQLTGQTPVFSK	GPKAEEILEK	2.21435	WBGene00004422	rpl-11.1	T22F3.4	Concise description: rpl-11.1 encodes a large ribosomal subunit L11 protein. Provisional description: This gene encodes a protein predicted by Eisenberg and coworkers, with 52 percentage accuracy, to be mitochondrial. Proteins localized to a given organelle by experiments tend to share a characteristic phylogenetic distribution of their homologs, called a phylogenetic profile. For instance, mitoc…
176121	WBGene00000041	F54H12.1	P34455	49	1.5864	3	2	0.044	11862	1.26454	LDFNPLTDELTAADGSK	TIFTITPGSEQVR	2	1	0.025	11290	0.88574	LDFNPLTDELTAADGSK	NA	1.07514	WBGene00000041	aco-2	F54H12.1a	Concise description: aco-2 encodes an aconitase homolog that is required for embryonic viability, fertility, locomotion, and vulval morphogenesis, and perhaps for normal lifespan. Provisional description: Mitochondrial aconitase, an enzyme in the citric acid cycle, has been described as a specific target during aging of the housefly, and might be such a target in C. elegans as well; direct observ…
172715	WBGene00009342	F32H2.5	P91871	46	1.5516	5	3	0.018	11862	2.10757	SENDDELESFLGSLGK	SNTDGHKEHGITFPSGER								1.05378	WBGene00009342	fasn-1	F32H2.5	Concise description: fasn-1 encodes a fatty acid synthase, orthologous to human FASN (OMIM:600212); CEP-1 is required for fully normal fasn-1 expression in vivo; CEP-1 drives transcription of luciferase reporters whose promoters contains either of two putative CEP-1 binding sites (FAS-T1 and FAS-T2) found in the fasn-1 gene, and this activity is partially lost by mutation of conserved CEP-1 resid…
177097	WBGene00021088	W08E12.7	W08E12.7	47	1.5198	3	2	0.102	11862	1.26454	SLRPDTENTTITK	IAGLPFDSDVYQSDLTVKDPELQAVLK	1	1	0.033	11290	0.44287	SLRPDTENTTITK	NA	0.853705	WBGene00021088	W08E12.7	W08E12.7	Concise description: none available Provisional description: none available Detailed description: none available
175966	WBGene00002083	F57B9.6	P27639	62	1.5174	6	5	0.134	11862	2.52908	AIVPCTTGKDVIAQAQSGTGK	KDELTLEGIR	2	2	0.057	11290	0.88574	KGVAINFVTENDAR	RKVDTLTEK	1.70741	WBGene00002083	inf-1	F57B9.6a	Concise description: inf-1 encodes a protein with high similarity to eukaryotic initiation factor 4A. Provisional description: inf-1 encodes a protein with high similarity to eukaryotic initiation factor 4A. Detailed description: none available
175796	WBGene00004435	B0336.10	P48158	60	1.4733	4	2	0.214	11862	1.68606	ISLGLPVGAVMNCADNTGAK	GSAITGPVAK	3	2	0.214	11290	1.32861	ISLGLPVGAVMNCADNTGAK	GSAITGPVAK	1.50734	WBGene00004435	rpl-23	B0336.10	Concise description: rpl-23 encodes a large ribosomal subunit L23 protein. Provisional description: rpl-23 encodes a large ribosomal subunit L23 protein. Detailed description: none available
177636	WBGene00017075	D2096.8	Q19007	48	1.4704	2	2	0.136	11862	0.843028	TIQIESDFYKR	AIVAGEVEPTKEQIDTPILEGLEGDQLAELYK	2	2	0.07	11290	0.88574	VHELEIEFEGK	TIQIESDFYKR	0.864384	WBGene00017075	nap-1	D2096.8	Concise description: D2096.8 encodes a protein related in sequence to the conserved NAP (Nucleosome Assembly Protein) family of proteins involved in chromatin remodeling; loss of D2096.8 activity in wild-type and various mutant backgrounds suggests that, in C. elegans, the product of D2096.8 is required for proper transcriptional regulation that affects a number of biological processes including …
178012	WBGene00004474	T05E11.1	P49041	61	1.4491	4	2	0.157	11862	1.68606	TIAECLADELINAAK	SVNVSDISLVDYIPVKEK	3	2	0.157	11290	1.32861	TIAECLADELINAAK	SVNVSDISLVDYIPVKEK	1.50734	WBGene00004474	rps-5	T05E11.1	Concise description: rps-5 encodes a small ribosomal subunit S5 protein. Provisional description: rps-5 encodes a small ribosomal subunit S5 protein. Detailed description: none available
172818	WBGene00004426	C04F12.4	Q9XVE9	62	1.4308	3	2	0.17	11862	1.26454	VQIDGPSSDVTR	AAIVNVIDGNR	4	2	0.17	11290	1.77148	VQIDGPSSDVTR	AAIVNVIDGNR	1.51801	WBGene00004426	rpl-14	C04F12.4	Concise description: rpl-14 encodes a large ribosomal subunit L14 protein. Provisional description: rpl-14 encodes a large ribosomal subunit L14 protein. Detailed description: none available
179999	WBGene00001423	T01C3.7	Q22053	58	1.4135	3	3	0.094	11862	1.26454	GGLENTHIKPGTK	VVVEPHR	3	3	0.131	11290	1.32861	GGLENTHIKPGTK	VSVDDGAGSIEYR	1.29658	WBGene00001423	fib-1	T01C3.7	Concise description: fib-1 encodes the C. elegans ortholog of Saccharomyces cerevisiae Nop1p, an essential component of the U3 SnoRNP; FIB-1 localizes to the nucleolus. Provisional description: fib-1 encodes the C. elegans ortholog of Saccharomyces cerevisiae Nop1p, an essential component of the U3 SnoRNP; FIB-1 localizes to the nucleolus. Detailed description: none available
174141	WBGene00004930	C15F1.7	P34697	38	1.4133	4	3	0.259	11862	1.68606	HVGDLGNVEAGADGVAK	SMVVHAGQDDLGEGVGDKAEESKK								0.84303	WBGene00004930	sod-1	C15F1.7a	Concise description: sod-1 encodes the copper/zinc superoxide dismustase, an enzyme that is known to protect cells from oxidative damage; superoxide dismutase activity can be detected in worm extracts; sod-1 activity has been implicated in the increased life-span of dauer larvae where this enzyme demonstrates the highest activity compared to other life-stages as well as in the increased life span…
173873	WBGene00004434	C27A2.2	P52819	63	1.413	2	1	0.085	11862	0.843028	IEDLEAFLNEK	NA	5	3	0.262	11290	2.21435	IEDLEAFLNEK	SKVSVVSEVPFSK	1.52869	WBGene00004434	rpl-22	C27A2.2a	Concise description: rpl-22 encodes a large ribosomal subunit L22 protein; by homology, RPL-22 is predicted to function in protein biosynthesis; in C. elegans, RPL-22 activity is broadly required for embryonic and germline development, as well as normal body coloration, morphology, and postembryonic growth rates. Provisional description: rpl-22 encodes a large ribosomal subunit L22 protein; by ho…
24104384	WBGene00004432	E04A4.8	O44480	64	1.3861	3	2	0.133	11862	1.26454	ALGETLNEYVVVGR	VFEKNPGTVK	4	2	0.139	11290	1.77148	ALGETLNEYVVVGR	QVFEKNPGTVK	1.51801	WBGene00004432	rpl-20	E04A4.8	Concise description: rpl-20 encodes a large ribosomal subunit L18a protein. Provisional description: rpl-20 encodes a large ribosomal subunit L18a protein. Detailed description: none available
172201	WBGene00004431	C09D4.5	O02639	65	1.36	4	3	0.162	11862	1.68606	RLVNDGLIIR	KQLADQAQAR	3	2	0.106	11290	1.32861	RLVNDGLIIR	AKQLADQAQAR	1.50734	WBGene00004431	rpl-19	C09D4.5	Concise description: rpl-19 encodes a large ribosomal subunit L19 protein. Provisional description: rpl-19 encodes a large ribosomal subunit L19 protein. Detailed description: none available
175315	WBGene00021248	Y22D7AL.10	Y22D7AL.10	49	1.3415								4	3	0.389	11290	1.77148	VLEATVVSAGAGLR	VVVEDKEYSIFR	0.88574	WBGene00021248	Y22D7AL.10	Y22D7AL.10	Concise description: none available Provisional description: none available Detailed description: none available
180027	WBGene00000883	Y75B12B.2	P52015	44	1.0765	3	3	0.211	11862	1.26454	GNGTGGESIYGEKFPDENFKEK	IIPEFMIQGGDFTR								0.63227	WBGene00000883	cyn-7	Y75B12B.2	Concise description: cyn-7 encodes a cyclophilin A isoform; while not tested for peptidyl-prolyl isomerase activity in vitro, it is very similar to CYN-3 and closely resembles the prototypical CypA, and is therefore likely to be a member of the cytosolic CsA-binding cyclophilin subfamily; CYN-7 was required for embryonic viability in one set of mass RNAi assays. Provisional description: CYN-7 has…
176015	WBGene00004417	R151.3	P47991	57	1.0528	2	2	0.083	11862	0.843028	IPEHINDEYFK	NLPVISR	1	1	0.032	11290	0.44287	NLPVISR	NA	0.642949	WBGene00004417	rpl-6	R151.3	Concise description: rpl-6 encodes a large ribosomal subunit L6 protein. Provisional description: rpl-6 encodes a large ribosomal subunit L6 protein. Detailed description: none available
175573	WBGene00011110	R07E5.2	Q21824	45	1.0096	3	3	0.128	11862	1.26454	ADSFGVLDKESGLSYR	VDETLR								0.63227	WBGene00011110	prdx-3	R07E5.2	Concise description: prdx-3 encodes one of two C. elegans typical 2-Cys peroxiredoxins, peroxidase enzymes that reduce hydrogen peroxide and contribute to the oxidative-stress response of multicellular organisms. Provisional description: prdx-3 encodes one of two C. elegans typical 2-Cys peroxiredoxins, peroxidase enzymes that reduce hydrogen peroxide and contribute to the oxidative-stress respon…
