# Supplementary material for: The LRR-TM protein PAN-1 interacts with MYRF to promote its nuclear translocation in synaptic remodeling
Source: eLife. 2021 May 5;10:e67628. doi: 10.7554/eLife.67628 (PMC8099431; doi:10.7554/eLife.67628)
Supplement: Supplementary file 4. [file elife-67628-supp4.xlsx]

## Sheet: Sheet1
t-test; p value;
		BLW1419 (ybqIs47) marker only	BLW827 myrf-1(ybq6)	myrf-1(#); myrf-2(ybq42)					BLW1419 (ybqIs47) marker only	BLW1008 myrf-1(ybq6);myrf-2(ybq42)
BLW827 myrf-1(ybq6)	14h			0.1707			BLW1008 myrf-1(ybq6);myrf-1(ybq42)	14h
	16h	0.8769						16h
	19h	0.0002		0.0081				19h	＜0.0001
	21h	＜0.0001		＜0.0001				21h	＜0.0001
	24h	0.0002		＜0.0001				24h	＜0.0001
	28h	＜0.0001		＜0.0001				28h	＜0.0001
BLW1570 myrf-1(syb1313)	14h		0.0067	0.9065			BLW1756 myrf-1(syb1313)；myrf-1(ybq42)	14h		0.0006
	16h	＜0.0001	＜0.0001	＜0.0001				16h	0.0689
	19h	0.3759	0.001	0.6744				19h	0.1855	＜0.0001
	21h	0.0006	＜0.0001	0.0002				21h	0.0704	＜0.0001
	24h	0.0001	＜0.0001	＜0.0001				24h	0.0329	＜0.0001
	28h	0.0019	＜0.0001	0.7385				28h	0.0025	＜0.0001
BLW1571 myrf-1(syb1333)	14h		0.1135				BLW1779 myrf-1(syb1333)；myrf-1(ybq42)	14h
	16h	0.9131	0.9078					16h
	19h	0.0114	0.249	＜0.0001				19h	＜0.0001	0.144
	21h	＜0.0001	0.774	＜0.0001				21h	＜0.0001	0.0175
	24h	0.061	0.0269	＜0.0001				24h	＜0.0001	0.0168
	28h	＜0.0001	0.6846	＜0.0001				28h	＜0.0001	0.0001
BLW1617 myrf-1(syb1491)	14h						BLW1760 myrf-1(syb1491)；myrf-1(ybq42)	14h
	16h	0.0233	0.0005	0.1749				16h	0.0869	0.1749
	19h	＜0.0001	0.0215	0.3538				19h	＜0.0001	0.972
	21h	＜0.0001	0.0038	0.1498				21h	＜0.0001	0.3459
	24h	0.0211	0.02	＜0.0001				24h	＜0.0001	0.3776
	28h	＜0.0001	0.2264	＜0.0001				28h	＜0.0001	0.016
BLW1615 myrf-1(syb1468)	14h						BLW1758 myrf-1(syb1468)；myrf-1(ybq42)	14h
	16h			0.0398				16h
	19h	＜0.0001	＜0.0001	0.0028				19h	＜0.0001	0.3432
	21h	＜0.0001	0.0028	0.0626				21h	＜0.0001	0.1073
	24h	＜0.0001	0.0001	＜0.0001				24h	＜0.0001	0.3224
	28h	＜0.0001	＜0.0001	＜0.0001				28h	＜0.0001	0.0187
BLW1617 myrf-1(syb1487)	14h						BLW1760 myrf-1(syb1487)；myrf-1(ybq42)	14h
	16h							16h
	19h	＜0.0001	0.0002	0.7291				19h	＜0.0001	0.774
	21h	＜0.0001	0.0426	＜0.0001				21h	＜0.0001	0.0495
	24h	＜0.0001	＜0.0001	＜0.0001				24h	＜0.0001	0.0052
	28h	＜0.0001	＜0.0001	＜0.0001				28h	＜0.0001	0.689
Note: For certain data set, the value of all data point was zero; therefore, a t-test could not be performed.
